# Supplementary material for: Single-Molecule Long-Read Sequencing Reveals the Diversity of Full-Length Transcripts in Leaves of Gnetum (Gnetales)
Source: Int J Mol Sci. 2019 Dec 17;20(24):6350. doi: 10.3390/ijms20246350 (PMC6941099; doi:10.3390/ijms20246350)
Supplement: Supplementary file 1 [file ijms-20-06350-s001.zip]

Archive with 5 entries (5 files):
- File S1. List of isoforms from novel genes in Gnetum leaves.xls
- File S2. List of the predicted lncRNAs.xls
- File S3. Results of poly(A) prediction.xls
- File S4. List of bHLH gene family identified in Gnetum genome and leaf transcriptome.xls
- ijms-627358-supplementary figures.pdf
