# Supplementary material for: Single-Molecule Long-Read Sequencing Reveals the Diversity of Full-Length Transcripts in Leaves of Gnetum (Gnetales)
Source: Int J Mol Sci. 2019 Dec 17;20(24):6350. doi: 10.3390/ijms20246350 (PMC6941099; doi:10.3390/ijms20246350)
Supplement: Supplementary file 1 [file ijms-20-06350-s001.zip › File S1. List of isoforms from novel genes in Gnetum leaves.xls]

## Sheet: novel transcript 
GeneID	IsoformID	Chromosome	Start	End	Strand	Exon_number
TnS000456907g03	TnS000456907g03_novel01	scaffold456907	447371	477946	+	17
TnS000456907g03	TnS000456907g03_novel02	scaffold456907	447616	450698	+	2
TnS000456907g03	TnS000456907g03_novel03	scaffold456907	485516	489068	+	5
TnS000942155g01	TnS000942155g01_novel01	scaffold942155	25200	71990	-	10
TnS000942155g01	TnS000942155g01_novel02	scaffold942155	25200	71449	-	9
TnS000251821g11	TnS000251821g11_novel01	scaffold251821	984505	988885	-	3
TnS000902549g01	TnS000902549g01_novel01	scaffold902549	162341	173017	+	19
TnS000952953g05	TnS000952953g05_novel01	scaffold952953	426533	428286	+	1
TnS000692159g22	TnS000692159g22_novel01	scaffold692159	2652845	2670675	-	16
TnS000006921g01	TnS000006921g01_novel01	scaffold6921	4314	5954	+	1
TnS000115783g01	TnS000115783g01_novel01	scaffold115783	53383	57895	+	3
TnS001037561g01	TnS001037561g01_novel01	scaffold1037561	87034	90806	+	12
TnS001037561g01	TnS001037561g01_novel02	scaffold1037561	87038	90811	+	11
TnS000471885g02	TnS000471885g02_novel01	scaffold471885	100664	117805	+	5
TnS000089499g03	TnS000089499g03_novel01	scaffold89499	313813	333304	-	7
TnS000457203g15	TnS000457203g15_novel01	scaffold457203	1074186	1084659	+	9
TnS000457203g15	TnS000457203g15_novel02	scaffold457203	1075648	1084659	+	8
TnS000457203g15	TnS000457203g15_novel03	scaffold457203	1075899	1084681	+	8
TnS000457203g15	TnS000457203g15_novel04	scaffold457203	1076619	1084648	+	7
TnS000457203g15	TnS000457203g15_novel05	scaffold457203	1078300	1084659	+	6
TnS000457203g15	TnS000457203g15_novel06	scaffold457203	1079150	1084658	+	5
TnS000587381g01	TnS000587381g01_novel01	scaffold587381	155731	159250	-	7
TnS000568463g01	TnS000568463g01_novel01	scaffold568463	63122	80868	-	19
TnS000568463g01	TnS000568463g01_novel02	scaffold568463	98930	105376	-	6
TnS000548585g11	TnS000548585g11_novel01	scaffold548585	437651	440361	-	3
TnS000125481g06	TnS000125481g06_novel01	scaffold125481	913387	915159	-	4
TnS000135199g01	TnS000135199g01_novel01	scaffold135199	88443	100412	+	5
TnS000185733g02	TnS000185733g02_novel01	scaffold185733	139886	151968	-	8
TnS000879045g08	TnS000879045g08_novel01	scaffold879045	406796	412225	-	7
TnS000593089g05	TnS000593089g05_novel01	scaffold593089	407319	457438	-	16
TnS000138315g02	TnS000138315g02_novel01	scaffold138315	289184	290986	-	1
TnS000156791g01	TnS000156791g01_novel01	scaffold156791	15171	19023	+	12
TnS000031647g18	TnS000031647g18_novel01	scaffold31647	1815464	1817363	+	2
TnS000361895g02	TnS000361895g02_novel01	scaffold361895	360550	365917	+	5
TnS000361895g02	TnS000361895g02_novel02	scaffold361895	360551	365914	+	5
TnS000361895g02	TnS000361895g02_novel03	scaffold361895	361535	362521	+	1
TnS000574413g05	TnS000574413g05_novel01	scaffold574413	1138198	1145270	-	12
TnS000261797g16	TnS000261797g16_novel01	scaffold261797	1094941	1103579	+	29
TnS000487635g02	TnS000487635g02_novel01	scaffold487635	1050593	1055821	+	12
TnS000718023g01	TnS000718023g01_novel01	scaffold718023	13916	19054	+	9
TnS000718023g01	TnS000718023g01_novel02	scaffold718023	13988	19110	+	9
TnS000718023g01	TnS000718023g01_novel03	scaffold718023	14043	19169	+	9
TnS000718023g01	TnS000718023g01_novel04	scaffold718023	14000	19108	+	8
TnS000718023g01	TnS000718023g01_novel05	scaffold718023	15785	19105	+	6
TnS000718023g01	TnS000718023g01_novel06	scaffold718023	16498	19080	+	4
TnS000903297g06	TnS000903297g06_novel01	scaffold903297	801446	806648	-	13
TnS000903297g06	TnS000903297g06_novel02	scaffold903297	801426	806646	-	13
TnS000903297g06	TnS000903297g06_novel03	scaffold903297	801358	804662	-	10
TnS000104175g03	TnS000104175g03_novel01	scaffold104175	191821	197484	+	5
TnS000785057g02	TnS000785057g02_novel01	scaffold785057	507774	511213	-	8
TnS000441621g14	TnS000441621g14_novel01	scaffold441621	890459	894034	-	2
TnS000441621g14	TnS000441621g14_novel02	scaffold441621	865710	870451	-	3
TnS000949469g05	TnS000949469g05_novel01	scaffold949469	582836	584874	+	2
TnS000628203g08	TnS000628203g08_novel01	scaffold628203	646178	681572	+	7
TnS000694813g02	TnS000694813g02_novel01	scaffold694813	44466	49683	-	5
TnS000137343g11	TnS000137343g11_novel01	scaffold137343	511965	517473	-	3
TnS000137343g11	TnS000137343g11_novel02	scaffold137343	511454	517471	-	5
TnS000265641g01	TnS000265641g01_novel01	scaffold265641	37852	39231	-	2
TnS000265641g01	TnS000265641g01_novel02	scaffold265641	37984	39222	-	1
TnS000171641g04	TnS000171641g04_novel01	scaffold171641	175477	202512	+	9
TnS000171641g04	TnS000171641g04_novel02	scaffold171641	175478	202593	+	10
TnS000714517g01	TnS000714517g01_novel01	scaffold714517	51427	54645	+	7
TnS000714517g01	TnS000714517g01_novel02	scaffold714517	51569	55375	+	7
TnS000553067g03	TnS000553067g03_novel01	scaffold553067	168374	173193	+	1
TnS000669031g02	TnS000669031g02_novel01	scaffold669031	616253	621840	+	1
TnS000669031g02	TnS000669031g02_novel02	scaffold669031	637296	658769	+	5
TnS000963655g02	TnS000963655g02_novel01	scaffold963655	115273	119238	-	6
TnS000400187g09	TnS000400187g09_novel01	scaffold400187	1102075	1129861	+	11
TnS000400187g09	TnS000400187g09_novel02	scaffold400187	1102260	1129885	+	11
TnS000400187g09	TnS000400187g09_novel03	scaffold400187	1102177	1124252	+	6
TnS000400187g09	TnS000400187g09_novel04	scaffold400187	1104868	1125364	+	4
TnS000198091g06	TnS000198091g06_novel01	scaffold198091	632027	634314	+	2
TnS000719089g15	TnS000719089g15_novel01	scaffold719089	901376	905321	-	10
TnS000237087g03	TnS000237087g03_novel01	scaffold237087	123165	133799	-	23
TnS000237087g03	TnS000237087g03_novel02	scaffold237087	123279	133799	-	23
TnS000237087g03	TnS000237087g03_novel03	scaffold237087	123337	131973	-	22
TnS000237087g03	TnS000237087g03_novel04	scaffold237087	123305	130265	-	16
TnS000237087g03	TnS000237087g03_novel05	scaffold237087	123307	126445	-	8
TnS001013105g01	TnS001013105g01_novel01	scaffold1013105	251763	255689	+	1
TnS000547167g05	TnS000547167g05_novel01	scaffold547167	747054	759629	-	13
TnS000958803g01	TnS000958803g01_novel01	scaffold958803	32738	36084	+	8
TnS000958803g01	TnS000958803g01_novel02	scaffold958803	34453	37538	+	9
TnS000958803g01	TnS000958803g01_novel03	scaffold958803	35175	37567	+	10
TnS000014537g06	TnS000014537g06_novel01	scaffold14537	761906	766471	-	6
TnS000014537g06	TnS000014537g06_novel02	scaffold14537	761864	766339	-	5
TnS000014537g06	TnS000014537g06_novel03	scaffold14537	761882	766321	-	8
TnS000014537g06	TnS000014537g06_novel04	scaffold14537	761880	766204	-	7
TnS000322161g03	TnS000322161g03_novel01	scaffold322161	150923	166705	+	10
TnS000752563g05	TnS000752563g05_novel01	scaffold752563	378715	380137	+	3
TnS000726069g09	TnS000726069g09_novel01	scaffold726069	637435	639740	-	3
TnS000200641g02	TnS000200641g02_novel01	scaffold200641	164045	170622	-	5
TnS000313131g02	TnS000313131g02_novel01	scaffold313131	81953	85649	-	10
TnS000313131g02	TnS000313131g02_novel02	scaffold313131	83425	85649	-	8
TnS000313131g02	TnS000313131g02_novel03	scaffold313131	83268	85084	-	6
TnS000238395g01	TnS000238395g01_novel01	scaffold238395	265345	266678	+	1
TnS000238395g01	TnS000238395g01_novel02	scaffold238395	266840	270069	+	7
TnS000867017g23	TnS000867017g23_novel01	scaffold867017	2605196	2607589	-	4
TnS000867017g23	TnS000867017g23_novel02	scaffold867017	2605302	2607589	-	4
TnS000867017g23	TnS000867017g23_novel03	scaffold867017	2605301	2607589	-	3
TnS000867017g23	TnS000867017g23_novel04	scaffold867017	2605126	2607583	-	5
TnS000867565g02	TnS000867565g02_novel01	scaffold867565	69152	75684	+	18
TnS000867565g02	TnS000867565g02_novel02	scaffold867565	72758	75684	+	9
TnS000382331g01	TnS000382331g01_novel01	scaffold382331	810	33321	-	12
TnS000382331g01	TnS000382331g01_novel02	scaffold382331	729	33258	-	11
TnS000720319g02	TnS000720319g02_novel01	scaffold720319	14406	20504	-	8
TnS000820811g02	TnS000820811g02_novel01	scaffold820811	58066	64575	-	11
TnS000820811g02	TnS000820811g02_novel02	scaffold820811	58516	63661	-	8
TnS000820811g02	TnS000820811g02_novel03	scaffold820811	58258	62620	-	6
TnS000820811g02	TnS000820811g02_novel04	scaffold820811	58567	62312	-	5
TnS000401131g07	TnS000401131g07_novel01	scaffold401131	385086	386860	-	1
TnS001042873g06	TnS001042873g06_novel01	scaffold1042873	541129	542578	+	2
TnS000422333g01	TnS000422333g01_novel01	scaffold422333	50818	57493	-	10
TnS000821935g14	TnS000821935g14_novel01	scaffold821935	653019	661507	+	6
TnS000468173g05	TnS000468173g05_novel01	scaffold468173	491099	494891	+	3
TnS000070227g03	TnS000070227g03_novel01	scaffold70227	212708	213924	+	1
TnS000770087g01	TnS000770087g01_novel01	scaffold770087	24881	27822	+	8
TnS001021927g08	TnS001021927g08_novel01	scaffold1021927	582016	587349	+	8
TnS000868489g06	TnS000868489g06_novel01	scaffold868489	443386	447890	+	7
TnS000868489g06	TnS000868489g06_novel02	scaffold868489	443389	447721	+	7
TnS000258901g03	TnS000258901g03_novel01	scaffold258901	320848	331710	-	7
TnS000258901g03	TnS000258901g03_novel02	scaffold258901	320784	327903	-	4
TnS000142969g10	TnS000142969g10_novel01	scaffold142969	854193	856079	-	1
TnS000816741g01	TnS000816741g01_novel01	scaffold816741	136336	156753	-	5
TnS000621603g01	TnS000621603g01_novel01	scaffold621603	80900	83057	+	1
TnS000155763g02	TnS000155763g02_novel01	scaffold155763	61814	69944	-	5
TnS000795913g02	TnS000795913g02_novel01	scaffold795913	347650	350951	+	4
TnS000198223g07	TnS000198223g07_novel01	scaffold198223	411941	412954	+	3
TnS000032089g05	TnS000032089g05_novel01	scaffold32089	389292	392987	+	3
TnS000385199g01	TnS000385199g01_novel01	scaffold385199	255902	263324	-	10
TnS000385199g01	TnS000385199g01_novel02	scaffold385199	274371	276574	-	2
TnS000399489g04	TnS000399489g04_novel01	scaffold399489	47406	50324	+	11
TnS000498063g74	TnS000498063g74_novel01	scaffold498063	6639685	6642597	+	2
TnS000199425g09	TnS000199425g09_novel01	scaffold199425	701234	714794	+	7
TnS000970673g01	TnS000970673g01_novel01	scaffold970673	2816	3699	-	1
TnS000862679g01	TnS000862679g01_novel01	scaffold862679	4361	7299	+	7
TnS000008893g01	TnS000008893g01_novel01	scaffold8893	108479	110446	+	1
TnS000008893g01	TnS000008893g01_novel02	scaffold8893	165943	168145	+	3
TnS000076323g04	TnS000076323g04_novel01	scaffold76323	764468	776505	-	6
TnS000105903g10	TnS000105903g10_novel01	scaffold105903	799185	803158	-	10
TnS000105903g10	TnS000105903g10_novel02	scaffold105903	799402	803094	-	10
TnS000105903g10	TnS000105903g10_novel03	scaffold105903	799402	803094	-	11
TnS000105903g10	TnS000105903g10_novel04	scaffold105903	799399	802800	-	9
TnS001028123g03	TnS001028123g03_novel01	scaffold1028123	254266	269874	-	6
TnS000452573g07	TnS000452573g07_novel01	scaffold452573	1020117	1023554	+	1
TnS000452573g07	TnS000452573g07_novel02	scaffold452573	1021781	1023560	+	1
TnS000452573g07	TnS000452573g07_novel03	scaffold452573	1020179	1023451	+	3
TnS000877399g02	TnS000877399g02_novel01	scaffold877399	163782	168774	+	2
TnS000138315g01	TnS000138315g01_novel01	scaffold138315	18036	18247	+	1
TnS000150445g02	TnS000150445g02_novel01	scaffold150445	186423	191976	+	10
TnS000366987g03	TnS000366987g03_novel01	scaffold366987	276846	285755	+	9
TnS000857305g04	TnS000857305g04_novel01	scaffold857305	125813	131307	+	8
TnS000586029g01	TnS000586029g01_novel01	scaffold586029	788	6769	+	5
TnS000486009g02	TnS000486009g02_novel01	scaffold486009	46400	206790	-	34
TnS000486009g02	TnS000486009g02_novel02	scaffold486009	46468	93771	-	11
TnS000207311g02	TnS000207311g02_novel01	scaffold207311	18529	23855	+	7
TnS000207311g02	TnS000207311g02_novel02	scaffold207311	18535	23845	+	6
TnS000207311g02	TnS000207311g02_novel03	scaffold207311	20343	23779	+	5
TnS000830595g02	TnS000830595g02_novel01	scaffold830595	57507	60793	+	2
TnS000830595g02	TnS000830595g02_novel02	scaffold830595	57514	60792	+	1
TnS000830595g02	TnS000830595g02_novel03	scaffold830595	59240	60792	+	1
TnS000830595g02	TnS000830595g02_novel04	scaffold830595	57524	60791	+	3
TnS000830595g02	TnS000830595g02_novel05	scaffold830595	57583	60746	+	3
TnS000830595g02	TnS000830595g02_novel06	scaffold830595	57590	60793	+	3
TnS000830595g02	TnS000830595g02_novel07	scaffold830595	57635	60792	+	3
TnS000830595g02	TnS000830595g02_novel08	scaffold830595	57636	60795	+	3
TnS000830595g02	TnS000830595g02_novel09	scaffold830595	57524	60792	+	4
TnS000830595g02	TnS000830595g02_novel10	scaffold830595	58788	60614	+	2
TnS000839783g03	TnS000839783g03_novel01	scaffold839783	117893	178632	+	16
TnS001039185g01	TnS001039185g01_novel01	scaffold1039185	133069	136571	+	2
TnS000597069g03	TnS000597069g03_novel01	scaffold597069	363006	366647	+	3
TnS000597069g03	TnS000597069g03_novel02	scaffold597069	364833	366907	+	3
TnS000597069g03	TnS000597069g03_novel03	scaffold597069	365267	366657	+	2
TnS000597069g03	TnS000597069g03_novel04	scaffold597069	365577	366512	+	1
TnS000597069g03	TnS000597069g03_novel05	scaffold597069	365659	366655	+	1
TnS000238769g09	TnS000238769g09_novel01	scaffold238769	1012308	1016105	+	2
TnS000377897g08	TnS000377897g08_novel01	scaffold377897	445973	460384	+	5
TnS000041551g01	TnS000041551g01_novel01	scaffold41551	70439	104491	-	9
TnS000826901g01	TnS000826901g01_novel01	scaffold826901	47753	62234	-	7
TnS000389811g02	TnS000389811g02_novel01	scaffold389811	198902	240483	-	11
TnS000389811g02	TnS000389811g02_novel02	scaffold389811	237201	240459	-	2
TnS000389811g02	TnS000389811g02_novel03	scaffold389811	200562	201364	-	1
TnS000020033g04	TnS000020033g04_novel01	scaffold20033	273923	275756	+	2
TnS000020033g04	TnS000020033g04_novel02	scaffold20033	273958	275803	+	1
TnS000509191g01	TnS000509191g01_novel01	scaffold509191	12787	15904	-	3
TnS000824839g16	TnS000824839g16_novel01	scaffold824839	1477757	1479633	+	1
TnS000560433g10	TnS000560433g10_novel01	scaffold560433	478089	484110	-	3
TnS000560433g10	TnS000560433g10_novel02	scaffold560433	478084	481123	-	2
TnS000435351g04	TnS000435351g04_novel01	scaffold435351	425753	432328	-	6
TnS000293877g03	TnS000293877g03_novel01	scaffold293877	372464	377853	-	11
TnS000084833g09	TnS000084833g09_novel01	scaffold84833	1035335	1036393	+	1
TnS000124723g10	TnS000124723g10_novel01	scaffold124723	740941	742661	+	2
TnS000785057g07	TnS000785057g07_novel01	scaffold785057	1199710	1202463	-	3
TnS000487577g04	TnS000487577g04_novel01	scaffold487577	580547	581611	+	1
TnS000994153g01	TnS000994153g01_novel01	scaffold994153	110943	146558	-	10
TnS000726289g06	TnS000726289g06_novel01	scaffold726289	584721	586429	+	1
TnS001012745g01	TnS001012745g01_novel01	scaffold1012745	153352	159861	+	15
TnS001032845g12	TnS001032845g12_novel01	scaffold1032845	1511313	1515576	-	8
TnS000979943g01	TnS000979943g01_novel01	scaffold979943	84135	121717	-	9
TnS000453267g02	TnS000453267g02_novel01	scaffold453267	859327	875905	+	6
TnS000453267g02	TnS000453267g02_novel02	scaffold453267	860546	899762	+	12
TnS000453267g02	TnS000453267g02_novel03	scaffold453267	872795	899717	+	10
TnS000106601g02	TnS000106601g02_novel01	scaffold106601	83638	90469	+	4
TnS001019773g06	TnS001019773g06_novel01	scaffold1019773	625674	627491	+	3
TnS000950953g07	TnS000950953g07_novel01	scaffold950953	261290	268566	-	14
TnS000254591g06	TnS000254591g06_novel01	scaffold254591	477791	481154	-	4
TnS000097109g26	TnS000097109g26_novel01	scaffold97109	2095275	2097741	-	6
TnS000097109g26	TnS000097109g26_novel02	scaffold97109	2095436	2097379	-	5
TnS000817183g23	TnS000817183g23_novel01	scaffold817183	1575212	1580450	-	5
TnS001043071g04	TnS001043071g04_novel01	scaffold1043071	364333	365722	+	1
TnS000515867g03	TnS000515867g03_novel01	scaffold515867	140536	141989	+	1
TnS000782471g01	TnS000782471g01_novel01	scaffold782471	116768	120891	+	2
TnS000782471g01	TnS000782471g01_novel02	scaffold782471	119538	121015	+	1
TnS001013965g10	TnS001013965g10_novel01	scaffold1013965	886184	891395	+	5
TnS001013965g10	TnS001013965g10_novel02	scaffold1013965	886188	891133	+	4
TnS001013965g10	TnS001013965g10_novel03	scaffold1013965	888373	891162	+	3
TnS000681293g02	TnS000681293g02_novel01	scaffold681293	367376	368247	+	1
TnS001022817g02	TnS001022817g02_novel01	scaffold1022817	139571	147727	+	3
TnS000201967g04	TnS000201967g04_novel01	scaffold201967	581724	583524	-	2
TnS000757933g03	TnS000757933g03_novel01	scaffold757933	409751	413951	+	2
TnS000170799g06	TnS000170799g06_novel01	scaffold170799	306109	310245	-	1
TnS000076667g06	TnS000076667g06_novel01	scaffold76667	515232	517569	-	2
TnS000076667g06	TnS000076667g06_novel02	scaffold76667	515282	517569	-	3
TnS000075981g03	TnS000075981g03_novel01	scaffold75981	158040	168832	-	13
TnS000829583g08	TnS000829583g08_novel01	scaffold829583	893771	924760	-	5
TnS000829583g08	TnS000829583g08_novel02	scaffold829583	916234	924760	-	5
TnS000310845g04	TnS000310845g04_novel01	scaffold310845	244579	335904	+	14
TnS000680989g05	TnS000680989g05_novel01	scaffold680989	774113	776102	+	1
TnS000680989g05	TnS000680989g05_novel02	scaffold680989	779927	781671	+	1
TnS000548585g06	TnS000548585g06_novel01	scaffold548585	221170	225997	-	6
TnS000301319g07	TnS000301319g07_novel01	scaffold301319	236572	242850	+	6
TnS000301319g07	TnS000301319g07_novel02	scaffold301319	236588	242852	+	6
TnS000301319g07	TnS000301319g07_novel03	scaffold301319	236584	242899	+	7
TnS000301319g07	TnS000301319g07_novel04	scaffold301319	241248	242852	+	2
TnS000826449g02	TnS000826449g02_novel01	scaffold826449	97867	105760	+	10
TnS000815875g01	TnS000815875g01_novel01	scaffold815875	14602	40968	+	12
TnS000215639g05	TnS000215639g05_novel01	scaffold215639	378260	378655	-	1
TnS000389811g01	TnS000389811g01_novel01	scaffold389811	158177	160178	-	4
TnS000292171g01	TnS000292171g01_novel01	scaffold292171	128151	131109	-	4
TnS000035489g02	TnS000035489g02_novel01	scaffold35489	418372	465859	+	11
TnS000841501g02	TnS000841501g02_novel01	scaffold841501	156087	159897	+	1
TnS000920213g01	TnS000920213g01_novel01	scaffold920213	16289	19028	-	3
TnS000197697g14	TnS000197697g14_novel01	scaffold197697	1337554	1344327	+	1
TnS000197697g14	TnS000197697g14_novel02	scaffold197697	1340455	1346078	+	1
TnS000035493g19	TnS000035493g19_novel01	scaffold35493	1491192	1499102	+	4
TnS000035493g19	TnS000035493g19_novel02	scaffold35493	1491239	1499128	+	6
TnS000106039g07	TnS000106039g07_novel01	scaffold106039	634824	642832	-	13
TnS000146501g01	TnS000146501g01_novel01	scaffold146501	43171	45244	+	2
TnS000756241g03	TnS000756241g03_novel01	scaffold756241	551532	553910	+	2
TnS000009469g06	TnS000009469g06_novel01	scaffold9469	631009	634655	-	2
TnS000009469g06	TnS000009469g06_novel02	scaffold9469	610968	633783	-	5
TnS000895889g04	TnS000895889g04_novel01	scaffold895889	184675	189279	-	3
TnS000895889g04	TnS000895889g04_novel02	scaffold895889	184733	189245	-	3
TnS000249451g04	TnS000249451g04_novel01	scaffold249451	762219	795083	-	19
TnS000961077g01	TnS000961077g01_novel01	scaffold961077	3329	5729	+	5
TnS000955355g08	TnS000955355g08_novel01	scaffold955355	1177730	1197885	-	14
TnS000380561g01	TnS000380561g01_novel01	scaffold380561	11981	14076	+	2
TnS000030161g05	TnS000030161g05_novel01	scaffold30161	379359	380353	-	1
TnS000062909g01	TnS000062909g01_novel01	scaffold62909	3142	7158	+	5
TnS000062909g01	TnS000062909g01_novel02	scaffold62909	4397	7243	+	3
TnS013906298g01	TnS013906298g01_novel01	scaffold13906298	2332	4119	-	3
TnS000861503g07	TnS000861503g07_novel01	scaffold861503	445266	453359	+	7
TnS000912337g06	TnS000912337g06_novel01	scaffold912337	326179	330110	-	10
TnS000220661g05	TnS000220661g05_novel01	scaffold220661	728414	740825	-	20
TnS000220661g05	TnS000220661g05_novel02	scaffold220661	728416	739902	-	19
TnS000036863g02	TnS000036863g02_novel01	scaffold36863	13002	17128	+	3
TnS000036863g02	TnS000036863g02_novel02	scaffold36863	13063	17197	+	3
TnS000036863g02	TnS000036863g02_novel03	scaffold36863	13006	17149	+	2
TnS000036863g02	TnS000036863g02_novel04	scaffold36863	13006	17127	+	1
TnS000075125g01	TnS000075125g01_novel01	scaffold75125	72934	80876	+	14
TnS000354929g05	TnS000354929g05_novel01	scaffold354929	666430	670823	-	5
TnS000615653g06	TnS000615653g06_novel01	scaffold615653	855376	868274	+	7
TnS001029283g06	TnS001029283g06_novel01	scaffold1029283	223324	224653	-	2
TnS000888107g09	TnS000888107g09_novel01	scaffold888107	911484	934739	-	8
TnS000888107g09	TnS000888107g09_novel02	scaffold888107	924817	934692	-	2
TnS000932809g02	TnS000932809g02_novel01	scaffold932809	92242	96072	+	8
TnS000968581g04	TnS000968581g04_novel01	scaffold968581	468391	470095	+	2
TnS000968581g04	TnS000968581g04_novel02	scaffold968581	468452	470187	+	2
TnS000968581g04	TnS000968581g04_novel03	scaffold968581	468393	470187	+	1
TnS000123293g02	TnS000123293g02_novel01	scaffold123293	422020	425012	-	6
TnS000999649g02	TnS000999649g02_novel01	scaffold999649	360053	394415	-	26
TnS000445193g03	TnS000445193g03_novel01	scaffold445193	273075	357123	-	14
TnS000434859g01	TnS000434859g01_novel01	scaffold434859	16935	21999	+	16
TnS000434859g01	TnS000434859g01_novel02	scaffold434859	16946	21999	+	16
TnS000434859g01	TnS000434859g01_novel03	scaffold434859	17111	23325	+	17
TnS000434859g01	TnS000434859g01_novel04	scaffold434859	20866	23302	+	7
TnS000591365g20	TnS000591365g20_novel01	scaffold591365	2340039	2344611	-	6
TnS000591365g20	TnS000591365g20_novel02	scaffold591365	2339982	2342837	-	4
TnS001036485g02	TnS001036485g02_novel01	scaffold1036485	330705	337426	+	8
TnS001036485g02	TnS001036485g02_novel02	scaffold1036485	330728	337415	+	7
TnS001036485g02	TnS001036485g02_novel03	scaffold1036485	331012	337424	+	7
TnS000139467g01	TnS000139467g01_novel01	scaffold139467	12056	16124	+	4
TnS000139467g01	TnS000139467g01_novel02	scaffold139467	13128	16124	+	3
TnS000194003g01	TnS000194003g01_novel01	scaffold194003	3718	26139	+	6
TnS000194003g01	TnS000194003g01_novel02	scaffold194003	25869	26109	+	1
TnS000915517g03	TnS000915517g03_novel01	scaffold915517	99695	121111	+	3
TnS000915517g03	TnS000915517g03_novel02	scaffold915517	99827	101946	+	2
TnS000867565g04	TnS000867565g04_novel01	scaffold867565	200796	206978	-	8
TnS000746445g03	TnS000746445g03_novel01	scaffold746445	235843	244184	+	7
TnS000402333g01	TnS000402333g01_novel01	scaffold402333	5768	46055	-	8
TnS000845041g01	TnS000845041g01_novel01	scaffold845041	129641	159208	+	9
TnS000522447g01	TnS000522447g01_novel01	scaffold522447	32228	37209	+	3
TnS000161755g05	TnS000161755g05_novel01	scaffold161755	528778	539270	-	16
TnS000115905g03	TnS000115905g03_novel01	scaffold115905	158588	162137	-	14
TnS000115905g03	TnS000115905g03_novel02	scaffold115905	158603	162137	-	13
TnS000115905g03	TnS000115905g03_novel03	scaffold115905	158623	162137	-	12
TnS000070333g03	TnS000070333g03_novel01	scaffold70333	215058	336260	-	24
TnS000070333g03	TnS000070333g03_novel02	scaffold70333	215031	269870	-	11
TnS000881023g01	TnS000881023g01_novel01	scaffold881023	28290	37176	-	9
TnS000711683g01	TnS000711683g01_novel01	scaffold711683	241306	242926	+	1
TnS000062973g03	TnS000062973g03_novel01	scaffold62973	1387359	1408388	+	9
TnS000666215g02	TnS000666215g02_novel01	scaffold666215	23750	27205	-	5
TnS000019527g03	TnS000019527g03_novel01	scaffold19527	467255	475225	-	15
TnS000019527g03	TnS000019527g03_novel02	scaffold19527	467262	475225	-	14
TnS000019527g03	TnS000019527g03_novel03	scaffold19527	466812	475034	-	15
TnS000019527g03	TnS000019527g03_novel04	scaffold19527	466762	474896	-	16
TnS000961765g01	TnS000961765g01_novel01	scaffold961765	38799	42650	-	2
TnS000850087g05	TnS000850087g05_novel01	scaffold850087	1423327	1427609	+	6
TnS000041003g05	TnS000041003g05_novel01	scaffold41003	444273	456042	-	11
TnS000041003g05	TnS000041003g05_novel02	scaffold41003	444261	455997	-	12
TnS000465489g01	TnS000465489g01_novel01	scaffold465489	1245	5164	-	2
TnS000809851g16	TnS000809851g16_novel01	scaffold809851	2146825	2153590	-	11
TnS000858491g03	TnS000858491g03_novel01	scaffold858491	143976	150862	-	7
TnS000827737g06	TnS000827737g06_novel01	scaffold827737	595648	611359	+	12
TnS000827737g06	TnS000827737g06_novel02	scaffold827737	595738	613060	+	14
TnS000827737g06	TnS000827737g06_novel03	scaffold827737	596144	613183	+	15
TnS000122145g07	TnS000122145g07_novel01	scaffold122145	595680	628408	-	8
TnS000122145g07	TnS000122145g07_novel02	scaffold122145	614286	628408	-	7
TnS000729105g02	TnS000729105g02_novel01	scaffold729105	145927	157419	+	8
TnS000552883g10	TnS000552883g10_novel01	scaffold552883	1494734	1495679	-	2
TnS000552883g10	TnS000552883g10_novel02	scaffold552883	1494735	1495680	-	1
TnS000901477g03	TnS000901477g03_novel01	scaffold901477	178974	185217	+	10
TnS000738653g01	TnS000738653g01_novel01	scaffold738653	70697	135477	-	4
TnS000738653g01	TnS000738653g01_novel02	scaffold738653	70706	135197	-	3
TnS000533031g02	TnS000533031g02_novel01	scaffold533031	91336	92106	+	2
TnS000189967g04	TnS000189967g04_novel01	scaffold189967	334634	365546	+	8
TnS000189967g04	TnS000189967g04_novel02	scaffold189967	334736	365569	+	6
TnS000332527g09	TnS000332527g09_novel01	scaffold332527	609177	615199	+	3
TnS000384203g03	TnS000384203g03_novel01	scaffold384203	292630	294960	-	2
TnS000384203g03	TnS000384203g03_novel02	scaffold384203	290007	294889	-	3
TnS000238919g01	TnS000238919g01_novel01	scaffold238919	33585	37126	+	2
TnS000945599g01	TnS000945599g01_novel01	scaffold945599	9951	42773	+	6
TnS000752563g17	TnS000752563g17_novel01	scaffold752563	1471247	1476088	+	8
TnS000752563g17	TnS000752563g17_novel02	scaffold752563	1474120	1476561	+	6
TnS000356227g06	TnS000356227g06_novel01	scaffold356227	390093	391193	+	1
TnS000168645g02	TnS000168645g02_novel01	scaffold168645	169905	194279	-	9
TnS000723939g01	TnS000723939g01_novel01	scaffold723939	94914	96726	+	1
TnS000710945g01	TnS000710945g01_novel01	scaffold710945	53540	59065	+	5
TnS000124723g14	TnS000124723g14_novel01	scaffold124723	1112649	1164397	-	17
TnS000414293g01	TnS000414293g01_novel01	scaffold414293	20808	31417	+	9
TnS000609421g03	TnS000609421g03_novel01	scaffold609421	265778	269447	-	10
TnS000888527g02	TnS000888527g02_novel01	scaffold888527	245228	250344	+	4
TnS000306961g03	TnS000306961g03_novel01	scaffold306961	620340	631948	-	9
TnS000279713g14	TnS000279713g14_novel01	scaffold279713	1752911	1758288	-	12
TnS000201147g03	TnS000201147g03_novel01	scaffold201147	218368	220897	-	2
TnS000201147g03	TnS000201147g03_novel02	scaffold201147	210669	220875	-	3
TnS000409729g09	TnS000409729g09_novel01	scaffold409729	687780	688031	+	1
TnS000895551g01	TnS000895551g01_novel01	scaffold895551	39755	80566	+	8
TnS000895551g01	TnS000895551g01_novel02	scaffold895551	104188	105986	+	1
TnS000814197g05	TnS000814197g05_novel01	scaffold814197	441746	453814	-	12
TnS000233773g03	TnS000233773g03_novel01	scaffold233773	230775	232735	-	2
TnS000800909g01	TnS000800909g01_novel01	scaffold800909	112667	117763	+	15
TnS000279713g09	TnS000279713g09_novel01	scaffold279713	759629	771455	-	12
TnS000243729g01	TnS000243729g01_novel01	scaffold243729	35008	41660	-	5
TnS000243729g01	TnS000243729g01_novel02	scaffold243729	35151	41548	-	4
TnS000243729g01	TnS000243729g01_novel03	scaffold243729	34944	40483	-	5
TnS000292477g02	TnS000292477g02_novel01	scaffold292477	464618	473899	-	6
TnS000292477g02	TnS000292477g02_novel02	scaffold292477	464620	471562	-	3
TnS000292477g02	TnS000292477g02_novel03	scaffold292477	464618	468140	-	2
TnS000148149g09	TnS000148149g09_novel01	scaffold148149	467795	504094	-	14
TnS000148149g09	TnS000148149g09_novel02	scaffold148149	467836	503880	-	14
TnC225304994g01	TnC225304994g01_novel01	C225304994	355	1132	+	1
TnS000113183g06	TnS000113183g06_novel01	scaffold113183	670801	676838	+	9
TnS000041403g02	TnS000041403g02_novel01	scaffold41403	73334	77632	-	10
TnS000740941g02	TnS000740941g02_novel01	scaffold740941	413048	480357	+	9
TnS000887441g01	TnS000887441g01_novel01	scaffold887441	107989	110803	+	9
TnS000391609g03	TnS000391609g03_novel01	scaffold391609	135211	153485	-	9
TnS000345359g04	TnS000345359g04_novel01	scaffold345359	326953	360227	-	14
TnS000345359g04	TnS000345359g04_novel02	scaffold345359	326989	360156	-	15
TnS000345359g04	TnS000345359g04_novel03	scaffold345359	348260	360105	-	9
TnS000088173g01	TnS000088173g01_novel01	scaffold88173	190040	192537	+	5
TnS000790525g06	TnS000790525g06_novel01	scaffold790525	320656	323422	-	2
TnS000790525g06	TnS000790525g06_novel02	scaffold790525	320657	323421	-	2
TnS000790525g06	TnS000790525g06_novel03	scaffold790525	320657	323422	-	4
TnS000790525g06	TnS000790525g06_novel04	scaffold790525	320657	321826	-	1
TnS000686971g02	TnS000686971g02_novel01	scaffold686971	251132	252988	-	3
TnS000686971g02	TnS000686971g02_novel02	scaffold686971	293336	295121	-	2
TnS000726839g04	TnS000726839g04_novel01	scaffold726839	275645	277583	+	1
TnS000474381g02	TnS000474381g02_novel01	scaffold474381	210437	273658	-	15
TnS000767679g07	TnS000767679g07_novel01	scaffold767679	338757	347644	-	6
TnS000106555g03	TnS000106555g03_novel01	scaffold106555	93588	102459	-	7
TnS000394931g01	TnS000394931g01_novel01	scaffold394931	17264	20214	+	2
TnS000237615g01	TnS000237615g01_novel01	scaffold237615	80206	93964	+	18
TnS000237615g01	TnS000237615g01_novel02	scaffold237615	85573	94004	+	12
TnS000430305g01	TnS000430305g01_novel01	scaffold430305	17482	38138	-	15
TnS000732031g03	TnS000732031g03_novel01	scaffold732031	291563	295275	+	2
TnS000110183g04	TnS000110183g04_novel01	scaffold110183	646915	649049	+	3
TnS000949469g08	TnS000949469g08_novel01	scaffold949469	786826	796712	+	9
TnS000949469g08	TnS000949469g08_novel02	scaffold949469	787211	796717	+	8
TnS001039353g02	TnS001039353g02_novel01	scaffold1039353	141663	146285	+	2
TnS001007481g04	TnS001007481g04_novel01	scaffold1007481	79003	85846	-	5
TnS000149975g04	TnS000149975g04_novel01	scaffold149975	545617	557956	-	12
TnS000149975g04	TnS000149975g04_novel02	scaffold149975	545032	547131	-	4
TnS000167267g02	TnS000167267g02_novel01	scaffold167267	320286	322390	+	4
TnS000223209g01	TnS000223209g01_novel01	scaffold223209	181605	185030	-	7
TnS000661921g03	TnS000661921g03_novel01	scaffold661921	604987	606996	-	3
TnS000208343g02	TnS000208343g02_novel01	scaffold208343	489049	573885	+	9
TnS000208343g02	TnS000208343g02_novel02	scaffold208343	489056	576900	+	9
TnS000208343g02	TnS000208343g02_novel03	scaffold208343	490740	496276	+	1
TnS000037287g09	TnS000037287g09_novel01	scaffold37287	770204	778760	-	10
TnS000037287g09	TnS000037287g09_novel02	scaffold37287	770203	778712	-	11
TnS000037287g09	TnS000037287g09_novel03	scaffold37287	770204	778710	-	11
TnS000037287g09	TnS000037287g09_novel04	scaffold37287	770201	778637	-	11
TnS000037287g09	TnS000037287g09_novel05	scaffold37287	770317	775421	-	5
TnS000572633g02	TnS000572633g02_novel01	scaffold572633	272945	278448	-	10
TnS000572633g02	TnS000572633g02_novel02	scaffold572633	272923	278086	-	10
TnS000875687g02	TnS000875687g02_novel01	scaffold875687	256110	264538	-	8
TnS000120933g01	TnS000120933g01_novel01	scaffold120933	4545	9237	-	6
TnS000120933g01	TnS000120933g01_novel02	scaffold120933	4437	8652	-	4
TnS000120933g01	TnS000120933g01_novel03	scaffold120933	4582	8654	-	6
TnS000120933g01	TnS000120933g01_novel04	scaffold120933	4787	7621	-	3
TnS000120933g01	TnS000120933g01_novel05	scaffold120933	4545	7315	-	4
TnS000370427g13	TnS000370427g13_novel01	scaffold370427	1145502	1149206	+	2
TnS000370427g13	TnS000370427g13_novel02	scaffold370427	1145628	1148380	+	2
TnS000114139g17	TnS000114139g17_novel01	scaffold114139	2448472	2449561	+	4
TnS000007359g06	TnS000007359g06_novel01	scaffold7359	1115192	1123706	+	22
TnS000007359g06	TnS000007359g06_novel02	scaffold7359	1115207	1118526	+	6
TnS000007359g06	TnS000007359g06_novel03	scaffold7359	1115455	1123694	+	22
TnS000007359g06	TnS000007359g06_novel04	scaffold7359	1123726	1127505	+	10
TnS000007359g06	TnS000007359g06_novel05	scaffold7359	1126077	1127483	+	3
TnS000408579g08	TnS000408579g08_novel01	scaffold408579	275786	287866	-	20
TnS000950979g01	TnS000950979g01_novel01	scaffold950979	58421	72285	+	22
TnS000950979g01	TnS000950979g01_novel02	scaffold950979	68238	72282	+	7
TnS000776413g16	TnS000776413g16_novel01	scaffold776413	1575990	1586216	+	15
TnS000776413g16	TnS000776413g16_novel02	scaffold776413	1575990	1586071	+	14
TnS000776413g16	TnS000776413g16_novel03	scaffold776413	1575996	1586160	+	14
TnS000776413g16	TnS000776413g16_novel04	scaffold776413	1576523	1586146	+	14
TnS000197697g06	TnS000197697g06_novel01	scaffold197697	476677	495486	+	8
TnS000086873g05	TnS000086873g05_novel01	scaffold86873	295846	304357	+	6
TnS000297983g03	TnS000297983g03_novel01	scaffold297983	331526	333042	-	2
TnS001032845g07	TnS001032845g07_novel01	scaffold1032845	978194	986612	-	12
TnS001032845g07	TnS001032845g07_novel02	scaffold1032845	978189	986448	-	11
TnS001032845g07	TnS001032845g07_novel03	scaffold1032845	969661	969967	-	1
TnS001016959g02	TnS001016959g02_novel01	scaffold1016959	15287	19330	+	5
TnS000958223g02	TnS000958223g02_novel01	scaffold958223	36202	44835	-	7
TnS000940919g02	TnS000940919g02_novel01	scaffold940919	110007	119764	+	2
TnS000940919g02	TnS000940919g02_novel02	scaffold940919	110007	119780	+	3
TnS000940919g02	TnS000940919g02_novel03	scaffold940919	110026	119602	+	3
TnS000752563g27	TnS000752563g27_novel01	scaffold752563	2089019	2103018	-	8
TnS000823801g02	TnS000823801g02_novel01	scaffold823801	107898	138848	+	18
TnS000823801g02	TnS000823801g02_novel02	scaffold823801	109020	113349	+	1
TnS000823801g02	TnS000823801g02_novel03	scaffold823801	128232	138883	+	11
TnS000489311g01	TnS000489311g01_novel01	scaffold489311	9156	19999	+	17
TnS000483985g02	TnS000483985g02_novel01	scaffold483985	520301	522581	+	2
TnS000217675g01	TnS000217675g01_novel01	scaffold217675	16941	21381	+	3
TnS001029887g02	TnS001029887g02_novel01	scaffold1029887	724888	731058	+	9
TnS001029887g02	TnS001029887g02_novel02	scaffold1029887	724928	730993	+	7
TnS013911380g01	TnS013911380g01_novel01	scaffold13911380	1	6286	+	6
TnS013911380g01	TnS013911380g01_novel02	scaffold13911380	1	6287	+	7
TnS013911380g01	TnS013911380g01_novel03	scaffold13911380	1	6294	+	7
TnS013911380g01	TnS013911380g01_novel04	scaffold13911380	1	6289	+	5
TnS000041667g02	TnS000041667g02_novel01	scaffold41667	261648	264779	+	1
TnS000500167g03	TnS000500167g03_novel01	scaffold500167	127101	133267	+	9
TnS000500167g03	TnS000500167g03_novel02	scaffold500167	127103	133104	+	9
TnS000500167g03	TnS000500167g03_novel03	scaffold500167	127106	133265	+	10
TnS000500167g03	TnS000500167g03_novel04	scaffold500167	130940	133265	+	5
TnS000734207g06	TnS000734207g06_novel01	scaffold734207	861768	867777	-	21
TnS000877399g13	TnS000877399g13_novel01	scaffold877399	1493275	1497808	-	3
TnS000859105g01	TnS000859105g01_novel01	scaffold859105	1729	3146	+	4
TnS000925207g09	TnS000925207g09_novel01	scaffold925207	1232931	1233907	+	3
TnS000104321g01	TnS000104321g01_novel01	scaffold104321	19400	23901	+	6
TnS000955727g01	TnS000955727g01_novel01	scaffold955727	7655	9056	-	2
TnS000887639g03	TnS000887639g03_novel01	scaffold887639	501242	502421	+	1
TnS000137335g05	TnS000137335g05_novel01	scaffold137335	270090	285613	+	3
TnS000137335g05	TnS000137335g05_novel02	scaffold137335	278138	283429	+	1
TnS000976981g01	TnS000976981g01_novel01	scaffold976981	109937	125211	+	15
TnS000976981g01	TnS000976981g01_novel02	scaffold976981	109939	125209	+	13
TnS000976981g01	TnS000976981g01_novel03	scaffold976981	109940	125095	+	13
TnS000390199g03	TnS000390199g03_novel01	scaffold390199	138564	141047	+	1
TnS000494949g07	TnS000494949g07_novel01	scaffold494949	322092	326476	+	8
TnS000494949g07	TnS000494949g07_novel02	scaffold494949	322091	326319	+	8
TnS000494949g07	TnS000494949g07_novel03	scaffold494949	322044	329024	+	10
TnS000494949g07	TnS000494949g07_novel04	scaffold494949	322098	329039	+	10
TnS000494949g07	TnS000494949g07_novel05	scaffold494949	323801	325940	+	7
TnS000494949g07	TnS000494949g07_novel06	scaffold494949	326469	329040	+	2
TnS001038095g02	TnS001038095g02_novel01	scaffold1038095	151982	153323	+	1
TnS000706221g02	TnS000706221g02_novel01	scaffold706221	201989	211456	-	9
TnS000478477g09	TnS000478477g09_novel01	scaffold478477	758240	765545	-	17
TnS000478477g09	TnS000478477g09_novel02	scaffold478477	758249	765303	-	18
TnS000478477g09	TnS000478477g09_novel03	scaffold478477	758215	764876	-	16
TnS000478477g09	TnS000478477g09_novel04	scaffold478477	758278	764062	-	15
TnS000478477g09	TnS000478477g09_novel05	scaffold478477	758244	763461	-	12
TnS000117837g01	TnS000117837g01_novel01	scaffold117837	2735	8664	-	12
TnS000117837g01	TnS000117837g01_novel02	scaffold117837	2981	8664	-	12
TnS000117837g01	TnS000117837g01_novel03	scaffold117837	2800	8501	-	10
TnS000117837g01	TnS000117837g01_novel04	scaffold117837	2769	8424	-	11
TnS000117837g01	TnS000117837g01_novel05	scaffold117837	2769	6552	-	8
TnS000117837g01	TnS000117837g01_novel06	scaffold117837	2777	5863	-	6
TnS000157591g07	TnS000157591g07_novel01	scaffold157591	526425	528188	+	1
TnS000494949g02	TnS000494949g02_novel01	scaffold494949	116879	118878	-	1
TnS001026243g01	TnS001026243g01_novel01	scaffold1026243	31563	36073	+	2
TnS000479359g08	TnS000479359g08_novel01	scaffold479359	713883	715419	+	3
TnS000984855g12	TnS000984855g12_novel01	scaffold984855	896996	904243	+	5
TnS000984855g12	TnS000984855g12_novel02	scaffold984855	898596	904265	+	4
TnS000980175g01	TnS000980175g01_novel01	scaffold980175	153731	154181	+	1
TnS000362467g01	TnS000362467g01_novel01	scaffold362467	24369	28833	+	8
TnS000042743g01	TnS000042743g01_novel01	scaffold42743	54123	64264	+	7
TnS000931667g01	TnS000931667g01_novel01	scaffold931667	116887	117394	+	1
TnS000052095g05	TnS000052095g05_novel01	scaffold52095	990904	993302	+	4
TnS000770539g04	TnS000770539g04_novel01	scaffold770539	380586	383659	-	3
TnS000413187g02	TnS000413187g02_novel01	scaffold413187	292847	391998	-	15
TnS000413187g02	TnS000413187g02_novel02	scaffold413187	292880	391907	-	15
TnS000628475g02	TnS000628475g02_novel01	scaffold628475	140593	163934	+	17
TnS000141025g01	TnS000141025g01_novel01	scaffold141025	13782	17557	-	2
TnS000141025g01	TnS000141025g01_novel02	scaffold141025	9346	13890	-	10
TnS000201295g01	TnS000201295g01_novel01	scaffold201295	25978	31544	-	6
TnS000201295g01	TnS000201295g01_novel02	scaffold201295	29221	31534	-	2
TnS000201295g01	TnS000201295g01_novel03	scaffold201295	25722	31416	-	7
TnS000201295g01	TnS000201295g01_novel04	scaffold201295	25915	30229	-	5
TnS000201295g01	TnS000201295g01_novel05	scaffold201295	25980	29367	-	4
TnS000201295g01	TnS000201295g01_novel06	scaffold201295	25920	26261	-	1
TnS000230667g01	TnS000230667g01_novel01	scaffold230667	13312	15655	-	3
TnS000329869g01	TnS000329869g01_novel01	scaffold329869	41299	146298	+	15
TnS000739813g05	TnS000739813g05_novel01	scaffold739813	729387	812130	+	10
TnS000739813g05	TnS000739813g05_novel02	scaffold739813	733618	812092	+	10
TnS000242443g08	TnS000242443g08_novel01	scaffold242443	471756	477197	-	9
TnS000242443g08	TnS000242443g08_novel02	scaffold242443	471758	476762	-	10
TnS000242443g08	TnS000242443g08_novel03	scaffold242443	471760	474389	-	5
TnS000189069g04	TnS000189069g04_novel01	scaffold189069	508685	511417	+	3
TnS000577257g04	TnS000577257g04_novel01	scaffold577257	320588	325683	-	8
TnS000577257g04	TnS000577257g04_novel02	scaffold577257	320588	323522	-	6
TnS000680827g04	TnS000680827g04_novel01	scaffold680827	199456	207897	+	6
TnS000680827g04	TnS000680827g04_novel02	scaffold680827	199460	207651	+	7
TnS000680827g04	TnS000680827g04_novel03	scaffold680827	206126	207756	+	2
TnS000470617g06	TnS000470617g06_novel01	scaffold470617	404916	426040	-	16
TnS000470617g06	TnS000470617g06_novel02	scaffold470617	404899	425831	-	15
TnS000275493g02	TnS000275493g02_novel01	scaffold275493	244253	248037	+	4
TnS000275493g02	TnS000275493g02_novel02	scaffold275493	244446	248041	+	5
TnS000078691g03	TnS000078691g03_novel01	scaffold78691	241035	248557	+	21
TnS000540733g02	TnS000540733g02_novel01	scaffold540733	162708	187433	+	11
TnS000540733g02	TnS000540733g02_novel02	scaffold540733	162872	187117	+	10
TnS000049607g10	TnS000049607g10_novel01	scaffold49607	521202	525242	-	2
TnS000214873g01	TnS000214873g01_novel01	scaffold214873	71912	73289	+	1
TnS000214873g01	TnS000214873g01_novel02	scaffold214873	71913	73470	+	1
TnS000822415g04	TnS000822415g04_novel01	scaffold822415	63430	75024	-	10
TnS000857275g03	TnS000857275g03_novel01	scaffold857275	376542	378691	+	5
TnS000288615g01	TnS000288615g01_novel01	scaffold288615	257881	264367	-	5
TnS000027131g01	TnS000027131g01_novel01	scaffold27131	82099	83084	+	1
TnS000005245g02	TnS000005245g02_novel01	scaffold5245	65818	80061	+	15
TnS000005245g02	TnS000005245g02_novel02	scaffold5245	65924	80057	+	15
TnS000732881g02	TnS000732881g02_novel01	scaffold732881	61314	65140	+	6
TnS000758487g03	TnS000758487g03_novel01	scaffold758487	102348	115482	+	10
TnS000674141g28	TnS000674141g28_novel01	scaffold674141	2712128	2720014	-	13
TnS000674141g28	TnS000674141g28_novel02	scaffold674141	2712145	2719546	-	12
TnS000111477g08	TnS000111477g08_novel01	scaffold111477	601945	643626	+	12
TnS000971197g06	TnS000971197g06_novel01	scaffold971197	367339	368989	-	5
TnS000009225g03	TnS000009225g03_novel01	scaffold9225	226653	232424	+	8
TnS000086355g02	TnS000086355g02_novel01	scaffold86355	262745	273865	+	14
TnS000086355g02	TnS000086355g02_novel02	scaffold86355	262771	273866	+	13
TnS000086355g02	TnS000086355g02_novel03	scaffold86355	262773	273791	+	13
TnS000086355g02	TnS000086355g02_novel04	scaffold86355	264404	274102	+	10
TnS000438403g17	TnS000438403g17_novel01	scaffold438403	1417253	1425220	-	4
TnS000051575g18	TnS000051575g18_novel01	scaffold51575	2068744	2072289	+	1
TnS000989535g03	TnS000989535g03_novel01	scaffold989535	247908	254088	-	12
TnS000203467g03	TnS000203467g03_novel01	scaffold203467	253916	272794	+	7
TnS000115905g01	TnS000115905g01_novel01	scaffold115905	36254	46754	-	17
TnS000115905g01	TnS000115905g01_novel02	scaffold115905	36289	46685	-	16
TnS000115905g01	TnS000115905g01_novel03	scaffold115905	36289	44857	-	13
TnS000915177g01	TnS000915177g01_novel01	scaffold915177	45750	49140	-	3
TnS000247197g01	TnS000247197g01_novel01	scaffold247197	28256	32036	+	8
TnS000809851g12	TnS000809851g12_novel01	scaffold809851	1837884	1841073	-	5
TnS000141783g01	TnS000141783g01_novel01	scaffold141783	312923	315606	+	1
TnS000353875g02	TnS000353875g02_novel01	scaffold353875	484180	486329	+	2
TnS000155889g04	TnS000155889g04_novel01	scaffold155889	209904	216263	+	6
TnS000155889g04	TnS000155889g04_novel02	scaffold155889	209992	216585	+	6
TnS000468329g01	TnS000468329g01_novel01	scaffold468329	74945	76447	+	1
TnS000776413g05	TnS000776413g05_novel01	scaffold776413	620461	630189	+	25
TnS000776413g05	TnS000776413g05_novel02	scaffold776413	627934	630412	+	9
TnS000826481g04	TnS000826481g04_novel01	scaffold826481	755507	758030	+	4
TnS000078327g05	TnS000078327g05_novel01	scaffold78327	490903	502852	+	4
TnS000256293g01	TnS000256293g01_novel01	scaffold256293	6098	18643	+	13
TnS000256293g01	TnS000256293g01_novel02	scaffold256293	6574	18737	+	12
TnS001041575g01	TnS001041575g01_novel01	scaffold1041575	97868	100793	+	3
TnS000354929g01	TnS000354929g01_novel01	scaffold354929	26053	29069	-	3
TnS000314283g06	TnS000314283g06_novel01	scaffold314283	450597	461468	-	10
TnS000314283g06	TnS000314283g06_novel02	scaffold314283	450525	452218	-	3
TnS001002091g07	TnS001002091g07_novel01	scaffold1002091	482274	488783	+	13
TnS001002091g07	TnS001002091g07_novel02	scaffold1002091	482352	488809	+	12
TnS001002091g07	TnS001002091g07_novel03	scaffold1002091	488432	488917	+	1
TnS000767679g02	TnS000767679g02_novel01	scaffold767679	109155	128117	+	7
TnS000767679g02	TnS000767679g02_novel02	scaffold767679	110653	128345	+	7
TnS000899285g03	TnS000899285g03_novel01	scaffold899285	402938	410193	-	9
TnS000899285g03	TnS000899285g03_novel02	scaffold899285	402898	410157	-	8
TnS000899285g03	TnS000899285g03_novel03	scaffold899285	402911	406670	-	7
TnS000497601g07	TnS000497601g07_novel01	scaffold497601	861281	870312	+	12
TnS000497601g07	TnS000497601g07_novel02	scaffold497601	866299	872360	+	9
TnS000533731g01	TnS000533731g01_novel01	scaffold533731	144030	146827	-	2
TnS000261349g18	TnS000261349g18_novel01	scaffold261349	1639832	1692441	-	7
TnS000042319g03	TnS000042319g03_novel01	scaffold42319	442195	443745	-	1
TnS000042319g03	TnS000042319g03_novel02	scaffold42319	440793	442538	-	1
TnS000805763g04	TnS000805763g04_novel01	scaffold805763	298928	303831	+	4
TnS000805763g04	TnS000805763g04_novel02	scaffold805763	298928	303741	+	5
TnS000264493g25	TnS000264493g25_novel01	scaffold264493	1454063	1458480	-	6
TnS000821471g04	TnS000821471g04_novel01	scaffold821471	248552	261424	+	16
TnS000928569g04	TnS000928569g04_novel01	scaffold928569	933392	937546	-	2
TnS000827737g01	TnS000827737g01_novel01	scaffold827737	90047	94335	+	5
TnS000827737g01	TnS000827737g01_novel02	scaffold827737	90053	94340	+	7
TnS000827737g01	TnS000827737g01_novel03	scaffold827737	90053	94329	+	6
TnS000296435g01	TnS000296435g01_novel01	scaffold296435	484308	493617	-	8
TnS000176469g03	TnS000176469g03_novel01	scaffold176469	238870	249679	+	6
TnS000176469g03	TnS000176469g03_novel02	scaffold176469	247244	249494	+	3
TnS000100047g04	TnS000100047g04_novel01	scaffold100047	468366	471478	+	1
TnS000332373g02	TnS000332373g02_novel01	scaffold332373	54415	56376	-	6
TnS000332373g02	TnS000332373g02_novel02	scaffold332373	54411	56252	-	3
TnS000332373g02	TnS000332373g02_novel03	scaffold332373	54580	56221	-	4
TnS000264493g15	TnS000264493g15_novel01	scaffold264493	908002	917461	+	8
TnS000380841g01	TnS000380841g01_novel01	scaffold380841	103482	106060	+	6
TnS000380841g01	TnS000380841g01_novel02	scaffold380841	104153	106159	+	3
TnS000380841g01	TnS000380841g01_novel03	scaffold380841	104809	106153	+	1
TnS000052291g01	TnS000052291g01_novel01	scaffold52291	114240	118856	+	4
TnS000970371g02	TnS000970371g02_novel01	scaffold970371	170241	179216	+	4
TnS000453207g01	TnS000453207g01_novel01	scaffold453207	94730	97323	+	2
TnS000875947g01	TnS000875947g01_novel01	scaffold875947	8978	14021	+	11
TnS000875947g01	TnS000875947g01_novel02	scaffold875947	8980	14059	+	11
TnS000875947g01	TnS000875947g01_novel03	scaffold875947	9217	14061	+	10
TnS000875947g01	TnS000875947g01_novel04	scaffold875947	9224	13911	+	10
TnS000875947g01	TnS000875947g01_novel05	scaffold875947	13166	14483	+	1
TnS000546657g02	TnS000546657g02_novel01	scaffold546657	69549	87443	+	11
TnS000546657g02	TnS000546657g02_novel02	scaffold546657	69784	87256	+	8
TnS000546657g02	TnS000546657g02_novel03	scaffold546657	69791	87672	+	10
TnS000546657g02	TnS000546657g02_novel04	scaffold546657	71515	87672	+	11
TnS000546657g02	TnS000546657g02_novel05	scaffold546657	77873	79593	+	1
TnS000972139g02	TnS000972139g02_novel01	scaffold972139	56621	58650	+	4
TnS000810133g02	TnS000810133g02_novel01	scaffold810133	110088	111477	-	2
TnS000002047g01	TnS000002047g01_novel01	scaffold2047	73540	94645	-	7
TnS000002047g01	TnS000002047g01_novel02	scaffold2047	70862	91631	-	11
TnS000892201g03	TnS000892201g03_novel01	scaffold892201	237185	240479	+	4
TnS000892201g03	TnS000892201g03_novel02	scaffold892201	237228	240572	+	4
TnS000546833g09	TnS000546833g09_novel01	scaffold546833	685748	687043	+	2
TnS000870413g01	TnS000870413g01_novel01	scaffold870413	53148	54985	+	1
TnS000153581g02	TnS000153581g02_novel01	scaffold153581	22181	24872	-	3
TnS000674141g32	TnS000674141g32_novel01	scaffold674141	3017658	3020074	+	4
TnS000420067g01	TnS000420067g01_novel01	scaffold420067	25629	29427	+	3
TnS000476983g03	TnS000476983g03_novel01	scaffold476983	331595	337088	-	13
TnS000210897g01	TnS000210897g01_novel01	scaffold210897	112554	116313	+	2
TnS000035757g02	TnS000035757g02_novel01	scaffold35757	14028	16059	-	3
TnS000035757g02	TnS000035757g02_novel02	scaffold35757	14029	15998	-	4
TnS000145253g09	TnS000145253g09_novel01	scaffold145253	422397	428482	-	6
TnS000145253g09	TnS000145253g09_novel02	scaffold145253	422459	426005	-	3
TnS000420823g05	TnS000420823g05_novel01	scaffold420823	582136	588211	-	3
TnS000420823g05	TnS000420823g05_novel02	scaffold420823	579338	580149	-	3
TnS000226197g02	TnS000226197g02_novel01	scaffold226197	104555	105925	-	4
TnS000507375g31	TnS000507375g31_novel01	scaffold507375	2296565	2298396	+	2
TnS000662243g04	TnS000662243g04_novel01	scaffold662243	307790	310386	+	2
TnS000662243g04	TnS000662243g04_novel02	scaffold662243	307790	310382	+	1
TnS000662243g04	TnS000662243g04_novel03	scaffold662243	308704	311496	+	5
TnS000881279g15	TnS000881279g15_novel01	scaffold881279	1083919	1129475	+	10
TnS000479301g02	TnS000479301g02_novel01	scaffold479301	68034	75693	+	9
TnS000279713g15	TnS000279713g15_novel01	scaffold279713	1886482	1892496	-	9
TnS000279713g15	TnS000279713g15_novel02	scaffold279713	1886350	1892175	-	9
TnS000279713g15	TnS000279713g15_novel03	scaffold279713	1886347	1892113	-	9
TnS000279713g15	TnS000279713g15_novel04	scaffold279713	1886347	1892472	-	10
TnS000279713g15	TnS000279713g15_novel05	scaffold279713	1886349	1892280	-	11
TnS000279713g15	TnS000279713g15_novel06	scaffold279713	1886349	1892113	-	8
TnS000252867g05	TnS000252867g05_novel01	scaffold252867	177725	259887	-	24
TnS000090407g01	TnS000090407g01_novel01	scaffold90407	355776	403511	-	24
TnS000090407g01	TnS000090407g01_novel02	scaffold90407	355846	382884	-	19
TnS000971669g03	TnS000971669g03_novel01	scaffold971669	152283	158187	-	7
TnS000121025g04	TnS000121025g04_novel01	scaffold121025	275864	278349	+	1
TnS000918259g02	TnS000918259g02_novel01	scaffold918259	156676	160511	-	2
TnS000452471g02	TnS000452471g02_novel01	scaffold452471	190848	249436	-	3
TnS000481265g10	TnS000481265g10_novel01	scaffold481265	553725	557182	+	1
TnS000481265g10	TnS000481265g10_novel02	scaffold481265	553744	563448	+	7
TnS000071835g06	TnS000071835g06_novel01	scaffold71835	229863	253594	-	13
TnS000071835g06	TnS000071835g06_novel02	scaffold71835	229884	240779	-	12
TnS000111347g03	TnS000111347g03_novel01	scaffold111347	517282	519220	+	1
TnS000921661g01	TnS000921661g01_novel01	scaffold921661	359668	370849	+	6
TnS000018517g03	TnS000018517g03_novel01	scaffold18517	190049	196738	-	11
TnS000018517g03	TnS000018517g03_novel02	scaffold18517	190079	196738	-	11
TnS000018517g03	TnS000018517g03_novel03	scaffold18517	189992	196629	-	11
TnS000018517g03	TnS000018517g03_novel04	scaffold18517	190042	196444	-	11
TnS000018517g03	TnS000018517g03_novel05	scaffold18517	190049	196423	-	11
TnS000172131g01	TnS000172131g01_novel01	scaffold172131	37693	39938	-	3
TnS000769779g03	TnS000769779g03_novel01	scaffold769779	135905	142740	-	8
TnS000769779g03	TnS000769779g03_novel02	scaffold769779	135949	139616	-	5
TnS000751891g01	TnS000751891g01_novel01	scaffold751891	5586	8469	+	9
TnS000015665g02	TnS000015665g02_novel01	scaffold15665	77611	82230	+	5
TnS000015665g02	TnS000015665g02_novel02	scaffold15665	79351	82245	+	3
TnS000253501g07	TnS000253501g07_novel01	scaffold253501	145235	160413	-	7
TnS000401007g04	TnS000401007g04_novel01	scaffold401007	390112	391519	+	1
TnS000629879g05	TnS000629879g05_novel01	scaffold629879	311247	314302	-	1
TnS001029199g01	TnS001029199g01_novel01	scaffold1029199	93466	122887	+	15
TnS000075981g09	TnS000075981g09_novel01	scaffold75981	388428	394159	-	7
TnS000075981g09	TnS000075981g09_novel02	scaffold75981	388582	394114	-	10
TnS000649985g04	TnS000649985g04_novel01	scaffold649985	642017	643919	+	1
TnS000649985g04	TnS000649985g04_novel02	scaffold649985	643357	643908	+	1
TnS000638589g02	TnS000638589g02_novel01	scaffold638589	36357	42508	-	5
TnS000075981g10	TnS000075981g10_novel01	scaffold75981	447889	450635	-	1
TnS000201225g07	TnS000201225g07_novel01	scaffold201225	699975	701890	+	3
TnS000022011g04	TnS000022011g04_novel01	scaffold22011	344387	346850	-	4
TnS000022011g04	TnS000022011g04_novel02	scaffold22011	344392	346386	-	3
TnS000870381g06	TnS000870381g06_novel01	scaffold870381	528760	531529	-	3
TnS000075981g17	TnS000075981g17_novel01	scaffold75981	1496713	1505031	+	10
TnS000045303g01	TnS000045303g01_novel01	scaffold45303	212994	214908	+	1
TnS000180655g01	TnS000180655g01_novel01	scaffold180655	103451	108724	+	8
TnS000180655g01	TnS000180655g01_novel02	scaffold180655	106928	108693	+	3
TnS000671695g02	TnS000671695g02_novel01	scaffold671695	114916	138413	-	9
TnS000199425g01	TnS000199425g01_novel01	scaffold199425	66044	91484	-	15
TnS000946769g01	TnS000946769g01_novel01	scaffold946769	2038	5418	-	3
TnS000811015g12	TnS000811015g12_novel01	scaffold811015	1185072	1201029	-	7
TnS000811015g12	TnS000811015g12_novel02	scaffold811015	1185265	1200825	-	7
TnS000811015g12	TnS000811015g12_novel03	scaffold811015	1185091	1200690	-	8
TnS000770977g01	TnS000770977g01_novel01	scaffold770977	97097	141147	+	23
TnS000770977g01	TnS000770977g01_novel02	scaffold770977	97119	122617	+	15
TnS000911035g15	TnS000911035g15_novel01	scaffold911035	1589635	1603198	-	7
TnS000976055g01	TnS000976055g01_novel01	scaffold976055	25769	28651	+	6
TnS000118101g05	TnS000118101g05_novel01	scaffold118101	351913	357853	-	4
TnS000253293g02	TnS000253293g02_novel01	scaffold253293	96853	100787	+	1
TnS000110159g10	TnS000110159g10_novel01	scaffold110159	963592	965941	-	1
TnS000064825g01	TnS000064825g01_novel01	scaffold64825	205384	207793	+	1
TnS000939231g02	TnS000939231g02_novel01	scaffold939231	244710	272146	+	17
TnS000939231g02	TnS000939231g02_novel02	scaffold939231	244680	249317	+	2
TnS000855955g07	TnS000855955g07_novel01	scaffold855955	787854	811584	-	5
TnS000855955g07	TnS000855955g07_novel02	scaffold855955	787852	811024	-	4
TnS000773353g01	TnS000773353g01_novel01	scaffold773353	57027	62517	+	10
TnS000002531g01	TnS000002531g01_novel01	scaffold2531	44388	45506	+	1
TnS000002531g01	TnS000002531g01_novel02	scaffold2531	44392	45572	+	2
TnS000329077g01	TnS000329077g01_novel01	scaffold329077	9676	12805	+	1
TnS000997321g01	TnS000997321g01_novel01	scaffold997321	22173	26114	-	7
TnS000997321g01	TnS000997321g01_novel02	scaffold997321	22180	22916	-	2
TnS000996827g03	TnS000996827g03_novel01	scaffold996827	314007	320566	+	6
TnS000503395g01	TnS000503395g01_novel01	scaffold503395	24686	27067	+	1
TnS000708575g01	TnS000708575g01_novel01	scaffold708575	122670	124744	+	4
TnS000584749g04	TnS000584749g04_novel01	scaffold584749	482305	485272	-	6
TnS000857049g04	TnS000857049g04_novel01	scaffold857049	250906	255950	-	10
TnS000857049g04	TnS000857049g04_novel02	scaffold857049	250908	255936	-	9
TnS000857049g04	TnS000857049g04_novel03	scaffold857049	251101	254283	-	8
TnS000176247g05	TnS000176247g05_novel01	scaffold176247	127503	144449	+	7
TnS000176247g05	TnS000176247g05_novel02	scaffold176247	127578	144236	+	7
TnS000851043g03	TnS000851043g03_novel01	scaffold851043	147780	166112	+	9
TnS000058127g01	TnS000058127g01_novel01	scaffold58127	58555	60821	-	6
TnS000889661g01	TnS000889661g01_novel01	scaffold889661	149373	154570	-	2
TnS000889661g01	TnS000889661g01_novel02	scaffold889661	148616	154468	-	5
TnS000889661g01	TnS000889661g01_novel03	scaffold889661	150467	153649	-	2
TnS000889661g01	TnS000889661g01_novel04	scaffold889661	150448	153062	-	1
TnS000401131g08	TnS000401131g08_novel01	scaffold401131	530661	540700	-	8
TnS000006461g02	TnS000006461g02_novel01	scaffold6461	145304	146745	+	1
TnS000075981g15	TnS000075981g15_novel01	scaffold75981	1293759	1296971	+	3
TnS000573847g01	TnS000573847g01_novel01	scaffold573847	33101	33801	+	2
TnS000573847g01	TnS000573847g01_novel02	scaffold573847	33124	37853	+	15
TnS000573847g01	TnS000573847g01_novel03	scaffold573847	34992	37906	+	11
TnS000573847g01	TnS000573847g01_novel04	scaffold573847	35588	37904	+	9
TnS000046615g03	TnS000046615g03_novel01	scaffold46615	244413	266338	-	4
TnS000709213g01	TnS000709213g01_novel01	scaffold709213	51740	53529	+	1
TnS000468741g03	TnS000468741g03_novel01	scaffold468741	89365	92760	+	2
TnS000453405g03	TnS000453405g03_novel01	scaffold453405	108319	119903	-	22
TnS000015487g02	TnS000015487g02_novel01	scaffold15487	93589	145000	-	12
TnS000015487g02	TnS000015487g02_novel02	scaffold15487	93519	144434	-	10
TnS000461181g04	TnS000461181g04_novel01	scaffold461181	343359	350797	-	8
TnS000461181g04	TnS000461181g04_novel02	scaffold461181	343138	350101	-	8
TnS000252867g06	TnS000252867g06_novel01	scaffold252867	395666	402627	+	11
TnS000252867g06	TnS000252867g06_novel02	scaffold252867	499772	506821	+	11
TnS000357043g06	TnS000357043g06_novel01	scaffold357043	762491	764260	+	3
TnS001008727g17	TnS001008727g17_novel01	scaffold1008727	1335351	1348027	-	10
TnS001008727g17	TnS001008727g17_novel02	scaffold1008727	1335242	1347249	-	9
TnS001008727g17	TnS001008727g17_novel03	scaffold1008727	1335380	1346041	-	8
TnS000412825g05	TnS000412825g05_novel01	scaffold412825	780395	791481	-	8
TnS000836361g06	TnS000836361g06_novel01	scaffold836361	374126	377288	+	5
TnS000836361g06	TnS000836361g06_novel02	scaffold836361	374099	376997	+	4
TnS000752563g18	TnS000752563g18_novel01	scaffold752563	1478727	1482822	-	3
TnS001021927g06	TnS001021927g06_novel01	scaffold1021927	264380	268190	-	10
TnS000373995g09	TnS000373995g09_novel01	scaffold373995	793399	798967	+	6
TnS000008661g07	TnS000008661g07_novel01	scaffold8661	1346708	1412908	-	8
TnS000008661g07	TnS000008661g07_novel02	scaffold8661	1346634	1399368	-	8
TnS000226197g06	TnS000226197g06_novel01	scaffold226197	767771	768908	+	1
TnS000847245g01	TnS000847245g01_novel01	scaffold847245	31917	34683	+	8
TnS000847245g01	TnS000847245g01_novel02	scaffold847245	32014	34752	+	8
TnS000847245g01	TnS000847245g01_novel03	scaffold847245	32014	34479	+	6
TnS000775079g01	TnS000775079g01_novel01	scaffold775079	30638	33261	+	2
TnS000183359g01	TnS000183359g01_novel01	scaffold183359	53435	55380	+	1
TnS000040667g01	TnS000040667g01_novel01	scaffold40667	1417	3673	-	5
TnS000124723g06	TnS000124723g06_novel01	scaffold124723	455833	467353	+	19
TnS000124723g06	TnS000124723g06_novel02	scaffold124723	463583	467361	+	8
TnS000857275g02	TnS000857275g02_novel01	scaffold857275	117117	120726	+	9
TnS000857275g02	TnS000857275g02_novel02	scaffold857275	119637	121291	+	3
TnS000177737g02	TnS000177737g02_novel01	scaffold177737	64511	67880	-	5
TnS000824839g09	TnS000824839g09_novel01	scaffold824839	980030	983706	-	6
TnS000265611g02	TnS000265611g02_novel01	scaffold265611	90224	96059	+	6
TnS000124043g03	TnS000124043g03_novel01	scaffold124043	259937	327401	+	7
TnS000824675g03	TnS000824675g03_novel01	scaffold824675	295622	300703	+	7
TnS000824675g03	TnS000824675g03_novel02	scaffold824675	296126	300681	+	6
TnS000824675g03	TnS000824675g03_novel03	scaffold824675	298618	300749	+	4
TnS000428321g08	TnS000428321g08_novel01	scaffold428321	1414932	1416475	+	2
TnS000915711g04	TnS000915711g04_novel01	scaffold915711	258082	260451	+	3
TnS000915711g04	TnS000915711g04_novel02	scaffold915711	258342	260453	+	3
TnS000915711g04	TnS000915711g04_novel03	scaffold915711	258406	260343	+	1
TnS000424419g02	TnS000424419g02_novel01	scaffold424419	161607	163278	+	1
TnS001039289g03	TnS001039289g03_novel01	scaffold1039289	324867	326814	+	1
TnS000626343g01	TnS000626343g01_novel01	scaffold626343	132608	144310	+	14
TnS000087717g02	TnS000087717g02_novel01	scaffold87717	5948	35372	-	10
TnS000600351g03	TnS000600351g03_novel01	scaffold600351	112558	173126	+	33
TnS000600351g03	TnS000600351g03_novel02	scaffold600351	112577	173147	+	33
TnS000638589g01	TnS000638589g01_novel01	scaffold638589	14699	16604	+	2
TnS000292707g01	TnS000292707g01_novel01	scaffold292707	2237	27441	+	18
TnS000839235g02	TnS000839235g02_novel01	scaffold839235	55237	151724	-	20
TnS000848219g18	TnS000848219g18_novel01	scaffold848219	996702	1010057	+	18
TnS000848219g18	TnS000848219g18_novel02	scaffold848219	996756	1007156	+	14
TnS000848219g18	TnS000848219g18_novel03	scaffold848219	996757	998566	+	1
TnS000848219g18	TnS000848219g18_novel04	scaffold848219	996757	1003975	+	8
TnS000070333g02	TnS000070333g02_novel01	scaffold70333	26686	83992	-	15
TnS000432943g02	TnS000432943g02_novel01	scaffold432943	87824	93078	-	9
TnS000432943g02	TnS000432943g02_novel02	scaffold432943	87823	92998	-	10
TnS000032567g01	TnS000032567g01_novel01	scaffold32567	11250	13167	-	5
TnS000032567g01	TnS000032567g01_novel02	scaffold32567	11264	12776	-	4
TnS000901763g01	TnS000901763g01_novel01	scaffold901763	93291	95011	-	2
TnS000174697g01	TnS000174697g01_novel01	scaffold174697	387030	389550	+	3
TnS001016115g11	TnS001016115g11_novel01	scaffold1016115	959018	962360	-	5
TnS001016115g11	TnS001016115g11_novel02	scaffold1016115	959227	962321	-	3
TnS000010857g02	TnS000010857g02_novel01	scaffold10857	217295	217894	+	2
TnS000660751g02	TnS000660751g02_novel01	scaffold660751	306790	309900	+	12
TnS000544263g08	TnS000544263g08_novel01	scaffold544263	474346	476417	-	5
TnS001016819g01	TnS001016819g01_novel01	scaffold1016819	64648	77538	+	5
TnS000765213g10	TnS000765213g10_novel01	scaffold765213	1006133	1012534	+	6
TnS000765213g10	TnS000765213g10_novel02	scaffold765213	1006133	1012385	+	7
TnS000765213g10	TnS000765213g10_novel03	scaffold765213	1006133	1012440	+	5
TnS000765213g10	TnS000765213g10_novel04	scaffold765213	1006133	1012923	+	7
TnS000765213g10	TnS000765213g10_novel05	scaffold765213	1007598	1012343	+	5
TnS000765213g10	TnS000765213g10_novel06	scaffold765213	1008493	1012439	+	1
TnS000765213g10	TnS000765213g10_novel07	scaffold765213	1008650	1012360	+	1
TnS000765213g10	TnS000765213g10_novel08	scaffold765213	1008955	1012450	+	1
TnS000918259g03	TnS000918259g03_novel01	scaffold918259	282208	343132	+	7
TnS000323239g01	TnS000323239g01_novel01	scaffold323239	19982	21885	-	2
TnS000323239g01	TnS000323239g01_novel02	scaffold323239	19658	21315	-	1
TnS000086753g04	TnS000086753g04_novel01	scaffold86753	368949	393273	+	12
TnS000684327g07	TnS000684327g07_novel01	scaffold684327	489941	493397	+	9
TnS000684327g07	TnS000684327g07_novel02	scaffold684327	491227	493357	+	6
TnS000119819g02	TnS000119819g02_novel01	scaffold119819	592907	603495	-	8
TnS000939005g01	TnS000939005g01_novel01	scaffold939005	3382	9907	+	8
TnS000021337g04	TnS000021337g04_novel01	scaffold21337	738627	800064	+	21
TnS000021337g04	TnS000021337g04_novel02	scaffold21337	782837	800246	+	5
TnS000960873g05	TnS000960873g05_novel01	scaffold960873	572870	594386	-	6
TnS000182753g01	TnS000182753g01_novel01	scaffold182753	72855	76232	+	2
TnS001038517g02	TnS001038517g02_novel01	scaffold1038517	135156	139203	+	6
TnS001038517g02	TnS001038517g02_novel02	scaffold1038517	135573	139090	+	7
TnS000994443g04	TnS000994443g04_novel01	scaffold994443	363233	367882	+	2
TnS000857305g01	TnS000857305g01_novel01	scaffold857305	10035	11371	-	3
TnS000424419g01	TnS000424419g01_novel01	scaffold424419	8869	11926	+	3
TnS000785057g06	TnS000785057g06_novel01	scaffold785057	1130405	1131537	-	1
TnS000908817g02	TnS000908817g02_novel01	scaffold908817	316935	392100	+	10
TnS000193939g03	TnS000193939g03_novel01	scaffold193939	137467	140923	-	2
TnS000193939g03	TnS000193939g03_novel02	scaffold193939	137591	139241	-	1
TnS000751585g02	TnS000751585g02_novel01	scaffold751585	205086	220685	-	13
TnS000751585g02	TnS000751585g02_novel02	scaffold751585	205173	220641	-	14
TnS000093481g05	TnS000093481g05_novel01	scaffold93481	362461	364557	+	4
TnS000095137g15	TnS000095137g15_novel01	scaffold95137	1066158	1086419	-	7
TnS000087807g01	TnS000087807g01_novel01	scaffold87807	188975	195857	-	4
TnS000914191g03	TnS000914191g03_novel01	scaffold914191	450351	455506	+	17
TnS000914191g03	TnS000914191g03_novel02	scaffold914191	450737	455450	+	16
TnS000450223g02	TnS000450223g02_novel01	scaffold450223	332956	336503	-	2
TnS000816469g01	TnS000816469g01_novel01	scaffold816469	190290	236963	-	3
TnS000767285g01	TnS000767285g01_novel01	scaffold767285	91578	93142	-	1
TnS000002575g06	TnS000002575g06_novel01	scaffold2575	512708	515032	-	10
TnS000555441g02	TnS000555441g02_novel01	scaffold555441	230350	253857	-	11
TnS001040023g01	TnS001040023g01_novel01	scaffold1040023	45130	58205	-	5
TnS000962589g02	TnS000962589g02_novel01	scaffold962589	26404	32340	-	13
TnS000962589g02	TnS000962589g02_novel02	scaffold962589	27461	32340	-	12
TnS000723435g14	TnS000723435g14_novel01	scaffold723435	2914118	2920266	-	6
TnS000299765g04	TnS000299765g04_novel01	scaffold299765	359824	363471	-	5
TnS000817183g13	TnS000817183g13_novel01	scaffold817183	772473	775191	-	2
TnS000060573g05	TnS000060573g05_novel01	scaffold60573	436107	451265	+	6
TnS000735819g01	TnS000735819g01_novel01	scaffold735819	69745	74106	+	10
TnS000735819g01	TnS000735819g01_novel02	scaffold735819	73239	74054	+	2
TnS000609043g04	TnS000609043g04_novel01	scaffold609043	182705	208229	-	17
TnS000993127g01	TnS000993127g01_novel01	scaffold993127	198285	202836	-	3
TnS000993127g01	TnS000993127g01_novel02	scaffold993127	198012	202542	-	3
TnS000940011g01	TnS000940011g01_novel01	scaffold940011	73018	73858	-	2
TnS000533047g07	TnS000533047g07_novel01	scaffold533047	542466	564165	-	9
TnS000594683g01	TnS000594683g01_novel01	scaffold594683	32611	35253	-	7
TnS000718889g01	TnS000718889g01_novel01	scaffold718889	6153	12084	+	12
TnS000207955g03	TnS000207955g03_novel01	scaffold207955	312685	315806	-	7
TnS000546833g05	TnS000546833g05_novel01	scaffold546833	451187	454347	+	7
TnS000177943g03	TnS000177943g03_novel01	scaffold177943	362002	371775	-	5
TnS001026745g01	TnS001026745g01_novel01	scaffold1026745	4001	4962	+	2
TnS000936593g06	TnS000936593g06_novel01	scaffold936593	517452	520007	-	4
TnS000972139g01	TnS000972139g01_novel01	scaffold972139	20061	27676	-	17
TnS000047801g03	TnS000047801g03_novel01	scaffold47801	161000	163104	+	6
TnS000047801g03	TnS000047801g03_novel02	scaffold47801	161000	165343	+	13
TnS000436783g08	TnS000436783g08_novel01	scaffold436783	393590	408316	-	9
TnS000390199g01	TnS000390199g01_novel01	scaffold390199	16296	20877	+	8
TnS000390199g01	TnS000390199g01_novel02	scaffold390199	21111	34491	+	7
TnS000773353g02	TnS000773353g02_novel01	scaffold773353	156361	207784	+	45
TnS000773353g02	TnS000773353g02_novel02	scaffold773353	181698	207965	+	27
TnS000773353g02	TnS000773353g02_novel03	scaffold773353	188341	207957	+	14
TnS000494055g02	TnS000494055g02_novel01	scaffold494055	187479	190348	-	5
TnS000494055g02	TnS000494055g02_novel02	scaffold494055	187461	190334	-	6
TnS001009357g02	TnS001009357g02_novel01	scaffold1009357	144055	149070	+	1
TnS000784981g08	TnS000784981g08_novel01	scaffold784981	408549	409598	-	1
TnS001033115g01	TnS001033115g01_novel01	scaffold1033115	458956	461832	+	4
TnS001033115g01	TnS001033115g01_novel02	scaffold1033115	459091	461749	+	3
TnS001033115g01	TnS001033115g01_novel03	scaffold1033115	459183	461803	+	1
TnS000325949g01	TnS000325949g01_novel01	scaffold325949	7653	20511	+	14
TnS000529633g02	TnS000529633g02_novel01	scaffold529633	171739	177420	+	5
TnS000031311g01	TnS000031311g01_novel01	scaffold31311	125967	126919	-	1
TnS000828859g02	TnS000828859g02_novel01	scaffold828859	69391	74026	+	6
TnS000480009g01	TnS000480009g01_novel01	scaffold480009	160059	163188	-	5
TnS000824839g20	TnS000824839g20_novel01	scaffold824839	2070180	2072126	+	1
TnS000824839g20	TnS000824839g20_novel02	scaffold824839	2070213	2081746	+	11
TnS000047601g05	TnS000047601g05_novel01	scaffold47601	166219	177862	+	14
TnS000047601g05	TnS000047601g05_novel02	scaffold47601	169797	177864	+	11
TnS000370427g07	TnS000370427g07_novel01	scaffold370427	663403	666651	-	8
TnS000068155g01	TnS000068155g01_novel01	scaffold68155	173205	237845	+	37
TnS000068155g01	TnS000068155g01_novel02	scaffold68155	173229	212914	+	24
TnS000068155g01	TnS000068155g01_novel03	scaffold68155	175438	237869	+	36
TnS000068155g01	TnS000068155g01_novel04	scaffold68155	200472	237870	+	21
TnS000068155g01	TnS000068155g01_novel05	scaffold68155	223632	237571	+	10
TnS000414359g02	TnS000414359g02_novel01	scaffold414359	86984	95764	-	9
TnS000427783g24	TnS000427783g24_novel01	scaffold427783	3081392	3083280	+	2
TnS000827741g05	TnS000827741g05_novel01	scaffold827741	310138	312960	-	1
TnS000665285g01	TnS000665285g01_novel01	scaffold665285	4362	6713	+	6
TnS000695019g02	TnS000695019g02_novel01	scaffold695019	700832	711154	-	13
TnS000989323g03	TnS000989323g03_novel01	scaffold989323	373755	386910	-	5
TnS000498063g20	TnS000498063g20_novel01	scaffold498063	2081484	2084611	-	3
TnS000954133g04	TnS000954133g04_novel01	scaffold954133	287408	290247	-	4
TnS000921481g02	TnS000921481g02_novel01	scaffold921481	173251	211533	+	10
TnS000921481g02	TnS000921481g02_novel02	scaffold921481	180856	191871	+	3
TnS000218137g01	TnS000218137g01_novel01	scaffold218137	171586	177241	+	6
TnS000875155g06	TnS000875155g06_novel01	scaffold875155	377646	423926	-	28
TnS000213501g02	TnS000213501g02_novel01	scaffold213501	108589	119737	-	8
TnS000035887g03	TnS000035887g03_novel01	scaffold35887	158018	161216	-	6
TnS000130635g03	TnS000130635g03_novel01	scaffold130635	262855	269626	+	9
TnS000354929g04	TnS000354929g04_novel01	scaffold354929	593586	595594	-	6
TnS000957825g06	TnS000957825g06_novel01	scaffold957825	222798	227133	+	8
TnS000957825g06	TnS000957825g06_novel02	scaffold957825	222798	227246	+	7
TnS000957825g06	TnS000957825g06_novel03	scaffold957825	222799	227221	+	7
TnS000957825g06	TnS000957825g06_novel04	scaffold957825	222809	227315	+	7
TnS000986409g01	TnS000986409g01_novel01	scaffold986409	21087	99561	-	10
TnS000877399g22	TnS000877399g22_novel01	scaffold877399	2780080	2791507	-	11
TnS000877399g22	TnS000877399g22_novel02	scaffold877399	2780111	2791475	-	12
TnS000945273g08	TnS000945273g08_novel01	scaffold945273	305002	309022	-	6
TnS000658757g01	TnS000658757g01_novel01	scaffold658757	169136	173354	+	5
TnS000998553g02	TnS000998553g02_novel01	scaffold998553	27588	29371	+	5
TnS000603761g01	TnS000603761g01_novel01	scaffold603761	349304	381750	+	16
TnS000980175g03	TnS000980175g03_novel01	scaffold980175	468876	471794	-	6
TnS000980175g03	TnS000980175g03_novel02	scaffold980175	449804	470460	-	6
TnS000708831g01	TnS000708831g01_novel01	scaffold708831	11549	12567	+	1
TnS000397783g01	TnS000397783g01_novel01	scaffold397783	9825	14377	-	7
TnS000540273g07	TnS000540273g07_novel01	scaffold540273	571233	575285	-	7
TnS000442331g01	TnS000442331g01_novel01	scaffold442331	3564	5865	+	5
TnS000237579g01	TnS000237579g01_novel01	scaffold237579	9857	14739	-	9
TnS000237579g01	TnS000237579g01_novel02	scaffold237579	9650	14735	-	7
TnS000237579g01	TnS000237579g01_novel03	scaffold237579	9790	11363	-	2
TnS000826449g05	TnS000826449g05_novel01	scaffold826449	232731	249740	+	12
TnS000826449g05	TnS000826449g05_novel02	scaffold826449	232761	249701	+	13
TnS000826449g05	TnS000826449g05_novel03	scaffold826449	232870	249722	+	13
TnS000146153g06	TnS000146153g06_novel01	scaffold146153	1048258	1051331	+	3
TnS000146153g06	TnS000146153g06_novel02	scaffold146153	1048345	1051397	+	2
TnS000146153g06	TnS000146153g06_novel03	scaffold146153	1048416	1051398	+	1
TnS000146153g06	TnS000146153g06_novel04	scaffold146153	1051108	1051397	+	1
TnS000070227g09	TnS000070227g09_novel01	scaffold70227	711386	718634	-	13
TnS000042319g04	TnS000042319g04_novel01	scaffold42319	649974	653870	-	2
TnS000042319g04	TnS000042319g04_novel02	scaffold42319	649977	653379	-	1
TnS000422063g01	TnS000422063g01_novel01	scaffold422063	50593	53675	+	3
TnS000422063g01	TnS000422063g01_novel02	scaffold422063	50600	78034	+	9
TnS000035493g10	TnS000035493g10_novel01	scaffold35493	793761	888443	-	12
TnS000035493g10	TnS000035493g10_novel02	scaffold35493	879808	888330	-	9
TnS000035493g10	TnS000035493g10_novel03	scaffold35493	793778	802427	-	13
TnS000035493g10	TnS000035493g10_novel04	scaffold35493	793789	794547	-	2
TnS000136271g03	TnS000136271g03_novel01	scaffold136271	138753	142292	+	8
TnS000791397g01	TnS000791397g01_novel01	scaffold791397	89860	100102	+	7
TnS000877217g01	TnS000877217g01_novel01	scaffold877217	10544	12623	+	4
TnS000529593g01	TnS000529593g01_novel01	scaffold529593	17344	21033	-	2
TnS000480543g06	TnS000480543g06_novel01	scaffold480543	554750	558561	+	6
TnS000996827g04	TnS000996827g04_novel01	scaffold996827	549473	551039	+	2
TnS000388611g01	TnS000388611g01_novel01	scaffold388611	30861	33176	+	5
TnS000388611g01	TnS000388611g01_novel02	scaffold388611	30862	33240	+	6
TnS000388611g01	TnS000388611g01_novel03	scaffold388611	30872	33448	+	5
TnS000388611g01	TnS000388611g01_novel04	scaffold388611	30862	33176	+	5
TnS000388611g01	TnS000388611g01_novel05	scaffold388611	30862	33452	+	5
TnS000388611g01	TnS000388611g01_novel06	scaffold388611	30933	33438	+	5
TnS000628329g01	TnS000628329g01_novel01	scaffold628329	356419	358896	+	3
TnS000225445g02	TnS000225445g02_novel01	scaffold225445	232135	234499	+	4
TnS000655273g02	TnS000655273g02_novel01	scaffold655273	70233	75131	+	3
TnS000983995g01	TnS000983995g01_novel01	scaffold983995	17417	21169	+	8
TnS000983995g01	TnS000983995g01_novel02	scaffold983995	17417	21171	+	7
TnS000510917g02	TnS000510917g02_novel01	scaffold510917	164634	235509	-	14
TnS000510917g02	TnS000510917g02_novel02	scaffold510917	164632	202910	-	9
TnS000091781g07	TnS000091781g07_novel01	scaffold91781	263998	265987	+	2
TnS000644423g05	TnS000644423g05_novel01	scaffold644423	323917	330092	+	6
TnS000641359g01	TnS000641359g01_novel01	scaffold641359	22861	64230	+	4
TnS000153841g02	TnS000153841g02_novel01	scaffold153841	228783	233516	-	2
TnS000692159g08	TnS000692159g08_novel01	scaffold692159	605247	610129	+	9
TnS000692159g08	TnS000692159g08_novel02	scaffold692159	608661	609951	+	3
TnS001016959g01	TnS001016959g01_novel01	scaffold1016959	5297	9081	-	5
TnS001016959g01	TnS001016959g01_novel02	scaffold1016959	5361	9080	-	5
TnS001016959g01	TnS001016959g01_novel03	scaffold1016959	5322	9051	-	5
TnS001016959g01	TnS001016959g01_novel04	scaffold1016959	5298	9010	-	6
TnS000191245g06	TnS000191245g06_novel01	scaffold191245	386220	387525	-	1
TnS000693881g02	TnS000693881g02_novel01	scaffold693881	315603	318017	+	3
TnS000693881g02	TnS000693881g02_novel02	scaffold693881	315748	317958	+	2
TnS000743821g01	TnS000743821g01_novel01	scaffold743821	10198	17299	-	11
TnS000762467g02	TnS000762467g02_novel01	scaffold762467	58479	74950	-	21
TnS000618501g01	TnS000618501g01_novel01	scaffold618501	88260	91438	-	6
TnS000218409g03	TnS000218409g03_novel01	scaffold218409	493371	498932	-	12
TnS000706383g04	TnS000706383g04_novel01	scaffold706383	491687	496527	-	4
TnS000706383g04	TnS000706383g04_novel02	scaffold706383	491769	496442	-	3
TnS000215639g04	TnS000215639g04_novel01	scaffold215639	372102	373649	-	1
TnS000035887g01	TnS000035887g01_novel01	scaffold35887	32114	47358	+	9
TnS000810771g02	TnS000810771g02_novel01	scaffold810771	153333	155476	+	2
TnS000291455g08	TnS000291455g08_novel01	scaffold291455	632332	638144	+	12
TnS000371983g07	TnS000371983g07_novel01	scaffold371983	419850	428516	-	15
TnS000371983g07	TnS000371983g07_novel02	scaffold371983	418177	423717	-	20
TnS000371983g07	TnS000371983g07_novel03	scaffold371983	418177	422307	-	15
TnS000615653g22	TnS000615653g22_novel01	scaffold615653	3601310	3604359	-	6
TnS000182335g04	TnS000182335g04_novel01	scaffold182335	690990	694089	+	2
TnS000182335g04	TnS000182335g04_novel02	scaffold182335	691053	694069	+	1
TnS000055435g07	TnS000055435g07_novel01	scaffold55435	523853	526579	+	5
TnS000055435g07	TnS000055435g07_novel02	scaffold55435	523929	534642	+	7
TnS000254899g01	TnS000254899g01_novel01	scaffold254899	29630	34072	+	2
TnS000254899g01	TnS000254899g01_novel02	scaffold254899	50589	52704	+	1
TnS000072889g01	TnS000072889g01_novel01	scaffold72889	76075	81962	-	11
TnS000498745g02	TnS000498745g02_novel01	scaffold498745	152258	153930	-	3
TnS000498745g02	TnS000498745g02_novel02	scaffold498745	152264	153926	-	3
TnS000170537g04	TnS000170537g04_novel01	scaffold170537	192255	196963	-	8
TnS000926507g05	TnS000926507g05_novel01	scaffold926507	133304	136446	-	4
TnS000160869g03	TnS000160869g03_novel01	scaffold160869	400796	402243	-	4
TnS000047601g01	TnS000047601g01_novel01	scaffold47601	10996	31289	+	14
TnS000478477g08	TnS000478477g08_novel01	scaffold478477	750923	753588	-	4
TnS000722173g03	TnS000722173g03_novel01	scaffold722173	179226	180874	-	3
TnS000588755g02	TnS000588755g02_novel01	scaffold588755	115741	122784	-	3
TnS000588755g02	TnS000588755g02_novel02	scaffold588755	107279	122715	-	10
TnS000588755g02	TnS000588755g02_novel03	scaffold588755	113756	115065	-	1
TnS000166101g06	TnS000166101g06_novel01	scaffold166101	243125	246118	+	1
TnS000166101g06	TnS000166101g06_novel02	scaffold166101	244720	246080	+	1
TnS000166101g06	TnS000166101g06_novel03	scaffold166101	245470	246675	+	1
TnS000440349g04	TnS000440349g04_novel01	scaffold440349	584450	592915	+	5
TnS000493429g01	TnS000493429g01_novel01	scaffold493429	201280	208754	-	3
TnS000493429g01	TnS000493429g01_novel02	scaffold493429	201462	208691	-	4
TnS000553213g01	TnS000553213g01_novel01	scaffold553213	83073	96569	+	7
TnS000134049g06	TnS000134049g06_novel01	scaffold134049	313120	331137	-	16
TnS000134049g06	TnS000134049g06_novel02	scaffold134049	313125	328999	-	14
TnS000134049g06	TnS000134049g06_novel03	scaffold134049	313429	328103	-	12
TnS000923949g15	TnS000923949g15_novel01	scaffold923949	1624095	1627549	+	7
TnS000906529g01	TnS000906529g01_novel01	scaffold906529	9982	12204	+	6
TnS000096835g02	TnS000096835g02_novel01	scaffold96835	897967	899321	+	1
TnS000096835g02	TnS000096835g02_novel02	scaffold96835	898485	899514	+	1
TnS000355969g01	TnS000355969g01_novel01	scaffold355969	19362	86100	+	8
TnS000389281g03	TnS000389281g03_novel01	scaffold389281	320808	324076	-	7
TnS000389281g03	TnS000389281g03_novel02	scaffold389281	320846	324182	-	4
TnS000389281g03	TnS000389281g03_novel03	scaffold389281	320846	324125	-	8
TnS000364023g01	TnS000364023g01_novel01	scaffold364023	1571	7030	-	15
TnS000364023g01	TnS000364023g01_novel02	scaffold364023	1573	6241	-	14
TnS000583159g10	TnS000583159g10_novel01	scaffold583159	659876	662702	+	1
TnS000583159g10	TnS000583159g10_novel02	scaffold583159	659876	692848	+	4
TnS000902409g02	TnS000902409g02_novel01	scaffold902409	325104	328555	+	8
TnS000802287g02	TnS000802287g02_novel01	scaffold802287	109677	112721	-	7
TnS000802287g02	TnS000802287g02_novel02	scaffold802287	109630	112680	-	8
TnS000802287g02	TnS000802287g02_novel03	scaffold802287	109647	112680	-	3
TnS000166611g01	TnS000166611g01_novel01	scaffold166611	43430	44191	+	2
TnS000097109g33	TnS000097109g33_novel01	scaffold97109	2693681	2697119	+	1
TnS000097109g33	TnS000097109g33_novel02	scaffold97109	2693788	2697098	+	2
TnS000097109g33	TnS000097109g33_novel03	scaffold97109	2695040	2697105	+	2
TnS001041249g01	TnS001041249g01_novel01	scaffold1041249	81333	82554	-	2
TnS000709893g01	TnS000709893g01_novel01	scaffold709893	355916	361949	-	3
TnS000066331g13	TnS000066331g13_novel01	scaffold66331	868521	893361	+	11
TnS000066331g13	TnS000066331g13_novel02	scaffold66331	868547	893346	+	11
TnS000066331g13	TnS000066331g13_novel03	scaffold66331	868540	891885	+	9
TnS000066331g13	TnS000066331g13_novel04	scaffold66331	868550	893367	+	10
TnS000066331g13	TnS000066331g13_novel05	scaffold66331	869714	893368	+	9
TnS000066331g13	TnS000066331g13_novel06	scaffold66331	874709	893361	+	8
TnS000097785g04	TnS000097785g04_novel01	scaffold97785	209295	214590	+	6
TnS000414359g01	TnS000414359g01_novel01	scaffold414359	44813	62543	+	5
TnS000938315g06	TnS000938315g06_novel01	scaffold938315	722410	723538	+	1
TnS000357211g03	TnS000357211g03_novel01	scaffold357211	322446	329663	-	10
TnS000357211g03	TnS000357211g03_novel02	scaffold357211	330890	338027	-	10
TnS000832069g10	TnS000832069g10_novel01	scaffold832069	395113	399438	+	3
TnS000135743g01	TnS000135743g01_novel01	scaffold135743	159143	172182	+	10
TnS000009855g05	TnS000009855g05_novel01	scaffold9855	554428	558564	-	3
TnS000009855g05	TnS000009855g05_novel02	scaffold9855	552959	554632	-	3
TnS000255845g05	TnS000255845g05_novel01	scaffold255845	204010	229277	+	11
TnS000255845g05	TnS000255845g05_novel02	scaffold255845	204096	229231	+	10
TnS000801895g01	TnS000801895g01_novel01	scaffold801895	61954	71179	+	4
TnS000801895g01	TnS000801895g01_novel02	scaffold801895	62030	78738	+	7
TnS000801895g01	TnS000801895g01_novel03	scaffold801895	75444	77193	+	2
TnS000322161g10	TnS000322161g10_novel01	scaffold322161	523100	527042	+	7
TnS000322161g10	TnS000322161g10_novel02	scaffold322161	523102	526918	+	7
TnS000322161g10	TnS000322161g10_novel03	scaffold322161	523102	526909	+	6
TnS000322161g10	TnS000322161g10_novel04	scaffold322161	523102	526955	+	9
TnS000322161g10	TnS000322161g10_novel05	scaffold322161	523103	526864	+	8
TnS000322161g10	TnS000322161g10_novel06	scaffold322161	523106	526320	+	6
TnS000133393g01	TnS000133393g01_novel01	scaffold133393	50480	66922	+	14
TnS000626283g04	TnS000626283g04_novel01	scaffold626283	50860	61562	-	13
TnS000626283g04	TnS000626283g04_novel02	scaffold626283	52887	61453	-	11
TnS000202953g01	TnS000202953g01_novel01	scaffold202953	187463	193870	+	7
TnS000377993g01	TnS000377993g01_novel01	scaffold377993	37279	37655	+	1
TnS000047601g03	TnS000047601g03_novel01	scaffold47601	59231	63957	+	13
TnS000047601g03	TnS000047601g03_novel02	scaffold47601	59721	63894	+	12
TnS000079321g02	TnS000079321g02_novel01	scaffold79321	44629	47370	-	7
TnS000879301g03	TnS000879301g03_novel01	scaffold879301	346935	351878	+	7
TnS000615439g05	TnS000615439g05_novel01	scaffold615439	166309	166609	-	1
TnS000598867g03	TnS000598867g03_novel01	scaffold598867	89119	126578	-	10
TnS000875963g06	TnS000875963g06_novel01	scaffold875963	346816	359982	+	7
TnS000132307g06	TnS000132307g06_novel01	scaffold132307	856350	859147	+	6
TnS000005079g01	TnS000005079g01_novel01	scaffold5079	15663	18009	+	2
TnS000417463g04	TnS000417463g04_novel01	scaffold417463	258118	260360	+	6
TnS000986425g02	TnS000986425g02_novel01	scaffold986425	34031	36762	-	3
TnS000820667g11	TnS000820667g11_novel01	scaffold820667	1774689	1777353	-	2
TnS000700681g07	TnS000700681g07_novel01	scaffold700681	970877	983070	+	12
TnS000142979g05	TnS000142979g05_novel01	scaffold142979	477787	484008	+	9
TnS000031161g04	TnS000031161g04_novel01	scaffold31161	498569	501384	+	5
TnS000444925g02	TnS000444925g02_novel01	scaffold444925	181838	184665	-	2
TnS000409601g02	TnS000409601g02_novel01	scaffold409601	530366	531773	-	2
TnS000145253g07	TnS000145253g07_novel01	scaffold145253	338408	350249	+	23
TnS000084833g04	TnS000084833g04_novel01	scaffold84833	399386	425735	-	5
TnS000084833g04	TnS000084833g04_novel02	scaffold84833	423372	425497	-	1
TnS000490421g02	TnS000490421g02_novel01	scaffold490421	169589	170109	+	1
TnS000304669g01	TnS000304669g01_novel01	scaffold304669	11287	13008	-	3
TnS000577547g24	TnS000577547g24_novel01	scaffold577547	1216618	1223803	+	10
TnS000919321g02	TnS000919321g02_novel01	scaffold919321	46806	47202	-	1
TnS001032017g01	TnS001032017g01_novel01	scaffold1032017	3498	6319	+	6
TnS000420067g03	TnS000420067g03_novel01	scaffold420067	61486	74556	-	12
TnS000984855g07	TnS000984855g07_novel01	scaffold984855	440247	445456	-	12
TnS000662943g02	TnS000662943g02_novel01	scaffold662943	296208	328102	+	20
TnS000086967g01	TnS000086967g01_novel01	scaffold86967	20386	27317	-	5
TnS000502355g01	TnS000502355g01_novel01	scaffold502355	70411	77008	-	6
TnS000164933g02	TnS000164933g02_novel01	scaffold164933	85712	87265	-	3
TnS001002557g09	TnS001002557g09_novel01	scaffold1002557	595886	598435	-	4
TnS000207911g02	TnS000207911g02_novel01	scaffold207911	119541	123363	-	5
TnS000688411g14	TnS000688411g14_novel01	scaffold688411	968782	971118	-	2
TnS000688411g14	TnS000688411g14_novel02	scaffold688411	968977	971118	-	2
TnS000750281g01	TnS000750281g01_novel01	scaffold750281	9470	15484	+	9
TnS000948767g06	TnS000948767g06_novel01	scaffold948767	822630	827860	+	2
TnS000948767g06	TnS000948767g06_novel02	scaffold948767	826257	827860	+	1
TnS000172145g05	TnS000172145g05_novel01	scaffold172145	265275	274607	+	13
TnS000172145g05	TnS000172145g05_novel02	scaffold172145	265391	274581	+	13
TnS000172145g05	TnS000172145g05_novel03	scaffold172145	265383	274641	+	14
TnS000172145g05	TnS000172145g05_novel04	scaffold172145	265391	274650	+	14
TnS000172145g05	TnS000172145g05_novel05	scaffold172145	265414	274611	+	14
TnS000172145g05	TnS000172145g05_novel06	scaffold172145	270417	274650	+	8
TnS001023583g01	TnS001023583g01_novel01	scaffold1023583	157407	159712	+	2
TnS000096033g11	TnS000096033g11_novel01	scaffold96033	764068	770072	-	8
TnS000832841g02	TnS000832841g02_novel01	scaffold832841	290751	296188	+	10
TnS000832841g02	TnS000832841g02_novel02	scaffold832841	290794	296138	+	10
TnS000706367g01	TnS000706367g01_novel01	scaffold706367	141955	167615	-	7
TnS000461511g12	TnS000461511g12_novel01	scaffold461511	1167969	1180956	+	12
TnS000461511g12	TnS000461511g12_novel02	scaffold461511	1168141	1180968	+	9
TnS000461511g12	TnS000461511g12_novel03	scaffold461511	1168157	1181005	+	11
TnS000461511g12	TnS000461511g12_novel04	scaffold461511	1168189	1180968	+	11
TnS000277945g02	TnS000277945g02_novel01	scaffold277945	104811	122886	-	6
TnS000113989g04	TnS000113989g04_novel01	scaffold113989	374993	379265	-	5
TnS000986373g01	TnS000986373g01_novel01	scaffold986373	88828	91534	+	3
TnS000800343g10	TnS000800343g10_novel01	scaffold800343	1555557	1561214	+	6
TnS000800343g10	TnS000800343g10_novel02	scaffold800343	1555565	1561173	+	5
TnS000800343g10	TnS000800343g10_novel03	scaffold800343	1555570	1561216	+	7
TnS000800343g10	TnS000800343g10_novel04	scaffold800343	1555619	1561024	+	7
TnS000800343g10	TnS000800343g10_novel05	scaffold800343	1558909	1561029	+	2
TnS001021201g01	TnS001021201g01_novel01	scaffold1021201	170657	189688	-	12
TnS000872937g04	TnS000872937g04_novel01	scaffold872937	186055	192694	-	4
TnS000967315g05	TnS000967315g05_novel01	scaffold967315	546781	548668	+	3
TnS000490421g08	TnS000490421g08_novel01	scaffold490421	411338	423735	-	7
TnS000645087g02	TnS000645087g02_novel01	scaffold645087	125569	128525	-	4
TnS000645087g02	TnS000645087g02_novel02	scaffold645087	125583	127121	-	2
TnS000146367g04	TnS000146367g04_novel01	scaffold146367	661531	663550	+	2
TnS000146367g04	TnS000146367g04_novel02	scaffold146367	661996	663542	+	1
TnS000297983g05	TnS000297983g05_novel01	scaffold297983	486154	488266	-	5
TnS000736459g01	TnS000736459g01_novel01	scaffold736459	1	756	+	1
TnS000711969g02	TnS000711969g02_novel01	scaffold711969	109228	110148	+	1
TnS000638025g03	TnS000638025g03_novel01	scaffold638025	171149	235271	-	20
TnS000029049g03	TnS000029049g03_novel01	scaffold29049	144795	149341	+	5
TnS000045303g02	TnS000045303g02_novel01	scaffold45303	367326	368707	+	1
TnS000875001g01	TnS000875001g01_novel01	scaffold875001	3996	5671	-	3
TnS000840713g01	TnS000840713g01_novel01	scaffold840713	141435	145886	+	4
TnS000778831g02	TnS000778831g02_novel01	scaffold778831	78399	80476	+	5
TnS000778831g02	TnS000778831g02_novel02	scaffold778831	78401	80476	+	2
TnS000778831g02	TnS000778831g02_novel03	scaffold778831	79744	82434	+	6
TnS000506453g03	TnS000506453g03_novel01	scaffold506453	189907	194149	+	10
TnS000678907g03	TnS000678907g03_novel01	scaffold678907	54927	58188	+	2
TnS000897855g07	TnS000897855g07_novel01	scaffold897855	415085	424398	-	6
TnS000871525g02	TnS000871525g02_novel01	scaffold871525	51661	53994	+	1
TnS000970257g01	TnS000970257g01_novel01	scaffold970257	23607	29819	-	14
TnS000970257g01	TnS000970257g01_novel02	scaffold970257	22406	25085	-	8
TnS000970257g01	TnS000970257g01_novel03	scaffold970257	22264	23839	-	4
TnS000485415g01	TnS000485415g01_novel01	scaffold485415	18919	29531	+	33
TnS000485415g01	TnS000485415g01_novel02	scaffold485415	23689	29545	+	19
TnS000950953g06	TnS000950953g06_novel01	scaffold950953	240384	242505	+	5
TnS000139427g05	TnS000139427g05_novel01	scaffold139427	227560	230827	-	5
TnS000139427g05	TnS000139427g05_novel02	scaffold139427	227380	230771	-	5
TnS000139427g05	TnS000139427g05_novel03	scaffold139427	252563	255568	-	5
TnS000139427g05	TnS000139427g05_novel04	scaffold139427	255216	255513	-	1
TnS000722979g01	TnS000722979g01_novel01	scaffold722979	2741	5255	-	4
TnS000450229g03	TnS000450229g03_novel01	scaffold450229	63033	69322	-	3
TnS001022251g02	TnS001022251g02_novel01	scaffold1022251	173384	181279	+	12
TnS001022251g02	TnS001022251g02_novel02	scaffold1022251	175234	181293	+	10
TnS000808237g02	TnS000808237g02_novel01	scaffold808237	190358	194339	+	2
TnS000284473g05	TnS000284473g05_novel01	scaffold284473	408427	432174	-	10
TnS000954725g02	TnS000954725g02_novel01	scaffold954725	45843	51646	+	3
TnS000044313g03	TnS000044313g03_novel01	scaffold44313	316984	321672	+	3
TnS000044313g03	TnS000044313g03_novel02	scaffold44313	316988	323006	+	7
TnS000821831g01	TnS000821831g01_novel01	scaffold821831	44383	46720	-	3
TnS000274247g01	TnS000274247g01_novel01	scaffold274247	3861	7169	+	10
TnS000318695g01	TnS000318695g01_novel01	scaffold318695	73709	92867	-	14
TnS001039451g01	TnS001039451g01_novel01	scaffold1039451	33223	35360	+	6
TnS001039363g10	TnS001039363g10_novel01	scaffold1039363	1353713	1372609	+	8
TnS001039363g10	TnS001039363g10_novel02	scaffold1039363	1353783	1372559	+	8
TnS001039363g10	TnS001039363g10_novel03	scaffold1039363	1353811	1357611	+	1
TnS001039363g10	TnS001039363g10_novel04	scaffold1039363	1358116	1359777	+	1
TnS000031243g01	TnS000031243g01_novel01	scaffold31243	12512	15849	+	3
TnS000031243g01	TnS000031243g01_novel02	scaffold31243	12512	15719	+	3
TnS000031243g01	TnS000031243g01_novel03	scaffold31243	12811	15686	+	2
TnS000031243g01	TnS000031243g01_novel04	scaffold31243	14030	15825	+	1
TnS000035489g01	TnS000035489g01_novel01	scaffold35489	225437	235766	+	8
TnS000035489g01	TnS000035489g01_novel02	scaffold35489	230926	235767	+	5
TnS000576497g03	TnS000576497g03_novel01	scaffold576497	297295	306861	-	4
TnS000689071g11	TnS000689071g11_novel01	scaffold689071	302658	306531	-	7
TnS000276975g01	TnS000276975g01_novel01	scaffold276975	16230	17568	-	2
TnS000667625g05	TnS000667625g05_novel01	scaffold667625	582739	585773	+	2
TnS000321849g02	TnS000321849g02_novel01	scaffold321849	172596	213988	-	16
TnS000321849g02	TnS000321849g02_novel02	scaffold321849	172608	197191	-	10
TnS000413755g06	TnS000413755g06_novel01	scaffold413755	208397	231364	-	13
TnS000413755g06	TnS000413755g06_novel02	scaffold413755	208400	220829	-	6
TnS000413755g06	TnS000413755g06_novel03	scaffold413755	208379	218362	-	4
TnS000037287g05	TnS000037287g05_novel01	scaffold37287	312042	315880	+	4
TnS000001435g03	TnS000001435g03_novel01	scaffold1435	226888	230027	+	5
TnS000114035g01	TnS000114035g01_novel01	scaffold114035	109596	111048	+	1
TnS000899581g01	TnS000899581g01_novel01	scaffold899581	118292	143667	+	12
TnS000142615g14	TnS000142615g14_novel01	scaffold142615	726496	736124	-	9
TnS000904187g07	TnS000904187g07_novel01	scaffold904187	605245	615720	-	5
TnS000904187g07	TnS000904187g07_novel02	scaffold904187	605300	615637	-	7
TnS000636587g08	TnS000636587g08_novel01	scaffold636587	1568399	1571486	-	4
TnS000157591g03	TnS000157591g03_novel01	scaffold157591	312738	316149	+	1
TnS013911926g02	TnS013911926g02_novel01	scaffold13911926	4912	6717	+	1
TnS000156315g08	TnS000156315g08_novel01	scaffold156315	1213232	1222185	-	8
TnS000292581g03	TnS000292581g03_novel01	scaffold292581	208326	210055	+	2
TnS000677859g01	TnS000677859g01_novel01	scaffold677859	4469	7080	+	4
TnS000677859g01	TnS000677859g01_novel02	scaffold677859	69074	154425	+	26
TnS000470617g12	TnS000470617g12_novel01	scaffold470617	759609	839866	+	10
TnS000470617g12	TnS000470617g12_novel02	scaffold470617	759741	839665	+	11
TnS000049607g07	TnS000049607g07_novel01	scaffold49607	362134	364840	+	7
TnS000049607g07	TnS000049607g07_novel02	scaffold49607	362134	366042	+	5
TnS000574413g04	TnS000574413g04_novel01	scaffold574413	1067694	1069785	+	2
TnS000574413g04	TnS000574413g04_novel02	scaffold574413	1067694	1069785	+	3
TnS000574413g04	TnS000574413g04_novel03	scaffold574413	1069258	1069907	+	1
TnS000282907g06	TnS000282907g06_novel01	scaffold282907	934085	936910	-	4
TnS000282907g06	TnS000282907g06_novel02	scaffold282907	933660	936790	-	5
TnS000282907g06	TnS000282907g06_novel03	scaffold282907	934220	936168	-	3
TnS000236141g01	TnS000236141g01_novel01	scaffold236141	16322	18158	-	2
TnS000222675g05	TnS000222675g05_novel01	scaffold222675	287629	344606	-	7
TnS000222675g05	TnS000222675g05_novel02	scaffold222675	297577	300301	-	1
TnS000894159g04	TnS000894159g04_novel01	scaffold894159	202652	205338	+	5
TnS000894159g04	TnS000894159g04_novel02	scaffold894159	202669	205239	+	4
TnS000319463g03	TnS000319463g03_novel01	scaffold319463	229033	232868	+	8
TnS000319463g03	TnS000319463g03_novel02	scaffold319463	229351	232874	+	9
TnS000382299g01	TnS000382299g01_novel01	scaffold382299	140687	143404	-	8
TnS000201967g01	TnS000201967g01_novel01	scaffold201967	245787	249159	+	2
TnS000378019g05	TnS000378019g05_novel01	scaffold378019	384770	386830	-	2
TnS000378019g05	TnS000378019g05_novel02	scaffold378019	384578	386201	-	2
TnS000622211g03	TnS000622211g03_novel01	scaffold622211	739134	742457	-	4
TnS000979079g01	TnS000979079g01_novel01	scaffold979079	79829	84243	-	4
TnS000806355g01	TnS000806355g01_novel01	scaffold806355	13856	17058	-	2
TnS000224633g01	TnS000224633g01_novel01	scaffold224633	38466	40034	+	1
TnS000021035g01	TnS000021035g01_novel01	scaffold21035	51364	56511	+	6
TnS001002589g02	TnS001002589g02_novel01	scaffold1002589	88106	93625	+	16
TnS000426595g04	TnS000426595g04_novel01	scaffold426595	166472	177406	-	12
TnS000125113g03	TnS000125113g03_novel01	scaffold125113	323172	329992	+	9
TnS000155801g01	TnS000155801g01_novel01	scaffold155801	90973	93389	-	3
TnS000817183g02	TnS000817183g02_novel01	scaffold817183	251931	256440	+	1
TnS000817183g02	TnS000817183g02_novel02	scaffold817183	252046	256441	+	2
TnS000817183g02	TnS000817183g02_novel03	scaffold817183	252046	265936	+	5
TnS000817183g02	TnS000817183g02_novel04	scaffold817183	263999	265955	+	3
TnS000932983g04	TnS000932983g04_novel01	scaffold932983	382974	389589	+	7
TnS000932983g04	TnS000932983g04_novel02	scaffold932983	383014	390064	+	6
TnS000932983g04	TnS000932983g04_novel03	scaffold932983	383032	389620	+	7
TnS000915517g04	TnS000915517g04_novel01	scaffold915517	388933	390826	+	1
TnS000457203g10	TnS000457203g10_novel01	scaffold457203	651178	654475	-	2
TnS000619529g05	TnS000619529g05_novel01	scaffold619529	427694	429511	-	1
TnS000097373g01	TnS000097373g01_novel01	scaffold97373	54092	61033	+	7
TnS000530479g01	TnS000530479g01_novel01	scaffold530479	6342	22414	+	10
TnS000530479g01	TnS000530479g01_novel02	scaffold530479	6386	21586	+	8
TnS000530479g01	TnS000530479g01_novel03	scaffold530479	13669	22411	+	7
TnS000472105g03	TnS000472105g03_novel01	scaffold472105	223321	230450	-	11
TnS000089725g07	TnS000089725g07_novel01	scaffold89725	672332	679121	+	8
TnS000149205g02	TnS000149205g02_novel01	scaffold149205	191545	192943	+	1
TnS001020355g01	TnS001020355g01_novel01	scaffold1020355	79225	86046	-	7
TnS001020355g01	TnS001020355g01_novel02	scaffold1020355	79201	86044	-	9
TnS001020355g01	TnS001020355g01_novel03	scaffold1020355	79223	82785	-	7
TnS001019729g04	TnS001019729g04_novel01	scaffold1019729	476402	497949	-	9
TnS000148855g02	TnS000148855g02_novel01	scaffold148855	83468	88034	-	11
TnS000148855g02	TnS000148855g02_novel02	scaffold148855	83429	87843	-	10
TnS000148855g02	TnS000148855g02_novel03	scaffold148855	83491	87826	-	12
TnS000148855g02	TnS000148855g02_novel04	scaffold148855	83503	87825	-	11
TnS000148855g02	TnS000148855g02_novel05	scaffold148855	82742	87742	-	9
TnS001005993g06	TnS001005993g06_novel01	scaffold1005993	425662	430334	+	5
TnS001005993g06	TnS001005993g06_novel02	scaffold1005993	425662	427128	+	2
TnS000611769g02	TnS000611769g02_novel01	scaffold611769	182901	191310	-	9
TnS000239285g01	TnS000239285g01_novel01	scaffold239285	152386	153720	+	1
TnS000627689g03	TnS000627689g03_novel01	scaffold627689	310660	312307	+	3
TnS000387913g07	TnS000387913g07_novel01	scaffold387913	583182	587121	-	3
TnS000387913g07	TnS000387913g07_novel02	scaffold387913	583076	583289	-	1
TnS000558897g03	TnS000558897g03_novel01	scaffold558897	306207	310033	+	5
TnS000649319g01	TnS000649319g01_novel01	scaffold649319	5714	7532	-	6
TnS000892201g05	TnS000892201g05_novel01	scaffold892201	313459	323688	-	9
TnS000888225g01	TnS000888225g01_novel01	scaffold888225	14940	24065	-	26
TnS000498063g56	TnS000498063g56_novel01	scaffold498063	4999263	5001193	-	2
TnS000498063g56	TnS000498063g56_novel02	scaffold498063	4999171	5001190	-	3
TnS000138039g03	TnS000138039g03_novel01	scaffold138039	123292	129039	-	6
TnS000013573g01	TnS000013573g01_novel01	scaffold13573	15076	37658	-	11
TnS000013573g01	TnS000013573g01_novel02	scaffold13573	15095	37630	-	11
TnS000558897g04	TnS000558897g04_novel01	scaffold558897	475239	477128	-	1
TnS000774347g01	TnS000774347g01_novel01	scaffold774347	46926	50406	+	7
TnS000048449g06	TnS000048449g06_novel01	scaffold48449	577743	585062	+	11
TnS000674141g06	TnS000674141g06_novel01	scaffold674141	915818	928743	-	8
TnS000674141g06	TnS000674141g06_novel02	scaffold674141	915803	927689	-	7
TnS000587783g02	TnS000587783g02_novel01	scaffold587783	80785	85146	-	11
TnS000732031g02	TnS000732031g02_novel01	scaffold732031	201644	204887	+	1
TnS000637609g06	TnS000637609g06_novel01	scaffold637609	700382	712293	-	8
TnS000659067g14	TnS000659067g14_novel01	scaffold659067	2382811	2387226	+	8
TnS000794095g01	TnS000794095g01_novel01	scaffold794095	48487	53912	+	2
TnS000892793g10	TnS000892793g10_novel01	scaffold892793	397288	398715	-	1
TnS000856151g03	TnS000856151g03_novel01	scaffold856151	179859	182195	+	3
TnS000856151g03	TnS000856151g03_novel02	scaffold856151	180252	182212	+	2
TnS000856151g03	TnS000856151g03_novel03	scaffold856151	180600	182213	+	1
TnS000998475g04	TnS000998475g04_novel01	scaffold998475	341496	342827	+	1
TnS000960219g02	TnS000960219g02_novel01	scaffold960219	117056	131068	-	10
TnS000923863g01	TnS000923863g01_novel01	scaffold923863	550845	552670	+	1
TnS000264493g24	TnS000264493g24_novel01	scaffold264493	1436996	1442791	-	3
TnS000264493g24	TnS000264493g24_novel02	scaffold264493	1439516	1440215	-	1
TnS000987883g03	TnS000987883g03_novel01	scaffold987883	559046	567402	-	2
TnS000692159g16	TnS000692159g16_novel01	scaffold692159	1938533	1940547	+	1
TnS000172145g06	TnS000172145g06_novel01	scaffold172145	283941	287067	+	4
TnS000798587g03	TnS000798587g03_novel01	scaffold798587	140484	145978	-	6
TnS000920983g04	TnS000920983g04_novel01	scaffold920983	141826	146676	-	4
TnS000666215g07	TnS000666215g07_novel01	scaffold666215	611104	613763	+	3
TnS000139995g02	TnS000139995g02_novel01	scaffold139995	388052	391166	+	5
TnS000898971g13	TnS000898971g13_novel01	scaffold898971	453896	461107	-	7
TnS000631917g08	TnS000631917g08_novel01	scaffold631917	536696	589042	+	14
TnS000975377g01	TnS000975377g01_novel01	scaffold975377	212504	219163	+	3
TnS000975377g01	TnS000975377g01_novel02	scaffold975377	214111	219019	+	2
TnS000428321g06	TnS000428321g06_novel01	scaffold428321	1061522	1064574	-	2
TnS000881329g01	TnS000881329g01_novel01	scaffold881329	57582	59475	+	1
TnS000702331g01	TnS000702331g01_novel01	scaffold702331	8022	12014	+	9
TnS000835831g05	TnS000835831g05_novel01	scaffold835831	684527	690643	+	6
TnS000095137g03	TnS000095137g03_novel01	scaffold95137	219072	220343	+	1
TnS000763667g04	TnS000763667g04_novel01	scaffold763667	359981	369201	-	7
TnS000763667g04	TnS000763667g04_novel02	scaffold763667	363094	369201	-	4
TnS000763667g04	TnS000763667g04_novel03	scaffold763667	363089	369107	-	3
TnS000763667g04	TnS000763667g04_novel04	scaffold763667	359622	368978	-	6
TnS000763667g04	TnS000763667g04_novel05	scaffold763667	359853	368903	-	7
TnS000763667g04	TnS000763667g04_novel06	scaffold763667	359938	363245	-	4
TnS000763667g04	TnS000763667g04_novel07	scaffold763667	360015	363245	-	3
TnS000456345g01	TnS000456345g01_novel01	scaffold456345	13385	27930	+	12
TnS000238769g26	TnS000238769g26_novel01	scaffold238769	2395909	2400565	+	10
TnS000817183g10	TnS000817183g10_novel01	scaffold817183	636815	642854	+	3
TnS000155889g08	TnS000155889g08_novel01	scaffold155889	841878	846585	-	4
TnS000564307g03	TnS000564307g03_novel01	scaffold564307	339453	379034	+	15
TnS000881329g02	TnS000881329g02_novel01	scaffold881329	66468	68968	-	4
TnS000881329g02	TnS000881329g02_novel02	scaffold881329	66467	68339	-	5
TnS000652921g04	TnS000652921g04_novel01	scaffold652921	66531	82193	-	8
TnS000652921g04	TnS000652921g04_novel02	scaffold652921	68107	82100	-	7
TnS000738073g12	TnS000738073g12_novel01	scaffold738073	1599674	1600789	-	1
TnS000934095g04	TnS000934095g04_novel01	scaffold934095	510481	513744	+	3
TnS000308751g01	TnS000308751g01_novel01	scaffold308751	869	1148	-	1
TnS000858623g01	TnS000858623g01_novel01	scaffold858623	67810	71602	+	10
TnS000080275g01	TnS000080275g01_novel01	scaffold80275	7996	10244	+	4
TnS000080275g01	TnS000080275g01_novel02	scaffold80275	8041	10246	+	5
TnS000937925g05	TnS000937925g05_novel01	scaffold937925	289795	291801	-	2
TnS000396109g05	TnS000396109g05_novel01	scaffold396109	161164	163732	+	1
TnS001021927g11	TnS001021927g11_novel01	scaffold1021927	877954	885824	+	10
TnS001021927g11	TnS001021927g11_novel02	scaffold1021927	878028	885842	+	11
TnS000905347g01	TnS000905347g01_novel01	scaffold905347	105642	110173	+	7
TnS000905347g01	TnS000905347g01_novel02	scaffold905347	105642	109846	+	7
TnS000905347g01	TnS000905347g01_novel03	scaffold905347	105647	110092	+	8
TnS000624169g01	TnS000624169g01_novel01	scaffold624169	88057	154015	+	11
TnS000624169g01	TnS000624169g01_novel02	scaffold624169	88069	89483	+	1
TnS000624169g01	TnS000624169g01_novel03	scaffold624169	88235	154061	+	12
TnS000989587g01	TnS000989587g01_novel01	scaffold989587	7403	9837	+	6
TnS000242443g16	TnS000242443g16_novel01	scaffold242443	903782	905290	+	1
TnS001020801g01	TnS001020801g01_novel01	scaffold1020801	453996	466982	+	9
TnS001020801g01	TnS001020801g01_novel02	scaffold1020801	454052	459154	+	7
TnS000059937g05	TnS000059937g05_novel01	scaffold59937	482050	484926	+	2
TnS000895649g01	TnS000895649g01_novel01	scaffold895649	3861	5704	+	1
TnS000895649g01	TnS000895649g01_novel02	scaffold895649	4083	5936	+	1
TnS000895649g01	TnS000895649g01_novel03	scaffold895649	5724	5936	+	1
TnS000286365g07	TnS000286365g07_novel01	scaffold286365	775418	776595	-	3
TnS000155889g12	TnS000155889g12_novel01	scaffold155889	1034076	1040494	-	15
TnS000805111g06	TnS000805111g06_novel01	scaffold805111	208443	217512	+	11
TnS000805111g06	TnS000805111g06_novel02	scaffold805111	215476	217513	+	2
TnS000699685g02	TnS000699685g02_novel01	scaffold699685	379408	381760	-	3
TnS000699685g02	TnS000699685g02_novel02	scaffold699685	379435	381685	-	4
TnS000699685g02	TnS000699685g02_novel03	scaffold699685	379493	381683	-	4
TnS000610765g01	TnS000610765g01_novel01	scaffold610765	3058	4877	+	2
TnS000610765g01	TnS000610765g01_novel02	scaffold610765	3105	7225	+	6
TnS000610765g01	TnS000610765g01_novel03	scaffold610765	6185	7982	+	1
TnS000984855g15	TnS000984855g15_novel01	scaffold984855	1028030	1030397	-	4
TnS000895955g01	TnS000895955g01_novel01	scaffold895955	41269	52428	+	13
TnS000103057g07	TnS000103057g07_novel01	scaffold103057	744639	748106	+	3
TnS000793803g01	TnS000793803g01_novel01	scaffold793803	69343	84245	+	15
TnS000093481g07	TnS000093481g07_novel01	scaffold93481	625271	627043	+	1
TnS000093481g07	TnS000093481g07_novel02	scaffold93481	627533	629457	+	1
TnS000693017g08	TnS000693017g08_novel01	scaffold693017	790102	800820	-	13
TnS000008643g09	TnS000008643g09_novel01	scaffold8643	529092	535831	+	8
TnS000631495g01	TnS000631495g01_novel01	scaffold631495	234238	318203	+	13
TnS000821077g04	TnS000821077g04_novel01	scaffold821077	784140	790370	-	7
TnS000238769g10	TnS000238769g10_novel01	scaffold238769	1079124	1081550	+	6
TnS000725583g03	TnS000725583g03_novel01	scaffold725583	184120	188483	-	5
TnS000969219g04	TnS000969219g04_novel01	scaffold969219	123072	127331	+	3
TnS000694103g03	TnS000694103g03_novel01	scaffold694103	183905	186968	+	2
TnS000694103g03	TnS000694103g03_novel02	scaffold694103	186053	186929	+	1
TnS000510797g05	TnS000510797g05_novel01	scaffold510797	915938	919549	+	3
TnS000420823g06	TnS000420823g06_novel01	scaffold420823	669583	685339	+	6
TnS000694841g03	TnS000694841g03_novel01	scaffold694841	237924	238938	+	1
TnS001012613g01	TnS001012613g01_novel01	scaffold1012613	15418	23592	+	23
TnS000261349g01	TnS000261349g01_novel01	scaffold261349	23696	26669	-	2
TnS000460789g02	TnS000460789g02_novel01	scaffold460789	51120	60664	-	11
TnS000643479g02	TnS000643479g02_novel01	scaffold643479	237190	246935	+	12
TnS000618359g01	TnS000618359g01_novel01	scaffold618359	108241	121016	-	14
TnS000618359g01	TnS000618359g01_novel02	scaffold618359	108241	120563	-	13
TnS000031647g03	TnS000031647g03_novel01	scaffold31647	170927	179645	+	4
TnS000577547g15	TnS000577547g15_novel01	scaffold577547	658531	662884	-	6
TnS000495043g06	TnS000495043g06_novel01	scaffold495043	671734	675321	-	6
TnS000495043g06	TnS000495043g06_novel02	scaffold495043	671756	675236	-	6
TnS000080863g03	TnS000080863g03_novel01	scaffold80863	518727	524480	-	14
TnS000135803g03	TnS000135803g03_novel01	scaffold135803	76612	81135	-	5
TnS000135803g03	TnS000135803g03_novel02	scaffold135803	76633	80151	-	4
TnS000076323g06	TnS000076323g06_novel01	scaffold76323	1097955	1104915	+	9
TnS000076323g06	TnS000076323g06_novel02	scaffold76323	1097963	1104955	+	9
TnS000076323g06	TnS000076323g06_novel03	scaffold76323	1098439	1105041	+	7
TnS000076323g06	TnS000076323g06_novel04	scaffold76323	1098354	1104957	+	8
TnS000076323g06	TnS000076323g06_novel05	scaffold76323	1100248	1104965	+	4
TnS000076323g06	TnS000076323g06_novel06	scaffold76323	1101709	1104956	+	3
TnS000076323g06	TnS000076323g06_novel07	scaffold76323	1102273	1104931	+	2
TnS000756863g02	TnS000756863g02_novel01	scaffold756863	296736	315207	-	9
TnS000756863g02	TnS000756863g02_novel02	scaffold756863	296726	315207	-	10
TnS000756863g02	TnS000756863g02_novel03	scaffold756863	296726	315207	-	10
TnS000972799g04	TnS000972799g04_novel01	scaffold972799	354806	365819	+	16
TnS000972799g04	TnS000972799g04_novel02	scaffold972799	354908	365813	+	16
TnS000972799g04	TnS000972799g04_novel03	scaffold972799	355319	365754	+	16
TnS000093019g01	TnS000093019g01_novel01	scaffold93019	19016	22738	-	3
TnS000794351g09	TnS000794351g09_novel01	scaffold794351	968941	972458	-	3
TnS000823479g01	TnS000823479g01_novel01	scaffold823479	69345	77078	-	8
TnS000864441g03	TnS000864441g03_novel01	scaffold864441	356574	369591	+	11
TnS000689071g08	TnS000689071g08_novel01	scaffold689071	258049	261041	+	2
TnS000689071g08	TnS000689071g08_novel02	scaffold689071	258050	261199	+	3
TnS000689071g08	TnS000689071g08_novel03	scaffold689071	258187	261040	+	1
TnS000408531g04	TnS000408531g04_novel01	scaffold408531	820597	826627	+	5
TnS001023411g10	TnS001023411g10_novel01	scaffold1023411	395966	401205	+	8
TnS000062385g03	TnS000062385g03_novel01	scaffold62385	69272	136966	+	16
TnS000982989g04	TnS000982989g04_novel01	scaffold982989	500295	509381	-	10
TnS000982989g04	TnS000982989g04_novel02	scaffold982989	500295	506826	-	8
TnS000982989g04	TnS000982989g04_novel03	scaffold982989	499742	502058	-	3
TnS001022663g01	TnS001022663g01_novel01	scaffold1022663	190986	206745	-	10
TnS000932641g03	TnS000932641g03_novel01	scaffold932641	191158	192529	-	4
TnS000932641g03	TnS000932641g03_novel02	scaffold932641	190678	191914	-	1
TnS000517513g02	TnS000517513g02_novel01	scaffold517513	246061	277329	+	14
TnS000895889g03	TnS000895889g03_novel01	scaffold895889	173623	181980	+	8
TnS000160341g01	TnS000160341g01_novel01	scaffold160341	62852	97272	-	14
TnS000898945g03	TnS000898945g03_novel01	scaffold898945	250579	257431	+	16
TnS000898945g03	TnS000898945g03_novel02	scaffold898945	250589	257435	+	17
TnS000266789g01	TnS000266789g01_novel01	scaffold266789	64670	116094	+	10
TnS000499447g01	TnS000499447g01_novel01	scaffold499447	24411	27549	+	6
TnS000499447g01	TnS000499447g01_novel02	scaffold499447	24455	27228	+	6
TnS000089725g08	TnS000089725g08_novel01	scaffold89725	692572	696214	-	3
TnS000314403g02	TnS000314403g02_novel01	scaffold314403	94003	99604	-	7
TnS000239687g01	TnS000239687g01_novel01	scaffold239687	6023	20188	+	11
TnS000263253g02	TnS000263253g02_novel01	scaffold263253	82169	87973	-	3
TnS000864897g10	TnS000864897g10_novel01	scaffold864897	1023281	1028389	-	8
TnS000864897g10	TnS000864897g10_novel02	scaffold864897	1031287	1033722	-	2
TnS000563931g01	TnS000563931g01_novel01	scaffold563931	49216	125137	-	14
TnS000563931g01	TnS000563931g01_novel02	scaffold563931	49208	100051	-	8
TnS000729105g05	TnS000729105g05_novel01	scaffold729105	223764	226152	+	3
TnS000729105g05	TnS000729105g05_novel02	scaffold729105	223854	226169	+	1
TnS000971113g01	TnS000971113g01_novel01	scaffold971113	82989	92418	-	7
TnS000171799g01	TnS000171799g01_novel01	scaffold171799	116161	119392	+	2
TnS000109587g02	TnS000109587g02_novel01	scaffold109587	122641	126916	+	4
TnS000692159g17	TnS000692159g17_novel01	scaffold692159	2137241	2147166	-	10
TnS000316119g02	TnS000316119g02_novel01	scaffold316119	246391	252695	-	9
TnS000316119g02	TnS000316119g02_novel02	scaffold316119	246334	252660	-	9
TnS000316119g02	TnS000316119g02_novel03	scaffold316119	246658	252655	-	9
TnS000008661g03	TnS000008661g03_novel01	scaffold8661	1098999	1102664	+	1
TnS000450229g04	TnS000450229g04_novel01	scaffold450229	133911	171719	-	19
TnS000878817g01	TnS000878817g01_novel01	scaffold878817	94097	100383	+	3
TnS001000703g01	TnS001000703g01_novel01	scaffold1000703	95012	99941	+	2
TnS000305329g05	TnS000305329g05_novel01	scaffold305329	170624	173946	-	3
TnS000166101g02	TnS000166101g02_novel01	scaffold166101	111852	115937	+	4
TnS000287911g01	TnS000287911g01_novel01	scaffold287911	4360	5870	-	4
TnS000689071g14	TnS000689071g14_novel01	scaffold689071	490466	490780	+	1
TnS000137049g01	TnS000137049g01_novel01	scaffold137049	71464	74851	+	4
TnS000752021g01	TnS000752021g01_novel01	scaffold752021	92158	92378	-	1
TnS000938195g01	TnS000938195g01_novel01	scaffold938195	13062	55967	-	9
TnS000938195g01	TnS000938195g01_novel02	scaffold938195	13062	27439	-	3
TnS000820667g08	TnS000820667g08_novel01	scaffold820667	1350796	1353528	+	2
TnS000870713g10	TnS000870713g10_novel01	scaffold870713	1794933	1923810	-	27
TnS000301319g02	TnS000301319g02_novel01	scaffold301319	70966	75099	+	10
TnS000301319g02	TnS000301319g02_novel02	scaffold301319	70970	75072	+	11
TnS000301319g02	TnS000301319g02_novel03	scaffold301319	70972	75066	+	10
TnS000301319g02	TnS000301319g02_novel04	scaffold301319	72758	75068	+	7
TnS000646977g02	TnS000646977g02_novel01	scaffold646977	206069	212214	-	5
TnS000646977g02	TnS000646977g02_novel02	scaffold646977	203750	210169	-	6
TnS000363627g01	TnS000363627g01_novel01	scaffold363627	3041	5348	+	5
TnS000953295g02	TnS000953295g02_novel01	scaffold953295	65203	83733	-	10
TnS000041665g04	TnS000041665g04_novel01	scaffold41665	539000	615692	-	23
TnS000630181g05	TnS000630181g05_novel01	scaffold630181	372349	379999	+	3
TnS000630181g05	TnS000630181g05_novel02	scaffold630181	372308	379905	+	4
TnS000630181g05	TnS000630181g05_novel03	scaffold630181	372833	379903	+	3
TnS000630181g05	TnS000630181g05_novel04	scaffold630181	376351	379936	+	2
TnS000790525g03	TnS000790525g03_novel01	scaffold790525	37005	39917	-	6
TnS000790525g03	TnS000790525g03_novel02	scaffold790525	37019	39917	-	6
TnS000790525g03	TnS000790525g03_novel03	scaffold790525	37008	39887	-	4
TnS000919793g01	TnS000919793g01_novel01	scaffold919793	8854	10235	-	5
TnS000564307g04	TnS000564307g04_novel01	scaffold564307	408234	411316	+	1
TnS000564307g04	TnS000564307g04_novel02	scaffold564307	408234	411510	+	6
TnS000564307g04	TnS000564307g04_novel03	scaffold564307	409412	411316	+	6
TnS000038537g01	TnS000038537g01_novel01	scaffold38537	556505	585044	-	6
TnS000038537g01	TnS000038537g01_novel02	scaffold38537	560511	584831	-	4
TnS000038537g01	TnS000038537g01_novel03	scaffold38537	563708	584831	-	3
TnS000684327g06	TnS000684327g06_novel01	scaffold684327	365003	366625	-	2
TnS000895935g01	TnS000895935g01_novel01	scaffold895935	104629	107656	-	2
TnS000692159g09	TnS000692159g09_novel01	scaffold692159	676007	691015	-	18
TnS000692159g09	TnS000692159g09_novel02	scaffold692159	676017	690785	-	18
TnS000692159g09	TnS000692159g09_novel03	scaffold692159	676002	690467	-	18
TnS000692159g09	TnS000692159g09_novel04	scaffold692159	676007	680896	-	10
TnS000647077g04	TnS000647077g04_novel01	scaffold647077	350627	353161	-	2
TnS000509253g01	TnS000509253g01_novel01	scaffold509253	156204	161209	-	1
TnS000509253g01	TnS000509253g01_novel02	scaffold509253	156338	159671	-	1
TnS000467487g03	TnS000467487g03_novel01	scaffold467487	633679	635941	+	2
TnS000304021g07	TnS000304021g07_novel01	scaffold304021	556718	563744	-	12
TnS000304021g07	TnS000304021g07_novel02	scaffold304021	556772	563394	-	11
TnS000304021g07	TnS000304021g07_novel03	scaffold304021	556612	560045	-	6
TnS000418895g01	TnS000418895g01_novel01	scaffold418895	317230	320344	+	1
TnS000084833g06	TnS000084833g06_novel01	scaffold84833	562063	604063	-	16
TnS000078877g02	TnS000078877g02_novel01	scaffold78877	243846	247135	-	8
TnS000078877g02	TnS000078877g02_novel02	scaffold78877	243933	247003	-	7
TnS000078877g02	TnS000078877g02_novel03	scaffold78877	243955	246895	-	7
TnS000078877g02	TnS000078877g02_novel04	scaffold78877	243887	244359	-	1
TnS000959365g01	TnS000959365g01_novel01	scaffold959365	256848	259857	+	1
TnS000959365g01	TnS000959365g01_novel02	scaffold959365	256937	259870	+	3
TnS000876593g01	TnS000876593g01_novel01	scaffold876593	73164	85620	+	4
TnS000842779g01	TnS000842779g01_novel01	scaffold842779	44979	47315	-	3
TnS000842779g01	TnS000842779g01_novel02	scaffold842779	44920	47263	-	1
TnS001008199g03	TnS001008199g03_novel01	scaffold1008199	305847	309251	+	10
TnS000045385g01	TnS000045385g01_novel01	scaffold45385	91132	95332	+	4
TnS000045385g01	TnS000045385g01_novel02	scaffold45385	91494	95299	+	3
TnS000045385g01	TnS000045385g01_novel03	scaffold45385	93330	95299	+	2
TnS000904857g06	TnS000904857g06_novel01	scaffold904857	442524	444784	+	4
TnS000904857g06	TnS000904857g06_novel02	scaffold904857	442565	444815	+	6
TnS000411229g02	TnS000411229g02_novel01	scaffold411229	40784	46910	-	11
TnS000731583g03	TnS000731583g03_novel01	scaffold731583	621159	654938	+	4
TnS000731583g03	TnS000731583g03_novel02	scaffold731583	635433	635996	+	1
TnS000849033g02	TnS000849033g02_novel01	scaffold849033	113746	117810	+	2
TnS000468741g06	TnS000468741g06_novel01	scaffold468741	506206	509734	+	9
TnS000756143g01	TnS000756143g01_novel01	scaffold756143	94883	178437	-	29
TnS000756143g01	TnS000756143g01_novel02	scaffold756143	30986	107812	-	14
TnS000201597g01	TnS000201597g01_novel01	scaffold201597	16306	30692	+	15
TnS000035493g20	TnS000035493g20_novel01	scaffold35493	1541655	1544857	+	5
TnS000035493g20	TnS000035493g20_novel02	scaffold35493	1543910	1546574	+	3
TnS000035493g20	TnS000035493g20_novel03	scaffold35493	1545076	1546574	+	1
TnS000974901g07	TnS000974901g07_novel01	scaffold974901	160382	163409	-	1
TnS000734161g02	TnS000734161g02_novel01	scaffold734161	437849	465958	+	5
TnS000734161g02	TnS000734161g02_novel02	scaffold734161	438245	466032	+	5
TnS000122229g03	TnS000122229g03_novel01	scaffold122229	179840	181807	+	1
TnS000444633g04	TnS000444633g04_novel01	scaffold444633	457816	459965	+	3
TnS000254591g05	TnS000254591g05_novel01	scaffold254591	450376	457676	+	15
TnS000119223g02	TnS000119223g02_novel01	scaffold119223	139202	141929	-	6
TnS000154435g01	TnS000154435g01_novel01	scaffold154435	10710	27157	-	6
TnS000548585g05	TnS000548585g05_novel01	scaffold548585	202915	210044	-	5
TnS000553811g02	TnS000553811g02_novel01	scaffold553811	95292	97562	+	4
TnS000168789g01	TnS000168789g01_novel01	scaffold168789	40843	45724	+	7
TnS000075309g01	TnS000075309g01_novel01	scaffold75309	97455	102620	+	10
TnS000075309g01	TnS000075309g01_novel02	scaffold75309	97455	102626	+	10
TnS000075309g01	TnS000075309g01_novel03	scaffold75309	101038	102621	+	5
TnS000228493g01	TnS000228493g01_novel01	scaffold228493	58326	65631	+	11
TnS000228493g01	TnS000228493g01_novel02	scaffold228493	58356	65330	+	10
TnS000140981g04	TnS000140981g04_novel01	scaffold140981	295320	297420	-	4
TnS000888407g01	TnS000888407g01_novel01	scaffold888407	22863	25213	+	5
TnS000888407g01	TnS000888407g01_novel02	scaffold888407	22867	25284	+	5
TnS000108357g06	TnS000108357g06_novel01	scaffold108357	669700	674622	+	5
TnS000108357g06	TnS000108357g06_novel02	scaffold108357	672641	674416	+	4
TnS000704251g04	TnS000704251g04_novel01	scaffold704251	578009	582017	-	6
TnS000704251g04	TnS000704251g04_novel02	scaffold704251	578026	581762	-	5
TnS000704251g04	TnS000704251g04_novel03	scaffold704251	578026	581376	-	4
TnS000397783g11	TnS000397783g11_novel01	scaffold397783	803868	806232	+	4
TnS000460777g01	TnS000460777g01_novel01	scaffold460777	320053	338677	+	3
TnS000806355g02	TnS000806355g02_novel01	scaffold806355	12280	17058	+	1
TnS000934945g01	TnS000934945g01_novel01	scaffold934945	85169	87146	+	1
TnS000934945g01	TnS000934945g01_novel02	scaffold934945	85012	87148	+	2
TnS000934945g01	TnS000934945g01_novel03	scaffold934945	87195	91809	+	10
TnS000011759g10	TnS000011759g10_novel01	scaffold11759	719143	722882	-	11
TnS000198535g01	TnS000198535g01_novel01	scaffold198535	56957	98434	-	7
TnS000891351g03	TnS000891351g03_novel01	scaffold891351	175236	188430	+	8
TnS000891351g03	TnS000891351g03_novel02	scaffold891351	175263	188435	+	6
TnS000891351g03	TnS000891351g03_novel03	scaffold891351	175267	188437	+	10
TnS000891351g03	TnS000891351g03_novel04	scaffold891351	177254	188438	+	4
TnS000891351g03	TnS000891351g03_novel05	scaffold891351	177254	188437	+	6
TnS000891351g03	TnS000891351g03_novel06	scaffold891351	177254	188437	+	5
TnS000122145g16	TnS000122145g16_novel01	scaffold122145	1707310	1711181	-	6
TnS000010783g01	TnS000010783g01_novel01	scaffold10783	16340	24251	+	10
TnS000254749g02	TnS000254749g02_novel01	scaffold254749	341627	343749	+	6
TnS000888225g04	TnS000888225g04_novel01	scaffold888225	90801	96292	-	17
TnS000265641g02	TnS000265641g02_novel01	scaffold265641	183950	223004	+	6
TnS000265641g02	TnS000265641g02_novel02	scaffold265641	205575	207547	+	1
TnS001037813g08	TnS001037813g08_novel01	scaffold1037813	1088955	1092446	+	6
TnS001037813g08	TnS001037813g08_novel02	scaffold1037813	1089059	1092531	+	7
TnS000631917g02	TnS000631917g02_novel01	scaffold631917	38503	50608	-	39
TnS000631917g02	TnS000631917g02_novel02	scaffold631917	38478	48844	-	32
TnS000631917g02	TnS000631917g02_novel03	scaffold631917	38504	46826	-	28
TnS000631917g02	TnS000631917g02_novel04	scaffold631917	38502	45452	-	22
TnS000631917g02	TnS000631917g02_novel05	scaffold631917	38265	44409	-	17
TnS000631917g02	TnS000631917g02_novel06	scaffold631917	38504	44133	-	16
TnS000631917g02	TnS000631917g02_novel07	scaffold631917	38484	43491	-	14
TnS000631917g02	TnS000631917g02_novel08	scaffold631917	38558	41994	-	10
TnS000631917g02	TnS000631917g02_novel09	scaffold631917	38638	40582	-	5
TnS000936369g01	TnS000936369g01_novel01	scaffold936369	342697	344413	+	1
TnS000648987g01	TnS000648987g01_novel01	scaffold648987	167313	170665	-	3
TnS000648987g01	TnS000648987g01_novel02	scaffold648987	167325	170664	-	3
TnS000648987g01	TnS000648987g01_novel03	scaffold648987	167353	170607	-	2
TnS000648987g01	TnS000648987g01_novel04	scaffold648987	167220	170575	-	4
TnS000834949g01	TnS000834949g01_novel01	scaffold834949	21584	28598	-	11
TnS000903091g01	TnS000903091g01_novel01	scaffold903091	58606	63928	+	8
TnS000903091g01	TnS000903091g01_novel02	scaffold903091	58831	60904	+	2
TnS000903091g01	TnS000903091g01_novel03	scaffold903091	58964	67285	+	13
TnS000966627g01	TnS000966627g01_novel01	scaffold966627	10346	49559	+	11
TnS000436805g05	TnS000436805g05_novel01	scaffold436805	293942	298711	+	7
TnS000579701g02	TnS000579701g02_novel01	scaffold579701	194561	216052	+	2
TnS000579701g02	TnS000579701g02_novel02	scaffold579701	208901	211078	+	1
TnS000579701g02	TnS000579701g02_novel03	scaffold579701	214312	218215	+	1
TnS000498063g42	TnS000498063g42_novel01	scaffold498063	4018334	4048274	-	7
TnS000498063g42	TnS000498063g42_novel02	scaffold498063	4014785	4048224	-	14
TnS000809851g27	TnS000809851g27_novel01	scaffold809851	3096577	3102805	+	6
TnS000329869g03	TnS000329869g03_novel01	scaffold329869	631979	637440	-	7
TnS000009225g04	TnS000009225g04_novel01	scaffold9225	233584	238557	-	9
TnS000904019g04	TnS000904019g04_novel01	scaffold904019	422137	428156	-	8
TnS000181277g03	TnS000181277g03_novel01	scaffold181277	518624	532790	+	4
TnS000816845g03	TnS000816845g03_novel01	scaffold816845	160284	170141	+	11
TnS000600727g01	TnS000600727g01_novel01	scaffold600727	13921	15990	+	5
TnS000243917g03	TnS000243917g03_novel01	scaffold243917	407991	410858	+	1
TnS000901763g03	TnS000901763g03_novel01	scaffold901763	181802	184437	+	2
TnS001008727g13	TnS001008727g13_novel01	scaffold1008727	1045520	1050543	+	5
TnS000968413g06	TnS000968413g06_novel01	scaffold968413	357607	365373	+	18
TnS000659019g01	TnS000659019g01_novel01	scaffold659019	9379	17465	-	5
TnS000659019g01	TnS000659019g01_novel02	scaffold659019	8964	11212	-	3
TnS000412825g01	TnS000412825g01_novel01	scaffold412825	74445	76752	-	4
TnS000899489g07	TnS000899489g07_novel01	scaffold899489	1116219	1200522	-	15
TnS000899489g07	TnS000899489g07_novel02	scaffold899489	1116191	1170553	-	11
TnS000051751g04	TnS000051751g04_novel01	scaffold51751	164727	169610	+	1
TnS000051751g04	TnS000051751g04_novel02	scaffold51751	167266	175009	+	5
TnS000051751g04	TnS000051751g04_novel03	scaffold51751	167472	175014	+	4
TnS000184407g01	TnS000184407g01_novel01	scaffold184407	52480	60733	+	9
TnS000184407g01	TnS000184407g01_novel02	scaffold184407	52479	59893	+	7
TnS000986829g01	TnS000986829g01_novel01	scaffold986829	117751	122567	+	15
TnS000577547g09	TnS000577547g09_novel01	scaffold577547	252799	255564	-	1
TnS000814175g01	TnS000814175g01_novel01	scaffold814175	19831	23378	-	4
TnS000427783g07	TnS000427783g07_novel01	scaffold427783	525265	541669	-	29
TnS000258283g04	TnS000258283g04_novel01	scaffold258283	333349	338464	+	8
TnS000258283g04	TnS000258283g04_novel02	scaffold258283	334402	338427	+	5
TnS000923257g01	TnS000923257g01_novel01	scaffold923257	40579	58859	-	10
TnS000564683g02	TnS000564683g02_novel01	scaffold564683	144622	170360	+	15
TnS000564683g02	TnS000564683g02_novel02	scaffold564683	156066	170359	+	14
TnS000577103g05	TnS000577103g05_novel01	scaffold577103	625151	636881	-	18
TnS000577103g05	TnS000577103g05_novel02	scaffold577103	625001	629540	-	7
TnS000172833g05	TnS000172833g05_novel01	scaffold172833	1031314	1036706	-	4
TnS000172833g05	TnS000172833g05_novel02	scaffold172833	1031332	1036706	-	2
TnS000414359g12	TnS000414359g12_novel01	scaffold414359	826730	828558	-	2
TnS000996543g09	TnS000996543g09_novel01	scaffold996543	1166251	1173820	+	3
TnS000076667g05	TnS000076667g05_novel01	scaffold76667	492145	497777	+	7
TnS000076667g05	TnS000076667g05_novel02	scaffold76667	492199	497792	+	6
TnS000162935g04	TnS000162935g04_novel01	scaffold162935	600223	634882	+	16
TnS000162935g04	TnS000162935g04_novel02	scaffold162935	600652	634928	+	16
TnS000522937g01	TnS000522937g01_novel01	scaffold522937	42863	101872	-	10
TnS000522937g01	TnS000522937g01_novel02	scaffold522937	42864	53597	-	2
TnS000464453g07	TnS000464453g07_novel01	scaffold464453	1397910	1400967	+	11
TnS000464453g07	TnS000464453g07_novel02	scaffold464453	1397934	1400564	+	10
TnS000219571g02	TnS000219571g02_novel01	scaffold219571	152291	155629	-	8
TnS000219571g02	TnS000219571g02_novel02	scaffold219571	152360	155623	-	9
TnS001000527g03	TnS001000527g03_novel01	scaffold1000527	187212	217825	-	23
TnS001000527g03	TnS001000527g03_novel02	scaffold1000527	187382	216889	-	22
TnS000035757g03	TnS000035757g03_novel01	scaffold35757	169273	178474	-	15
TnS000035757g03	TnS000035757g03_novel02	scaffold35757	173141	178279	-	13
TnS000035757g03	TnS000035757g03_novel03	scaffold35757	176140	178235	-	3
TnS000289289g03	TnS000289289g03_novel01	scaffold289289	201777	299546	+	13
TnS000935225g02	TnS000935225g02_novel01	scaffold935225	85198	138201	-	9
TnS000935225g02	TnS000935225g02_novel02	scaffold935225	85199	138201	-	9
TnS000577547g01	TnS000577547g01_novel01	scaffold577547	13767	17489	-	5
TnS000380533g07	TnS000380533g07_novel01	scaffold380533	482613	484480	-	1
TnS000615171g02	TnS000615171g02_novel01	scaffold615171	161723	193729	-	9
TnS000498063g28	TnS000498063g28_novel01	scaffold498063	2686165	2690964	+	9
TnS000498063g28	TnS000498063g28_novel02	scaffold498063	2686504	2691323	+	9
TnS000498063g28	TnS000498063g28_novel03	scaffold498063	2687344	2691311	+	7
TnS000022753g06	TnS000022753g06_novel01	scaffold22753	315990	320677	+	12
TnS000022753g06	TnS000022753g06_novel02	scaffold22753	316111	320672	+	14
TnS000385049g04	TnS000385049g04_novel01	scaffold385049	147124	151388	-	3
TnS000385049g04	TnS000385049g04_novel02	scaffold385049	147100	149609	-	3
TnS000684153g01	TnS000684153g01_novel01	scaffold684153	3025	5481	-	1
TnS000533047g14	TnS000533047g14_novel01	scaffold533047	1193552	1199142	+	5
TnS000586363g06	TnS000586363g06_novel01	scaffold586363	490249	493289	-	3
TnS000482113g01	TnS000482113g01_novel01	scaffold482113	117777	212502	+	19
TnS000591445g01	TnS000591445g01_novel01	scaffold591445	143709	145356	+	1
TnS000659067g08	TnS000659067g08_novel01	scaffold659067	885407	888262	+	12
TnS000659067g08	TnS000659067g08_novel02	scaffold659067	885566	888182	+	11
TnS000145039g01	TnS000145039g01_novel01	scaffold145039	16647	65642	+	17
TnS000145039g01	TnS000145039g01_novel02	scaffold145039	57065	58031	+	1
TnS000053457g01	TnS000053457g01_novel01	scaffold53457	221788	232708	+	32
TnS000085963g03	TnS000085963g03_novel01	scaffold85963	229641	289672	+	11
TnS000085963g03	TnS000085963g03_novel02	scaffold85963	229642	289407	+	10
TnS000924699g03	TnS000924699g03_novel01	scaffold924699	352254	356461	-	6
TnS000924699g03	TnS000924699g03_novel02	scaffold924699	352256	356432	-	4
TnS001031169g03	TnS001031169g03_novel01	scaffold1031169	581995	591278	-	5
TnS001031169g03	TnS001031169g03_novel02	scaffold1031169	581993	591176	-	4
TnS000777069g03	TnS000777069g03_novel01	scaffold777069	418370	454513	-	11
TnS000800909g09	TnS000800909g09_novel01	scaffold800909	873240	881635	-	22
TnS000054669g03	TnS000054669g03_novel01	scaffold54669	125268	135870	-	19
TnS000054669g03	TnS000054669g03_novel02	scaffold54669	125313	129851	-	12
TnS000290555g17	TnS000290555g17_novel01	scaffold290555	1110037	1112234	-	5
TnS000159553g09	TnS000159553g09_novel01	scaffold159553	629483	632484	-	1
TnS000920123g03	TnS000920123g03_novel01	scaffold920123	159805	161904	-	5
TnS000747423g03	TnS000747423g03_novel01	scaffold747423	459881	466530	+	11
TnS000097081g12	TnS000097081g12_novel01	scaffold97081	1787663	1801718	+	7
TnS000201147g01	TnS000201147g01_novel01	scaffold201147	10209	20008	+	8
TnS000382299g06	TnS000382299g06_novel01	scaffold382299	1098264	1100846	+	1
TnS000135585g10	TnS000135585g10_novel01	scaffold135585	946531	953578	+	6
TnS000135585g10	TnS000135585g10_novel02	scaffold135585	947602	953518	+	5
TnS000097109g01	TnS000097109g01_novel01	scaffold97109	25645	28322	+	1
TnS000097109g01	TnS000097109g01_novel02	scaffold97109	28015	28320	+	1
TnS000933503g01	TnS000933503g01_novel01	scaffold933503	42526	47033	+	3
TnS000933503g01	TnS000933503g01_novel02	scaffold933503	42527	47033	+	1
TnS000560433g06	TnS000560433g06_novel01	scaffold560433	179404	182552	-	3
TnS000203073g11	TnS000203073g11_novel01	scaffold203073	1098036	1101571	+	1
TnS000908759g04	TnS000908759g04_novel01	scaffold908759	136740	141279	+	8
TnS000908759g04	TnS000908759g04_novel02	scaffold908759	138085	141222	+	3
TnS000848033g02	TnS000848033g02_novel01	scaffold848033	132117	135068	+	6
TnS000423067g02	TnS000423067g02_novel01	scaffold423067	284481	309894	-	4
TnS000674453g08	TnS000674453g08_novel01	scaffold674453	538041	539504	+	2
TnS000036561g03	TnS000036561g03_novel01	scaffold36561	121288	127072	-	3
TnS000849033g08	TnS000849033g08_novel01	scaffold849033	592065	660506	-	9
TnS000849033g08	TnS000849033g08_novel02	scaffold849033	592016	660450	-	10
TnS000759069g05	TnS000759069g05_novel01	scaffold759069	312584	320564	-	19
TnS000092449g01	TnS000092449g01_novel01	scaffold92449	48916	54289	+	7
TnS000092449g01	TnS000092449g01_novel02	scaffold92449	51608	54334	+	6
TnS000069483g09	TnS000069483g09_novel01	scaffold69483	816474	824382	-	6
TnS000813181g02	TnS000813181g02_novel01	scaffold813181	161138	166734	+	9
TnS000813181g02	TnS000813181g02_novel02	scaffold813181	162179	166734	+	6
TnS000655931g05	TnS000655931g05_novel01	scaffold655931	1133031	1136302	-	1
TnS000655931g05	TnS000655931g05_novel02	scaffold655931	1133034	1135992	-	3
TnS000891423g04	TnS000891423g04_novel01	scaffold891423	410659	431557	+	25
TnS000891423g04	TnS000891423g04_novel02	scaffold891423	411639	431549	+	20
TnS000891423g04	TnS000891423g04_novel03	scaffold891423	416122	431596	+	14
TnS000891423g04	TnS000891423g04_novel04	scaffold891423	416828	431557	+	13
TnS000891423g04	TnS000891423g04_novel05	scaffold891423	419883	431503	+	9
TnS000435929g06	TnS000435929g06_novel01	scaffold435929	193841	241269	-	17
TnS000564519g05	TnS000564519g05_novel01	scaffold564519	256416	258146	+	2
TnS000191723g01	TnS000191723g01_novel01	scaffold191723	129149	133993	+	3
TnS000640815g11	TnS000640815g11_novel01	scaffold640815	1188485	1190939	-	2
TnS000640815g11	TnS000640815g11_novel02	scaffold640815	1188559	1190939	-	1
TnS000984713g02	TnS000984713g02_novel01	scaffold984713	79144	81434	+	4
TnS000220411g05	TnS000220411g05_novel01	scaffold220411	634404	637490	-	4
TnS000220411g05	TnS000220411g05_novel02	scaffold220411	634411	637462	-	5
TnS000220411g05	TnS000220411g05_novel03	scaffold220411	634432	635761	-	4
TnS000220411g05	TnS000220411g05_novel04	scaffold220411	651303	654281	-	5
TnS000220411g05	TnS000220411g05_novel05	scaffold220411	651344	651919	-	2
TnS000670245g02	TnS000670245g02_novel01	scaffold670245	291337	334555	+	29
TnS000592665g03	TnS000592665g03_novel01	scaffold592665	365501	395338	-	12
TnS000592665g03	TnS000592665g03_novel02	scaffold592665	372617	395338	-	8
TnS000592665g03	TnS000592665g03_novel03	scaffold592665	372590	395261	-	8
TnS000592665g03	TnS000592665g03_novel04	scaffold592665	349007	380552	-	22
TnS000408583g04	TnS000408583g04_novel01	scaffold408583	383058	386971	+	2
TnS000809851g03	TnS000809851g03_novel01	scaffold809851	216167	230957	+	5
TnS000809851g03	TnS000809851g03_novel02	scaffold809851	218572	231289	+	3
TnS000850577g04	TnS000850577g04_novel01	scaffold850577	445354	538270	-	9
TnS000850577g04	TnS000850577g04_novel02	scaffold850577	534028	538270	-	2
TnS000545385g12	TnS000545385g12_novel01	scaffold545385	648913	655546	+	4
TnS000219309g01	TnS000219309g01_novel01	scaffold219309	360881	363679	-	5
TnS000391609g02	TnS000391609g02_novel01	scaffold391609	48337	53107	-	7
TnS000867017g31	TnS000867017g31_novel01	scaffold867017	3432607	3436508	+	2
TnS000867017g31	TnS000867017g31_novel02	scaffold867017	3432712	3436589	+	2
TnS000867017g31	TnS000867017g31_novel03	scaffold867017	3432706	3455421	+	15
TnS000867017g31	TnS000867017g31_novel04	scaffold867017	3432745	3455447	+	15
TnS000867017g31	TnS000867017g31_novel05	scaffold867017	3449890	3455474	+	12
TnS000867017g31	TnS000867017g31_novel06	scaffold867017	3453315	3455476	+	7
TnS000463811g03	TnS000463811g03_novel01	scaffold463811	193552	195692	-	2
TnS000288437g01	TnS000288437g01_novel01	scaffold288437	164362	190134	-	8
TnS000545957g03	TnS000545957g03_novel01	scaffold545957	119870	137708	+	35
TnS000994443g23	TnS000994443g23_novel01	scaffold994443	2256445	2260518	+	3
TnS000994443g23	TnS000994443g23_novel02	scaffold994443	2256445	2258915	+	2
TnS000043073g03	TnS000043073g03_novel01	scaffold43073	280111	282358	-	3
TnS000302405g06	TnS000302405g06_novel01	scaffold302405	151114	157597	-	8
TnS000972273g04	TnS000972273g04_novel01	scaffold972273	111077	123395	-	5
TnS000972273g04	TnS000972273g04_novel02	scaffold972273	111076	122755	-	6
TnS000622745g13	TnS000622745g13_novel01	scaffold622745	454968	467300	-	25
TnS000622745g13	TnS000622745g13_novel02	scaffold622745	455083	465325	-	20
TnS000819183g04	TnS000819183g04_novel01	scaffold819183	446953	448212	-	1
TnS000555485g01	TnS000555485g01_novel01	scaffold555485	106685	109235	+	8
TnS001034791g03	TnS001034791g03_novel01	scaffold1034791	252502	254914	-	4
TnS000545385g09	TnS000545385g09_novel01	scaffold545385	484587	503111	+	14
TnS000821471g03	TnS000821471g03_novel01	scaffold821471	190499	195713	-	6
TnS000866741g03	TnS000866741g03_novel01	scaffold866741	102175	107948	-	9
TnS000839827g14	TnS000839827g14_novel01	scaffold839827	1414300	1420723	+	10
TnS000839827g14	TnS000839827g14_novel02	scaffold839827	1414686	1420783	+	9
TnS000408461g03	TnS000408461g03_novel01	scaffold408461	364061	370503	-	4
TnS000790335g02	TnS000790335g02_novel01	scaffold790335	236598	243903	+	9
TnS000290555g11	TnS000290555g11_novel01	scaffold290555	438969	442555	-	8
TnS000290555g11	TnS000290555g11_novel02	scaffold290555	530246	533915	-	8
TnS000865851g01	TnS000865851g01_novel01	scaffold865851	29913	35532	+	4
TnS000865851g01	TnS000865851g01_novel02	scaffold865851	31564	35706	+	4
TnS000582695g03	TnS000582695g03_novel01	scaffold582695	900508	907106	-	15
TnS000582695g03	TnS000582695g03_novel02	scaffold582695	902535	906455	-	11
TnS000582695g03	TnS000582695g03_novel03	scaffold582695	900510	905647	-	13
TnS000582695g03	TnS000582695g03_novel04	scaffold582695	900431	904962	-	11
TnS000582695g03	TnS000582695g03_novel05	scaffold582695	900345	904610	-	10
TnS000582695g03	TnS000582695g03_novel06	scaffold582695	900496	904195	-	9
TnS000582695g03	TnS000582695g03_novel07	scaffold582695	900431	903976	-	8
TnS000582695g03	TnS000582695g03_novel08	scaffold582695	900433	902931	-	5
TnS000582695g03	TnS000582695g03_novel09	scaffold582695	900502	902634	-	4
TnS000582695g03	TnS000582695g03_novel10	scaffold582695	900506	902184	-	3
TnS000189967g06	TnS000189967g06_novel01	scaffold189967	637336	640083	+	5
TnS000189967g06	TnS000189967g06_novel02	scaffold189967	638596	639964	+	3
TnS000540273g01	TnS000540273g01_novel01	scaffold540273	138334	139109	+	1
TnS000205277g01	TnS000205277g01_novel01	scaffold205277	168453	223709	+	8
TnS000205277g01	TnS000205277g01_novel02	scaffold205277	228184	230034	+	1
TnS000160231g01	TnS000160231g01_novel01	scaffold160231	81958	112300	-	15
TnS000160231g01	TnS000160231g01_novel02	scaffold160231	107416	112300	-	2
TnS000912337g03	TnS000912337g03_novel01	scaffold912337	259185	262690	+	4
TnS000912337g03	TnS000912337g03_novel02	scaffold912337	259424	262211	+	3
TnS000912337g03	TnS000912337g03_novel03	scaffold912337	260585	262682	+	3
TnS000783711g01	TnS000783711g01_novel01	scaffold783711	164487	169410	+	9
TnS001032267g01	TnS001032267g01_novel01	scaffold1032267	77435	104781	+	10
TnS000857049g03	TnS000857049g03_novel01	scaffold857049	202433	224940	-	11
TnS000719089g23	TnS000719089g23_novel01	scaffold719089	1632367	1657498	+	17
TnS000870713g02	TnS000870713g02_novel01	scaffold870713	828456	838665	-	7
TnS000482629g01	TnS000482629g01_novel01	scaffold482629	115977	121213	-	4
TnS000009773g03	TnS000009773g03_novel01	scaffold9773	329478	332642	+	1
TnS000009773g03	TnS000009773g03_novel02	scaffold9773	331799	332005	+	1
TnS000009773g03	TnS000009773g03_novel03	scaffold9773	329490	333131	+	2
TnS000226557g04	TnS000226557g04_novel01	scaffold226557	926475	954983	+	6
TnS000226557g04	TnS000226557g04_novel02	scaffold226557	926527	954985	+	6
TnS000226557g04	TnS000226557g04_novel03	scaffold226557	926531	955004	+	6
TnS000849959g01	TnS000849959g01_novel01	scaffold849959	30517	44335	-	17
TnS000124043g04	TnS000124043g04_novel01	scaffold124043	396490	403819	-	21
TnS000124043g04	TnS000124043g04_novel02	scaffold124043	396463	402829	-	17
TnS000124043g04	TnS000124043g04_novel03	scaffold124043	396489	401822	-	13
TnS000124043g04	TnS000124043g04_novel04	scaffold124043	396289	401479	-	12
TnS000124043g04	TnS000124043g04_novel05	scaffold124043	396463	400908	-	11
TnS000124043g04	TnS000124043g04_novel06	scaffold124043	396465	399672	-	7
TnS000124043g04	TnS000124043g04_novel07	scaffold124043	396285	398947	-	6
TnS000731583g05	TnS000731583g05_novel01	scaffold731583	701895	708375	+	6
TnS000670009g01	TnS000670009g01_novel01	scaffold670009	78578	85574	-	4
TnS000670009g01	TnS000670009g01_novel02	scaffold670009	76167	85267	-	5
TnS000670009g01	TnS000670009g01_novel03	scaffold670009	76044	85265	-	4
TnS000670009g01	TnS000670009g01_novel04	scaffold670009	76166	83055	-	3
TnS000670009g01	TnS000670009g01_novel05	scaffold670009	76144	81748	-	2
TnS000670009g01	TnS000670009g01_novel06	scaffold670009	79283	80411	-	1
TnS000670009g01	TnS000670009g01_novel07	scaffold670009	76020	77766	-	1
TnS000111115g01	TnS000111115g01_novel01	scaffold111115	72535	73209	+	1
TnS000155567g13	TnS000155567g13_novel01	scaffold155567	1046052	1050944	+	9
TnS000907713g06	TnS000907713g06_novel01	scaffold907713	797614	802326	-	5
TnS000907713g06	TnS000907713g06_novel02	scaffold907713	797749	800791	-	3
TnS000506745g01	TnS000506745g01_novel01	scaffold506745	127467	128609	+	1
TnS000506745g01	TnS000506745g01_novel02	scaffold506745	146064	146906	+	1
TnS000038381g02	TnS000038381g02_novel01	scaffold38381	83418	85935	+	3
TnS000038381g02	TnS000038381g02_novel02	scaffold38381	83463	85402	+	3
TnS000750831g01	TnS000750831g01_novel01	scaffold750831	11827	18519	+	12
TnS000750831g01	TnS000750831g01_novel02	scaffold750831	16419	18477	+	3
TnS000357211g04	TnS000357211g04_novel01	scaffold357211	519070	524816	-	7
TnS000357211g04	TnS000357211g04_novel02	scaffold357211	516518	524764	-	10
TnS000249031g06	TnS000249031g06_novel01	scaffold249031	143553	144832	-	2
TnS000490811g02	TnS000490811g02_novel01	scaffold490811	102575	105367	+	1
TnS000788347g03	TnS000788347g03_novel01	scaffold788347	149581	183078	+	13
TnS000788347g03	TnS000788347g03_novel02	scaffold788347	149616	150868	+	1
TnS000191543g01	TnS000191543g01_novel01	scaffold191543	126267	129041	+	1
TnS000191543g01	TnS000191543g01_novel02	scaffold191543	148566	150623	+	2
TnS000465361g01	TnS000465361g01_novel01	scaffold465361	106420	110085	+	1
TnS000516129g01	TnS000516129g01_novel01	scaffold516129	232991	233815	+	1
TnS000956981g05	TnS000956981g05_novel01	scaffold956981	382258	387518	-	3
TnS000956981g05	TnS000956981g05_novel02	scaffold956981	381997	387510	-	3
TnS000549037g02	TnS000549037g02_novel01	scaffold549037	132670	136548	-	3
TnS000549037g02	TnS000549037g02_novel02	scaffold549037	132580	136347	-	5
TnS000490535g01	TnS000490535g01_novel01	scaffold490535	81267	106814	-	28
TnS000490535g01	TnS000490535g01_novel02	scaffold490535	81292	104812	-	25
TnS000490535g01	TnS000490535g01_novel03	scaffold490535	81270	94841	-	21
TnS000490535g01	TnS000490535g01_novel04	scaffold490535	81292	84339	-	10
TnS000054135g04	TnS000054135g04_novel01	scaffold54135	289251	320172	-	8
TnS000261797g17	TnS000261797g17_novel01	scaffold261797	1104463	1110126	-	10
TnS000655603g09	TnS000655603g09_novel01	scaffold655603	1072156	1080288	+	22
TnS000655603g09	TnS000655603g09_novel02	scaffold655603	1073081	1080398	+	20
TnS000701533g01	TnS000701533g01_novel01	scaffold701533	26793	38489	-	18
TnS000453267g01	TnS000453267g01_novel01	scaffold453267	351744	361488	-	6
TnS000792459g06	TnS000792459g06_novel01	scaffold792459	221498	224064	-	4
TnS000031647g21	TnS000031647g21_novel01	scaffold31647	2131404	2160508	-	11
TnS000083883g01	TnS000083883g01_novel01	scaffold83883	4073	7138	+	2
TnS000675633g01	TnS000675633g01_novel01	scaffold675633	79872	84353	-	12
TnS000675633g01	TnS000675633g01_novel02	scaffold675633	79776	84287	-	12
TnS000506453g05	TnS000506453g05_novel01	scaffold506453	548082	554355	+	12
TnS000801635g01	TnS000801635g01_novel01	scaffold801635	230018	235330	+	9
TnS000801635g01	TnS000801635g01_novel02	scaffold801635	230026	235253	+	10
TnS000976981g06	TnS000976981g06_novel01	scaffold976981	549297	556645	+	3
TnS000766203g03	TnS000766203g03_novel01	scaffold766203	80228	86241	+	10
TnS000012029g01	TnS000012029g01_novel01	scaffold12029	40100	41544	+	3
TnS000958809g02	TnS000958809g02_novel01	scaffold958809	162085	166977	+	5
TnS000958809g02	TnS000958809g02_novel02	scaffold958809	165492	167047	+	3
TnS000833519g01	TnS000833519g01_novel01	scaffold833519	4502	16896	+	7
TnS000833519g01	TnS000833519g01_novel02	scaffold833519	4650	17007	+	6
TnS000679707g04	TnS000679707g04_novel01	scaffold679707	414201	417445	-	1
TnS000679707g04	TnS000679707g04_novel02	scaffold679707	414312	417349	-	2
TnS000678221g07	TnS000678221g07_novel01	scaffold678221	771729	777768	+	3
TnS000678221g07	TnS000678221g07_novel02	scaffold678221	771729	777767	+	3
TnS000516169g01	TnS000516169g01_novel01	scaffold516169	117803	120589	-	2
TnS000516169g01	TnS000516169g01_novel02	scaffold516169	117808	120425	-	1
TnS000588041g02	TnS000588041g02_novel01	scaffold588041	294938	317824	+	10
TnS000588041g02	TnS000588041g02_novel02	scaffold588041	295026	317824	+	11
TnS000996777g12	TnS000996777g12_novel01	scaffold996777	1036376	1041658	-	4
TnS000243511g04	TnS000243511g04_novel01	scaffold243511	130174	136688	+	11
TnS000136271g07	TnS000136271g07_novel01	scaffold136271	739954	742641	-	3
TnS000731401g04	TnS000731401g04_novel01	scaffold731401	612393	618952	-	14
TnS000731401g04	TnS000731401g04_novel02	scaffold731401	612394	618221	-	12
TnS000731401g04	TnS000731401g04_novel03	scaffold731401	612300	618057	-	11
TnS000731401g04	TnS000731401g04_novel04	scaffold731401	612296	617288	-	10
TnS000731401g04	TnS000731401g04_novel05	scaffold731401	612395	615289	-	8
TnS000257699g01	TnS000257699g01_novel01	scaffold257699	13191	15778	-	4
TnS000662489g01	TnS000662489g01_novel01	scaffold662489	9383	11519	+	3
TnS000662489g01	TnS000662489g01_novel02	scaffold662489	9467	11472	+	3
TnS000457701g07	TnS000457701g07_novel01	scaffold457701	300533	308388	-	4
TnS000700771g02	TnS000700771g02_novel01	scaffold700771	99135	109528	-	11
TnS000732417g01	TnS000732417g01_novel01	scaffold732417	48241	107510	-	10
TnS000703273g23	TnS000703273g23_novel01	scaffold703273	2385529	2390091	-	3
TnS000435351g03	TnS000435351g03_novel01	scaffold435351	280035	283122	-	2
TnS000842983g07	TnS000842983g07_novel01	scaffold842983	317869	319365	-	2
TnS000527347g03	TnS000527347g03_novel01	scaffold527347	334750	339766	-	2
TnS000873383g08	TnS000873383g08_novel01	scaffold873383	780299	781819	+	1
TnS000283349g02	TnS000283349g02_novel01	scaffold283349	138572	173120	-	2
TnS000065009g06	TnS000065009g06_novel01	scaffold65009	248384	254460	+	6
TnS000002575g13	TnS000002575g13_novel01	scaffold2575	1134385	1138851	+	9
TnS000002575g13	TnS000002575g13_novel02	scaffold2575	1136363	1138742	+	6
TnS000090457g06	TnS000090457g06_novel01	scaffold90457	786268	788873	+	3
TnS000090457g06	TnS000090457g06_novel02	scaffold90457	788114	788875	+	1
TnS000142615g05	TnS000142615g05_novel01	scaffold142615	300091	316296	-	4
TnS000582937g02	TnS000582937g02_novel01	scaffold582937	195591	198714	+	2
TnS000122471g05	TnS000122471g05_novel01	scaffold122471	500627	513998	+	6
TnS000190843g03	TnS000190843g03_novel01	scaffold190843	99128	102854	+	4
TnS000190843g03	TnS000190843g03_novel02	scaffold190843	99698	102607	+	2
TnS000161879g03	TnS000161879g03_novel01	scaffold161879	190561	193279	-	11
TnS000837707g01	TnS000837707g01_novel01	scaffold837707	27743	29433	+	2
TnS000946403g09	TnS000946403g09_novel01	scaffold946403	927473	928595	+	1
TnS000783711g04	TnS000783711g04_novel01	scaffold783711	421313	429233	+	14
TnS000036231g02	TnS000036231g02_novel01	scaffold36231	214716	215936	-	1
TnS000292945g01	TnS000292945g01_novel01	scaffold292945	30609	33950	-	4
TnS000194637g01	TnS000194637g01_novel01	scaffold194637	6462	11968	+	5
TnS000194637g01	TnS000194637g01_novel02	scaffold194637	6626	8955	+	4
TnS001009607g02	TnS001009607g02_novel01	scaffold1009607	249106	277808	+	11
TnS000317261g01	TnS000317261g01_novel01	scaffold317261	178339	266168	+	6
TnS000249121g01	TnS000249121g01_novel01	scaffold249121	122339	130766	-	11
TnS000249121g01	TnS000249121g01_novel02	scaffold249121	122358	130737	-	11
TnS000249121g01	TnS000249121g01_novel03	scaffold249121	125739	130598	-	7
TnS000249121g01	TnS000249121g01_novel04	scaffold249121	122335	126735	-	8
TnS000173905g02	TnS000173905g02_novel01	scaffold173905	373794	449616	-	12
TnS000173905g02	TnS000173905g02_novel02	scaffold173905	373860	398012	-	7
TnS001029693g01	TnS001029693g01_novel01	scaffold1029693	15355	25736	+	5
TnS001029693g01	TnS001029693g01_novel02	scaffold1029693	15356	90579	+	12
TnS000138039g01	TnS000138039g01_novel01	scaffold138039	33843	35841	+	3
TnS000139725g01	TnS000139725g01_novel01	scaffold139725	6019	10953	-	7
TnS000057613g14	TnS000057613g14_novel01	scaffold57613	553204	556114	-	3
TnS000060437g01	TnS000060437g01_novel01	scaffold60437	2717	4836	+	1
TnS000811647g03	TnS000811647g03_novel01	scaffold811647	431871	434651	-	6
TnS000811647g03	TnS000811647g03_novel02	scaffold811647	431871	434246	-	4
TnS000811647g03	TnS000811647g03_novel03	scaffold811647	431921	433387	-	3
TnS000097785g02	TnS000097785g02_novel01	scaffold97785	115255	128418	+	13
TnS000097785g02	TnS000097785g02_novel02	scaffold97785	127027	153040	+	26
TnS000754619g02	TnS000754619g02_novel01	scaffold754619	573987	577707	+	6
TnS000754619g02	TnS000754619g02_novel02	scaffold754619	575310	577707	+	4
TnS000508917g05	TnS000508917g05_novel01	scaffold508917	289566	292514	+	2
TnS000194659g04	TnS000194659g04_novel01	scaffold194659	139396	143988	+	4
TnS000636259g01	TnS000636259g01_novel01	scaffold636259	322265	331163	+	6
TnS000385049g11	TnS000385049g11_novel01	scaffold385049	789215	807549	-	18
TnS000078661g05	TnS000078661g05_novel01	scaffold78661	908582	912670	+	2
TnS000305447g01	TnS000305447g01_novel01	scaffold305447	179889	188009	+	3
TnS000171799g02	TnS000171799g02_novel01	scaffold171799	120988	123061	-	5
TnS000070949g04	TnS000070949g04_novel01	scaffold70949	321421	327798	+	12
TnS000070949g04	TnS000070949g04_novel02	scaffold70949	327170	327848	+	2
TnS000141653g01	TnS000141653g01_novel01	scaffold141653	13772	16384	+	4
TnS000396329g02	TnS000396329g02_novel01	scaffold396329	285137	319357	-	13
TnS000443893g01	TnS000443893g01_novel01	scaffold443893	162248	171955	-	11
TnS000821471g20	TnS000821471g20_novel01	scaffold821471	2381154	2488331	-	10
TnS000821471g20	TnS000821471g20_novel02	scaffold821471	2380958	2448865	-	7
TnS000650823g04	TnS000650823g04_novel01	scaffold650823	442374	445910	+	8
TnS000650823g04	TnS000650823g04_novel02	scaffold650823	442376	445910	+	8
TnS000104451g01	TnS000104451g01_novel01	scaffold104451	29877	34887	-	10
TnS000104451g01	TnS000104451g01_novel02	scaffold104451	29905	34857	-	9
TnS000104451g01	TnS000104451g01_novel03	scaffold104451	29921	33725	-	8
TnS000867875g02	TnS000867875g02_novel01	scaffold867875	180259	185882	-	2
TnS000867875g02	TnS000867875g02_novel02	scaffold867875	176379	179706	-	1
TnS000415443g02	TnS000415443g02_novel01	scaffold415443	220298	235009	+	4
TnS000214043g03	TnS000214043g03_novel01	scaffold214043	353690	360609	-	6
TnS000099607g01	TnS000099607g01_novel01	scaffold99607	31209	45430	+	7
TnS000883791g02	TnS000883791g02_novel01	scaffold883791	109161	111036	-	2
TnS000910729g07	TnS000910729g07_novel01	scaffold910729	381440	388530	-	8
TnS000254289g01	TnS000254289g01_novel01	scaffold254289	49843	61558	+	6
TnS000783257g01	TnS000783257g01_novel01	scaffold783257	148184	156304	+	3
TnS000006303g05	TnS000006303g05_novel01	scaffold6303	595284	611369	-	8
TnS000972563g03	TnS000972563g03_novel01	scaffold972563	315024	316376	+	1
TnS000216073g01	TnS000216073g01_novel01	scaffold216073	32860	35873	+	3
TnS000216073g01	TnS000216073g01_novel02	scaffold216073	33085	35871	+	2
TnS000408461g04	TnS000408461g04_novel01	scaffold408461	536006	551690	-	13
TnS000508917g09	TnS000508917g09_novel01	scaffold508917	1047081	1085473	-	7
TnS000321571g04	TnS000321571g04_novel01	scaffold321571	206549	209686	-	4
TnS000306427g05	TnS000306427g05_novel01	scaffold306427	340787	347401	+	6
[truncated: 4,328 more rows]

## Sheet: transcript from novel genes
GeneID	Chromosome	Start	End	Strand	Isoforms
Novelgene0001	scaffold320449	278106	281328	+	1
Novelgene0002	scaffold555735	28115	30038	+	1
Novelgene0003	scaffold538527	10440	13229	+	1
Novelgene0004	scaffold538527	83106	96030	+	1
Novelgene0005	scaffold1036471	147964	151565	+	1
Novelgene0006	scaffold404455	30751	32507	+	1
Novelgene0007	scaffold196935	262488	265425	+	1
Novelgene0008	scaffold926237	18842	23335	+	1
Novelgene0009	scaffold13892062	1	2021	+	1
Novelgene0010	scaffold62973	573452	576801	+	1
Novelgene0011	scaffold62973	1082981	1088273	+	1
Novelgene0012	scaffold62973	1089605	1094169	+	1
Novelgene0013	scaffold62973	1444299	1527894	+	18
Novelgene0014	scaffold632019	102707	105803	+	1
Novelgene0015	scaffold454393	686780	689192	+	1
Novelgene0016	scaffold454393	697707	700170	+	1
Novelgene0017	scaffold102679	80958	82256	+	1
Novelgene0018	scaffold473031	189173	194939	+	1
Novelgene0019	scaffold723435	2941276	2964788	+	1
Novelgene0020	scaffold487277	551582	555951	+	1
Novelgene0021	scaffold234581	445375	448337	+	1
Novelgene0022	scaffold548585	128073	130201	+	1
Novelgene0023	scaffold548585	202644	207109	+	1
Novelgene0024	scaffold548585	285974	287442	+	1
Novelgene0025	scaffold305329	170409	173938	+	1
Novelgene0026	scaffold9283	493055	497182	+	1
Novelgene0027	scaffold506649	30348	33155	+	1
Novelgene0028	scaffold3411	485299	487544	+	1
Novelgene0029	scaffold870381	138721	141121	+	1
Novelgene0030	scaffold870381	528761	531529	+	1
Novelgene0031	scaffold870381	1010116	1014556	+	1
Novelgene0032	scaffold666425	37288	43125	+	2
Novelgene0033	scaffold748833	205467	208919	+	1
Novelgene0034	scaffold516007	49441	55356	+	4
Novelgene0035	scaffold516007	55920	60923	+	1
Novelgene0036	scaffold832981	18642	22772	+	1
Novelgene0037	scaffold820405	51360	54045	+	2
Novelgene0038	scaffold159511	204625	205548	+	1
Novelgene0039	scaffold947603	29788	35261	+	1
Novelgene0040	scaffold673325	27669	28649	+	1
Novelgene0041	scaffold829583	759635	763884	+	1
Novelgene0042	scaffold829583	892820	897642	+	1
Novelgene0043	scaffold829585	83925	88378	+	1
Novelgene0044	scaffold829585	137289	141834	+	1
Novelgene0045	scaffold765393	160429	165188	+	1
Novelgene0046	scaffold33513	20218	25475	+	2
Novelgene0047	scaffold752021	1181130	1184281	+	1
Novelgene0048	scaffold239577	15153	19078	+	1
Novelgene0049	scaffold44773	1	2482	+	1
Novelgene0050	scaffold802427	27493	31806	+	1
Novelgene0051	scaffold802427	65282	73208	+	2
Novelgene0052	scaffold103057	549687	556218	+	2
Novelgene0053	scaffold103057	598382	600883	+	1
Novelgene0054	scaffold963599	558876	560973	+	1
Novelgene0055	scaffold844941	119774	124935	+	1
Novelgene0056	scaffold883407	288639	292605	+	1
Novelgene0057	scaffold759065	152206	156252	+	1
Novelgene0058	scaffold908873	2114	4397	+	1
Novelgene0059	scaffold154673	1470060	1476498	+	1
Novelgene0060	scaffold154673	1478064	1480975	+	1
Novelgene0061	scaffold759069	391251	394632	+	1
Novelgene0062	scaffold1021915	47097	50892	+	1
Novelgene0063	scaffold617349	691832	695763	+	1
Novelgene0064	scaffold617349	702155	705261	+	1
Novelgene0065	scaffold617349	705536	708930	+	1
Novelgene0066	scaffold617349	739068	741174	+	1
Novelgene0067	scaffold259041	97607	100758	+	1
Novelgene0068	scaffold147417	180401	185252	+	2
Novelgene0069	scaffold147417	186651	189491	+	1
Novelgene0070	scaffold147417	270661	271841	+	1
Novelgene0071	scaffold147417	357371	360301	+	1
Novelgene0072	scaffold41665	594512	596157	+	1
Novelgene0073	scaffold837067	434461	437189	+	1
Novelgene0074	scaffold838061	26777	28123	+	1
Novelgene0075	scaffold61955	50958	53807	+	1
Novelgene0076	scaffold719089	93379	95089	+	1
Novelgene0077	scaffold719089	444078	447466	+	1
Novelgene0078	scaffold719089	633786	639221	+	2
Novelgene0079	scaffold719089	813516	821522	+	3
Novelgene0080	scaffold625545	91566	94706	+	1
Novelgene0081	scaffold604587	44146	46698	+	1
Novelgene0082	scaffold264597	100946	105369	+	1
Novelgene0083	scaffold264597	410476	507754	+	1
Novelgene0084	scaffold264597	523872	529438	+	1
Novelgene0085	scaffold264597	533393	538178	+	1
Novelgene0086	scaffold264597	540355	542429	+	1
Novelgene0087	scaffold264597	945905	948583	+	1
Novelgene0088	scaffold932489	54754	57747	+	1
Novelgene0089	scaffold441621	874401	879555	+	2
Novelgene0090	scaffold423563	23767	25801	+	1
Novelgene0091	scaffold152709	113089	115995	+	1
Novelgene0092	scaffold408601	35999	40917	+	2
Novelgene0093	scaffold407129	338578	340656	+	1
Novelgene0094	scaffold592665	372590	375037	+	1
Novelgene0095	scaffold973325	279456	282104	+	1
Novelgene0096	scaffold432769	668630	671392	+	1
Novelgene0097	scaffold931457	16847	55870	+	8
Novelgene0098	scaffold931457	380148	385217	+	2
Novelgene0099	scaffold985015	118702	121730	+	1
Novelgene0100	scaffold994775	388719	392273	+	1
Novelgene0101	scaffold299657	705491	709618	+	1
Novelgene0102	scaffold138667	185539	189536	+	1
Novelgene0103	scaffold1038095	350448	353683	+	1
Novelgene0104	scaffold1038095	580435	583501	+	1
Novelgene0105	scaffold1038095	595482	597787	+	1
Novelgene0106	scaffold1038095	641221	645072	+	1
Novelgene0107	scaffold494949	131825	133835	+	1
Novelgene0108	scaffold840685	432	5563	+	2
Novelgene0109	scaffold737405	64693	88415	+	9
Novelgene0110	scaffold737405	539720	542660	+	2
Novelgene0111	scaffold838113	188465	190830	+	1
Novelgene0112	scaffold1849	115416	124413	+	1
Novelgene0113	scaffold1849	132547	138511	+	1
Novelgene0114	scaffold1849	177340	180396	+	1
Novelgene0115	scaffold362775	2401	4883	+	1
Novelgene0116	scaffold952127	181612	187498	+	2
Novelgene0117	scaffold23027	511525	512658	+	1
Novelgene0118	scaffold1016041	289757	293089	+	1
Novelgene0119	scaffold75981	64168	68353	+	1
Novelgene0120	scaffold75981	723162	724995	+	1
Novelgene0121	scaffold35771	195044	197590	+	1
Novelgene0122	scaffold740941	200337	205515	+	2
Novelgene0123	scaffold893405	49844	52317	+	1
Novelgene0124	scaffold65817	124813	128192	+	1
Novelgene0125	scaffold583511	65533	67362	+	1
Novelgene0126	scaffold583511	70939	75694	+	2
Novelgene0127	scaffold583511	228237	232013	+	3
Novelgene0128	scaffold803177	108279	111721	+	1
Novelgene0129	scaffold711451	95310	97902	+	1
Novelgene0130	scaffold243917	25859	28698	+	1
Novelgene0131	scaffold881831	177354	180149	+	1
Novelgene0132	scaffold830595	11433	13537	+	1
Novelgene0133	scaffold88861	108314	112614	+	5
Novelgene0134	scaffold77923	11150	12434	+	1
Novelgene0135	scaffold442575	503855	506537	+	1
Novelgene0136	scaffold684327	541074	542928	+	1
Novelgene0137	scaffold927011	12690	16698	+	1
Novelgene0138	scaffold366987	150076	153068	+	1
Novelgene0139	scaffold243043	1281	3863	+	1
Novelgene0140	scaffold156881	91264	92576	+	1
Novelgene0141	scaffold785287	114556	117000	+	1
Novelgene0142	scaffold382161	18262	21281	+	1
Novelgene0143	scaffold195263	138406	142923	+	1
Novelgene0144	scaffold195263	267505	270224	+	1
Novelgene0145	scaffold314403	84835	87509	+	1
Novelgene0146	scaffold972697	107519	112225	+	1
Novelgene0147	scaffold700995	24189	26892	+	1
Novelgene0148	scaffold991851	114456	115861	+	1
Novelgene0149	scaffold382169	555976	560436	+	1
Novelgene0150	scaffold789495	349715	352264	+	1
Novelgene0151	scaffold803219	76791	78771	+	1
Novelgene0152	scaffold677749	224151	227639	+	1
Novelgene0153	scaffold677749	323160	333789	+	1
Novelgene0154	scaffold915107	398233	399322	+	1
Novelgene0155	scaffold2885	87767	91259	+	1
Novelgene0156	scaffold69033	5718	10571	+	1
Novelgene0157	scaffold69033	719948	722353	+	1
Novelgene0158	scaffold1031951	23889	26918	+	1
Novelgene0159	scaffold598413	257129	259412	+	1
Novelgene0160	scaffold226135	169556	172228	+	1
Novelgene0161	scaffold1030959	6402	7155	+	1
Novelgene0162	scaffold798587	143912	145993	+	1
Novelgene0163	scaffold490535	101571	104047	+	1
Novelgene0164	scaffold274701	1222960	1224233	+	1
Novelgene0165	scaffold166689	406127	409197	+	1
Novelgene0166	scaffold382347	9822	14925	+	1
Novelgene0167	scaffold110397	6511	9454	+	1
Novelgene0168	scaffold109391	1314935	1318106	+	1
Novelgene0169	scaffold9469	620721	625112	+	1
Novelgene0170	scaffold9469	969844	972514	+	1
Novelgene0171	scaffold1029283	223448	227107	+	1
Novelgene0172	scaffold738441	201582	202431	+	1
Novelgene0173	scaffold175085	86166	88643	+	1
Novelgene0174	scaffold979179	783860	786910	+	1
Novelgene0175	scaffold899267	7524	10927	+	1
Novelgene0176	scaffold308523	54264	59407	+	4
Novelgene0177	scaffold986655	3649	7884	+	2
Novelgene0178	scaffold258901	329685	331716	+	1
Novelgene0179	scaffold90013	78823	88297	+	1
Novelgene0180	scaffold857583	137136	139631	+	1
Novelgene0181	scaffold172833	305459	308064	+	1
Novelgene0182	scaffold6303	604918	609892	+	1
Novelgene0183	scaffold541249	161808	164363	+	1
Novelgene0184	scaffold873383	59844	64101	+	2
Novelgene0185	scaffold873383	76984	79292	+	1
Novelgene0186	scaffold873383	85809	89091	+	1
Novelgene0187	scaffold873383	348953	351519	+	1
Novelgene0188	scaffold873383	1133142	1137355	+	1
Novelgene0189	scaffold752563	12054	15885	+	1
Novelgene0190	scaffold752563	203066	205195	+	1
Novelgene0191	scaffold752563	822438	826868	+	3
Novelgene0192	scaffold752563	1478544	1483137	+	3
Novelgene0193	scaffold752563	1530559	1535083	+	2
Novelgene0194	scaffold752563	1539937	1541089	+	1
Novelgene0195	scaffold752563	1814594	1819290	+	1
Novelgene0196	scaffold99831	73398	75134	+	1
Novelgene0197	scaffold135803	76635	81138	+	2
Novelgene0198	scaffold135803	132784	133667	+	1
Novelgene0199	scaffold763521	140636	143605	+	1
Novelgene0200	scaffold335145	50896	51750	+	1
Novelgene0201	scaffold335145	278961	283379	+	1
Novelgene0202	scaffold335145	288605	292364	+	1
Novelgene0203	scaffold915635	156062	164719	+	1
Novelgene0204	scaffold135029	85548	90625	+	2
Novelgene0205	scaffold304861	48867	53260	+	3
Novelgene0206	scaffold232873	469633	473233	+	1
Novelgene0207	scaffold825757	168604	171631	+	1
Novelgene0208	scaffold134777	1025765	1026942	+	1
Novelgene0209	scaffold919321	46619	50536	+	2
Novelgene0210	scaffold959243	155681	158836	+	1
Novelgene0211	scaffold959243	175691	179621	+	2
Novelgene0212	scaffold998957	102750	104907	+	1
Novelgene0213	scaffold934081	19978	47713	+	5
Novelgene0214	scaffold934081	172797	178482	+	1
Novelgene0215	scaffold588755	116572	123041	+	1
Novelgene0216	scaffold778781	323820	327638	+	1
Novelgene0217	scaffold778781	497115	500902	+	1
Novelgene0218	scaffold229845	19484	23819	+	1
Novelgene0219	scaffold594241	872296	876323	+	1
Novelgene0220	scaffold594241	1295934	1299400	+	2
Novelgene0221	scaffold310405	328105	332405	+	2
Novelgene0222	scaffold68289	27394	28774	+	1
Novelgene0223	scaffold198223	83817	88659	+	1
Novelgene0224	scaffold198223	372139	374631	+	1
Novelgene0225	scaffold722641	380046	384294	+	4
Novelgene0226	scaffold801635	300608	307863	+	2
Novelgene0227	scaffold801635	1503432	1506593	+	1
Novelgene0228	scaffold801635	1918258	1922053	+	1
Novelgene0229	scaffold801635	1951969	1955013	+	1
Novelgene0230	scaffold801635	2067848	2070104	+	1
Novelgene0231	scaffold620075	651862	661850	+	2
Novelgene0232	scaffold620075	1183612	1186290	+	1
Novelgene0233	scaffold620075	1187018	1189881	+	1
Novelgene0234	scaffold698539	262111	267186	+	1
Novelgene0235	scaffold698539	268965	272212	+	1
Novelgene0236	scaffold988495	100836	109198	+	2
Novelgene0237	scaffold988495	118305	122331	+	1
Novelgene0238	scaffold176847	256572	265186	+	2
Novelgene0239	scaffold213171	21487	25007	+	1
Novelgene0240	scaffold435929	210113	214538	+	1
Novelgene0241	scaffold414293	86626	91564	+	1
Novelgene0242	scaffold718023	107044	111374	+	1
Novelgene0243	scaffold57085	45326	50187	+	1
Novelgene0244	scaffold605625	206779	216416	+	3
Novelgene0245	scaffold605625	512353	514913	+	1
Novelgene0246	scaffold733399	83713	87826	+	2
Novelgene0247	scaffold612251	60494	63971	+	1
Novelgene0248	scaffold43375	417037	419981	+	1
Novelgene0249	scaffold161755	390818	395637	+	2
Novelgene0250	scaffold161755	397919	400260	+	1
Novelgene0251	scaffold161755	611450	615531	+	4
Novelgene0252	scaffold250833	50535	51554	+	1
Novelgene0253	scaffold988961	10256	13865	+	1
Novelgene0254	scaffold238769	14210	17808	+	1
Novelgene0255	scaffold238769	72722	79921	+	3
Novelgene0256	scaffold238769	80036	83039	+	1
Novelgene0257	scaffold238769	188717	193219	+	1
Novelgene0258	scaffold238769	1138902	1139676	+	1
Novelgene0259	scaffold238769	1852310	1853779	+	1
Novelgene0260	scaffold238769	2012619	2016269	+	1
Novelgene0261	scaffold937441	14995	17944	+	1
Novelgene0262	scaffold787277	622935	625505	+	2
Novelgene0263	scaffold454109	186367	189720	+	1
Novelgene0264	scaffold778557	517790	669008	+	7
Novelgene0265	scaffold778557	775868	779763	+	1
Novelgene0266	scaffold257433	148426	151882	+	1
Novelgene0267	scaffold39841	1736	5760	+	1
Novelgene0268	scaffold584669	68167	74842	+	1
Novelgene0269	scaffold11433	356042	360075	+	1
Novelgene0270	scaffold686195	165067	167059	+	1
Novelgene0271	scaffold672465	59611	61886	+	1
Novelgene0272	scaffold672465	64271	68306	+	1
Novelgene0273	scaffold805305	3596	9500	+	5
Novelgene0274	scaffold980157	110411	113190	+	1
Novelgene0275	scaffold1008591	15183	20231	+	1
Novelgene0276	scaffold261643	221644	223026	+	2
Novelgene0277	scaffold153955	179	1256	+	1
Novelgene0278	scaffold686971	63323	67692	+	1
Novelgene0279	scaffold506033	1795	5820	+	3
Novelgene0280	scaffold506033	66330	80289	+	1
Novelgene0281	scaffold527347	334686	339705	+	1
Novelgene0282	scaffold134919	249890	251357	+	2
Novelgene0283	scaffold290929	443043	446269	+	1
Novelgene0284	scaffold78877	243986	247135	+	1
Novelgene0285	scaffold370885	541826	544747	+	1
Novelgene0286	scaffold700771	530573	532096	+	1
Novelgene0287	scaffold681293	47867	52513	+	1
Novelgene0288	scaffold176661	112830	115532	+	1
Novelgene0289	scaffold870249	125697	129675	+	1
Novelgene0290	scaffold121083	253304	256975	+	1
Novelgene0291	scaffold830731	555281	559756	+	1
Novelgene0292	scaffold830731	583486	586264	+	1
Novelgene0293	scaffold830731	790024	794156	+	1
Novelgene0294	scaffold927213	224152	228632	+	1
Novelgene0295	scaffold927213	413800	417324	+	2
Novelgene0296	scaffold403451	14023	16025	+	1
Novelgene0297	scaffold792037	105297	108297	+	1
Novelgene0298	scaffold197259	186564	191208	+	2
Novelgene0299	scaffold290727	628949	636422	+	1
Novelgene0300	scaffold631917	225338	228159	+	1
Novelgene0301	scaffold631917	388546	416266	+	3
Novelgene0302	scaffold355207	443567	447712	+	1
Novelgene0303	scaffold922839	167496	171310	+	1
Novelgene0304	scaffold1042955	18744	21507	+	2
Novelgene0305	scaffold799665	628782	639566	+	2
Novelgene0306	scaffold461315	426820	431286	+	1
Novelgene0307	scaffold317497	21565	25742	+	1
Novelgene0308	scaffold317497	72714	84046	+	1
Novelgene0309	scaffold317497	84840	88435	+	2
Novelgene0310	scaffold317497	121123	123437	+	1
Novelgene0311	scaffold823979	50243	52896	+	1
Novelgene0312	scaffold823979	61295	64181	+	1
Novelgene0313	scaffold461313	49662	51819	+	1
Novelgene0314	scaffold461313	64767	66679	+	1
Novelgene0315	scaffold461313	67216	70559	+	1
Novelgene0316	scaffold976213	165816	171191	+	2
Novelgene0317	scaffold976213	183442	185073	+	1
Novelgene0318	scaffold295711	96276	98664	+	3
Novelgene0319	scaffold918479	106093	109959	+	1
Novelgene0320	scaffold87543	529935	535557	+	1
Novelgene0321	scaffold87543	577620	581318	+	2
Novelgene0322	scaffold133365	22090	24843	+	1
Novelgene0323	scaffold37609	193390	195711	+	1
Novelgene0324	scaffold37609	198591	201876	+	2
Novelgene0325	scaffold918477	290412	292817	+	1
Novelgene0326	scaffold704077	593727	598240	+	2
Novelgene0327	scaffold704077	604505	605578	+	1
Novelgene0328	scaffold254335	232515	233904	+	1
Novelgene0329	scaffold1037797	18961	32913	+	2
Novelgene0330	scaffold516169	117728	120594	+	1
Novelgene0331	scaffold516169	127157	129586	+	1
Novelgene0332	scaffold1031547	225033	228719	+	1
Novelgene0333	scaffold1031547	319611	326693	+	2
Novelgene0334	scaffold726631	104520	107429	+	1
Novelgene0335	scaffold726631	121288	124858	+	1
Novelgene0336	scaffold726631	255211	258398	+	1
Novelgene0337	scaffold720467	60645	60945	+	1
Novelgene0338	scaffold674453	446294	462870	+	2
Novelgene0339	scaffold834345	178296	182493	+	1
Novelgene0340	scaffold834345	374285	380676	+	2
Novelgene0341	scaffold638655	129612	136506	+	2
Novelgene0342	scaffold423067	597320	599454	+	1
Novelgene0343	scaffold89499	323298	326137	+	1
Novelgene0344	scaffold89499	328336	333290	+	2
Novelgene0345	scaffold22011	362832	366765	+	1
Novelgene0346	scaffold835341	775452	779697	+	1
Novelgene0347	scaffold569747	541219	545557	+	3
Novelgene0348	scaffold1018855	88062	89859	+	1
Novelgene0349	scaffold466835	1487	2106	+	1
Novelgene0350	scaffold47685	149782	152440	+	1
Novelgene0351	scaffold172297	74030	76521	+	1
Novelgene0352	scaffold735487	13943	15984	+	1
Novelgene0353	scaffold522851	62976	65846	+	1
Novelgene0354	scaffold522851	185484	188754	+	1
Novelgene0355	scaffold522851	243730	247274	+	1
Novelgene0356	scaffold821225	52172	58976	+	2
Novelgene0357	scaffold821225	66627	71621	+	1
Novelgene0358	scaffold824373	379697	382784	+	1
Novelgene0359	scaffold123853	109336	114305	+	1
Novelgene0360	scaffold123853	375149	377185	+	1
Novelgene0361	scaffold540921	10237	13418	+	1
Novelgene0362	scaffold670009	76025	85574	+	2
Novelgene0363	scaffold76443	141173	144216	+	1
Novelgene0364	scaffold76443	233594	236986	+	1
Novelgene0365	scaffold408583	737832	742012	+	1
Novelgene0366	scaffold41303	251499	253561	+	1
Novelgene0367	scaffold41303	974860	978773	+	1
Novelgene0368	scaffold905799	1903756	1905863	+	1
Novelgene0369	scaffold923949	1480240	1482357	+	1
Novelgene0370	scaffold553317	249792	254240	+	1
Novelgene0371	scaffold553317	266995	270205	+	2
Novelgene0372	scaffold398605	693406	697061	+	1
Novelgene0373	scaffold397121	5119	7016	+	1
Novelgene0374	scaffold1042601	317537	322295	+	2
Novelgene0375	scaffold1042601	699802	702677	+	1
Novelgene0376	scaffold292275	277950	282035	+	1
Novelgene0377	scaffold54473	692656	695619	+	1
Novelgene0378	scaffold54473	705697	708077	+	1
Novelgene0379	scaffold909809	678818	681122	+	1
Novelgene0380	scaffold271611	198481	199665	+	1
Novelgene0381	scaffold217467	56948	61558	+	1
Novelgene0382	scaffold52623	11020	16206	+	2
Novelgene0383	scaffold987883	559046	561491	+	1
Novelgene0384	scaffold969199	58870	68535	+	3
Novelgene0385	scaffold350515	256541	261158	+	1
Novelgene0386	scaffold16507	32787	35691	+	3
Novelgene0387	scaffold226121	887255	889771	+	1
Novelgene0388	scaffold883791	69529	72397	+	1
Novelgene0389	scaffold586363	208366	209751	+	1
Novelgene0390	scaffold586363	286545	290224	+	1
Novelgene0391	scaffold586363	900889	903615	+	1
Novelgene0392	scaffold173905	406500	409943	+	1
Novelgene0393	scaffold166101	23248	33231	+	1
Novelgene0394	scaffold816429	11757	17008	+	1
Novelgene0395	scaffold816429	23839	27477	+	1
Novelgene0396	scaffold274247	66307	71011	+	1
Novelgene0397	scaffold274247	109131	118114	+	4
Novelgene0398	scaffold274247	181291	197171	+	1
Novelgene0399	scaffold274247	296190	299875	+	1
Novelgene0400	scaffold283031	690229	694619	+	1
Novelgene0401	scaffold582309	164855	169187	+	1
Novelgene0402	scaffold884053	162501	167088	+	1
Novelgene0403	scaffold582307	389136	393740	+	1
Novelgene0404	scaffold582307	398160	402662	+	1
Novelgene0405	scaffold582307	412754	414347	+	1
Novelgene0406	scaffold533047	1004913	1009129	+	1
Novelgene0407	scaffold1006581	115709	120047	+	1
Novelgene0408	scaffold872397	140775	142757	+	1
Novelgene0409	scaffold872397	225540	229281	+	2
Novelgene0410	scaffold420067	35640	38327	+	1
Novelgene0411	scaffold420067	71353	74560	+	1
Novelgene0412	scaffold262513	10445	13495	+	1
Novelgene0413	scaffold95721	201168	203411	+	1
Novelgene0414	scaffold36231	214715	217164	+	1
Novelgene0415	scaffold485415	144837	148309	+	2
Novelgene0416	scaffold485415	221656	224845	+	1
Novelgene0417	scaffold485415	260131	264713	+	1
Novelgene0418	scaffold485415	290875	292458	+	1
Novelgene0419	scaffold434027	236403	239298	+	1
Novelgene0420	scaffold680813	53335	56006	+	1
Novelgene0421	scaffold182831	12180	14514	+	1
Novelgene0422	scaffold93607	152060	157325	+	2
Novelgene0423	scaffold93607	176166	181937	+	1
Novelgene0424	scaffold222269	321360	322003	+	1
Novelgene0425	scaffold323239	16754	23518	+	2
Novelgene0426	scaffold470963	204899	206095	+	1
Novelgene0427	scaffold427919	513	4517	+	3
Novelgene0428	scaffold427919	15657	18736	+	1
Novelgene0429	scaffold513675	1449	4633	+	1
Novelgene0430	scaffold226673	3394	6005	+	1
Novelgene0431	scaffold800819	133630	136746	+	1
Novelgene0432	scaffold971113	87919	92432	+	2
Novelgene0433	scaffold884691	65826	69256	+	1
Novelgene0434	scaffold300085	61340	62034	+	1
Novelgene0435	scaffold47313	232493	235269	+	1
Novelgene0436	scaffold934523	41525	45065	+	1
Novelgene0437	scaffold64353	8603	14601	+	1
Novelgene0438	scaffold413259	13637	19215	+	1
Novelgene0439	scaffold413259	120103	123287	+	1
Novelgene0440	scaffold392043	28747	31171	+	1
Novelgene0441	scaffold166171	34520	39697	+	1
Novelgene0442	scaffold9855	177753	183431	+	2
Novelgene0443	scaffold9855	210786	215919	+	1
Novelgene0444	scaffold9855	223680	230612	+	1
Novelgene0445	scaffold9855	233619	238536	+	1
Novelgene0446	scaffold987685	714626	718952	+	1
Novelgene0447	scaffold982419	629413	632365	+	1
Novelgene0448	scaffold982419	668713	670713	+	1
Novelgene0449	scaffold105827	5708	13986	+	2
Novelgene0450	scaffold654917	393946	400765	+	13
Novelgene0451	scaffold414201	115576	117755	+	1
Novelgene0452	scaffold190957	10275	15643	+	3
Novelgene0453	scaffold190957	57733	58110	+	1
Novelgene0454	scaffold147435	9626	12607	+	1
Novelgene0455	scaffold1027271	432	4907	+	1
Novelgene0456	scaffold934095	176952	177370	+	1
Novelgene0457	scaffold910265	67809	71057	+	1
Novelgene0458	scaffold84795	61836	67310	+	2
Novelgene0459	scaffold199379	87915	91130	+	1
Novelgene0460	scaffold946323	28159	34906	+	2
Novelgene0461	scaffold946323	53474	59258	+	1
Novelgene0462	scaffold79231	284351	286676	+	1
Novelgene0463	scaffold79231	705250	707291	+	1
Novelgene0464	scaffold189069	364289	367496	+	1
Novelgene0465	scaffold368797	124596	126564	+	1
Novelgene0466	scaffold866317	90438	95436	+	2
Novelgene0467	scaffold459511	237459	242287	+	2
Novelgene0468	scaffold459511	765736	767565	+	1
Novelgene0469	scaffold833553	286120	288106	+	1
Novelgene0470	scaffold942833	745382	758719	+	3
Novelgene0471	scaffold65821	21380	22632	+	1
Novelgene0472	scaffold1013965	574168	583949	+	1
Novelgene0473	scaffold1013965	589012	615853	+	2
Novelgene0474	scaffold276631	455679	456400	+	2
Novelgene0475	scaffold186007	470627	473619	+	1
Novelgene0476	scaffold186007	660212	664463	+	1
Novelgene0477	scaffold186007	877332	878377	+	1
Novelgene0478	scaffold135585	238841	241333	+	1
Novelgene0479	scaffold135585	999198	1000815	+	1
Novelgene0480	scaffold983457	581453	585592	+	1
Novelgene0481	scaffold463811	193552	196668	+	2
Novelgene0482	scaffold915177	45639	49139	+	4
Novelgene0483	scaffold465165	389979	394970	+	1
Novelgene0484	scaffold131849	156725	160441	+	1
Novelgene0485	scaffold450055	594956	599297	+	2
Novelgene0486	scaffold450055	911497	914697	+	1
Novelgene0487	scaffold1035995	194164	196444	+	1
Novelgene0488	scaffold686697	17212	19624	+	1
Novelgene0489	scaffold320421	45398	51835	+	3
Novelgene0490	scaffold320421	52550	58950	+	1
Novelgene0491	scaffold164087	94408	103599	+	2
Novelgene0492	scaffold832169	492751	496958	+	1
Novelgene0493	scaffold912257	86412	89805	+	1
Novelgene0494	scaffold996379	98447	99289	+	1
Novelgene0495	scaffold69905	148655	151869	+	1
Novelgene0496	scaffold213501	54478	56253	+	1
Novelgene0497	scaffold321571	223313	225690	+	1
Novelgene0498	scaffold380533	482543	484495	+	2
Novelgene0499	scaffold820667	37511	42307	+	1
Novelgene0500	scaffold820667	1522664	1527135	+	1
Novelgene0501	scaffold820667	1535690	1537138	+	1
Novelgene0502	scaffold820667	1774786	1777284	+	1
Novelgene0503	scaffold1001313	67898	69711	+	1
Novelgene0504	scaffold1019765	85074	86739	+	1
Novelgene0505	scaffold552037	237755	241232	+	1
Novelgene0506	scaffold623661	3882	7278	+	1
Novelgene0507	scaffold30067	5012	7108	+	1
Novelgene0508	scaffold30067	167422	170785	+	1
Novelgene0509	scaffold30067	217180	221510	+	1
Novelgene0510	scaffold159579	168668	172004	+	1
Novelgene0511	scaffold53373	67471	73275	+	1
Novelgene0512	scaffold118893	445449	448632	+	1
Novelgene0513	scaffold118893	475815	480343	+	1
Novelgene0514	scaffold591365	957998	960664	+	1
Novelgene0515	scaffold591365	961241	963076	+	1
Novelgene0516	scaffold591365	984696	987492	+	1
Novelgene0517	scaffold591365	1011093	1016973	+	2
Novelgene0518	scaffold591365	1466010	1475467	+	1
Novelgene0519	scaffold591365	1598475	1601325	+	1
Novelgene0520	scaffold591365	2058373	2061615	+	1
Novelgene0521	scaffold591365	3005564	3008460	+	1
Novelgene0522	scaffold49325	277214	282639	+	1
Novelgene0523	scaffold49325	316480	317944	+	1
Novelgene0524	scaffold416051	25419	28174	+	1
Novelgene0525	scaffold416051	169447	176061	+	1
Novelgene0526	scaffold918247	165996	170822	+	2
Novelgene0527	scaffold452573	2031944	2034728	+	1
Novelgene0528	scaffold507375	1235026	1237726	+	1
Novelgene0529	scaffold507375	1714129	1717647	+	1
Novelgene0530	scaffold460789	281104	286830	+	3
Novelgene0531	scaffold145771	8945	16234	+	2
Novelgene0532	scaffold932539	86601	92095	+	6
Novelgene0533	scaffold873527	228570	232200	+	1
Novelgene0534	scaffold188899	277553	279322	+	1
Novelgene0535	scaffold35343	637677	641160	+	1
Novelgene0536	scaffold128589	319128	322503	+	1
Novelgene0537	scaffold128589	503384	505990	+	1
Novelgene0538	scaffold766551	264807	266188	+	1
Novelgene0539	scaffold766551	272156	277361	+	1
Novelgene0540	scaffold766551	544920	548228	+	1
Novelgene0541	scaffold766551	552453	555554	+	1
Novelgene0542	scaffold766551	555751	560481	+	1
Novelgene0543	scaffold766551	953013	954995	+	1
Novelgene0544	scaffold962991	13496	17980	+	1
Novelgene0545	scaffold685483	13032	17430	+	1
Novelgene0546	scaffold865407	362458	366413	+	2
Novelgene0547	scaffold1032221	13054	17453	+	2
Novelgene0548	scaffold571301	361258	363349	+	1
Novelgene0549	scaffold571301	1047034	1048777	+	1
Novelgene0550	scaffold733181	104256	108912	+	1
Novelgene0551	scaffold733181	282320	285475	+	1
Novelgene0552	scaffold104451	167985	173384	+	2
Novelgene0553	scaffold235897	10770	14948	+	1
Novelgene0554	scaffold566553	742728	744677	+	1
Novelgene0555	scaffold566553	878456	881574	+	2
Novelgene0556	scaffold566553	940296	945972	+	1
Novelgene0557	scaffold566553	1113642	1117247	+	2
Novelgene0558	scaffold566553	1268900	1271803	+	1
Novelgene0559	scaffold566553	1274920	1282023	+	1
Novelgene0560	scaffold271535	82605	87128	+	4
Novelgene0561	scaffold20685	106963	109609	+	1
Novelgene0562	scaffold426081	9943	16286	+	2
Novelgene0563	scaffold113989	471767	476340	+	1
Novelgene0564	scaffold53701	98879	105403	+	1
Novelgene0565	scaffold1020077	310930	314275	+	1
Novelgene0566	scaffold1020077	364892	367259	+	1
Novelgene0567	scaffold1020077	378411	382099	+	1
Novelgene0568	scaffold446549	199541	202142	+	1
Novelgene0569	scaffold182121	470013	476588	+	1
Novelgene0570	scaffold977193	12563	15663	+	1
Novelgene0571	scaffold714337	104481	104792	+	1
Novelgene0572	scaffold714337	112278	117206	+	2
Novelgene0573	scaffold647971	156228	163218	+	1
Novelgene0574	scaffold647971	165593	170983	+	1
Novelgene0575	scaffold647971	294663	297655	+	1
Novelgene0576	scaffold994443	1387770	1390841	+	1
Novelgene0577	scaffold612329	512768	517257	+	4
Novelgene0578	scaffold362717	17596	20271	+	1
Novelgene0579	scaffold26071	799801	802320	+	1
Novelgene0580	scaffold762033	279452	284335	+	1
Novelgene0581	scaffold35757	163068	169920	+	3
Novelgene0582	scaffold88999	106502	109046	+	1
Novelgene0583	scaffold117901	269597	273688	+	1
Novelgene0584	scaffold829307	11480	14832	+	1
Novelgene0585	scaffold829307	16397	20411	+	1
Novelgene0586	scaffold222741	141468	143500	+	2
Novelgene0587	scaffold176469	153911	156253	+	1
Novelgene0588	scaffold176469	250300	253782	+	1
Novelgene0589	scaffold145195	307866	310552	+	2
Novelgene0590	scaffold145195	822237	824439	+	1
Novelgene0591	scaffold510745	564472	567378	+	2
Novelgene0592	scaffold209417	229495	233419	+	1
Novelgene0593	scaffold209417	240125	244223	+	2
Novelgene0594	scaffold209417	249030	254275	+	2
Novelgene0595	scaffold137507	107877	111417	+	2
Novelgene0596	scaffold795579	215196	216552	+	1
Novelgene0597	scaffold864757	498842	504749	+	2
Novelgene0598	scaffold864757	519421	521435	+	1
Novelgene0599	scaffold515313	617187	621857	+	1
Novelgene0600	scaffold515313	634429	636442	+	1
Novelgene0601	scaffold515313	640206	644811	+	1
Novelgene0602	scaffold515313	652174	654435	+	1
Novelgene0603	scaffold401833	128923	130898	+	3
Novelgene0604	scaffold629933	39668	40984	+	1
Novelgene0605	scaffold691499	184880	188877	+	1
Novelgene0606	scaffold872019	238017	241147	+	1
Novelgene0607	scaffold397133	352315	354714	+	1
Novelgene0608	scaffold656355	339220	341979	+	1
Novelgene0609	scaffold696823	72923	77615	+	1
Novelgene0610	scaffold696823	559604	562270	+	1
Novelgene0611	scaffold540733	262640	265864	+	1
Novelgene0612	scaffold218409	493617	499914	+	5
Novelgene0613	scaffold414961	130748	134834	+	1
Novelgene0614	scaffold414961	146981	149437	+	1
Novelgene0615	scaffold414961	162254	166324	+	1
Novelgene0616	scaffold946023	155404	158093	+	1
Novelgene0617	scaffold980115	72420	75620	+	1
Novelgene0618	scaffold621651	35697	38334	+	1
Novelgene0619	scaffold12857	106207	108252	+	1
Novelgene0620	scaffold12857	109075	111081	+	1
Novelgene0621	scaffold12857	121535	124631	+	1
Novelgene0622	scaffold545385	301105	304410	+	1
Novelgene0623	scaffold545385	601889	604708	+	2
Novelgene0624	scaffold728721	319027	323044	+	1
Novelgene0625	scaffold522937	62584	64755	+	1
Novelgene0626	scaffold93273	6284	9386	+	1
Novelgene0627	scaffold93273	536108	541054	+	1
Novelgene0628	scaffold323333	157011	159338	+	1
Novelgene0629	scaffold136271	878726	882626	+	1
Novelgene0630	scaffold16519	38909	41404	+	1
Novelgene0631	scaffold16519	70204	72885	+	1
Novelgene0632	scaffold93077	68236	71363	+	1
Novelgene0633	scaffold93077	74071	77214	+	1
Novelgene0634	scaffold730985	88466	89570	+	1
Novelgene0635	scaffold730985	104195	106669	+	2
Novelgene0636	scaffold111237	25678	29755	+	2
Novelgene0637	scaffold111237	368166	370975	+	1
Novelgene0638	scaffold702931	175114	176787	+	1
Novelgene0639	scaffold905923	125374	127779	+	1
Novelgene0640	scaffold905923	147526	149815	+	1
Novelgene0641	scaffold905923	237685	239630	+	1
Novelgene0642	scaffold47257	133052	138347	+	1
Novelgene0643	scaffold289077	40380	42632	+	1
Novelgene0644	scaffold349083	2708	8458	+	2
Novelgene0645	scaffold758371	506395	510488	+	1
Novelgene0646	scaffold758371	535912	538460	+	1
Novelgene0647	scaffold758371	540764	542455	+	2
Novelgene0648	scaffold424559	1131	5490	+	1
Novelgene0649	scaffold22753	194114	196009	+	2
Novelgene0650	scaffold22753	199596	202773	+	1
Novelgene0651	scaffold279713	302346	305768	+	1
Novelgene0652	scaffold279713	1888881	1892164	+	1
Novelgene0653	scaffold939153	1040681	1043765	+	1
Novelgene0654	scaffold1007481	97515	101509	+	1
Novelgene0655	scaffold1007481	149523	150434	+	1
Novelgene0656	scaffold957179	457733	461280	+	1
Novelgene0657	scaffold957179	470568	475491	+	1
Novelgene0658	scaffold903143	64750	66415	+	1
Novelgene0659	scaffold634537	1	3362	+	1
Novelgene0660	scaffold670691	116168	118046	+	1
Novelgene0661	scaffold65109	197895	200052	+	1
Novelgene0662	scaffold74117	139246	142142	+	1
Novelgene0663	scaffold680827	52997	54227	+	1
Novelgene0664	scaffold680827	460575	469057	+	2
Novelgene0665	scaffold874983	345157	349408	+	3
Novelgene0666	scaffold879275	133597	137372	+	1
Novelgene0667	scaffold906529	652504	656984	+	1
Novelgene0668	scaffold906529	699486	701898	+	1
Novelgene0669	scaffold255941	54751	56229	+	1
Novelgene0670	scaffold255941	57827	61216	+	1
Novelgene0671	scaffold659067	1009468	1014503	+	2
Novelgene0672	scaffold973679	391971	396750	+	1
Novelgene0673	scaffold309903	22220	25465	+	2
Novelgene0674	scaffold441267	1319	2631	+	1
Novelgene0675	scaffold897855	492020	493590	+	1
Novelgene0676	scaffold827461	425668	429009	+	2
Novelgene0677	scaffold32581	26765	30584	+	1
Novelgene0678	scaffold387089	894166	900406	+	2
Novelgene0679	scaffold9533	24854	28981	+	1
Novelgene0680	scaffold509253	156142	161205	+	2
Novelgene0681	scaffold867017	139434	141687	+	1
Novelgene0682	scaffold867017	189975	193258	+	1
Novelgene0683	scaffold867017	200937	203377	+	1
Novelgene0684	scaffold867017	797897	803397	+	1
Novelgene0685	scaffold867017	807594	811787	+	1
Novelgene0686	scaffold867017	828606	832542	+	1
Novelgene0687	scaffold867017	1006690	1008626	+	1
Novelgene0688	scaffold867017	1845889	1851406	+	2
Novelgene0689	scaffold867017	2363342	2368478	+	2
Novelgene0690	scaffold811733	12207	15402	+	1
Novelgene0691	scaffold811733	39414	43820	+	1
Novelgene0692	scaffold553351	501498	506054	+	3
Novelgene0693	scaffold191543	244806	248055	+	1
Novelgene0694	scaffold435129	64067	64559	+	1
Novelgene0695	scaffold27115	9360	10784	+	1
Novelgene0696	scaffold140313	163931	165671	+	1
Novelgene0697	scaffold71419	303870	305116	+	1
Novelgene0698	scaffold706383	853208	857072	+	1
Novelgene0699	scaffold236141	15856	18552	+	2
Novelgene0700	scaffold42319	649975	653870	+	1
Novelgene0701	scaffold605517	41167	44366	+	1
Novelgene0702	scaffold970729	428676	433247	+	1
Novelgene0703	scaffold94911	563133	564291	+	1
Novelgene0704	scaffold94911	568851	573176	+	1
Novelgene0705	scaffold450229	62988	68049	+	1
Novelgene0706	scaffold450229	250888	252807	+	1
Novelgene0707	scaffold632669	612494	614657	+	1
Novelgene0708	scaffold632669	1043365	1048993	+	1
Novelgene0709	scaffold397917	432543	435514	+	1
Novelgene0710	scaffold8317	162931	164824	+	1
Novelgene0711	scaffold8317	209029	210859	+	2
Novelgene0712	scaffold23969	89556	91622	+	1
Novelgene0713	scaffold393207	153853	156659	+	3
Novelgene0714	scaffold36561	121302	122821	+	1
Novelgene0715	scaffold480617	1	2160	+	1
Novelgene0716	scaffold136795	865740	866784	+	1
Novelgene0717	scaffold136795	1027384	1031704	+	1
Novelgene0718	scaffold360639	517289	520017	+	1
Novelgene0719	scaffold360639	1454225	1456172	+	3
Novelgene0720	scaffold360639	1681261	1683310	+	1
Novelgene0721	scaffold360639	1827386	1831123	+	1
Novelgene0722	scaffold1039427	2921	5750	+	2
Novelgene0723	scaffold184217	219257	222398	+	1
Novelgene0724	scaffold845803	76829	87739	+	2
Novelgene0725	scaffold682727	67387	69603	+	1
Novelgene0726	scaffold989763	223086	230644	+	3
Novelgene0727	scaffold867875	181669	185882	+	1
Novelgene0728	scaffold875963	203276	207515	+	1
Novelgene0729	scaffold133619	574365	619227	+	1
Novelgene0730	scaffold133619	1137531	1139263	+	1
Novelgene0731	scaffold585491	137263	140391	+	1
Novelgene0732	scaffold585491	251733	255065	+	1
Novelgene0733	scaffold87947	473012	474848	+	2
Novelgene0734	scaffold189613	126127	130350	+	1
Novelgene0735	scaffold517369	108925	112602	+	1
Novelgene0736	scaffold197491	308473	335906	+	1
Novelgene0737	scaffold529593	17324	18796	+	1
Novelgene0738	scaffold1020853	137134	164727	+	7
Novelgene0739	scaffold493429	201392	208714	+	1
Novelgene0740	scaffold224733	74465	78301	+	1
Novelgene0741	scaffold477751	122359	128446	+	1
Novelgene0742	scaffold477751	244588	249871	+	2
Novelgene0743	scaffold225609	386177	394580	+	3
Novelgene0744	scaffold225609	396821	401175	+	1
Novelgene0745	scaffold269885	59199	60925	+	1
Novelgene0746	scaffold269885	316702	321590	+	1
Novelgene0747	scaffold269885	534930	537771	+	1
Novelgene0748	scaffold269885	590527	594525	+	1
Novelgene0749	scaffold626283	14382	18767	+	1
Novelgene0750	scaffold432977	602283	604786	+	1
Novelgene0751	scaffold432977	615768	620300	+	1
Novelgene0752	scaffold432977	1123885	1124903	+	1
Novelgene0753	scaffold432977	1581463	1584718	+	1
Novelgene0754	scaffold984489	536828	541943	+	1
Novelgene0755	scaffold94611	214350	217207	+	1
Novelgene0756	scaffold932143	155522	157588	+	1
Novelgene0757	scaffold2681	49635	56016	+	1
Novelgene0758	scaffold783009	486078	505890	+	2
Novelgene0759	scaffold475871	8538	10603	+	1
Novelgene0760	scaffold449967	241293	244124	+	1
Novelgene0761	scaffold299451	433669	437927	+	1
Novelgene0762	scaffold738653	99450	103930	+	2
Novelgene0763	scaffold738653	115070	118937	+	1
Novelgene0764	scaffold910015	380830	384119	+	1
Novelgene0765	scaffold886177	3803	5041	+	1
Novelgene0766	scaffold709887	145240	148879	+	1
Novelgene0767	scaffold709887	238081	242581	+	1
Novelgene0768	scaffold709887	265145	269291	+	1
Novelgene0769	scaffold751093	60982	65399	+	1
Novelgene0770	scaffold751093	65963	66143	+	1
Novelgene0771	scaffold681567	34834	40165	+	3
Novelgene0772	scaffold672683	143531	147281	+	1
Novelgene0773	scaffold921661	529106	532226	+	1
Novelgene0774	scaffold921661	553491	556476	+	1
Novelgene0775	scaffold725251	4563	53228	+	1
Novelgene0776	scaffold611265	136525	139294	+	1
Novelgene0777	scaffold611265	145674	148032	+	2
Novelgene0778	scaffold611265	241191	243825	+	1
Novelgene0779	scaffold88435	588270	592233	+	3
Novelgene0780	scaffold436783	556873	563503	+	1
Novelgene0781	scaffold436783	635398	643053	+	2
Novelgene0782	scaffold436783	654812	657300	+	1
Novelgene0783	scaffold666215	110202	113286	+	1
Novelgene0784	scaffold666215	631720	635538	+	1
Novelgene0785	scaffold370427	828339	829930	+	1
Novelgene0786	scaffold944697	197717	200238	+	1
Novelgene0787	scaffold38537	563711	565756	+	1
Novelgene0788	scaffold38537	575642	579850	+	1
Novelgene0789	scaffold38537	582105	585013	+	1
Novelgene0790	scaffold694813	12795	15840	+	1
Novelgene0791	scaffold15873	8772	10983	+	1
Novelgene0792	scaffold690335	335221	338701	+	1
Novelgene0793	scaffold641167	59367	63812	+	1
Novelgene0794	scaffold821077	351078	359692	+	5
Novelgene0795	scaffold821077	516774	531028	+	3
Novelgene0796	scaffold821077	534044	537155	+	1
Novelgene0797	scaffold821077	730733	782146	+	8
Novelgene0798	scaffold451311	74464	95571	+	1
Novelgene0799	scaffold850577	480965	485590	+	1
Novelgene0800	scaffold994033	36589	39347	+	1
Novelgene0801	scaffold706027	409357	412209	+	2
Novelgene0802	scaffold253801	6083	10630	+	1
Novelgene0803	scaffold522055	10159	12299	+	1
Novelgene0804	scaffold1035511	1	1752	+	1
Novelgene0805	scaffold1035511	36834	39316	+	1
Novelgene0806	scaffold963655	116092	119137	+	1
Novelgene0807	scaffold59669	237477	240896	+	1
Novelgene0808	scaffold781647	326899	329771	+	1
Novelgene0809	scaffold781647	330497	335181	+	1
Novelgene0810	scaffold980567	273937	285369	+	2
Novelgene0811	scaffold980567	507455	509348	+	1
Novelgene0812	scaffold145507	87435	89865	+	1
Novelgene0813	scaffold932455	53019	58063	+	1
Novelgene0814	scaffold932455	184979	189804	+	1
Novelgene0815	scaffold636587	1568378	1569320	+	1
Novelgene0816	scaffold718109	46632	51478	+	7
Novelgene0817	scaffold704389	109548	114337	+	1
Novelgene0818	scaffold822481	149757	150706	+	1
Novelgene0819	scaffold747423	192897	195768	+	1
Novelgene0820	scaffold747423	1783667	1786764	+	1
Novelgene0821	scaffold747423	1958742	1960963	+	1
Novelgene0822	scaffold747423	1995726	2000343	+	2
Novelgene0823	scaffold216911	169519	172201	+	1
Novelgene0824	scaffold216911	255196	257117	+	1
Novelgene0825	scaffold805427	262561	267960	+	1
Novelgene0826	scaffold805427	270451	273062	+	1
Novelgene0827	scaffold805427	276970	281212	+	1
Novelgene0828	scaffold14471	78406	80027	+	1
Novelgene0829	scaffold585883	788	6419	+	2
Novelgene0830	scaffold956981	841895	845104	+	1
Novelgene0831	scaffold306723	128794	134667	+	3
Novelgene0832	scaffold86217	359820	361539	+	1
Novelgene0833	scaffold1029585	45178	49206	+	5
Novelgene0834	scaffold11401	78951	80542	+	1
Novelgene0835	scaffold220955	156680	159446	+	1
Novelgene0836	scaffold171755	187236	192343	+	1
Novelgene0837	scaffold171755	730702	735690	+	1
Novelgene0838	scaffold171755	842820	846379	+	1
Novelgene0839	scaffold171755	1009557	1012384	+	1
Novelgene0840	scaffold171755	1029743	1032482	+	1
Novelgene0841	scaffold171755	1051503	1054470	+	1
Novelgene0842	scaffold171755	1078849	1083443	+	1
Novelgene0843	scaffold171755	1247780	1249288	+	1
Novelgene0844	scaffold485669	191851	193748	+	1
Novelgene0845	scaffold485669	199498	202145	+	1
Novelgene0846	scaffold288437	79461	83112	+	2
Novelgene0847	scaffold468329	102516	105772	+	2
Novelgene0848	scaffold373031	5734	6999	+	1
Novelgene0849	scaffold97109	432428	456788	+	1
Novelgene0850	scaffold97109	555496	557407	+	1
Novelgene0851	scaffold97109	1398980	1403435	+	1
Novelgene0852	scaffold97109	2094986	2097272	+	1
Novelgene0853	scaffold446343	62037	63290	+	1
Novelgene0854	scaffold54135	285863	289773	+	1
Novelgene0855	scaffold54135	313803	318753	+	1
Novelgene0856	scaffold638747	1592820	1595390	+	1
Novelgene0857	scaffold972759	380	2566	+	1
Novelgene0858	scaffold348217	10278	13703	+	3
Novelgene0859	scaffold348217	313430	315954	+	1
Novelgene0860	scaffold842589	1404983	1406763	+	1
Novelgene0861	scaffold5265	419164	421936	+	1
Novelgene0862	scaffold967315	608214	611269	+	1
Novelgene0863	scaffold967315	831364	836702	+	2
Novelgene0864	scaffold158031	427673	432408	+	1
Novelgene0865	scaffold158031	444103	447060	+	1
Novelgene0866	scaffold158031	447779	452373	+	1
Novelgene0867	scaffold149193	39263	43040	+	1
Novelgene0868	scaffold879045	167922	172439	+	1
Novelgene0869	scaffold545573	46312	46801	+	1
Novelgene0870	scaffold872003	63696	68283	+	1
Novelgene0871	scaffold530825	162692	182075	+	2
Novelgene0872	scaffold530825	529135	531969	+	1
Novelgene0873	scaffold530825	739084	741089	+	1
Novelgene0874	scaffold200489	58644	61275	+	1
Novelgene0875	scaffold655549	19201	22545	+	2
Novelgene0876	scaffold48771	553383	554962	+	1
Novelgene0877	scaffold20479	50565	54335	+	1
Novelgene0878	scaffold379411	170580	173754	+	1
Novelgene0879	scaffold785187	562371	563836	+	1
Novelgene0880	scaffold607701	36133	40256	+	1
Novelgene0881	scaffold541899	33350	38286	+	1
Novelgene0882	scaffold694523	53453	56178	+	1
Novelgene0883	scaffold731449	369593	373271	+	1
Novelgene0884	scaffold236655	174498	179707	+	2
Novelgene0885	scaffold236301	679434	683344	+	1
Novelgene0886	scaffold236301	719942	723281	+	1
Novelgene0887	scaffold1004473	185641	186759	+	1
Novelgene0888	scaffold1004473	209881	212633	+	1
Novelgene0889	scaffold602771	354970	356046	+	1
Novelgene0890	scaffold602771	358798	360286	+	1
Novelgene0891	scaffold602771	363058	365093	+	1
Novelgene0892	scaffold479359	655124	656038	+	1
Novelgene0893	scaffold377993	248206	249709	+	1
Novelgene0894	scaffold122547	1052395	1056539	+	1
Novelgene0895	scaffold122547	1296207	1296802	+	1
Novelgene0896	scaffold587783	179050	182310	+	1
Novelgene0897	scaffold587783	184467	188664	+	1
Novelgene0898	scaffold794009	783253	786979	+	1
Novelgene0899	scaffold362927	637475	640531	+	1
Novelgene0900	scaffold799559	7248	7763	+	1
Novelgene0901	scaffold870713	376746	379481	+	1
Novelgene0902	scaffold870713	991085	995618	+	1
Novelgene0903	scaffold870713	1006394	1008610	+	1
Novelgene0904	scaffold870713	1856216	1923794	+	3
Novelgene0905	scaffold94457	608028	610306	+	1
Novelgene0906	scaffold764979	280739	286199	+	1
Novelgene0907	scaffold107823	25300	30131	+	2
Novelgene0908	scaffold1041269	1329790	1332663	+	2
Novelgene0909	scaffold880429	113385	115672	+	1
Novelgene0910	scaffold880351	4342	8123	+	2
Novelgene0911	scaffold880351	238248	243634	+	2
Novelgene0912	scaffold112417	417707	418978	+	1
Novelgene0913	scaffold734619	10930	11327	+	1
Novelgene0914	scaffold146183	19574	22675	+	1
Novelgene0915	scaffold146183	24873	30682	+	3
Novelgene0916	scaffold776857	62680	64680	+	1
Novelgene0917	scaffold876591	783449	793695	+	4
Novelgene0918	scaffold202981	763206	765671	+	1
Novelgene0919	scaffold202981	771606	776290	+	1
Novelgene0920	scaffold598109	769	2208	+	1
Novelgene0921	scaffold979387	24130	25320	+	1
Novelgene0922	scaffold818395	36829	40501	+	1
Novelgene0923	scaffold947369	266068	268200	+	1
Novelgene0924	scaffold513277	49203	53359	+	1
Novelgene0925	scaffold513277	77481	80973	+	2
Novelgene0926	scaffold513277	139024	142575	+	1
Novelgene0927	scaffold430305	22036	24384	+	1
Novelgene0928	scaffold646101	8375	10803	+	1
Novelgene0929	scaffold646101	138148	139598	+	1
Novelgene0930	scaffold875001	3990	7446	+	2
Novelgene0931	scaffold427849	306601	308713	+	1
Novelgene0932	scaffold953295	243322	251229	+	1
Novelgene0933	scaffold203341	552878	557444	+	1
Novelgene0934	scaffold890587	200259	202745	+	1
Novelgene0935	scaffold890587	296784	300946	+	2
Novelgene0936	scaffold320153	120844	123349	+	1
Novelgene0937	scaffold150461	503934	506935	+	1
Novelgene0938	scaffold980361	125844	130477	+	1
Novelgene0939	scaffold646321	183976	190763	+	2
Novelgene0940	scaffold286201	45847	59623	+	2
Novelgene0941	scaffold286201	202628	207504	+	1
Novelgene0942	scaffold902893	266218	269269	+	1
Novelgene0943	scaffold292743	5035	10127	+	4
Novelgene0944	scaffold1027659	7368	9917	+	1
Novelgene0945	scaffold901763	93289	94670	+	1
Novelgene0946	scaffold318657	24615	28373	+	1
Novelgene0947	scaffold833535	244113	249150	+	1
Novelgene0948	scaffold7359	73824	76737	+	1
Novelgene0949	scaffold7359	243221	274707	+	1
Novelgene0950	scaffold996777	519575	523442	+	1
Novelgene0951	scaffold996777	1191612	1193907	+	1
Novelgene0952	scaffold249451	759180	761974	+	1
Novelgene0953	scaffold249451	763636	766752	+	1
Novelgene0954	scaffold132101	211076	241362	+	7
Novelgene0955	scaffold18195	66530	68199	+	1
Novelgene0956	scaffold472105	109358	112001	+	1
Novelgene0957	scaffold886905	14284	19454	+	1
Novelgene0958	scaffold886905	69912	73651	+	1
Novelgene0959	scaffold498745	152262	153930	+	1
Novelgene0960	scaffold82483	49835	54404	+	1
Novelgene0961	scaffold360147	1	1170	+	1
Novelgene0962	scaffold674913	351080	354530	+	1
Novelgene0963	scaffold674913	518039	520790	+	1
Novelgene0964	scaffold674913	642863	646959	+	1
Novelgene0965	scaffold258283	366850	370823	+	1
Novelgene0966	scaffold682719	106975	110303	+	1
Novelgene0967	scaffold471965	412843	419404	+	2
Novelgene0968	scaffold316119	377381	385388	+	4
Novelgene0969	scaffold676227	362805	365012	+	1
Novelgene0970	scaffold676227	756098	873749	+	2
Novelgene0971	scaffold346547	494967	496141	+	1
Novelgene0972	scaffold467487	1147677	1149889	+	1
Novelgene0973	scaffold467487	1856026	1860486	+	1
Novelgene0974	scaffold467487	1863078	1866721	+	1
Novelgene0975	scaffold467487	2031639	2034150	+	1
Novelgene0976	scaffold646257	822600	934576	+	23
Novelgene0977	scaffold646257	991993	995056	+	1
Novelgene0978	scaffold646257	996428	996522	+	1
Novelgene0979	scaffold646257	1019936	1032850	+	4
Novelgene0980	scaffold588307	50763	52118	+	1
Novelgene0981	scaffold1022755	283429	299578	+	2
Novelgene0982	scaffold1001663	66556	70567	+	2
Novelgene0983	scaffold651103	114245	118019	+	1
Novelgene0984	scaffold651103	120026	122420	+	1
Novelgene0985	scaffold663753	382994	385860	+	1
Novelgene0986	scaffold663753	1488494	1498753	+	3
Novelgene0987	scaffold432943	87767	92812	+	1
Novelgene0988	scaffold8943	11127	13724	+	1
Novelgene0989	scaffold790335	95876	99282	+	1
Novelgene0990	scaffold889951	124226	124871	+	1
Novelgene0991	scaffold889951	375999	377420	+	1
Novelgene0992	scaffold948597	13932	16402	+	2
Novelgene0993	scaffold190931	30973	34946	+	2
Novelgene0994	scaffold190931	181210	183779	+	1
Novelgene0995	scaffold785057	1130555	1131586	+	1
Novelgene0996	scaffold958347	433072	438432	+	1
Novelgene0997	scaffold958347	450087	452812	+	1
Novelgene0998	scaffold958347	476627	480451	+	1
Novelgene0999	scaffold577911	53843	58592	+	2
Novelgene1000	scaffold330521	14250	17475	+	1
Novelgene1001	scaffold385049	209208	211389	+	1
Novelgene1002	scaffold697543	321708	422068	+	1
Novelgene1003	scaffold996827	122110	131084	+	2
Novelgene1004	scaffold239687	58156	61700	+	1
Novelgene1005	scaffold854285	102216	105649	+	2
Novelgene1006	scaffold57613	403687	406883	+	1
Novelgene1007	scaffold57613	553206	556030	+	1
Novelgene1008	scaffold737661	80846	83333	+	1
Novelgene1009	scaffold786519	57641	62801	+	1
Novelgene1010	scaffold786519	249479	251242	+	1
Novelgene1011	scaffold615171	266223	270065	+	1
Novelgene1012	scaffold615171	271574	275060	+	1
Novelgene1013	scaffold615171	477962	483817	+	1
Novelgene1014	scaffold615171	485125	488434	+	2
Novelgene1015	scaffold615171	556214	558643	+	1
Novelgene1016	scaffold615171	1291262	1295170	+	1
Novelgene1017	scaffold411387	533607	536759	+	1
Novelgene1018	scaffold440747	102394	104860	+	1
Novelgene1019	scaffold13872766	1079	1347	+	1
Novelgene1020	scaffold622745	115906	116727	+	1
Novelgene1021	scaffold622745	354791	359381	+	1
Novelgene1022	scaffold622745	431105	432745	+	1
Novelgene1023	scaffold622745	603036	605482	+	1
Novelgene1024	scaffold20275	131290	134908	+	1
Novelgene1025	scaffold53353	524251	526939	+	1
Novelgene1026	scaffold125113	376192	381202	+	1
Novelgene1027	scaffold125113	381366	391536	+	3
Novelgene1028	scaffold1035189	83304	90709	+	1
Novelgene1029	scaffold1035189	121282	127268	+	2
Novelgene1030	scaffold1035189	259379	261710	+	1
Novelgene1031	scaffold1039193	22981	26765	+	1
Novelgene1032	scaffold937925	289525	291801	+	1
Novelgene1033	scaffold436791	115869	118685	+	1
Novelgene1034	scaffold75125	323963	325958	+	1
Novelgene1035	scaffold186205	85050	88622	+	1
Novelgene1036	scaffold186205	94578	100679	+	3
Novelgene1037	scaffold186205	120425	122862	+	1
Novelgene1038	scaffold186205	507992	512316	+	1
Novelgene1039	scaffold394139	518961	520272	+	1
Novelgene1040	scaffold297983	254230	259268	+	1
Novelgene1041	scaffold297983	313878	316784	+	1
Novelgene1042	scaffold297983	329609	333201	+	1
Novelgene1043	scaffold297983	486157	488164	+	1
Novelgene1044	scaffold954133	26529	29209	+	1
Novelgene1045	scaffold954133	137087	139792	+	1
Novelgene1046	scaffold556689	162837	164592	+	1
Novelgene1047	scaffold851091	386726	388310	+	1
Novelgene1048	scaffold201295	29220	31538	+	1
Novelgene1049	scaffold610485	81451	82113	+	1
Novelgene1050	scaffold325439	1109151	1112658	+	1
Novelgene1051	scaffold805061	545142	548974	+	1
Novelgene1052	scaffold107601	3	1797	+	1
Novelgene1053	scaffold107601	5226	11765	+	3
Novelgene1054	scaffold58587	201788	206125	+	1
Novelgene1055	scaffold58587	215153	220173	+	2
Novelgene1056	scaffold989535	885722	888539	+	1
Novelgene1057	scaffold989535	1675478	1679064	+	1
Novelgene1058	scaffold662489	286749	289017	+	1
Novelgene1059	scaffold568373	165864	168281	+	1
Novelgene1060	scaffold957181	479813	484414	+	1
Novelgene1061	scaffold4985	497402	500766	+	1
Novelgene1062	scaffold842779	43319	47263	+	2
Novelgene1063	scaffold842779	248274	252621	+	1
Novelgene1064	scaffold799037	6707	7909	+	1
Novelgene1065	scaffold158283	147927	161184	+	1
Novelgene1066	scaffold997967	244432	249900	+	1
Novelgene1067	scaffold989247	23406	27091	+	1
Novelgene1068	scaffold982989	505911	509272	+	1
Novelgene1069	scaffold777069	478149	479067	+	1
Novelgene1070	scaffold447199	101588	103518	+	3
Novelgene1071	scaffold5585	541518	544556	+	1
Novelgene1072	scaffold5585	1267455	1267657	+	1
Novelgene1073	scaffold669801	9854	15172	+	1
Novelgene1074	scaffold669801	60872	62997	+	1
Novelgene1075	scaffold126657	297740	299586	+	1
Novelgene1076	scaffold277459	249151	252508	+	1
Novelgene1077	scaffold8647	124614	127788	+	1
Novelgene1078	scaffold65127	122122	128764	+	2
Novelgene1079	scaffold403075	302040	305114	+	1
Novelgene1080	scaffold403075	368606	371194	+	1
Novelgene1081	scaffold847739	100579	104346	+	1
Novelgene1082	scaffold683855	4270	6650	+	1
Novelgene1083	scaffold446377	212303	215845	+	1
Novelgene1084	scaffold446377	243121	246992	+	1
Novelgene1085	scaffold446377	395427	399123	+	1
Novelgene1086	scaffold161833	4084	8678	+	1
Novelgene1087	scaffold161833	18607	21970	+	1
Novelgene1088	scaffold498063	77778	80450	+	1
Novelgene1089	scaffold498063	449977	451405	+	1
Novelgene1090	scaffold498063	1492939	1501097	+	4
Novelgene1091	scaffold498063	1504029	1506740	+	1
Novelgene1092	scaffold498063	4018356	4021947	+	1
Novelgene1093	scaffold498063	4045015	4048221	+	1
Novelgene1094	scaffold498063	6726633	6730968	+	2
Novelgene1095	scaffold985183	519219	523455	+	1
Novelgene1096	scaffold985183	1057739	1062700	+	1
Novelgene1097	scaffold985183	1066826	1072265	+	1
Novelgene1098	scaffold990617	156219	159209	+	1
Novelgene1099	scaffold990617	202097	206303	+	1
Novelgene1100	scaffold541669	8016	12869	+	2
Novelgene1101	scaffold638177	1114623	1138369	+	3
Novelgene1102	scaffold638177	2089757	2091378	+	1
Novelgene1103	scaffold638177	2094540	2099189	+	2
Novelgene1104	scaffold638177	2604085	2607657	+	1
Novelgene1105	scaffold35699	703424	705699	+	1
Novelgene1106	scaffold35699	793110	797939	+	1
Novelgene1107	scaffold35699	833489	836783	+	1
Novelgene1108	scaffold609421	313389	317348	+	1
Novelgene1109	scaffold799363	53055	55856	+	2
Novelgene1110	scaffold240879	56861	57779	+	1
Novelgene1111	scaffold184741	14967	18651	+	1
Novelgene1112	scaffold923175	125134	126219	+	1
Novelgene1113	scaffold19081	117059	121419	+	2
Novelgene1114	scaffold589875	67648	71642	+	2
Novelgene1115	scaffold965151	75126	78477	+	1
Novelgene1116	scaffold965151	301246	303901	+	1
Novelgene1117	scaffold222167	33777	36355	+	1
Novelgene1118	scaffold7899	267659	271380	+	1
Novelgene1119	scaffold189831	575883	578819	+	1
Novelgene1120	scaffold138315	315138	319508	+	1
Novelgene1121	scaffold881909	174809	179395	+	1
Novelgene1122	scaffold616345	1369	6136	+	1
Novelgene1123	scaffold98761	832688	834712	+	1
Novelgene1124	scaffold98761	1219749	1222028	+	1
Novelgene1125	scaffold383893	7898	12682	+	1
Novelgene1126	scaffold973269	401764	404651	+	1
Novelgene1127	scaffold114139	1189244	1191658	+	1
Novelgene1128	scaffold799569	290116	292370	+	1
Novelgene1129	scaffold993715	2168	7015	+	2
Novelgene1130	scaffold993715	114348	115974	+	1
Novelgene1131	scaffold64667	839626	842177	+	1
Novelgene1132	scaffold119431	25386	29534	+	2
Novelgene1133	scaffold119433	833	4270	+	2
Novelgene1134	scaffold170171	144328	147234	+	1
Novelgene1135	scaffold233773	230840	232735	+	1
Novelgene1136	scaffold218867	113179	116151	+	1
Novelgene1137	scaffold1041981	584666	589677	+	2
Novelgene1138	scaffold657711	44916	48519	+	1
Novelgene1139	scaffold70897	633549	636008	+	1
Novelgene1140	scaffold430793	9636	13101	+	4
Novelgene1141	scaffold24589	46880	54818	+	2
Novelgene1142	scaffold857305	10248	13265	+	1
Novelgene1143	scaffold21995	140635	154725	+	1
Novelgene1144	scaffold489757	21295	25637	+	2
Novelgene1145	scaffold489757	239864	243697	+	1
Novelgene1146	scaffold766795	99270	101423	+	1
Novelgene1147	scaffold7299	12452	17056	+	2
Novelgene1148	scaffold13909798	2356	5401	+	1
Novelgene1149	scaffold375965	61419	62549	+	1
Novelgene1150	scaffold363895	497966	499395	+	1
Novelgene1151	scaffold597709	858809	860739	+	1
Novelgene1152	scaffold252817	59960	64372	+	1
Novelgene1153	scaffold252817	307643	311342	+	1
Novelgene1154	scaffold876051	1249075	1252716	+	1
Novelgene1155	scaffold27131	405875	407861	+	1
Novelgene1156	scaffold27131	574662	575149	+	1
Novelgene1157	scaffold953283	138465	138713	+	1
Novelgene1158	scaffold493537	326507	329627	+	1
Novelgene1159	scaffold137343	162688	165083	+	1
Novelgene1160	scaffold137343	175801	176717	+	1
Novelgene1161	scaffold137343	332981	334641	+	1
Novelgene1162	scaffold137343	364880	369096	+	1
Novelgene1163	scaffold137343	512193	517523	+	2
Novelgene1164	scaffold253003	9568	10954	+	3
Novelgene1165	scaffold13912170	2263	6619	+	1
Novelgene1166	scaffold588227	66770	68906	+	1
Novelgene1167	scaffold726289	327342	327901	+	1
Novelgene1168	scaffold726289	374174	379021	+	1
Novelgene1169	scaffold726289	555411	557487	+	1
Novelgene1170	scaffold977575	1	3127	+	1
Novelgene1171	scaffold970257	6827	8161	+	1
Novelgene1172	scaffold756527	232095	236353	+	1
Novelgene1173	scaffold756527	251048	255235	+	1
Novelgene1174	scaffold756527	841889	844483	+	1
Novelgene1175	scaffold739859	9292	16374	+	1
Novelgene1176	scaffold9999991	385113	387841	+	1
Novelgene1177	scaffold9999991	388986	426313	+	1
Novelgene1178	scaffold453267	269618	274176	+	1
Novelgene1179	scaffold453267	323251	333373	+	2
Novelgene1180	scaffold453267	351754	355634	+	1
Novelgene1181	scaffold453267	1403826	1405323	+	1
Novelgene1182	scaffold1042503	118628	120025	+	1
Novelgene1183	scaffold894581	652032	655113	+	2
Novelgene1184	scaffold894581	748277	750843	+	1
Novelgene1185	scaffold894581	946444	952577	+	1
Novelgene1186	scaffold312727	119743	121323	+	1
Novelgene1187	scaffold958977	1119595	1123567	+	1
Novelgene1188	scaffold958977	1151840	1153026	+	1
Novelgene1189	scaffold979713	149807	155345	+	1
Novelgene1190	scaffold693233	80050	81995	+	1
Novelgene1191	scaffold285415	501030	504025	+	1
Novelgene1192	scaffold830959	322697	325430	+	1
Novelgene1193	scaffold540273	524180	528159	+	1
Novelgene1194	scaffold540273	731383	735522	+	1
Novelgene1195	scaffold360161	5265	7750	+	1
Novelgene1196	scaffold473247	13931	15850	+	1
Novelgene1197	scaffold821471	601921	605144	+	1
Novelgene1198	scaffold821471	613348	618374	+	1
Novelgene1199	scaffold821471	2391632	2397129	+	1
Novelgene1200	scaffold167267	711096	715491	+	1
Novelgene1201	scaffold970673	2699	4813	+	2
Novelgene1202	scaffold57599	23348	26208	+	1
Novelgene1203	scaffold57599	138549	143827	+	1
Novelgene1204	scaffold245817	21289	24441	+	1
Novelgene1205	scaffold245817	91092	93444	+	1
Novelgene1206	scaffold90563	64673	66703	+	1
Novelgene1207	scaffold181483	193702	197256	+	1
Novelgene1208	scaffold181483	695601	700697	+	1
Novelgene1209	scaffold181483	1206623	1210444	+	1
Novelgene1210	scaffold24569	38245	41226	+	1
Novelgene1211	scaffold21047	422778	439022	+	2
Novelgene1212	scaffold891621	193632	196880	+	1
Novelgene1213	scaffold891621	197451	205681	+	1
Novelgene1214	scaffold778079	123438	127530	+	2
Novelgene1215	scaffold350199	202431	202926	+	1
Novelgene1216	scaffold37287	772361	778710	+	1
Novelgene1217	scaffold257699	587535	589665	+	1
Novelgene1218	scaffold190927	372572	378297	+	2
Novelgene1219	scaffold958809	585193	602466	+	1
Novelgene1220	scaffold96217	301546	311177	+	3
Novelgene1221	scaffold937249	745227	747161	+	1
Novelgene1222	scaffold543537	78107	81777	+	1
Novelgene1223	scaffold264493	300103	302449	+	1
Novelgene1224	scaffold264493	304860	306828	+	1
Novelgene1225	scaffold264493	380380	383905	+	1
Novelgene1226	scaffold264493	388771	424829	+	3
Novelgene1227	scaffold264493	486975	492125	+	1
Novelgene1228	scaffold264493	952593	958117	+	1
Novelgene1229	scaffold941139	507196	510413	+	1
Novelgene1230	scaffold924993	68399	73025	+	1
Novelgene1231	scaffold924993	76750	79982	+	2
Novelgene1232	scaffold105903	560729	562436	+	1
Novelgene1233	scaffold959495	190008	192537	+	1
Novelgene1234	scaffold959495	213027	215407	+	1
Novelgene1235	scaffold877939	3	2500	+	1
Novelgene1236	scaffold259899	25016	29249	+	2
Novelgene1237	scaffold636345	219528	224837	+	1
Novelgene1238	scaffold686249	74699	79537	+	1
Novelgene1239	scaffold1000527	6394	8934	+	1
Novelgene1240	scaffold1000527	213075	217681	+	1
Novelgene1241	scaffold867625	167781	171568	+	2
Novelgene1242	scaffold177461	584251	588869	+	1
Novelgene1243	scaffold580017	167484	168862	+	1
Novelgene1244	scaffold991243	3154	5785	+	2
Novelgene1245	scaffold752075	710252	711182	+	1
Novelgene1246	scaffold883505	57595	63413	+	1
Novelgene1247	scaffold353315	11086	13998	+	1
Novelgene1248	scaffold903597	416347	419162	+	1
Novelgene1249	scaffold38551	149651	152328	+	1
Novelgene1250	scaffold640765	298352	300982	+	1
Novelgene1251	scaffold1017557	5934	11030	+	1
Novelgene1252	scaffold849959	87044	87282	+	1
Novelgene1253	scaffold250727	99898	102723	+	1
Novelgene1254	scaffold546555	185457	186866	+	2
Novelgene1255	scaffold754601	341110	344178	+	1
Novelgene1256	scaffold617339	297565	303477	+	1
Novelgene1257	scaffold644423	806160	809128	+	1
Novelgene1258	scaffold644423	1115974	1134443	+	1
Novelgene1259	scaffold704251	189179	198079	+	1
Novelgene1260	scaffold666013	72923	74729	+	1
Novelgene1261	scaffold298667	32124	35979	+	1
Novelgene1262	scaffold298667	38729	40699	+	1
Novelgene1263	scaffold400311	40105	41494	+	1
Novelgene1264	scaffold1002091	141296	144375	+	1
Novelgene1265	scaffold330997	133850	135602	+	1
Novelgene1266	scaffold330997	151635	153990	+	1
Novelgene1267	scaffold829081	243085	245915	+	1
Novelgene1268	scaffold926733	76489	80624	+	1
Novelgene1269	scaffold162857	310430	312565	+	1
Novelgene1270	scaffold584151	594167	595721	+	1
Novelgene1271	scaffold584151	1891934	1895475	+	1
Novelgene1272	scaffold415443	789924	791698	+	1
Novelgene1273	scaffold690795	171079	173358	+	1
Novelgene1274	scaffold690795	186000	187722	+	1
Novelgene1275	scaffold690795	289429	293078	+	1
Novelgene1276	scaffold690795	294879	300994	+	1
Novelgene1277	scaffold690795	358689	361249	+	1
Novelgene1278	scaffold910729	58686	63834	+	1
Novelgene1279	scaffold910729	179759	181439	+	1
Novelgene1280	scaffold910729	383382	385511	+	1
Novelgene1281	scaffold1034571	6963	9388	+	1
Novelgene1282	scaffold494273	180896	190087	+	1
Novelgene1283	scaffold89725	692529	694903	+	1
Novelgene1284	scaffold200641	604280	609284	+	1
Novelgene1285	scaffold35493	768089	888577	+	1
Novelgene1286	scaffold500235	114861	118677	+	1
Novelgene1287	scaffold266789	237023	237830	+	1
Novelgene1288	scaffold558897	477305	485111	+	4
Novelgene1289	scaffold597383	55856	60666	+	1
Novelgene1290	scaffold597383	655072	664453	+	1
Novelgene1291	scaffold597383	1097173	1098835	+	1
Novelgene1292	scaffold854867	934854	939479	+	1
Novelgene1293	scaffold854867	968817	973674	+	3
Novelgene1294	scaffold854867	1121791	1124218	+	1
Novelgene1295	scaffold381387	57578	58646	+	1
Novelgene1296	scaffold155823	483710	489045	+	9
Novelgene1297	scaffold936191	1473	1730	+	1
Novelgene1298	scaffold96033	447087	450493	+	1
Novelgene1299	scaffold96033	569848	597461	+	2
Novelgene1300	scaffold998883	234305	238212	+	1
Novelgene1301	scaffold840339	76703	78757	+	1
Novelgene1302	scaffold478351	21933	23436	+	1
Novelgene1303	scaffold478351	24681	26114	+	1
Novelgene1304	scaffold963785	156275	158088	+	1
Novelgene1305	scaffold963785	282294	285420	+	1
Novelgene1306	scaffold973125	97706	100875	+	1
Novelgene1307	scaffold932189	10915	12557	+	1
Novelgene1308	scaffold932189	26936	31400	+	1
Novelgene1309	scaffold932189	47851	52830	+	2
Novelgene1310	scaffold932189	97671	98036	+	1
Novelgene1311	scaffold932189	379089	381504	+	1
Novelgene1312	scaffold488865	30818	33608	+	1
Novelgene1313	scaffold568767	222824	227118	+	2
Novelgene1314	scaffold461511	183195	189183	+	1
Novelgene1315	scaffold461511	973062	975950	+	1
Novelgene1316	scaffold461511	1630620	1632703	+	1
Novelgene1317	scaffold461511	1823786	1825822	+	1
Novelgene1318	scaffold537531	13648	16501	+	1
Novelgene1319	scaffold537531	342629	344784	+	2
Novelgene1320	scaffold537531	433690	437817	+	1
Novelgene1321	scaffold287805	142877	145428	+	1
Novelgene1322	scaffold287805	151663	157170	+	2
Novelgene1323	scaffold287805	177614	179112	+	2
Novelgene1324	scaffold952953	221589	223785	+	1
Novelgene1325	scaffold952953	380797	382108	+	1
Novelgene1326	scaffold317349	104141	107141	+	1
Novelgene1327	scaffold317349	125387	131143	+	1
Novelgene1328	scaffold122145	322270	326796	+	1
Novelgene1329	scaffold122145	595625	598129	+	1
Novelgene1330	scaffold122145	1162980	1164528	+	1
Novelgene1331	scaffold122145	1269111	1271780	+	1
Novelgene1332	scaffold122145	1531698	1534693	+	1
Novelgene1333	scaffold122145	1787701	1791069	+	1
Novelgene1334	scaffold1028527	221867	225387	+	1
Novelgene1335	scaffold154771	733272	735138	+	1
Novelgene1336	scaffold1012533	159997	166458	+	1
Novelgene1337	scaffold1012533	168070	172190	+	1
Novelgene1338	scaffold1012533	191178	193037	+	1
Novelgene1339	scaffold1012533	197597	201003	+	1
Novelgene1340	scaffold1012533	499992	504965	+	1
Novelgene1341	scaffold986425	34035	36468	+	1
Novelgene1342	scaffold871493	10088	12491	+	1
Novelgene1343	scaffold510719	100275	102411	+	1
Novelgene1344	scaffold819869	75893	79188	+	1
Novelgene1345	scaffold581057	102172	106241	+	1
Novelgene1346	scaffold86873	360219	362162	+	1
Novelgene1347	scaffold665285	61834	63860	+	1
Novelgene1348	scaffold665285	190957	191890	+	1
Novelgene1349	scaffold665285	199144	203973	+	1
Novelgene1350	scaffold738073	280383	283892	+	1
Novelgene1351	scaffold738073	294102	297614	+	1
Novelgene1352	scaffold738073	660916	663094	+	1
Novelgene1353	scaffold738073	700647	724576	+	1
Novelgene1354	scaffold738073	727771	732696	+	1
Novelgene1355	scaffold738073	1355318	1357202	+	1
Novelgene1356	scaffold227381	177186	181296	+	1
Novelgene1357	scaffold227381	213744	217583	+	1
Novelgene1358	scaffold227381	241096	246071	+	1
Novelgene1359	scaffold13909126	1021	5035	+	1
Novelgene1360	scaffold254591	477841	481160	+	1
Novelgene1361	scaffold61251	169810	174398	+	1
Novelgene1362	scaffold378927	482615	486086	+	2
Novelgene1363	scaffold378927	1136134	1138430	+	1
Novelgene1364	scaffold763173	180338	188316	+	3
Novelgene1365	scaffold933827	16790	19781	+	1
Novelgene1366	scaffold927739	119970	123041	+	1
Novelgene1367	scaffold927739	152546	157420	+	1
Novelgene1368	scaffold1025491	565621	566805	+	1
Novelgene1369	scaffold1025491	991481	995492	+	1
Novelgene1370	scaffold1025491	1031212	1034202	+	1
Novelgene1371	scaffold471345	1279623	1283834	+	2
Novelgene1372	scaffold713099	204493	207563	+	1
Novelgene1373	scaffold1040023	12748	15621	+	1
Novelgene1374	scaffold1040023	31109	35759	+	1
Novelgene1375	scaffold1040023	53129	58181	+	1
Novelgene1376	scaffold389811	231574	234769	+	1
Novelgene1377	scaffold92511	258318	262324	+	1
Novelgene1378	scaffold816469	214176	216856	+	1
Novelgene1379	scaffold1025259	54660	58602	+	1
Novelgene1380	scaffold101355	269214	272305	+	1
Novelgene1381	scaffold110159	327739	331718	+	1
Novelgene1382	scaffold110159	962834	966494	+	1
Novelgene1383	scaffold924357	113561	115139	+	1
Novelgene1384	scaffold49817	9219	10061	+	1
Novelgene1385	scaffold142615	1651508	1655913	+	1
Novelgene1386	scaffold485451	139870	143400	+	1
Novelgene1387	scaffold903115	119845	123618	+	1
Novelgene1388	scaffold629879	248777	314304	+	3
Novelgene1389	scaffold376003	359455	361755	+	2
Novelgene1390	scaffold13889550	1	1971	+	1
Novelgene1391	scaffold206957	232095	239637	+	3
Novelgene1392	scaffold206957	590675	593480	+	1
Novelgene1393	scaffold678221	1884339	1891249	+	2
Novelgene1394	scaffold678221	2095326	2105681	+	3
Novelgene1395	scaffold93481	76735	78908	+	1
Novelgene1396	scaffold93481	97171	101967	+	1
Novelgene1397	scaffold109587	164206	166613	+	1
Novelgene1398	scaffold950953	767940	769921	+	1
Novelgene1399	scaffold1041249	1	5410	+	1
Novelgene1400	scaffold560831	808163	809224	+	1
Novelgene1401	scaffold756351	956	4244	+	2
Novelgene1402	scaffold757737	180992	183912	+	1
Novelgene1403	scaffold605485	132043	136004	+	1
Novelgene1404	scaffold946201	443206	446140	+	1
Novelgene1405	scaffold315925	194913	197881	+	1
Novelgene1406	scaffold315925	212714	217541	+	1
Novelgene1407	scaffold315925	218262	222751	+	1
Novelgene1408	scaffold315925	920382	935968	+	4
Novelgene1409	scaffold315925	1879416	1882669	+	1
Novelgene1410	scaffold37257	589273	593426	+	1
Novelgene1411	scaffold806103	26755	59877	+	2
Novelgene1412	scaffold914611	124713	134436	+	3
Novelgene1413	scaffold914611	142603	148869	+	1
Novelgene1414	scaffold914611	150796	154720	+	1
Novelgene1415	scaffold914611	320430	321647	+	1
Novelgene1416	scaffold116639	771924	775613	+	3
Novelgene1417	scaffold116639	1267272	1271097	+	1
Novelgene1418	scaffold78355	656684	658116	+	1
Novelgene1419	scaffold78355	660096	662121	+	1
Novelgene1420	scaffold480009	160059	163290	+	1
Novelgene1421	scaffold480009	163885	166860	+	1
Novelgene1422	scaffold323471	14049	43669	+	1
Novelgene1423	scaffold584289	978838	980829	+	1
Novelgene1424	scaffold485859	3934	9910	+	1
Novelgene1425	scaffold810107	219632	222855	+	1
Novelgene1426	scaffold295679	90475	92808	+	1
Novelgene1427	scaffold113885	201837	204802	+	1
Novelgene1428	scaffold472273	160574	164065	+	1
Novelgene1429	scaffold982671	24159	30410	+	3
Novelgene1430	scaffold131573	370717	373043	+	1
Novelgene1431	scaffold131573	384677	387888	+	1
Novelgene1432	scaffold131573	410739	413361	+	1
Novelgene1433	scaffold131573	424436	431401	+	4
Novelgene1434	scaffold90177	82842	84582	+	1
Novelgene1435	scaffold921819	27021	43646	+	2
Novelgene1436	scaffold907003	71289	72328	+	1
Novelgene1437	scaffold224411	764358	767599	+	1
Novelgene1438	scaffold275977	118643	139182	+	2
Novelgene1439	scaffold170799	297358	299658	+	1
Novelgene1440	scaffold170799	306214	310152	+	1
Novelgene1441	scaffold170799	458632	462084	+	1
Novelgene1442	scaffold26433	133531	135961	+	1
Novelgene1443	scaffold26433	138122	141058	+	1
Novelgene1444	scaffold782061	9430	11163	+	1
Novelgene1445	scaffold207955	771181	775150	+	1
Novelgene1446	scaffold16023	169910	171934	+	1
Novelgene1447	scaffold915711	26935	29205	+	1
Novelgene1448	scaffold553811	266045	269724	+	1
Novelgene1449	scaffold225387	6217	10182	+	1
Novelgene1450	scaffold617853	148541	151353	+	1
Novelgene1451	scaffold1026255	43516	45857	+	1
Novelgene1452	scaffold825637	966091	968618	+	1
Novelgene1453	scaffold13866584	10	849	+	1
Novelgene1454	scaffold1015429	5733	13527	+	2
Novelgene1455	scaffold768047	23289	27464	+	1
Novelgene1456	scaffold768047	155578	158944	+	1
Novelgene1457	scaffold653605	270077	273148	+	1
Novelgene1458	scaffold580319	15725	20152	+	1
Novelgene1459	scaffold57065	18733	20825	+	1
Novelgene1460	scaffold711979	13794	15749	+	1
Novelgene1461	scaffold866227	5879	7033	+	1
Novelgene1462	scaffold615439	138636	142040	+	2
Novelgene1463	scaffold615439	186540	189551	+	1
Novelgene1464	scaffold615439	199921	207192	+	2
Novelgene1465	scaffold1024781	756640	761011	+	1
Novelgene1466	scaffold587933	18282	21684	+	1
Novelgene1467	scaffold988283	2964	3512	+	1
Novelgene1468	scaffold105753	157467	159491	+	1
Novelgene1469	scaffold229317	33179	35947	+	3
Novelgene1470	scaffold508917	1058462	1060350	+	1
Novelgene1471	scaffold508917	1066754	1072907	+	1
Novelgene1472	scaffold508917	1080911	1085320	+	1
Novelgene1473	scaffold393325	221667	224520	+	4
Novelgene1474	scaffold393325	316304	318424	+	1
Novelgene1475	scaffold538851	4554	5249	+	1
Novelgene1476	scaffold241219	145004	148953	+	1
Novelgene1477	scaffold703347	1	1678	+	1
Novelgene1478	scaffold71629	234021	324186	+	1
Novelgene1479	scaffold159101	65500	69042	+	1
Novelgene1480	scaffold159101	88445	90875	+	1
Novelgene1481	scaffold159101	824287	826782	+	1
Novelgene1482	scaffold958203	181671	186187	+	1
Novelgene1483	scaffold958203	190913	194293	+	1
Novelgene1484	scaffold980121	144389	145676	+	1
Novelgene1485	scaffold1018575	440688	442885	+	1
Novelgene1486	scaffold888225	58452	62197	+	1
Novelgene1487	scaffold778719	27322	36628	+	3
Novelgene1488	scaffold946799	108058	113014	+	1
Novelgene1489	scaffold875947	378862	384529	+	1
Novelgene1490	scaffold875947	404571	407600	+	1
Novelgene1491	scaffold626655	25387	30139	+	1
Novelgene1492	scaffold284597	144637	148825	+	1
Novelgene1493	scaffold284597	527534	632181	+	2
Novelgene1494	scaffold284597	877805	888799	+	2
Novelgene1495	scaffold284597	904559	909620	+	2
Novelgene1496	scaffold948021	214806	219122	+	1
Novelgene1497	scaffold948021	223767	225292	+	1
Novelgene1498	scaffold817183	772674	775191	+	1
Novelgene1499	scaffold817183	842146	845066	+	2
Novelgene1500	scaffold817183	1575286	1580599	+	1
Novelgene1501	scaffold106135	691	3504	+	1
Novelgene1502	scaffold598289	503	3332	+	1
Novelgene1503	scaffold908817	120107	124624	+	1
Novelgene1504	scaffold525755	102671	108193	+	1
Novelgene1505	scaffold982857	202909	220181	+	7
Novelgene1506	scaffold331967	99637	103334	+	1
Novelgene1507	scaffold331967	972775	974169	+	1
Novelgene1508	scaffold673561	1486	2460	+	1
Novelgene1509	scaffold625267	277786	280044	+	1
Novelgene1510	scaffold388847	14159	15341	+	1
Novelgene1511	scaffold67783	187340	189673	+	1
Novelgene1512	scaffold67783	270649	273182	+	1
Novelgene1513	scaffold403407	179885	183048	+	1
Novelgene1514	scaffold882249	160236	163974	+	1
Novelgene1515	scaffold751193	24437	27480	+	1
Novelgene1516	scaffold751193	31152	36703	+	3
Novelgene1517	scaffold299551	72068	76643	+	1
Novelgene1518	scaffold892201	205738	207706	+	2
Novelgene1519	scaffold42071	425995	427414	+	1
Novelgene1520	scaffold14661	43650	49040	+	1
Novelgene1521	scaffold823105	17173	19575	+	1
Novelgene1522	scaffold761035	526629	529104	+	1
Novelgene1523	scaffold761035	805332	809270	+	2
Novelgene1524	scaffold761035	927963	929736	+	1
Novelgene1525	scaffold895551	31763	34488	+	1
Novelgene1526	scaffold173777	374133	379257	+	1
Novelgene1527	scaffold423079	208309	212405	+	1
Novelgene1528	scaffold1013721	68758	70561	+	1
Novelgene1529	scaffold201255	123290	126180	+	1
Novelgene1530	scaffold530479	32648	35076	+	1
Novelgene1531	scaffold829341	17112	21297	+	1
Novelgene1532	scaffold781301	71811	75393	+	1
Novelgene1533	scaffold1042585	347928	351829	+	1
Novelgene1534	scaffold719755	40796	43815	+	2
Novelgene1535	scaffold150471	507527	510309	+	1
Novelgene1536	scaffold142969	28818	31557	+	1
Novelgene1537	scaffold142969	1022221	1024205	+	1
Novelgene1538	scaffold974603	34945	42166	+	1
Novelgene1539	scaffold162935	91800	97383	+	1
Novelgene1540	scaffold79609	420969	423456	+	1
Novelgene1541	scaffold563931	110199	112928	+	1
Novelgene1542	scaffold563931	175642	182014	+	1
Novelgene1543	scaffold241077	524087	527250	+	1
Novelgene1544	scaffold701611	394297	397598	+	1
Novelgene1545	scaffold701611	891663	895645	+	1
Novelgene1546	scaffold701611	1076331	1081143	+	1
Novelgene1547	scaffold104561	79180	81488	+	1
Novelgene1548	scaffold104561	81806	84807	+	1
Novelgene1549	scaffold104561	87993	91146	+	1
Novelgene1550	scaffold104561	93873	96791	+	1
Novelgene1551	scaffold104561	117199	120318	+	1
Novelgene1552	scaffold104561	405814	411128	+	1
Novelgene1553	scaffold527651	389506	395167	+	1
Novelgene1554	scaffold44503	405339	407633	+	1
Novelgene1555	scaffold651073	377556	382015	+	3
Novelgene1556	scaffold568407	6402	11181	+	1
Novelgene1557	scaffold931505	96546	101290	+	1
Novelgene1558	scaffold965225	565298	567835	+	1
Novelgene1559	scaffold1020783	100169	102845	+	1
Novelgene1560	scaffold861503	397053	399080	+	1
Novelgene1561	scaffold861503	453519	454927	+	1
Novelgene1562	scaffold861503	750179	751928	+	1
Novelgene1563	scaffold690105	515396	516770	+	1
Novelgene1564	scaffold152975	436189	439563	+	2
Novelgene1565	scaffold152975	874655	878825	+	1
Novelgene1566	scaffold839827	812104	814026	+	1
Novelgene1567	scaffold839827	1476650	1477516	+	1
Novelgene1568	scaffold286199	1622217	1625210	+	1
Novelgene1569	scaffold910837	523357	529276	+	2
Novelgene1570	scaffold910837	532331	537132	+	1
Novelgene1571	scaffold859689	66606	69917	+	1
Novelgene1572	scaffold101221	229000	236210	+	1
Novelgene1573	scaffold103297	1047424	1051310	+	1
Novelgene1574	scaffold531675	120917	122261	+	1
Novelgene1575	scaffold980913	30627	34211	+	1
Novelgene1576	scaffold41403	23842	47261	+	2
Novelgene1577	scaffold270869	9154	13396	+	1
Novelgene1578	scaffold270869	47604	70640	+	1
Novelgene1579	scaffold56991	160129	163451	+	1
Novelgene1580	scaffold56991	414173	415121	+	1
Novelgene1581	scaffold56991	1815233	1820474	+	1
Novelgene1582	scaffold56991	2163881	2169828	+	2
Novelgene1583	scaffold612295	1057307	1059396	+	1
Novelgene1584	scaffold612295	1143264	1146419	+	1
Novelgene1585	scaffold612295	1554463	1556979	+	1
Novelgene1586	scaffold612295	1565533	1570050	+	1
Novelgene1587	scaffold669913	155276	158978	+	1
Novelgene1588	scaffold316171	212186	213280	+	1
Novelgene1589	scaffold254749	108140	112744	+	1
Novelgene1590	scaffold254749	940450	943541	+	1
Novelgene1591	scaffold254749	1042795	1044866	+	1
Novelgene1592	scaffold904857	402011	404018	+	1
Novelgene1593	scaffold270867	313985	319800	+	1
Novelgene1594	scaffold1009589	1517329	1522565	+	1
Novelgene1595	scaffold1009589	1526937	1529255	+	1
Novelgene1596	scaffold533251	305980	309470	+	1
Novelgene1597	scaffold533251	316992	321219	+	2
Novelgene1598	scaffold48181	27474	31289	+	1
Novelgene1599	scaffold1016289	814340	818914	+	1
Novelgene1600	scaffold534937	2226685	2233906	+	1
Novelgene1601	scaffold871019	129787	130801	+	1
Novelgene1602	scaffold871019	134003	142435	+	1
Novelgene1603	scaffold871019	274669	278221	+	1
Novelgene1604	scaffold871019	341124	344257	+	1
Novelgene1605	scaffold565093	372233	377686	+	1
Novelgene1606	scaffold339815	79674	80516	+	1
Novelgene1607	scaffold939231	414835	420027	+	2
Novelgene1608	scaffold844871	339547	342120	+	1
Novelgene1609	scaffold796909	5355	10919	+	1
Novelgene1610	scaffold77839	224086	226750	+	1
Novelgene1611	scaffold633747	849775	853440	+	1
Novelgene1612	scaffold231461	179087	183955	+	2
Novelgene1613	scaffold401307	345955	350502	+	1
Novelgene1614	scaffold401307	1092774	1096892	+	1
Novelgene1615	scaffold401307	1109686	1117776	+	2
Novelgene1616	scaffold401307	1137734	1139512	+	1
Novelgene1617	scaffold401307	1766249	1770798	+	2
Novelgene1618	scaffold146041	1239527	1244121	+	1
Novelgene1619	scaffold536261	39832	42726	+	1
Novelgene1620	scaffold536261	89876	93320	+	1
Novelgene1621	scaffold550691	1	9877	+	1
Novelgene1622	scaffold927893	13019	17250	+	1
Novelgene1623	scaffold927893	152278	153809	+	1
Novelgene1624	scaffold81733	218413	220802	+	1
Novelgene1625	scaffold81733	447493	450665	+	1
Novelgene1626	scaffold81733	479852	482665	+	1
Novelgene1627	scaffold784403	6489	7970	+	1
Novelgene1628	scaffold1002963	53298	54997	+	1
Novelgene1629	scaffold652255	630786	684604	+	7
Novelgene1630	scaffold652255	838045	841778	+	1
Novelgene1631	scaffold652255	1491603	1496856	+	2
Novelgene1632	scaffold262785	95290	97818	+	1
Novelgene1633	scaffold207095	27730	30330	+	1
Novelgene1634	scaffold218531	455688	458989	+	1
Novelgene1635	scaffold141555	38025	39518	+	1
Novelgene1636	scaffold488455	32118	33684	+	1
Novelgene1637	scaffold26091	633945	634267	+	1
Novelgene1638	scaffold985899	96869	97036	+	1
Novelgene1639	scaffold1020565	8022	9485	+	1
Novelgene1640	scaffold255233	203165	207586	+	1
Novelgene1641	scaffold799745	251414	255992	+	1
Novelgene1642	scaffold730307	14809	17721	+	1
Novelgene1643	scaffold1019729	17249	21179	+	1
Novelgene1644	scaffold1019729	41813	44193	+	1
Novelgene1645	scaffold1019729	493611	497706	+	1
Novelgene1646	scaffold1019729	578005	579344	+	1
Novelgene1647	scaffold933661	254927	257962	+	1
Novelgene1648	scaffold18517	46059	49445	+	1
Novelgene1649	scaffold593089	367067	368297	+	2
Novelgene1650	scaffold990985	1027409	1031976	+	2
Novelgene1651	scaffold1011089	546525	550341	+	1
Novelgene1652	scaffold683165	166923	169167	+	1
Novelgene1653	scaffold70187	163044	167741	+	1
Novelgene1654	scaffold342457	964	2885	+	1
Novelgene1655	scaffold292171	171922	176506	+	1
Novelgene1656	scaffold381831	126139	129218	+	1
Novelgene1657	scaffold157897	157891	160243	+	1
Novelgene1658	scaffold1002589	478907	483323	+	1
Novelgene1659	scaffold924705	75558	76622	+	1
Novelgene1660	scaffold738335	241628	251676	+	3
Novelgene1661	scaffold738335	480971	483993	+	1
Novelgene1662	scaffold738335	602846	605071	+	1
Novelgene1663	scaffold663555	53694	55831	+	1
Novelgene1664	scaffold964895	224370	228342	+	1
Novelgene1665	scaffold474381	213472	217406	+	1
Novelgene1666	scaffold88173	275350	277752	+	1
Novelgene1667	scaffold88173	404243	409736	+	1
Novelgene1668	scaffold119857	55446	58994	+	1
Novelgene1669	scaffold504541	511059	513057	+	1
Novelgene1670	scaffold48449	340965	344496	+	2
Novelgene1671	scaffold48449	807718	810309	+	1
Novelgene1672	scaffold986707	181967	186372	+	1
Novelgene1673	scaffold986707	348391	356787	+	1
Novelgene1674	scaffold533031	297152	301683	+	3
Novelgene1675	scaffold533031	317343	322376	+	1
Novelgene1676	scaffold533031	333073	334928	+	1
Novelgene1677	scaffold925385	8460	11689	+	1
Novelgene1678	scaffold1026335	170629	174817	+	1
Novelgene1679	scaffold384481	348048	352571	+	2
Novelgene1680	scaffold384481	833000	834425	+	1
Novelgene1681	scaffold979943	98165	102608	+	1
Novelgene1682	scaffold979943	137122	140660	+	1
Novelgene1683	scaffold744961	419882	422801	+	1
Novelgene1684	scaffold692291	12420	14280	+	1
Novelgene1685	scaffold692291	794375	797455	+	1
Novelgene1686	scaffold417003	426989	429914	+	1
Novelgene1687	scaffold609029	6246	8155	+	1
Novelgene1688	scaffold1023131	645761	648355	+	1
Novelgene1689	scaffold387111	357468	360998	+	1
Novelgene1690	scaffold387111	649472	653979	+	1
Novelgene1691	scaffold966367	324435	327179	+	1
Novelgene1692	scaffold985441	39588	45224	+	3
Novelgene1693	scaffold75601	642	5472	+	1
Novelgene1694	scaffold978603	93030	95496	+	1
Novelgene1695	scaffold811647	850844	855852	+	1
Novelgene1696	scaffold535969	197553	198699	+	1
Novelgene1697	scaffold627047	77148	80098	+	1
Novelgene1698	scaffold627047	93947	107904	+	1
Novelgene1699	scaffold437963	12076	16110	+	2
Novelgene1700	scaffold953155	173613	175849	+	1
Novelgene1701	scaffold976865	261373	263172	+	1
Novelgene1702	scaffold825627	72852	77231	+	2
Novelgene1703	scaffold163771	9566	13838	+	1
Novelgene1704	scaffold643545	38392	44508	+	1
Novelgene1705	scaffold218633	227651	230279	+	1
Novelgene1706	scaffold247985	225586	228286	+	1
Novelgene1707	scaffold247985	314625	316447	+	1
Novelgene1708	scaffold247985	644474	646885	+	1
Novelgene1709	scaffold247985	652529	655899	+	1
Novelgene1710	scaffold247985	876042	881383	+	2
Novelgene1711	scaffold247985	1827521	1829348	+	1
Novelgene1712	scaffold247985	2221897	2223665	+	1
Novelgene1713	scaffold579931	193039	197127	+	1
Novelgene1714	scaffold1012991	231053	233758	+	1
Novelgene1715	scaffold827483	41721	44722	+	2
Novelgene1716	scaffold935997	151790	153446	+	1
Novelgene1717	scaffold935997	153953	158063	+	1
Novelgene1718	scaffold935997	167751	168783	+	1
Novelgene1719	scaffold984855	469363	472402	+	1
Novelgene1720	scaffold984855	474670	478320	+	1
Novelgene1721	scaffold13909848	844	3565	+	1
Novelgene1722	scaffold849395	49253	51925	+	1
Novelgene1723	scaffold64125	490287	493878	+	2
Novelgene1724	scaffold1027757	2070	2913	+	1
Novelgene1725	scaffold871805	142250	148510	+	1
Novelgene1726	scaffold840143	153474	156648	+	1
Novelgene1727	scaffold944309	67859	71067	+	1
Novelgene1728	scaffold50457	16423	21106	+	6
Novelgene1729	scaffold590291	122630	124175	+	1
Novelgene1730	scaffold590291	667707	669000	+	1
Novelgene1731	scaffold780663	25321	28806	+	2
Novelgene1732	scaffold981407	24209	26904	+	1
Novelgene1733	scaffold414023	1360	4402	+	1
Novelgene1734	scaffold1000051	2593	6350	+	1
Novelgene1735	scaffold1000051	7790	11990	+	1
Novelgene1736	scaffold1000051	504987	507546	+	1
Novelgene1737	scaffold608683	11581	14748	+	1
Novelgene1738	scaffold562525	159889	162585	+	1
Novelgene1739	scaffold920711	380438	383679	+	1
Novelgene1740	scaffold461689	1608	4976	+	2
Novelgene1741	scaffold25179	456738	460116	+	1
Novelgene1742	scaffold698599	777656	783201	+	1
Novelgene1743	scaffold13832558	443	774	+	1
Novelgene1744	scaffold645793	61982	65503	+	1
Novelgene1745	scaffold794991	40424	41499	+	1
Novelgene1746	scaffold1032591	48733	50796	+	1
Novelgene1747	scaffold1032591	1463089	1468061	+	1
Novelgene1748	scaffold850087	45790	51300	+	5
Novelgene1749	scaffold850087	584646	590620	+	1
Novelgene1750	scaffold190345	36628	40052	+	1
Novelgene1751	scaffold937355	29665	40492	+	1
Novelgene1752	scaffold134049	93794	97677	+	1
Novelgene1753	scaffold134049	279079	282102	+	1
Novelgene1754	scaffold134049	325676	330344	+	1
Novelgene1755	scaffold1039289	131500	132082	+	1
Novelgene1756	scaffold688513	123615	128671	+	1
Novelgene1757	scaffold688513	871091	872088	+	1
Novelgene1758	scaffold133039	320451	323997	+	1
Novelgene1759	scaffold30161	205865	210598	+	1
Novelgene1760	scaffold30161	280055	282728	+	1
Novelgene1761	scaffold30161	377989	381456	+	1
Novelgene1762	scaffold838749	284954	287754	+	1
Novelgene1763	scaffold117101	564602	567541	+	2
Novelgene1764	scaffold400567	22	7938	+	3
Novelgene1765	scaffold448419	488719	492024	+	1
Novelgene1766	scaffold588117	9081	11708	+	2
Novelgene1767	scaffold1032271	438502	442524	+	1
Novelgene1768	scaffold1032271	718422	720244	+	1
Novelgene1769	scaffold1032271	799106	799865	+	1
Novelgene1770	scaffold1018101	91210	93113	+	1
Novelgene1771	scaffold1018101	95877	102805	+	5
Novelgene1772	scaffold1018101	103375	108290	+	1
Novelgene1773	scaffold234759	380478	385908	+	1
Novelgene1774	scaffold234759	388642	391034	+	1
Novelgene1775	scaffold234759	799919	802380	+	1
Novelgene1776	scaffold865765	28958	31428	+	2
Novelgene1777	scaffold998553	946298	960085	+	6
Novelgene1778	scaffold998553	1027303	1032825	+	4
Novelgene1779	scaffold165011	2927	5072	+	2
Novelgene1780	scaffold780889	55045	60588	+	1
Novelgene1781	scaffold444761	200263	201325	+	1
Novelgene1782	scaffold894969	88685	93360	+	1
Novelgene1783	scaffold799009	134882	136395	+	1
Novelgene1784	scaffold799009	232153	236477	+	1
Novelgene1785	scaffold799009	243765	246362	+	1
Novelgene1786	scaffold397783	155932	160504	+	1
Novelgene1787	scaffold918611	364048	367995	+	1
Novelgene1788	scaffold619529	427617	429818	+	1
Novelgene1789	scaffold686847	149531	151455	+	1
Novelgene1790	scaffold686847	415682	418564	+	1
Novelgene1791	scaffold492411	453761	454723	+	1
Novelgene1792	scaffold13873442	1	1633	+	1
Novelgene1793	scaffold220773	46930	49023	+	1
Novelgene1794	scaffold693813	94205	95853	+	1
Novelgene1795	scaffold378019	334237	339607	+	2
Novelgene1796	scaffold918299	372805	376848	+	1
Novelgene1797	scaffold387585	156872	158836	+	1
Novelgene1798	scaffold230507	192994	197610	+	1
Novelgene1799	scaffold554901	1403665	1405888	+	1
Novelgene1800	scaffold554901	2455261	2458185	+	1
Novelgene1801	scaffold126117	13472	16147	+	1
Novelgene1802	scaffold321267	43522	47028	+	1
Novelgene1803	scaffold321267	211060	215045	+	1
Novelgene1804	scaffold898435	325378	327583	+	1
Novelgene1805	scaffold5555	120130	121724	+	1
Novelgene1806	scaffold823801	470195	475374	+	1
Novelgene1807	scaffold893123	145016	149469	+	1
Novelgene1808	scaffold968151	172957	177918	+	1
Novelgene1809	scaffold235975	283307	286023	+	1
Novelgene1810	scaffold468567	809058	812994	+	1
Novelgene1811	scaffold728889	333498	337615	+	1
Novelgene1812	scaffold773353	542433	548088	+	1
Novelgene1813	scaffold773353	692650	697815	+	1
Novelgene1814	scaffold174697	185124	187187	+	2
Novelgene1815	scaffold174697	409021	410668	+	1
Novelgene1816	scaffold543881	487667	497639	+	1
Novelgene1817	scaffold543881	507510	512013	+	1
Novelgene1818	scaffold543881	517509	525247	+	2
Novelgene1819	scaffold543881	1196598	1198108	+	1
Novelgene1820	scaffold720571	18409	21170	+	1
Novelgene1821	scaffold623945	270775	272728	+	1
Novelgene1822	scaffold974901	121748	126662	+	1
Novelgene1823	scaffold974901	160280	163254	+	1
Novelgene1824	scaffold974901	349133	354352	+	1
Novelgene1825	scaffold974901	567479	569066	+	1
Novelgene1826	scaffold974901	667745	668353	+	1
Novelgene1827	scaffold974901	838496	841625	+	1
Novelgene1828	scaffold974901	1021958	1024242	+	1
Novelgene1829	scaffold209689	4632	8310	+	1
Novelgene1830	scaffold209689	110603	116273	+	2
Novelgene1831	scaffold209689	119350	124165	+	1
Novelgene1832	scaffold209689	128993	131007	+	1
Novelgene1833	scaffold900725	457248	461311	+	1
Novelgene1834	scaffold48511	281859	284385	+	2
Novelgene1835	scaffold680501	1214	5216	+	1
Novelgene1836	scaffold172305	10970	13608	+	1
Novelgene1837	scaffold172305	19004	22841	+	1
Novelgene1838	scaffold172305	27039	30275	+	1
Novelgene1839	scaffold172305	363456	368643	+	1
Novelgene1840	scaffold684029	16138	19860	+	2
Novelgene1841	scaffold48517	72011	73904	+	1
Novelgene1842	scaffold447019	1120528	1123353	+	1
Novelgene1843	scaffold447019	1125711	1131300	+	1
Novelgene1844	scaffold152801	264977	269403	+	1
Novelgene1845	scaffold899489	1172442	1175924	+	1
Novelgene1846	scaffold899489	1179214	1183382	+	1
Novelgene1847	scaffold899489	1191683	1197155	+	1
Novelgene1848	scaffold714435	117252	120345	+	2
Novelgene1849	scaffold157837	676520	681777	+	1
Novelgene1850	scaffold157837	894613	914779	+	1
Novelgene1851	scaffold157837	915266	917668	+	1
Novelgene1852	scaffold157837	922823	928305	+	1
Novelgene1853	scaffold680989	765681	769710	+	1
Novelgene1854	scaffold870787	8837	161228	+	1
Novelgene1855	scaffold842525	90198	90933	+	1
Novelgene1856	scaffold792459	1107930	1111377	+	1
Novelgene1857	scaffold49607	666198	670489	+	2
Novelgene1858	scaffold49607	800682	803930	+	1
Novelgene1859	scaffold176325	409840	414340	+	1
Novelgene1860	scaffold333	83995	88846	+	1
Novelgene1861	scaffold333	102403	105763	+	1
Novelgene1862	scaffold333	113615	117345	+	1
Novelgene1863	scaffold774949	372061	376320	+	2
Novelgene1864	scaffold869671	15251	19137	+	1
Novelgene1865	scaffold78989	28163	30146	+	1
Novelgene1866	scaffold78989	196407	210506	+	1
Novelgene1867	scaffold731401	984035	986511	+	1
Novelgene1868	scaffold1040689	7371	8842	+	1
Novelgene1869	scaffold884943	118194	124921	+	1
Novelgene1870	scaffold884943	142655	145576	+	1
Novelgene1871	scaffold884943	183141	186224	+	1
Novelgene1872	scaffold497601	339812	342060	+	1
Novelgene1873	scaffold662943	105111	108913	+	1
Novelgene1874	scaffold527283	2167	8142	+	1
Novelgene1875	scaffold119995	79543	84984	+	1
Novelgene1876	scaffold497821	13775	16333	+	1
Novelgene1877	scaffold497821	17999	20926	+	1
Novelgene1878	scaffold497821	21441	25899	+	1
Novelgene1879	scaffold800887	33232	34060	+	1
Novelgene1880	scaffold123695	15419	20483	+	2
Novelgene1881	scaffold397097	977	6288	+	1
Novelgene1882	scaffold297795	235853	245242	+	1
Novelgene1883	scaffold130729	11796	14410	+	1
Novelgene1884	scaffold972757	167036	168234	+	1
Novelgene1885	scaffold762555	924138	928938	+	1
Novelgene1886	scaffold129225	147207	336799	+	2
Novelgene1887	scaffold647077	77631	81898	+	1
Novelgene1888	scaffold869707	15174	19477	+	1
Novelgene1889	scaffold624323	70873	73415	+	1
Novelgene1890	scaffold283349	167075	171684	+	1
Novelgene1891	scaffold541587	243264	246865	+	1
Novelgene1892	scaffold541587	374388	378270	+	1
Novelgene1893	scaffold98151	903281	905745	+	1
Novelgene1894	scaffold773139	7576	16897	+	1
Novelgene1895	scaffold183427	22951	25116	+	1
Novelgene1896	scaffold182403	12814	15149	+	1
Novelgene1897	scaffold182403	177011	179575	+	1
Novelgene1898	scaffold182403	326706	332026	+	1
Novelgene1899	scaffold182403	376181	379113	+	1
Novelgene1900	scaffold182403	417899	422612	+	1
Novelgene1901	scaffold182403	544294	547509	+	1
Novelgene1902	scaffold182403	819596	822082	+	1
Novelgene1903	scaffold182403	1055839	1059100	+	1
Novelgene1904	scaffold955727	7124	8647	+	1
Novelgene1905	scaffold405011	102677	120284	+	3
Novelgene1906	scaffold1003229	73065	76219	+	1
Novelgene1907	scaffold1003229	88915	92880	+	1
Novelgene1908	scaffold171799	120988	125603	+	1
Novelgene1909	scaffold265641	37963	39188	+	1
Novelgene1910	scaffold833009	19235	19873	+	1
Novelgene1911	scaffold199425	7437	13145	+	1
Novelgene1912	scaffold199425	51529	53749	+	1
Novelgene1913	scaffold199425	871075	875432	+	1
Novelgene1914	scaffold710879	178762	183611	+	1
Novelgene1915	scaffold710879	208077	215811	+	1
Novelgene1916	scaffold598867	113840	116480	+	1
Novelgene1917	scaffold598867	819873	823713	+	1
Novelgene1918	scaffold169989	79773	84945	+	1
Novelgene1919	scaffold907713	1081042	1084273	+	1
Novelgene1920	scaffold907713	1273698	1276967	+	4
Novelgene1921	scaffold311309	656943	659790	+	1
Novelgene1922	scaffold593189	4656	8223	+	1
Novelgene1923	scaffold717299	1152372	1155276	+	1
Novelgene1924	scaffold857049	250900	252506	+	1
Novelgene1925	scaffold861869	59546	62874	+	1
Novelgene1926	scaffold861869	66008	68996	+	1
Novelgene1927	scaffold861869	111137	114569	+	1
Novelgene1928	scaffold405903	231301	233904	+	1
Novelgene1929	scaffold971669	242334	245627	+	1
Novelgene1930	scaffold457203	389087	392102	+	1
Novelgene1931	scaffold876623	28487	33107	+	2
Novelgene1932	scaffold876623	53664	55801	+	1
Novelgene1933	scaffold13912106	274	1517	+	1
Novelgene1934	scaffold521185	86418	91179	+	1
Novelgene1935	scaffold521185	543242	548728	+	1
Novelgene1936	scaffold46621	795677	798790	+	1
Novelgene1937	scaffold1004345	1166566	1172502	+	1
Novelgene1938	scaffold318695	84713	88183	+	1
Novelgene1939	scaffold925533	1329387	1332268	+	1
Novelgene1940	scaffold657473	88139	89791	+	1
Novelgene1941	scaffold125571	437490	439028	+	1
Novelgene1942	scaffold401465	45734	46919	+	1
Novelgene1943	scaffold401465	104598	119190	+	1
Novelgene1944	scaffold401465	294770	299999	+	1
Novelgene1945	scaffold867133	98188	102011	+	1
Novelgene1946	scaffold149975	553057	557952	+	1
Novelgene1947	scaffold247197	43590	46436	+	1
Novelgene1948	scaffold956385	373814	377755	+	3
Novelgene1949	scaffold100479	274	3728	+	1
Novelgene1950	scaffold776941	44549	50966	+	1
Novelgene1951	scaffold1008199	275676	280373	+	1
Novelgene1952	scaffold987533	11700	14881	+	1
Novelgene1953	scaffold146389	562860	564453	+	1
Novelgene1954	scaffold786315	46733	48306	+	1
Novelgene1955	scaffold160231	107419	112260	+	1
Novelgene1956	scaffold970627	96901	101565	+	1
Novelgene1957	scaffold698059	59143	61304	+	1
Novelgene1958	scaffold813835	322488	325752	+	1
Novelgene1959	scaffold13837772	1	482	+	1
Novelgene1960	scaffold995685	530017	534912	+	1
Novelgene1961	scaffold743479	16036	20794	+	1
Novelgene1962	scaffold33709	52447	55008	+	1
Novelgene1963	scaffold33709	107724	112240	+	1
Novelgene1964	scaffold33709	159191	167317	+	2
Novelgene1965	scaffold33709	277749	280860	+	3
Novelgene1966	scaffold33709	547311	550614	+	1
Novelgene1967	scaffold790687	125070	129727	+	4
Novelgene1968	scaffold125481	697064	702227	+	3
Novelgene1969	scaffold355203	1234307	1238442	+	1
Novelgene1970	scaffold946403	403668	409328	+	2
Novelgene1971	scaffold462239	504268	506520	+	1
Novelgene1972	scaffold604175	5226	33346	+	3
Novelgene1973	scaffold682117	95786	99613	+	2
Novelgene1974	scaffold790375	35399	36913	+	1
Novelgene1975	scaffold934039	66569	67776	+	1
Novelgene1976	scaffold934039	84905	89334	+	1
Novelgene1977	scaffold511629	716000	722217	+	1
Novelgene1978	scaffold511629	726441	731540	+	1
Novelgene1979	scaffold853181	76372	79632	+	1
Novelgene1980	scaffold64931	658660	661271	+	1
Novelgene1981	scaffold829747	325944	326825	+	1
Novelgene1982	scaffold1014043	101649	103982	+	1
Novelgene1983	scaffold231643	72490	74566	+	1
Novelgene1984	scaffold139377	9920	14384	+	1
Novelgene1985	scaffold996869	259468	263143	+	1
Novelgene1986	scaffold672343	32157	33362	+	1
Novelgene1987	scaffold761729	699208	705518	+	1
Novelgene1988	scaffold868949	394305	397406	+	1
Novelgene1989	scaffold45611	141686	145642	+	2
Novelgene1990	scaffold667719	767679	771917	+	1
Novelgene1991	scaffold450743	54167	56961	+	1
Novelgene1992	scaffold859105	51409	55723	+	1
Novelgene1993	scaffold845095	250140	254315	+	5
Novelgene1994	scaffold865977	239986	242631	+	1
Novelgene1995	scaffold935225	133815	138189	+	1
Novelgene1996	scaffold529633	237150	239372	+	1
Novelgene1997	scaffold251179	182429	185193	+	1
Novelgene1998	scaffold251179	212409	215019	+	1
Novelgene1999	scaffold251179	218242	222966	+	1
[truncated: 2,009 more rows]
