# Supplementary material for: Single-Molecule Long-Read Sequencing Reveals the Diversity of Full-Length Transcripts in Leaves of Gnetum (Gnetales)
Source: Int J Mol Sci. 2019 Dec 17;20(24):6350. doi: 10.3390/ijms20246350 (PMC6941099; doi:10.3390/ijms20246350)
Supplement: Supplementary file 1 [file ijms-20-06350-s001.zip › File S2. List of the predicted lncRNAs.xls]

## Sheet: Sheet1
transcript_id	gene_id	type	length	exon_number
Novelgene2754_novel01	Novelgene2754	lncRNA	1633	1
TnS000729703g01_novel07	TnS000729703g01	lncRNA	235	1
Novelgene1710_novel01	Novelgene1710	lncRNA	4603	1
TnS000294255g01_novel05	TnS000294255g01	lncRNA	5770	1
TnS000580949g02_novel12	TnS000580949g02	lncRNA	2343	1
Novelgene3379_novel01	Novelgene3379	lncRNA	2606	9
TnS000253501g05_novel01	TnS000253501g05	lncRNA	1898	2
Novelgene0489_novel03	Novelgene0489	lncRNA	1996	1
Novelgene2486_novel03	Novelgene2486	lncRNA	3159	1
Novelgene0095_novel01	Novelgene0095	lncRNA	2649	1
Novelgene1157_novel01	Novelgene1157	lncRNA	249	1
Novelgene2196_novel01	Novelgene2196	lncRNA	3699	2
Novelgene1983_novel01	Novelgene1983	lncRNA	2077	1
TnS000968413g01_novel02	TnS000968413g01	lncRNA	2486	1
Novelgene2232_novel01	Novelgene2232	lncRNA	2486	1
Novelgene3152_novel01	Novelgene3152	lncRNA	863	1
TnS000674141g16_novel02	TnS000674141g16	lncRNA	4257	1
TnS000959203g01_novel03	TnS000959203g01	lncRNA	3074	2
Novelgene3085_novel01	Novelgene3085	lncRNA	2585	1
Novelgene0463_novel01	Novelgene0463	lncRNA	2042	1
Novelgene2540_novel02	Novelgene2540	lncRNA	1417	1
TnS000005945g11_novel01	TnS000005945g11	lncRNA	2424	7
TnS000655603g05_novel03	TnS000655603g05	lncRNA	2165	3
TnS000597069g02_novel02	TnS000597069g02	lncRNA	1888	2
Novelgene3094_novel01	Novelgene3094	lncRNA	2934	2
Novelgene2613_novel01	Novelgene2613	lncRNA	3156	1
Novelgene0109_novel08	Novelgene0109	lncRNA	655	1
Novelgene0447_novel01	Novelgene0447	lncRNA	2953	1
Novelgene2651_novel01	Novelgene2651	lncRNA	2889	1
Novelgene3465_novel01	Novelgene3465	lncRNA	5235	2
Novelgene1704_novel01	Novelgene1704	lncRNA	6117	1
Novelgene0762_novel01	Novelgene0762	lncRNA	3818	2
Novelgene2589_novel01	Novelgene2589	lncRNA	5252	1
TnS000134725g02_novel06	TnS000134725g02	lncRNA	2049	1
TnS000014993g01_novel01	TnS000014993g01	lncRNA	2806	1
TnS000452573g13_novel01	TnS000452573g13	lncRNA	1796	1
TnS000002419g01_novel01	TnS000002419g01	lncRNA	2238	1
Novelgene2481_novel01	Novelgene2481	lncRNA	3821	1
TnS000485669g01_novel02	TnS000485669g01	lncRNA	2584	1
TnS000112417g03_novel04	TnS000112417g03	lncRNA	1488	2
TnS000681293g01_novel05	TnS000681293g01	lncRNA	3155	2
TnS000824675g01_novel02	TnS000824675g01	lncRNA	480	1
Novelgene2058_novel01	Novelgene2058	lncRNA	3557	1
Novelgene3552_novel01	Novelgene3552	lncRNA	1358	4
Novelgene1803_novel01	Novelgene1803	lncRNA	3986	1
TnS000956981g03_novel01	TnS000956981g03	lncRNA	4937	2
Novelgene0339_novel01	Novelgene0339	lncRNA	4198	1
Novelgene3639_novel01	Novelgene3639	lncRNA	2849	3
TnS000355203g10_novel01	TnS000355203g10	lncRNA	3409	2
Novelgene2064_novel01	Novelgene2064	lncRNA	1515	1
Novelgene3386_novel01	Novelgene3386	lncRNA	4200	1
Novelgene2630_novel01	Novelgene2630	lncRNA	2795	1
Novelgene3365_novel01	Novelgene3365	lncRNA	4141	1
Novelgene0781_novel01	Novelgene0781	lncRNA	3706	1
TnS000582695g01_novel06	TnS000582695g01	lncRNA	5510	1
TnS000132307g04_novel01	TnS000132307g04	lncRNA	3627	1
Novelgene1370_novel01	Novelgene1370	lncRNA	2991	1
Novelgene3854_novel01	Novelgene3854	lncRNA	3842	3
TnS000222675g05_novel05	TnS000222675g05	lncRNA	2805	1
TnS000226557g09_novel02	TnS000226557g09	lncRNA	4564	3
TnS000050457g01_novel01	TnS000050457g01	lncRNA	1568	3
Novelgene0648_novel01	Novelgene0648	lncRNA	4360	1
TnS000045303g02_novel01	TnS000045303g02	lncRNA	1382	1
Novelgene1233_novel01	Novelgene1233	lncRNA	2530	1
Novelgene1220_novel03	Novelgene1220	lncRNA	2268	1
Novelgene0262_novel02	Novelgene0262	lncRNA	2571	1
Novelgene0584_novel01	Novelgene0584	lncRNA	3353	1
Novelgene0448_novel01	Novelgene0448	lncRNA	2001	1
Novelgene2763_novel01	Novelgene2763	lncRNA	2177	1
Novelgene0277_novel01	Novelgene0277	lncRNA	1078	1
TnS000387913g07_novel03	TnS000387913g07	lncRNA	214	1
TnS000385947g01_novel02	TnS000385947g01	lncRNA	3378	1
Novelgene4008_novel01	Novelgene4008	lncRNA	2491	1
TnS000313131g02_novel04	TnS000313131g02	lncRNA	1084	6
TnS000996777g01_novel02	TnS000996777g01	lncRNA	2857	2
TnS000041023g02_novel06	TnS000041023g02	lncRNA	2325	1
Novelgene1952_novel01	Novelgene1952	lncRNA	3021	2
TnS000873143g01_novel11	TnS000873143g01	lncRNA	2079	1
Novelgene1188_novel01	Novelgene1188	lncRNA	1187	1
Novelgene2335_novel01	Novelgene2335	lncRNA	3662	1
TnS000295087g03_novel04	TnS000295087g03	lncRNA	1750	1
Novelgene3046_novel01	Novelgene3046	lncRNA	1427	1
Novelgene3247_novel01	Novelgene3247	lncRNA	1900	4
Novelgene1835_novel01	Novelgene1835	lncRNA	3765	2
TnS000537325g04_novel01	TnS000537325g04	lncRNA	4376	1
Novelgene0974_novel01	Novelgene0974	lncRNA	3644	1
Novelgene0891_novel01	Novelgene0891	lncRNA	2036	1
TnS000796907g02_novel06	TnS000796907g02	lncRNA	3210	1
Novelgene1454_novel01	Novelgene1454	lncRNA	2135	2
TnS000015095g02_novel04	TnS000015095g02	lncRNA	2938	1
TnS000804805g02_novel02	TnS000804805g02	lncRNA	3023	1
TnS000779281g01_novel01	TnS000779281g01	lncRNA	1453	1
Novelgene0571_novel01	Novelgene0571	lncRNA	312	1
Novelgene3498_novel01	Novelgene3498	lncRNA	2774	1
TnS000008893g01_novel04	TnS000008893g01	lncRNA	4072	1
TnS000085963g03_novel05	TnS000085963g03	lncRNA	2178	1
Novelgene2305_novel02	Novelgene2305	lncRNA	4478	1
Novelgene1352_novel01	Novelgene1352	lncRNA	2179	1
Novelgene3235_novel01	Novelgene3235	lncRNA	1313	1
TnS000493429g11_novel03	TnS000493429g11	lncRNA	4508	1
TnS000915481g02_novel04	TnS000915481g02	lncRNA	509	2
Novelgene2559_novel01	Novelgene2559	lncRNA	2240	1
Novelgene1591_novel01	Novelgene1591	lncRNA	2072	1
Novelgene0911_novel01	Novelgene0911	lncRNA	3003	1
TnS000097109g01_novel02	TnS000097109g01	lncRNA	306	1
TnS000021995g04_novel03	TnS000021995g04	lncRNA	4206	1
TnS000070333g02_novel04	TnS000070333g02	lncRNA	2580	3
TnS000201295g01_novel08	TnS000201295g01	lncRNA	342	1
TnS000552883g08_novel03	TnS000552883g08	lncRNA	1481	1
Novelgene1269_novel01	Novelgene1269	lncRNA	2136	1
TnS000099607g01_novel03	TnS000099607g01	lncRNA	2890	1
TnS000865407g04_novel01	TnS000865407g04	lncRNA	3309	1
TnS000290929g02_novel07	TnS000290929g02	lncRNA	4808	1
TnS000842779g02_novel04	TnS000842779g02	lncRNA	3533	2
Novelgene3001_novel01	Novelgene3001	lncRNA	4410	1
TnS000963245g01_novel03	TnS000963245g01	lncRNA	3130	1
Novelgene1468_novel01	Novelgene1468	lncRNA	2025	1
TnS001009357g02_novel02	TnS001009357g02	lncRNA	5012	1
Novelgene0501_novel01	Novelgene0501	lncRNA	1449	1
TnS000058615g02_novel01	TnS000058615g02	lncRNA	1672	1
Novelgene2531_novel01	Novelgene2531	lncRNA	498	1
Novelgene1938_novel01	Novelgene1938	lncRNA	3471	1
Novelgene1353_novel01	Novelgene1353	lncRNA	2751	2
Novelgene2373_novel01	Novelgene2373	lncRNA	5019	2
Novelgene2104_novel01	Novelgene2104	lncRNA	3789	1
Novelgene0130_novel01	Novelgene0130	lncRNA	2840	1
TnS000783509g05_novel18	TnS000783509g05	lncRNA	4838	1
TnS000093481g07_novel01	TnS000093481g07	lncRNA	1773	1
TnS000936051g02_novel02	TnS000936051g02	lncRNA	298	1
Novelgene0866_novel01	Novelgene0866	lncRNA	4595	1
Novelgene0632_novel01	Novelgene0632	lncRNA	3128	1
Novelgene1513_novel01	Novelgene1513	lncRNA	3164	1
Novelgene3822_novel01	Novelgene3822	lncRNA	463	2
TnS000254899g01_novel04	TnS000254899g01	lncRNA	2116	1
Novelgene0848_novel01	Novelgene0848	lncRNA	1266	1
TnS000508917g06_novel04	TnS000508917g06	lncRNA	2622	1
Novelgene3548_novel03	Novelgene3548	lncRNA	6471	2
TnS000579701g02_novel04	TnS000579701g02	lncRNA	3904	1
Novelgene0309_novel01	Novelgene0309	lncRNA	2635	1
TnS000014993g05_novel02	TnS000014993g05	lncRNA	757	1
Novelgene3578_novel01	Novelgene3578	lncRNA	3653	3
TnS000462239g12_novel01	TnS000462239g12	lncRNA	3293	1
Novelgene2125_novel01	Novelgene2125	lncRNA	5449	1
TnS000994443g24_novel02	TnS000994443g24	lncRNA	1064	1
TnS000134093g15_novel02	TnS000134093g15	lncRNA	2650	1
Novelgene1228_novel01	Novelgene1228	lncRNA	5525	1
Novelgene1401_novel01	Novelgene1401	lncRNA	3289	1
Novelgene1587_novel01	Novelgene1587	lncRNA	3703	1
Novelgene1975_novel01	Novelgene1975	lncRNA	1208	1
Novelgene0724_novel01	Novelgene0724	lncRNA	7677	1
Novelgene0520_novel01	Novelgene0520	lncRNA	3243	1
TnS000776195g01_novel01	TnS000776195g01	lncRNA	3705	1
TnS000737927g02_novel02	TnS000737927g02	lncRNA	2330	1
Novelgene1725_novel01	Novelgene1725	lncRNA	4587	2
TnS000035771g11_novel01	TnS000035771g11	lncRNA	2030	2
TnS000948669g01_novel05	TnS000948669g01	lncRNA	7078	1
Novelgene2830_novel01	Novelgene2830	lncRNA	3710	3
Novelgene2918_novel01	Novelgene2918	lncRNA	2052	1
Novelgene1749_novel01	Novelgene1749	lncRNA	5975	1
Novelgene0352_novel01	Novelgene0352	lncRNA	2042	1
TnS000844871g02_novel04	TnS000844871g02	lncRNA	839	1
Novelgene3034_novel01	Novelgene3034	lncRNA	1389	1
Novelgene2616_novel01	Novelgene2616	lncRNA	2253	2
Novelgene3522_novel01	Novelgene3522	lncRNA	1877	1
Novelgene2770_novel02	Novelgene2770	lncRNA	271	1
Novelgene1578_novel01	Novelgene1578	lncRNA	3219	5
Novelgene1343_novel01	Novelgene1343	lncRNA	2137	1
Novelgene1659_novel01	Novelgene1659	lncRNA	1065	1
Novelgene3465_novel03	Novelgene3465	lncRNA	2874	1
TnS000027235g05_novel01	TnS000027235g05	lncRNA	1008	2
Novelgene1045_novel01	Novelgene1045	lncRNA	2706	1
Novelgene2351_novel01	Novelgene2351	lncRNA	1192	1
TnS000321571g06_novel06	TnS000321571g06	lncRNA	2259	1
Novelgene2429_novel04	Novelgene2429	lncRNA	4313	1
TnS000853829g02_novel01	TnS000853829g02	lncRNA	3515	1
Novelgene2563_novel01	Novelgene2563	lncRNA	2001	1
Novelgene0456_novel01	Novelgene0456	lncRNA	419	1
Novelgene0111_novel01	Novelgene0111	lncRNA	2366	1
Novelgene2835_novel02	Novelgene2835	lncRNA	365	1
TnS000948767g01_novel03	TnS000948767g01	lncRNA	2177	1
TnS000758993g06_novel07	TnS000758993g06	lncRNA	366	1
TnS000783257g01_novel04	TnS000783257g01	lncRNA	3249	1
Novelgene0824_novel01	Novelgene0824	lncRNA	1922	1
Novelgene1552_novel01	Novelgene1552	lncRNA	5315	1
Novelgene1412_novel01	Novelgene1412	lncRNA	3515	1
TnS000918259g03_novel04	TnS000918259g03	lncRNA	3534	1
Novelgene1547_novel01	Novelgene1547	lncRNA	2309	1
Novelgene2018_novel01	Novelgene2018	lncRNA	4982	1
TnS000127611g03_novel10	TnS000127611g03	lncRNA	2471	1
TnS000998475g04_novel04	TnS000998475g04	lncRNA	3568	1
Novelgene3117_novel01	Novelgene3117	lncRNA	3713	1
TnS000823713g01_novel11	TnS000823713g01	lncRNA	957	1
Novelgene0129_novel01	Novelgene0129	lncRNA	2593	1
TnS000283031g07_novel11	TnS000283031g07	lncRNA	826	1
Novelgene2725_novel01	Novelgene2725	lncRNA	2245	1
Novelgene0317_novel01	Novelgene0317	lncRNA	1267	3
Novelgene3480_novel02	Novelgene3480	lncRNA	2476	1
Novelgene0280_novel01	Novelgene0280	lncRNA	2413	5
TnS000728721g04_novel07	TnS000728721g04	lncRNA	2679	1
TnS000827077g01_novel04	TnS000827077g01	lncRNA	3490	1
Novelgene1626_novel01	Novelgene1626	lncRNA	2814	1
TnS000290929g02_novel09	TnS000290929g02	lncRNA	2342	1
Novelgene2960_novel03	Novelgene2960	lncRNA	1663	2
Novelgene2996_novel01	Novelgene2996	lncRNA	3737	1
TnS000895551g01_novel13	TnS000895551g01	lncRNA	1799	1
Novelgene1572_novel01	Novelgene1572	lncRNA	2534	2
Novelgene1497_novel01	Novelgene1497	lncRNA	1526	1
TnS000155889g09_novel01	TnS000155889g09	lncRNA	3025	2
TnS000488707g02_novel04	TnS000488707g02	lncRNA	1734	1
Novelgene2264_novel01	Novelgene2264	lncRNA	4881	1
TnS000594683g02_novel01	TnS000594683g02	lncRNA	2798	2
TnS000162553g01_novel05	TnS000162553g01	lncRNA	341	1
TnS000752563g02_novel05	TnS000752563g02	lncRNA	1878	1
Novelgene2609_novel01	Novelgene2609	lncRNA	5060	1
Novelgene2122_novel01	Novelgene2122	lncRNA	2585	1
Novelgene0523_novel01	Novelgene0523	lncRNA	1465	1
Novelgene0530_novel02	Novelgene0530	lncRNA	879	1
Novelgene3827_novel01	Novelgene3827	lncRNA	754	2
Novelgene0269_novel01	Novelgene0269	lncRNA	4034	1
Novelgene1739_novel01	Novelgene1739	lncRNA	3242	1
TnS001002431g01_novel02	TnS001002431g01	lncRNA	259	1
Novelgene0911_novel02	Novelgene0911	lncRNA	5191	1
TnS000824617g01_novel06	TnS000824617g01	lncRNA	1762	2
Novelgene0831_novel03	Novelgene0831	lncRNA	1486	1
TnS000441621g11_novel06	TnS000441621g11	lncRNA	1785	1
Novelgene3548_novel01	Novelgene3548	lncRNA	6021	2
Novelgene3722_novel01	Novelgene3722	lncRNA	531	1
Novelgene1493_novel01	Novelgene1493	lncRNA	3852	8
TnS000825637g02_novel05	TnS000825637g02	lncRNA	3142	1
TnS000400169g04_novel02	TnS000400169g04	lncRNA	538	1
TnS000172131g01_novel03	TnS000172131g01	lncRNA	1811	3
Novelgene3735_novel01	Novelgene3735	lncRNA	1610	4
TnS000879889g05_novel02	TnS000879889g05	lncRNA	2948	1
Novelgene1103_novel02	Novelgene1103	lncRNA	1307	1
Novelgene0738_novel07	Novelgene0738	lncRNA	1314	1
Novelgene2960_novel01	Novelgene2960	lncRNA	2237	1
Novelgene3453_novel01	Novelgene3453	lncRNA	2687	3
Novelgene3936_novel01	Novelgene3936	lncRNA	790	2
Novelgene2073_novel01	Novelgene2073	lncRNA	5254	1
TnS000461511g08_novel02	TnS000461511g08	lncRNA	4005	1
TnS000075981g07_novel02	TnS000075981g07	lncRNA	315	1
Novelgene3870_novel01	Novelgene3870	lncRNA	4343	2
Novelgene1843_novel01	Novelgene1843	lncRNA	5590	1
Novelgene2731_novel01	Novelgene2731	lncRNA	4823	1
TnS000035493g10_novel07	TnS000035493g10	lncRNA	539	2
Novelgene0489_novel01	Novelgene0489	lncRNA	3251	1
TnS000417301g02_novel07	TnS000417301g02	lncRNA	2339	1
TnS000006441g05_novel03	TnS000006441g05	lncRNA	250	2
Novelgene2112_novel01	Novelgene2112	lncRNA	2078	1
Novelgene2021_novel01	Novelgene2021	lncRNA	422	1
TnS000203073g10_novel02	TnS000203073g10	lncRNA	3883	1
TnS000171641g02_novel02	TnS000171641g02	lncRNA	1445	1
Novelgene1968_novel03	Novelgene1968	lncRNA	2577	1
Novelgene2865_novel01	Novelgene2865	lncRNA	6232	1
Novelgene0647_novel01	Novelgene0647	lncRNA	1466	1
TnS000100047g04_novel02	TnS000100047g04	lncRNA	2710	2
TnS000980361g10_novel02	TnS000980361g10	lncRNA	2101	1
Novelgene0124_novel01	Novelgene0124	lncRNA	3380	1
Novelgene1064_novel01	Novelgene1064	lncRNA	1183	2
TnS000382299g03_novel03	TnS000382299g03	lncRNA	3168	1
Novelgene3346_novel01	Novelgene3346	lncRNA	3288	1
TnS000146153g05_novel07	TnS000146153g05	lncRNA	5225	1
Novelgene3515_novel01	Novelgene3515	lncRNA	2404	1
TnS000599807g01_novel02	TnS000599807g01	lncRNA	3562	1
Novelgene0008_novel01	Novelgene0008	lncRNA	4494	1
TnS000051575g17_novel05	TnS000051575g17	lncRNA	2511	1
TnS000339815t02	TnS000339815g02	lncRNA	834	1
Novelgene1160_novel01	Novelgene1160	lncRNA	917	1
TnS000571301g02_novel02	TnS000571301g02	lncRNA	4091	1
TnS000508917g09_novel02	TnS000508917g09	lncRNA	3720	2
TnS000672465g05_novel12	TnS000672465g05	lncRNA	2612	2
Novelgene3836_novel01	Novelgene3836	lncRNA	2241	2
Novelgene2892_novel02	Novelgene2892	lncRNA	2113	1
Novelgene0879_novel01	Novelgene0879	lncRNA	1466	1
Novelgene2303_novel01	Novelgene2303	lncRNA	2134	1
Novelgene2929_novel01	Novelgene2929	lncRNA	290	1
TnS000008661g06_novel01	TnS000008661g06	lncRNA	2763	3
Novelgene0473_novel01	Novelgene0473	lncRNA	2452	3
TnS000148149g11_novel01	TnS000148149g11	lncRNA	996	1
Novelgene2172_novel01	Novelgene2172	lncRNA	7142	2
Novelgene0762_novel02	Novelgene0762	lncRNA	4477	1
TnS000265641g02_novel04	TnS000265641g02	lncRNA	1973	1
Novelgene0105_novel01	Novelgene0105	lncRNA	2306	1
Novelgene1969_novel01	Novelgene1969	lncRNA	4136	1
TnS000507375g17_novel01	TnS000507375g17	lncRNA	386	1
Novelgene0080_novel01	Novelgene0080	lncRNA	3141	1
TnS000583159g10_novel02	TnS000583159g10	lncRNA	4780	1
TnS000350571g01_novel01	TnS000350571g01	lncRNA	3312	8
TnS000012243g04_novel04	TnS000012243g04	lncRNA	1770	1
Novelgene0312_novel01	Novelgene0312	lncRNA	2887	1
Novelgene1455_novel01	Novelgene1455	lncRNA	3989	2
TnS000341661g01_novel02	TnS000341661g01	lncRNA	3799	1
Novelgene1676_novel01	Novelgene1676	lncRNA	1856	1
TnS000011433g04_novel02	TnS000011433g04	lncRNA	4684	2
Novelgene0558_novel01	Novelgene0558	lncRNA	2904	1
Novelgene2562_novel01	Novelgene2562	lncRNA	2851	1
Novelgene0736_novel01	Novelgene0736	lncRNA	2326	2
TnS000445133g01_novel01	TnS000445133g01	lncRNA	2818	2
Novelgene1982_novel01	Novelgene1982	lncRNA	2334	1
Novelgene0679_novel01	Novelgene0679	lncRNA	4128	1
TnS000888107g02_novel01	TnS000888107g02	lncRNA	3315	3
Novelgene2469_novel01	Novelgene2469	lncRNA	3138	3
TnS000166101g06_novel03	TnS000166101g06	lncRNA	1206	1
TnS000968413g01_novel04	TnS000968413g01	lncRNA	2846	2
Novelgene1607_novel02	Novelgene1607	lncRNA	2850	1
Novelgene1470_novel01	Novelgene1470	lncRNA	1889	1
Novelgene1467_novel01	Novelgene1467	lncRNA	549	1
Novelgene3271_novel02	Novelgene3271	lncRNA	5573	1
Novelgene2486_novel01	Novelgene2486	lncRNA	2148	1
TnS000059937g05_novel07	TnS000059937g05	lncRNA	3827	1
TnS000752021g01_novel01	TnS000752021g01	lncRNA	221	1
TnS000382299g03_novel01	TnS000382299g03	lncRNA	5246	1
TnS000144187g01_novel03	TnS000144187g01	lncRNA	2825	1
Novelgene2610_novel01	Novelgene2610	lncRNA	2493	1
Novelgene3335_novel01	Novelgene3335	lncRNA	2658	1
TnS000084833g03_novel01	TnS000084833g03	lncRNA	2817	2
Novelgene1830_novel02	Novelgene1830	lncRNA	291	1
Novelgene0832_novel01	Novelgene0832	lncRNA	1720	1
Novelgene3156_novel01	Novelgene3156	lncRNA	3200	2
Novelgene0034_novel04	Novelgene0034	lncRNA	3609	2
Novelgene0182_novel01	Novelgene0182	lncRNA	4975	1
TnS000862679g02_novel02	TnS000862679g02	lncRNA	2563	1
TnS000847253g15_novel06	TnS000847253g15	lncRNA	3136	2
TnS001015827g02_novel01	TnS001015827g02	lncRNA	291	1
Novelgene3538_novel02	Novelgene3538	lncRNA	1454	7
TnS000948767g01_novel04	TnS000948767g01	lncRNA	3638	1
TnS000382299g06_novel01	TnS000382299g06	lncRNA	2583	1
Novelgene3256_novel01	Novelgene3256	lncRNA	2155	1
Novelgene3601_novel01	Novelgene3601	lncRNA	4257	2
TnS001002831g02_novel02	TnS001002831g02	lncRNA	2570	3
Novelgene1186_novel01	Novelgene1186	lncRNA	1581	1
Novelgene1018_novel01	Novelgene1018	lncRNA	2467	1
TnS000408231g12_novel04	TnS000408231g12	lncRNA	320	1
TnS000164789g03_novel04	TnS000164789g03	lncRNA	4414	1
Novelgene3331_novel02	Novelgene3331	lncRNA	2234	2
Novelgene1733_novel01	Novelgene1733	lncRNA	2988	2
TnS000980175g01_novel07	TnS000980175g01	lncRNA	451	1
Novelgene3121_novel01	Novelgene3121	lncRNA	1529	1
Novelgene3647_novel01	Novelgene3647	lncRNA	5142	4
Novelgene0947_novel01	Novelgene0947	lncRNA	3350	3
TnS000473551g02_novel02	TnS000473551g02	lncRNA	2442	2
Novelgene0125_novel01	Novelgene0125	lncRNA	1830	1
TnS000182403g17_novel03	TnS000182403g17	lncRNA	1678	1
TnS000207249g07_novel01	TnS000207249g07	lncRNA	3680	1
Novelgene2939_novel01	Novelgene2939	lncRNA	3419	1
TnS000171641g04_novel04	TnS000171641g04	lncRNA	4358	1
TnS000824675g02_novel05	TnS000824675g02	lncRNA	2795	3
Novelgene2177_novel01	Novelgene2177	lncRNA	2638	1
Novelgene1811_novel01	Novelgene1811	lncRNA	4118	1
TnS000881329g01_novel02	TnS000881329g01	lncRNA	1894	1
TnS000939153g16_novel05	TnS000939153g16	lncRNA	525	1
TnS000623895g05_novel02	TnS000623895g05	lncRNA	348	1
TnS000241633g01_novel04	TnS000241633g01	lncRNA	3090	1
TnS000486687g02_novel04	TnS000486687g02	lncRNA	6407	3
TnS000052095g02_novel07	TnS000052095g02	lncRNA	2851	1
Novelgene0917_novel02	Novelgene0917	lncRNA	1906	1
Novelgene1413_novel01	Novelgene1413	lncRNA	6267	1
Novelgene0757_novel01	Novelgene0757	lncRNA	6382	1
TnS000734161g02_novel02	TnS000734161g02	lncRNA	5862	3
Novelgene1401_novel02	Novelgene1401	lncRNA	3254	2
Novelgene2757_novel01	Novelgene2757	lncRNA	3262	1
Novelgene2108_novel01	Novelgene2108	lncRNA	4198	1
TnS000205277g01_novel04	TnS000205277g01	lncRNA	2612	2
Novelgene2620_novel01	Novelgene2620	lncRNA	3208	1
Novelgene0780_novel01	Novelgene0780	lncRNA	1901	2
Novelgene1140_novel04	Novelgene1140	lncRNA	2270	3
TnS000450055g05_novel01	TnS000450055g05	lncRNA	3145	1
Novelgene0156_novel01	Novelgene0156	lncRNA	4854	1
Novelgene2641_novel01	Novelgene2641	lncRNA	3939	1
TnS000554901g01_novel02	TnS000554901g01	lncRNA	2729	1
Novelgene0011_novel01	Novelgene0011	lncRNA	5293	1
Novelgene3408_novel01	Novelgene3408	lncRNA	714	1
TnS000990499g03_novel03	TnS000990499g03	lncRNA	2805	3
TnS000131745g05_novel01	TnS000131745g05	lncRNA	2743	2
TnS000968413g01_novel01	TnS000968413g01	lncRNA	5572	2
Novelgene3232_novel01	Novelgene3232	lncRNA	812	2
Novelgene3153_novel01	Novelgene3153	lncRNA	940	1
Novelgene1660_novel02	Novelgene1660	lncRNA	5608	1
Novelgene2706_novel01	Novelgene2706	lncRNA	2147	1
Novelgene1743_novel01	Novelgene1743	lncRNA	332	1
Novelgene2208_novel01	Novelgene2208	lncRNA	2149	2
TnS001021915g01_novel01	TnS001021915g01	lncRNA	231	1
Novelgene2401_novel01	Novelgene2401	lncRNA	2566	2
TnS000109391g05_novel01	TnS000109391g05	lncRNA	3032	1
Novelgene1107_novel01	Novelgene1107	lncRNA	3295	1
Novelgene2829_novel01	Novelgene2829	lncRNA	4677	2
TnS000619877g01_novel04	TnS000619877g01	lncRNA	2714	1
Novelgene0065_novel01	Novelgene0065	lncRNA	3395	1
Novelgene1408_novel02	Novelgene1408	lncRNA	2721	3
Novelgene0569_novel01	Novelgene0569	lncRNA	2774	2
TnS000693233g03_novel04	TnS000693233g03	lncRNA	2296	1
TnS000159961g01_novel06	TnS000159961g01	lncRNA	3299	1
TnS000420861t01	TnS000420861g01	lncRNA	360	2
Novelgene2512_novel01	Novelgene2512	lncRNA	5618	3
Novelgene2701_novel03	Novelgene2701	lncRNA	2939	1
Novelgene3702_novel01	Novelgene3702	lncRNA	239	1
Novelgene2221_novel01	Novelgene2221	lncRNA	3824	1
Novelgene2463_novel04	Novelgene2463	lncRNA	2660	1
Novelgene3349_novel03	Novelgene3349	lncRNA	3021	1
TnS001002963g01_novel03	TnS001002963g01	lncRNA	1748	1
Novelgene2026_novel01	Novelgene2026	lncRNA	3388	2
TnS000739385g01_novel05	TnS000739385g01	lncRNA	2138	1
TnS000982373g01_novel08	TnS000982373g01	lncRNA	3748	1
Novelgene3019_novel02	Novelgene3019	lncRNA	3656	3
TnS001029283g02_novel06	TnS001029283g02	lncRNA	2612	2
TnS000486845g04_novel02	TnS000486845g04	lncRNA	2737	1
Novelgene1721_novel01	Novelgene1721	lncRNA	2722	1
Novelgene3613_novel03	Novelgene3613	lncRNA	323	1
Novelgene0526_novel02	Novelgene0526	lncRNA	2191	1
Novelgene1479_novel01	Novelgene1479	lncRNA	3543	1
Novelgene1903_novel01	Novelgene1903	lncRNA	3262	1
Novelgene0896_novel01	Novelgene0896	lncRNA	3261	1
TnS001002963g01_novel02	TnS001002963g01	lncRNA	3545	1
Novelgene3012_novel03	Novelgene3012	lncRNA	1505	1
TnS000844311t01	TnS000844311g01	lncRNA	632	1
TnS000940031g03_novel01	TnS000940031g03	lncRNA	651	3
Novelgene3961_novel02	Novelgene3961	lncRNA	1260	4
Novelgene2429_novel05	Novelgene2429	lncRNA	5974	2
TnS000835331g01_novel03	TnS000835331g01	lncRNA	4847	1
Novelgene2020_novel01	Novelgene2020	lncRNA	3378	2
Novelgene2036_novel01	Novelgene2036	lncRNA	2933	1
TnS000149933g04_novel04	TnS000149933g04	lncRNA	3473	2
TnS000759869g01_novel01	TnS000759869g01	lncRNA	4762	1
Novelgene3647_novel02	Novelgene3647	lncRNA	4945	3
TnS000097109g19_novel01	TnS000097109g19	lncRNA	2590	1
TnS000719089g19_novel03	TnS000719089g19	lncRNA	3139	1
Novelgene1297_novel01	Novelgene1297	lncRNA	258	1
Novelgene3009_novel02	Novelgene3009	lncRNA	1660	1
TnS000056229g03_novel02	TnS000056229g03	lncRNA	3823	2
Novelgene3169_novel01	Novelgene3169	lncRNA	1972	1
Novelgene1324_novel01	Novelgene1324	lncRNA	2197	1
TnS001026705g01_novel03	TnS001026705g01	lncRNA	5582	3
TnS000761035g01_novel03	TnS000761035g01	lncRNA	525	3
Novelgene0140_novel01	Novelgene0140	lncRNA	641	3
Novelgene2938_novel01	Novelgene2938	lncRNA	1645	1
Novelgene2960_novel05	Novelgene2960	lncRNA	1937	2
TnS000003591g03_novel03	TnS000003591g03	lncRNA	5701	1
TnS000823673g01_novel03	TnS000823673g01	lncRNA	4461	1
Novelgene2302_novel01	Novelgene2302	lncRNA	3170	1
Novelgene2534_novel01	Novelgene2534	lncRNA	2390	1
TnS000945599g01_novel05	TnS000945599g01	lncRNA	8106	2
TnS000265321g01_novel15	TnS000265321g01	lncRNA	4191	1
Novelgene1600_novel01	Novelgene1600	lncRNA	7222	1
Novelgene4005_novel01	Novelgene4005	lncRNA	2280	2
Novelgene2728_novel01	Novelgene2728	lncRNA	5512	1
Novelgene1541_novel01	Novelgene1541	lncRNA	2730	1
TnS000638177g13_novel03	TnS000638177g13	lncRNA	3683	1
TnS000895551g01_novel09	TnS000895551g01	lncRNA	2578	1
TnS000554901g04_novel03	TnS000554901g04	lncRNA	2116	1
Novelgene2039_novel01	Novelgene2039	lncRNA	1569	1
TnS000220241g01_novel02	TnS000220241g01	lncRNA	2707	1
Novelgene3148_novel01	Novelgene3148	lncRNA	2222	1
Novelgene0438_novel01	Novelgene0438	lncRNA	3222	2
Novelgene0723_novel01	Novelgene0723	lncRNA	3142	1
Novelgene1272_novel01	Novelgene1272	lncRNA	1775	1
TnS000667625g08_novel03	TnS000667625g08	lncRNA	4929	1
TnS000826455g04_novel02	TnS000826455g04	lncRNA	3706	1
Novelgene1180_novel01	Novelgene1180	lncRNA	3881	1
TnS000994153g01_novel02	TnS000994153g01	lncRNA	1062	4
Novelgene3298_novel01	Novelgene3298	lncRNA	4679	1
Novelgene2901_novel01	Novelgene2901	lncRNA	1309	1
TnS000409601g01_novel02	TnS000409601g01	lncRNA	2831	1
TnS000075981g07_novel01	TnS000075981g07	lncRNA	907	1
Novelgene0516_novel01	Novelgene0516	lncRNA	2797	1
Novelgene2038_novel01	Novelgene2038	lncRNA	5237	2
Novelgene1082_novel01	Novelgene1082	lncRNA	2381	1
Novelgene1737_novel01	Novelgene1737	lncRNA	3168	1
TnS000040405g01_novel14	TnS000040405g01	lncRNA	932	1
TnS000139427g05_novel06	TnS000139427g05	lncRNA	298	1
TnS000834345g02_novel01	TnS000834345g02	lncRNA	822	3
TnS000427849g03_novel01	TnS000427849g03	lncRNA	3110	1
TnS000027131g01_novel01	TnS000027131g01	lncRNA	986	1
Novelgene2815_novel01	Novelgene2815	lncRNA	3298	1
Novelgene0935_novel01	Novelgene0935	lncRNA	3711	2
Novelgene2818_novel01	Novelgene2818	lncRNA	4356	1
Novelgene2190_novel01	Novelgene2190	lncRNA	3267	1
TnS000138315g01_novel02	TnS000138315g01	lncRNA	212	1
Novelgene1551_novel01	Novelgene1551	lncRNA	3120	1
Novelgene3244_novel01	Novelgene3244	lncRNA	713	1
TnS000615439g05_novel03	TnS000615439g05	lncRNA	301	1
TnS000995183g02_novel01	TnS000995183g02	lncRNA	5998	1
Novelgene0225_novel03	Novelgene0225	lncRNA	2980	1
Novelgene2297_novel01	Novelgene2297	lncRNA	4715	1
TnS000047601g12_novel01	TnS000047601g12	lncRNA	546	3
TnS000926507g01_novel01	TnS000926507g01	lncRNA	856	2
Novelgene3079_novel01	Novelgene3079	lncRNA	1957	1
Novelgene1627_novel01	Novelgene1627	lncRNA	1482	1
Novelgene3481_novel01	Novelgene3481	lncRNA	5268	1
TnS000052095g02_novel09	TnS000052095g02	lncRNA	2538	1
Novelgene1242_novel01	Novelgene1242	lncRNA	4619	1
Novelgene0982_novel01	Novelgene0982	lncRNA	2947	1
TnS000027907g04_novel03	TnS000027907g04	lncRNA	3154	1
TnS000680989g05_novel02	TnS000680989g05	lncRNA	2992	2
TnS000958977g03_novel01	TnS000958977g03	lncRNA	2419	1
TnS001040437g02_novel01	TnS001040437g02	lncRNA	1748	3
Novelgene2808_novel03	Novelgene2808	lncRNA	1806	4
TnS000454109g02_novel02	TnS000454109g02	lncRNA	1442	3
TnS000833929g03_novel01	TnS000833929g03	lncRNA	3082	1
Novelgene2536_novel01	Novelgene2536	lncRNA	4200	1
TnS000290929g02_novel06	TnS000290929g02	lncRNA	1839	1
Novelgene1959_novel01	Novelgene1959	lncRNA	482	1
Novelgene0821_novel01	Novelgene0821	lncRNA	2222	1
TnS000332527g02_novel03	TnS000332527g02	lncRNA	793	1
Novelgene0288_novel01	Novelgene0288	lncRNA	2643	2
TnS000184341g01_novel01	TnS000184341g01	lncRNA	4163	1
Novelgene1254_novel01	Novelgene1254	lncRNA	752	3
Novelgene2625_novel01	Novelgene2625	lncRNA	2262	1
TnS000674083t01	TnS000674083g01	lncRNA	645	2
TnS000579701g02_novel01	TnS000579701g02	lncRNA	4107	2
TnS000576339g01_novel01	TnS000576339g01	lncRNA	3855	1
TnS000182335g03_novel01	TnS000182335g03	lncRNA	2777	1
Novelgene3080_novel01	Novelgene3080	lncRNA	2475	1
Novelgene1220_novel01	Novelgene1220	lncRNA	2772	2
Novelgene2617_novel06	Novelgene2617	lncRNA	2398	1
Novelgene3140_novel01	Novelgene3140	lncRNA	734	3
Novelgene3183_novel01	Novelgene3183	lncRNA	4544	1
Novelgene3199_novel01	Novelgene3199	lncRNA	3898	4
Novelgene2874_novel01	Novelgene2874	lncRNA	1266	1
TnS000387651g01_novel02	TnS000387651g01	lncRNA	2832	1
Novelgene0235_novel01	Novelgene0235	lncRNA	2784	2
TnS000215639g05_novel08	TnS000215639g05	lncRNA	396	1
Novelgene1885_novel01	Novelgene1885	lncRNA	4801	1
Novelgene2457_novel01	Novelgene2457	lncRNA	2678	1
Novelgene1461_novel01	Novelgene1461	lncRNA	1155	1
TnS000285415g01_novel01	TnS000285415g01	lncRNA	3083	1
TnS000907553g03_novel01	TnS000907553g03	lncRNA	1970	1
Novelgene0435_novel01	Novelgene0435	lncRNA	2777	1
Novelgene1487_novel01	Novelgene1487	lncRNA	2001	1
Novelgene3959_novel01	Novelgene3959	lncRNA	3285	2
Novelgene2674_novel02	Novelgene2674	lncRNA	2730	1
Novelgene1675_novel01	Novelgene1675	lncRNA	5034	1
TnS001029693g01_novel01	TnS001029693g01	lncRNA	4695	5
Novelgene1881_novel01	Novelgene1881	lncRNA	5312	1
TnS000003591g03_novel02	TnS000003591g03	lncRNA	4517	1
Novelgene3051_novel01	Novelgene3051	lncRNA	4516	1
Novelgene0102_novel01	Novelgene0102	lncRNA	3998	1
Novelgene0237_novel01	Novelgene0237	lncRNA	4027	1
Novelgene2421_novel04	Novelgene2421	lncRNA	561	3
Novelgene2912_novel01	Novelgene2912	lncRNA	3341	1
Novelgene1539_novel01	Novelgene1539	lncRNA	1948	2
TnS000364231g01_novel10	TnS000364231g01	lncRNA	2094	1
TnS000983035g01_novel03	TnS000983035g01	lncRNA	4518	1
Novelgene0847_novel01	Novelgene0847	lncRNA	1700	1
TnS000752331g01_novel04	TnS000752331g01	lncRNA	354	1
Novelgene1646_novel01	Novelgene1646	lncRNA	1340	1
TnS000963245g01_novel02	TnS000963245g01	lncRNA	3123	2
TnS000959203g01_novel04	TnS000959203g01	lncRNA	2166	1
Novelgene0982_novel02	Novelgene0982	lncRNA	1644	1
Novelgene1039_novel01	Novelgene1039	lncRNA	1312	1
Novelgene3252_novel01	Novelgene3252	lncRNA	880	1
Novelgene2610_novel02	Novelgene2610	lncRNA	4085	1
Novelgene2497_novel01	Novelgene2497	lncRNA	3217	1
TnS000842779g02_novel05	TnS000842779g02	lncRNA	3115	1
TnS000308751g10_novel05	TnS000308751g10	lncRNA	6175	1
Novelgene3458_novel01	Novelgene3458	lncRNA	4709	4
TnS000473551g03_novel04	TnS000473551g03	lncRNA	2272	2
Novelgene1124_novel01	Novelgene1124	lncRNA	2230	2
Novelgene0195_novel01	Novelgene0195	lncRNA	4697	1
Novelgene1606_novel01	Novelgene1606	lncRNA	843	1
Novelgene1182_novel01	Novelgene1182	lncRNA	1398	1
Novelgene0194_novel01	Novelgene0194	lncRNA	1153	1
TnS000987883g01_novel01	TnS000987883g01	lncRNA	4627	4
Novelgene0109_novel06	Novelgene0109	lncRNA	1058	1
Novelgene3583_novel01	Novelgene3583	lncRNA	2387	2
TnS000628203g17_novel02	TnS000628203g17	lncRNA	1911	2
Novelgene3482_novel01	Novelgene3482	lncRNA	1262	1
Novelgene3759_novel03	Novelgene3759	lncRNA	1163	2
Novelgene3336_novel02	Novelgene3336	lncRNA	3241	2
Novelgene3281_novel01	Novelgene3281	lncRNA	3271	1
Novelgene0027_novel01	Novelgene0027	lncRNA	2808	1
TnS000424419g02_novel03	TnS000424419g02	lncRNA	1672	1
Novelgene0394_novel01	Novelgene0394	lncRNA	5252	1
Novelgene0912_novel01	Novelgene0912	lncRNA	1272	1
Novelgene2962_novel01	Novelgene2962	lncRNA	4717	1
Novelgene3944_novel01	Novelgene3944	lncRNA	585	2
TnS000541611g04_novel05	TnS000541611g04	lncRNA	2148	1
Novelgene1300_novel01	Novelgene1300	lncRNA	3908	1
Novelgene2357_novel01	Novelgene2357	lncRNA	249	1
TnS000401131t04	TnS000401131g04	lncRNA	772	2
Novelgene2799_novel01	Novelgene2799	lncRNA	2420	1
TnS000086295g01_novel02	TnS000086295g01	lncRNA	4255	2
Novelgene3965_novel01	Novelgene3965	lncRNA	3545	2
Novelgene2400_novel01	Novelgene2400	lncRNA	4805	1
Novelgene0653_novel01	Novelgene0653	lncRNA	3085	1
Novelgene1187_novel01	Novelgene1187	lncRNA	3973	1
TnS000918259g07_novel08	TnS000918259g07	lncRNA	300	1
TnS000968175g02_novel03	TnS000968175g02	lncRNA	3589	1
TnS000506745g03_novel03	TnS000506745g03	lncRNA	3854	3
Novelgene0085_novel01	Novelgene0085	lncRNA	4786	1
Novelgene1429_novel02	Novelgene1429	lncRNA	1615	1
Novelgene0379_novel01	Novelgene0379	lncRNA	2305	1
Novelgene3271_novel01	Novelgene3271	lncRNA	7584	2
Novelgene2807_novel01	Novelgene2807	lncRNA	3419	3
TnS000759065g02_novel05	TnS000759065g02	lncRNA	271	1
Novelgene0624_novel01	Novelgene0624	lncRNA	4018	1
Novelgene0327_novel01	Novelgene0327	lncRNA	1074	1
Novelgene0251_novel03	Novelgene0251	lncRNA	1603	2
Novelgene2599_novel01	Novelgene2599	lncRNA	1397	1
Novelgene0149_novel01	Novelgene0149	lncRNA	4461	1
Novelgene2518_novel01	Novelgene2518	lncRNA	1414	2
TnS000138725g01_novel03	TnS000138725g01	lncRNA	4038	1
Novelgene0013_novel18	Novelgene0013	lncRNA	870	1
Novelgene0155_novel01	Novelgene0155	lncRNA	3493	1
Novelgene2482_novel01	Novelgene2482	lncRNA	731	1
TnS000078877g02_novel04	TnS000078877g02	lncRNA	473	1
TnS000063137g01_novel01	TnS000063137g01	lncRNA	2861	3
Novelgene2469_novel02	Novelgene2469	lncRNA	2885	2
TnS000408583g02_novel06	TnS000408583g02	lncRNA	2751	1
TnS000220661g01_novel06	TnS000220661g01	lncRNA	2265	1
TnS000338169t01	TnS000338169g01	lncRNA	670	2
Novelgene2719_novel01	Novelgene2719	lncRNA	1064	1
Novelgene3701_novel01	Novelgene3701	lncRNA	1173	5
TnS000580017g02_novel01	TnS000580017g02	lncRNA	5509	1
Novelgene3831_novel01	Novelgene3831	lncRNA	2176	1
Novelgene3027_novel01	Novelgene3027	lncRNA	3255	1
TnS000366965g05_novel01	TnS000366965g05	lncRNA	4491	2
Novelgene1946_novel01	Novelgene1946	lncRNA	4896	1
TnS000494949g02_novel04	TnS000494949g02	lncRNA	2000	1
TnS000060165g04_novel08	TnS000060165g04	lncRNA	2749	1
Novelgene0711_novel01	Novelgene0711	lncRNA	218	1
Novelgene0334_novel01	Novelgene0334	lncRNA	2910	1
Novelgene1615_novel02	Novelgene1615	lncRNA	2698	1
Novelgene2690_novel01	Novelgene2690	lncRNA	2581	1
Novelgene0421_novel01	Novelgene0421	lncRNA	2335	1
TnS000198223g01_novel08	TnS000198223g01	lncRNA	2627	1
TnS000624323g02_novel15	TnS000624323g02	lncRNA	2510	1
Novelgene0849_novel01	Novelgene0849	lncRNA	2202	11
TnS000450809g01_novel08	TnS000450809g01	lncRNA	2786	2
Novelgene1680_novel01	Novelgene1680	lncRNA	1426	1
TnS000058197g01_novel01	TnS000058197g01	lncRNA	2046	1
TnS001039451g02_novel04	TnS001039451g02	lncRNA	3101	1
Novelgene2381_novel01	Novelgene2381	lncRNA	1397	1
Novelgene1927_novel01	Novelgene1927	lncRNA	3433	1
TnS000324377g01_novel01	TnS000324377g01	lncRNA	621	1
TnS000141115g01_novel01	TnS000141115g01	lncRNA	2514	2
TnS000062385g02_novel06	TnS000062385g02	lncRNA	3287	1
TnS000162935g05_novel01	TnS000162935g05	lncRNA	451	1
Novelgene3105_novel01	Novelgene3105	lncRNA	2224	1
TnS000254749g09_novel01	TnS000254749g09	lncRNA	2626	1
Novelgene0738_novel06	Novelgene0738	lncRNA	3422	1
TnS000055399g03_novel09	TnS000055399g03	lncRNA	1814	2
Novelgene2274_novel01	Novelgene2274	lncRNA	2194	1
TnS000138315g02_novel07	TnS000138315g02	lncRNA	1803	1
Novelgene0238_novel01	Novelgene0238	lncRNA	3190	2
TnS000389811g02_novel03	TnS000389811g02	lncRNA	803	1
Novelgene0961_novel01	Novelgene0961	lncRNA	1170	1
TnS000238613g01_novel05	TnS000238613g01	lncRNA	1573	1
TnS000947727g01_novel18	TnS000947727g01	lncRNA	2940	1
Novelgene1464_novel01	Novelgene1464	lncRNA	2841	1
TnS000233461g02_novel03	TnS000233461g02	lncRNA	2522	1
Novelgene2621_novel01	Novelgene2621	lncRNA	2966	1
TnS000799141g01_novel04	TnS000799141g01	lncRNA	2348	1
Novelgene2968_novel01	Novelgene2968	lncRNA	4877	2
Novelgene0307_novel01	Novelgene0307	lncRNA	4178	1
Novelgene3044_novel01	Novelgene3044	lncRNA	2050	1
TnS000218409g01_novel07	TnS000218409g01	lncRNA	3480	1
TnS000739813g05_novel06	TnS000739813g05	lncRNA	4865	1
TnS000948767g01_novel02	TnS000948767g01	lncRNA	4354	1
Novelgene3704_novel01	Novelgene3704	lncRNA	3350	3
TnS000723435g06_novel12	TnS000723435g06	lncRNA	2882	1
TnS000765081g06_novel06	TnS000765081g06	lncRNA	2414	1
TnS000934095g04_novel02	TnS000934095g04	lncRNA	4789	3
TnS000898487g02_novel01	TnS000898487g02	lncRNA	2891	1
TnS000948669g01_novel08	TnS000948669g01	lncRNA	4660	1
Novelgene3812_novel01	Novelgene3812	lncRNA	1709	2
TnS000497711g03_novel02	TnS000497711g03	lncRNA	897	1
Novelgene0109_novel09	Novelgene0109	lncRNA	1592	1
TnS000297983g03_novel02	TnS000297983g03	lncRNA	1416	2
Novelgene1235_novel01	Novelgene1235	lncRNA	2498	1
Novelgene1421_novel01	Novelgene1421	lncRNA	2976	1
TnS000624169g01_novel07	TnS000624169g01	lncRNA	1357	1
TnS000943209g07_novel02	TnS000943209g07	lncRNA	372	1
TnS001029283g02_novel05	TnS001029283g02	lncRNA	3277	1
Novelgene1459_novel01	Novelgene1459	lncRNA	2039	2
Novelgene2862_novel01	Novelgene2862	lncRNA	3432	1
Novelgene1911_novel01	Novelgene1911	lncRNA	5709	1
Novelgene2960_novel04	Novelgene2960	lncRNA	1908	2
TnS000191009g02_novel01	TnS000191009g02	lncRNA	5246	5
TnS000989323g06_novel03	TnS000989323g06	lncRNA	825	2
TnS000441621g10_novel05	TnS000441621g10	lncRNA	1168	1
TnS000145195g10_novel02	TnS000145195g10	lncRNA	366	1
Novelgene1949_novel01	Novelgene1949	lncRNA	3455	1
Novelgene0478_novel01	Novelgene0478	lncRNA	2493	1
Novelgene3214_novel01	Novelgene3214	lncRNA	2520	1
Novelgene3280_novel01	Novelgene3280	lncRNA	1635	1
TnS000546657g02_novel12	TnS000546657g02	lncRNA	1721	1
TnS000232765g02_novel02	TnS000232765g02	lncRNA	4540	5
Novelgene1851_novel01	Novelgene1851	lncRNA	2403	1
Novelgene0898_novel01	Novelgene0898	lncRNA	3727	1
Novelgene2784_novel01	Novelgene2784	lncRNA	4698	1
Novelgene0935_novel02	Novelgene0935	lncRNA	4163	1
Novelgene0671_novel01	Novelgene0671	lncRNA	3824	1
Novelgene1419_novel01	Novelgene1419	lncRNA	2026	1
Novelgene0536_novel01	Novelgene0536	lncRNA	3376	1
Novelgene2352_novel01	Novelgene2352	lncRNA	2076	1
TnS000199233g01_novel01	TnS000199233g01	lncRNA	1224	5
TnS000661021g07_novel02	TnS000661021g07	lncRNA	4767	1
Novelgene2583_novel01	Novelgene2583	lncRNA	2668	2
Novelgene2453_novel01	Novelgene2453	lncRNA	1489	1
TnS000667719g07_novel10	TnS000667719g07	lncRNA	3328	1
TnS000848219g18_novel31	TnS000848219g18	lncRNA	1947	1
TnS000706135g01_novel04	TnS000706135g01	lncRNA	2119	5
Novelgene1099_novel01	Novelgene1099	lncRNA	4207	1
TnS000716791g03_novel01	TnS000716791g03	lncRNA	1531	3
TnS000891005g01_novel04	TnS000891005g01	lncRNA	2371	1
Novelgene0706_novel01	Novelgene0706	lncRNA	1920	1
TnS000008111g03_novel01	TnS000008111g03	lncRNA	6423	5
Novelgene2479_novel01	Novelgene2479	lncRNA	1998	1
TnS000203467g03_novel15	TnS000203467g03	lncRNA	4009	1
Novelgene1086_novel01	Novelgene1086	lncRNA	4595	1
Novelgene2933_novel01	Novelgene2933	lncRNA	4652	1
TnS000224633g01_novel01	TnS000224633g01	lncRNA	1569	1
TnS000258603g03_novel02	TnS000258603g03	lncRNA	4489	1
Novelgene2321_novel01	Novelgene2321	lncRNA	269	1
Novelgene1246_novel01	Novelgene1246	lncRNA	5819	1
TnS000968413g01_novel03	TnS000968413g01	lncRNA	2294	2
Novelgene0202_novel01	Novelgene0202	lncRNA	3760	1
Novelgene1103_novel01	Novelgene1103	lncRNA	4650	1
Novelgene2975_novel01	Novelgene2975	lncRNA	5151	1
TnS000516169g03_novel05	TnS000516169g03	lncRNA	233	1
Novelgene0635_novel02	Novelgene0635	lncRNA	1490	1
Novelgene3212_novel01	Novelgene3212	lncRNA	3931	1
Novelgene0305_novel01	Novelgene0305	lncRNA	2285	3
Novelgene1254_novel02	Novelgene1254	lncRNA	855	3
TnS000182121g07_novel01	TnS000182121g07	lncRNA	1533	1
TnS000954133g06_novel01	TnS000954133g06	lncRNA	4405	2
Novelgene3304_novel01	Novelgene3304	lncRNA	594	1
TnS000065009g03_novel03	TnS000065009g03	lncRNA	1431	1
TnS000579701g04_novel01	TnS000579701g04	lncRNA	2120	6
TnS001002091g07_novel04	TnS001002091g07	lncRNA	486	1
Novelgene3787_novel01	Novelgene3787	lncRNA	3552	2
Novelgene2331_novel01	Novelgene2331	lncRNA	962	2
Novelgene2620_novel02	Novelgene2620	lncRNA	3980	1
Novelgene0772_novel01	Novelgene0772	lncRNA	3751	1
TnS000895551g01_novel03	TnS000895551g01	lncRNA	3324	1
TnS000481265g10_novel06	TnS000481265g10	lncRNA	2382	2
Novelgene2297_novel02	Novelgene2297	lncRNA	5182	1
Novelgene1223_novel01	Novelgene1223	lncRNA	2347	1
Novelgene0927_novel01	Novelgene0927	lncRNA	2349	1
Novelgene2367_novel01	Novelgene2367	lncRNA	1203	1
TnS000750831g02_novel04	TnS000750831g02	lncRNA	2789	1
Novelgene1824_novel01	Novelgene1824	lncRNA	5220	1
Novelgene1752_novel01	Novelgene1752	lncRNA	3884	1
Novelgene3138_novel01	Novelgene3138	lncRNA	4347	1
TnS000780955g02_novel03	TnS000780955g02	lncRNA	3202	1
TnS000461511g12_novel02	TnS000461511g12	lncRNA	3297	2
TnS000881329g01_novel01	TnS000881329g01	lncRNA	4033	3
Novelgene1047_novel01	Novelgene1047	lncRNA	1585	1
Novelgene1112_novel01	Novelgene1112	lncRNA	1086	1
TnS000693233g03_novel03	TnS000693233g03	lncRNA	2798	1
Novelgene1592_novel01	Novelgene1592	lncRNA	2008	1
Novelgene2151_novel01	Novelgene2151	lncRNA	4956	1
Novelgene2638_novel01	Novelgene2638	lncRNA	399	1
Novelgene0167_novel01	Novelgene0167	lncRNA	2944	1
Novelgene1019_novel01	Novelgene1019	lncRNA	269	1
Novelgene3215_novel02	Novelgene3215	lncRNA	4754	1
TnS000266635g04_novel02	TnS000266635g04	lncRNA	4238	1
Novelgene2674_novel01	Novelgene2674	lncRNA	2816	2
TnS000494949g06_novel02	TnS000494949g06	lncRNA	5299	2
TnS000417301g01_novel01	TnS000417301g01	lncRNA	1966	1
Novelgene0093_novel01	Novelgene0093	lncRNA	2079	1
Novelgene1011_novel01	Novelgene1011	lncRNA	3843	1
TnS000797939g01_novel01	TnS000797939g01	lncRNA	1653	1
Novelgene1779_novel02	Novelgene1779	lncRNA	489	1
Novelgene3032_novel01	Novelgene3032	lncRNA	2803	6
TnS013912372g01_novel03	TnS013912372g01	lncRNA	2211	1
Novelgene3996_novel01	Novelgene3996	lncRNA	2279	3
TnS001008051g01_novel03	TnS001008051g01	lncRNA	379	1
TnS000688379g01_novel04	TnS000688379g01	lncRNA	233	1
Novelgene2635_novel01	Novelgene2635	lncRNA	3447	1
TnS000109587g01_novel10	TnS000109587g01	lncRNA	1552	1
TnS000401307g05_novel04	TnS000401307g05	lncRNA	3000	1
TnS000122145g10_novel01	TnS000122145g10	lncRNA	3770	6
Novelgene2586_novel01	Novelgene2586	lncRNA	4015	1
TnS000723435g06_novel07	TnS000723435g06	lncRNA	2831	1
Novelgene3584_novel01	Novelgene3584	lncRNA	6007	2
TnS000797021g01_novel04	TnS000797021g01	lncRNA	248	1
TnS000729017g02_novel05	TnS000729017g02	lncRNA	2004	2
Novelgene1270_novel01	Novelgene1270	lncRNA	1555	1
Novelgene2964_novel01	Novelgene2964	lncRNA	4424	1
TnS000615171g02_novel04	TnS000615171g02	lncRNA	2715	2
TnS000755945g01_novel01	TnS000755945g01	lncRNA	3312	1
TnS000121083g01_novel01	TnS000121083g01	lncRNA	277	1
Novelgene0625_novel01	Novelgene0625	lncRNA	2172	1
Novelgene3464_novel01	Novelgene3464	lncRNA	972	1
Novelgene1014_novel01	Novelgene1014	lncRNA	2191	1
Novelgene2527_novel01	Novelgene2527	lncRNA	2000	1
TnS000922505g05_novel08	TnS000922505g05	lncRNA	4583	2
Novelgene0221_novel02	Novelgene0221	lncRNA	2304	1
TnS000394139g05_novel01	TnS000394139g05	lncRNA	2211	1
Novelgene2837_novel01	Novelgene2837	lncRNA	2301	1
Novelgene2188_novel01	Novelgene2188	lncRNA	3941	1
Novelgene3475_novel01	Novelgene3475	lncRNA	4695	1
Novelgene2514_novel01	Novelgene2514	lncRNA	3090	1
Novelgene0148_novel01	Novelgene0148	lncRNA	1323	2
TnS000928569g02_novel04	TnS000928569g02	lncRNA	1934	1
Novelgene0738_novel02	Novelgene0738	lncRNA	3699	6
TnS000696823g03_novel01	TnS000696823g03	lncRNA	4396	2
Novelgene0581_novel03	Novelgene0581	lncRNA	1992	1
Novelgene1301_novel01	Novelgene1301	lncRNA	2055	1
TnS000253147g03_novel06	TnS000253147g03	lncRNA	2808	1
Novelgene0458_novel01	Novelgene0458	lncRNA	5406	2
Novelgene0251_novel02	Novelgene0251	lncRNA	2773	2
TnS000148855g01_novel02	TnS000148855g01	lncRNA	4030	2
TnS000974795g03_novel04	TnS000974795g03	lncRNA	231	1
Novelgene1887_novel01	Novelgene1887	lncRNA	4268	1
Novelgene3764_novel01	Novelgene3764	lncRNA	355	1
TnS000674141g27_novel01	TnS000674141g27	lncRNA	271	2
TnS000381831g01_novel03	TnS000381831g01	lncRNA	2366	1
Novelgene1414_novel01	Novelgene1414	lncRNA	3925	1
TnS000506745g01_novel04	TnS000506745g01	lncRNA	1143	1
TnS000623035g02_novel02	TnS000623035g02	lncRNA	276	1
TnS000070897g07_novel01	TnS000070897g07	lncRNA	306	2
TnS000002309g03_novel08	TnS000002309g03	lncRNA	1908	1
Novelgene3037_novel01	Novelgene3037	lncRNA	1704	5
TnS000159511g02_novel01	TnS000159511g02	lncRNA	228	1
TnS000287435g11_novel02	TnS000287435g11	lncRNA	3772	1
TnS000221649g02_novel02	TnS000221649g02	lncRNA	1727	1
Novelgene2617_novel01	Novelgene2617	lncRNA	1946	1
TnS000972625g07_novel01	TnS000972625g07	lncRNA	3138	6
TnS000933079g01_novel01	TnS000933079g01	lncRNA	2098	2
Novelgene0967_novel02	Novelgene0967	lncRNA	1084	1
TnS000286199g01_novel05	TnS000286199g01	lncRNA	2930	1
TnS000103485g01_novel02	TnS000103485g01	lncRNA	2934	2
Novelgene3297_novel01	Novelgene3297	lncRNA	2042	1
Novelgene0876_novel01	Novelgene0876	lncRNA	1580	1
Novelgene2463_novel02	Novelgene2463	lncRNA	1650	3
TnS000731583g06_novel12	TnS000731583g06	lncRNA	4695	1
Novelgene2536_novel02	Novelgene2536	lncRNA	2158	2
Novelgene3090_novel01	Novelgene3090	lncRNA	4312	1
Novelgene3233_novel01	Novelgene3233	lncRNA	315	1
Novelgene3486_novel01	Novelgene3486	lncRNA	2619	1
Novelgene1036_novel02	Novelgene1036	lncRNA	3858	1
Novelgene3170_novel02	Novelgene3170	lncRNA	2910	2
Novelgene3619_novel01	Novelgene3619	lncRNA	674	2
TnS000516847g02_novel06	TnS000516847g02	lncRNA	3242	2
Novelgene0205_novel02	Novelgene0205	lncRNA	2821	2
TnS000325143g01_novel02	TnS000325143g01	lncRNA	2158	1
TnS000583159g10_novel12	TnS000583159g10	lncRNA	5394	1
Novelgene2729_novel01	Novelgene2729	lncRNA	4877	1
Novelgene2876_novel01	Novelgene2876	lncRNA	3891	1
Novelgene0834_novel01	Novelgene0834	lncRNA	1540	2
Novelgene1933_novel01	Novelgene1933	lncRNA	1244	1
TnS000377993g01_novel01	TnS000377993g01	lncRNA	377	1
TnS000120933g16_novel04	TnS000120933g16	lncRNA	1046	1
Novelgene0454_novel01	Novelgene0454	lncRNA	2982	1
Novelgene3087_novel01	Novelgene3087	lncRNA	1984	1
TnS000541611g04_novel03	TnS000541611g04	lncRNA	2776	2
TnS000842779g02_novel06	TnS000842779g02	lncRNA	485	4
TnS000924487g01_novel06	TnS000924487g01	lncRNA	534	1
Novelgene1312_novel01	Novelgene1312	lncRNA	2791	1
Novelgene2956_novel01	Novelgene2956	lncRNA	2753	1
TnS000680989g05_novel03	TnS000680989g05	lncRNA	1990	1
TnS000366965g03_novel01	TnS000366965g03	lncRNA	2999	2
Novelgene0514_novel01	Novelgene0514	lncRNA	2667	1
Novelgene0593_novel02	Novelgene0593	lncRNA	1393	1
TnS000998475g04_novel05	TnS000998475g04	lncRNA	1332	1
Novelgene1889_novel01	Novelgene1889	lncRNA	2543	1
TnS000583159g10_novel13	TnS000583159g10	lncRNA	3189	1
Novelgene1637_novel01	Novelgene1637	lncRNA	323	1
Novelgene2279_novel01	Novelgene2279	lncRNA	2871	1
Novelgene0071_novel01	Novelgene0071	lncRNA	2931	1
Novelgene2429_novel02	Novelgene2429	lncRNA	5735	1
Novelgene0591_novel01	Novelgene0591	lncRNA	1915	1
Novelgene1751_novel01	Novelgene1751	lncRNA	4028	2
Novelgene1234_novel01	Novelgene1234	lncRNA	2381	1
TnS000679061g02_novel01	TnS000679061g02	lncRNA	5832	1
Novelgene0948_novel01	Novelgene0948	lncRNA	2914	1
TnS001029693g01_novel04	TnS001029693g01	lncRNA	2100	3
Novelgene3442_novel02	Novelgene3442	lncRNA	1394	1
Novelgene3508_novel01	Novelgene3508	lncRNA	4373	1
Novelgene1337_novel01	Novelgene1337	lncRNA	4121	1
TnS000517881g01_novel02	TnS000517881g01	lncRNA	3515	1
Novelgene1970_novel01	Novelgene1970	lncRNA	2075	1
Novelgene1869_novel01	Novelgene1869	lncRNA	6728	1
Novelgene2621_novel03	Novelgene2621	lncRNA	2910	1
Novelgene3436_novel01	Novelgene3436	lncRNA	4072	1
Novelgene3738_novel01	Novelgene3738	lncRNA	509	2
TnS000382299g06_novel03	TnS000382299g06	lncRNA	2766	1
Novelgene2561_novel01	Novelgene2561	lncRNA	5655	1
Novelgene0628_novel01	Novelgene0628	lncRNA	2328	1
TnS000516847g02_novel05	TnS000516847g02	lncRNA	3587	1
Novelgene2198_novel01	Novelgene2198	lncRNA	3327	3
Novelgene0179_novel01	Novelgene0179	lncRNA	4185	2
Novelgene3476_novel01	Novelgene3476	lncRNA	4426	1
Novelgene3331_novel01	Novelgene3331	lncRNA	2931	1
Novelgene3655_novel01	Novelgene3655	lncRNA	428	1
TnS000423067g03_novel06	TnS000423067g03	lncRNA	2063	1
Novelgene1944_novel01	Novelgene1944	lncRNA	5230	1
Novelgene2695_novel01	Novelgene2695	lncRNA	2448	1
TnS001025423g01_novel02	TnS001025423g01	lncRNA	3183	5
TnS000450809g01_novel09	TnS000450809g01	lncRNA	2287	1
Novelgene1164_novel03	Novelgene1164	lncRNA	1083	2
TnS000226197g06_novel03	TnS000226197g06	lncRNA	1138	1
TnS000169225g02_novel04	TnS000169225g02	lncRNA	3014	1
TnS000889393g04_novel03	TnS000889393g04	lncRNA	4624	1
Novelgene2422_novel01	Novelgene2422	lncRNA	4729	1
Novelgene3459_novel01	Novelgene3459	lncRNA	877	1
TnS000438403g07_novel01	TnS000438403g07	lncRNA	3520	8
TnS000498745g03_novel04	TnS000498745g03	lncRNA	2372	1
TnS000131895g02_novel01	TnS000131895g02	lncRNA	452	1
TnS000414359g01_novel07	TnS000414359g01	lncRNA	2965	2
TnS000918611g02_novel12	TnS000918611g02	lncRNA	1587	4
Novelgene2647_novel01	Novelgene2647	lncRNA	2629	1
TnS000400187g09_novel14	TnS000400187g09	lncRNA	1998	1
Novelgene1563_novel01	Novelgene1563	lncRNA	1375	1
TnS000849033g05_novel01	TnS000849033g05	lncRNA	1569	1
Novelgene1931_novel02	Novelgene1931	lncRNA	2429	1
Novelgene3132_novel01	Novelgene3132	lncRNA	1475	1
TnS000015235g07_novel02	TnS000015235g07	lncRNA	1518	2
Novelgene0477_novel01	Novelgene0477	lncRNA	1046	1
TnS000171755g05_novel10	TnS000171755g05	lncRNA	3470	1
Novelgene0276_novel02	Novelgene0276	lncRNA	738	2
Novelgene3543_novel01	Novelgene3543	lncRNA	4616	2
TnS000663753g20_novel04	TnS000663753g20	lncRNA	1968	1
TnS000440349g10_novel03	TnS000440349g10	lncRNA	1144	1
Novelgene2617_novel03	Novelgene2617	lncRNA	4273	1
Novelgene1208_novel01	Novelgene1208	lncRNA	5097	1
TnS000208411g04_novel01	TnS000208411g04	lncRNA	2469	1
Novelgene1665_novel01	Novelgene1665	lncRNA	3935	1
Novelgene0492_novel01	Novelgene0492	lncRNA	4208	1
Novelgene0153_novel01	Novelgene0153	lncRNA	1179	5
TnS000934095g04_novel05	TnS000934095g04	lncRNA	2304	1
TnS000915517g04_novel02	TnS000915517g04	lncRNA	1894	1
Novelgene0252_novel01	Novelgene0252	lncRNA	963	2
TnS000205277g01_novel03	TnS000205277g01	lncRNA	3805	1
TnS000164685g07_novel07	TnS000164685g07	lncRNA	3138	3
Novelgene0504_novel01	Novelgene0504	lncRNA	1666	1
TnS000889951g02_novel01	TnS000889951g02	lncRNA	866	1
TnS000983645g03_novel01	TnS000983645g03	lncRNA	4129	3
TnS000579701g02_novel03	TnS000579701g02	lncRNA	3389	1
Novelgene2037_novel01	Novelgene2037	lncRNA	5253	1
Novelgene2463_novel03	Novelgene2463	lncRNA	1584	2
Novelgene0771_novel03	Novelgene0771	lncRNA	1126	1
Novelgene2120_novel01	Novelgene2120	lncRNA	3835	1
TnS000796027g02_novel01	TnS000796027g02	lncRNA	2965	1
TnS000848219g18_novel30	TnS000848219g18	lncRNA	2056	2
TnS000465361g02_novel05	TnS000465361g02	lncRNA	2919	1
Novelgene2418_novel01	Novelgene2418	lncRNA	3114	1
TnS000100047g04_novel01	TnS000100047g04	lncRNA	3113	1
Novelgene1171_novel01	Novelgene1171	lncRNA	1335	1
TnS000190345g02_novel03	TnS000190345g02	lncRNA	237	1
Novelgene0356_novel01	Novelgene0356	lncRNA	4661	1
Novelgene2476_novel01	Novelgene2476	lncRNA	868	1
Novelgene0271_novel01	Novelgene0271	lncRNA	2276	1
Novelgene0725_novel01	Novelgene0725	lncRNA	2217	1
TnS001039289g03_novel01	TnS001039289g03	lncRNA	1948	1
Novelgene2020_novel02	Novelgene2020	lncRNA	294	1
Novelgene0900_novel01	Novelgene0900	lncRNA	516	1
TnS000420459g03_novel14	TnS000420459g03	lncRNA	1873	1
TnS000980175g01_novel06	TnS000980175g01	lncRNA	5114	1
Novelgene1962_novel01	Novelgene1962	lncRNA	2562	1
Novelgene0884_novel02	Novelgene0884	lncRNA	3015	1
Novelgene1102_novel01	Novelgene1102	lncRNA	1622	1
TnS000164789g03_novel03	TnS000164789g03	lncRNA	3505	1
Novelgene3245_novel01	Novelgene3245	lncRNA	1242	2
TnS000989177g02_novel02	TnS000989177g02	lncRNA	2974	3
Novelgene1279_novel01	Novelgene1279	lncRNA	1681	1
Novelgene2147_novel01	Novelgene2147	lncRNA	2583	1
TnS000933661g08_novel09	TnS000933661g08	lncRNA	788	1
Novelgene2958_novel01	Novelgene2958	lncRNA	1279	1
Novelgene2167_novel01	Novelgene2167	lncRNA	1854	3
TnS000792879g05_novel03	TnS000792879g05	lncRNA	2991	1
Novelgene2967_novel02	Novelgene2967	lncRNA	2290	1
Novelgene2617_novel05	Novelgene2617	lncRNA	1881	1
Novelgene0893_novel01	Novelgene0893	lncRNA	1504	1
Novelgene3665_novel01	Novelgene3665	lncRNA	3149	2
Novelgene3007_novel01	Novelgene3007	lncRNA	1222	1
Novelgene0941_novel01	Novelgene0941	lncRNA	4283	2
Novelgene3302_novel01	Novelgene3302	lncRNA	1081	1
Novelgene2642_novel02	Novelgene2642	lncRNA	2591	1
TnS000989323g06_novel02	TnS000989323g06	lncRNA	1854	1
Novelgene0538_novel01	Novelgene0538	lncRNA	1292	2
Novelgene0818_novel01	Novelgene0818	lncRNA	950	1
Novelgene0226_novel02	Novelgene0226	lncRNA	3888	1
Novelgene0918_novel01	Novelgene0918	lncRNA	2466	1
Novelgene0286_novel01	Novelgene0286	lncRNA	1524	1
Novelgene2179_novel01	Novelgene2179	lncRNA	4323	2
Novelgene2663_novel01	Novelgene2663	lncRNA	2570	2
TnS000752563g02_novel04	TnS000752563g02	lncRNA	4434	1
TnS000842779g02_novel08	TnS000842779g02	lncRNA	2840	3
Novelgene0716_novel01	Novelgene0716	lncRNA	1045	1
Novelgene0669_novel01	Novelgene0669	lncRNA	1479	1
Novelgene1307_novel01	Novelgene1307	lncRNA	1643	1
TnS000911035g14_novel01	TnS000911035g14	lncRNA	2160	2
Novelgene2915_novel01	Novelgene2915	lncRNA	1910	1
Novelgene2790_novel01	Novelgene2790	lncRNA	3570	1
TnS000418971g01_novel06	TnS000418971g01	lncRNA	3363	1
Novelgene3574_novel02	Novelgene3574	lncRNA	349	1
TnS000169225g02_novel01	TnS000169225g02	lncRNA	4939	3
Novelgene2636_novel01	Novelgene2636	lncRNA	3292	1
TnS000191543g01_novel03	TnS000191543g01	lncRNA	5043	1
Novelgene0073_novel01	Novelgene0073	lncRNA	2729	1
Novelgene3012_novel02	Novelgene3012	lncRNA	3372	1
Novelgene0412_novel01	Novelgene0412	lncRNA	2832	3
Novelgene3043_novel01	Novelgene3043	lncRNA	4478	1
Novelgene1097_novel01	Novelgene1097	lncRNA	5440	1
Novelgene1022_novel01	Novelgene1022	lncRNA	1554	2
Novelgene0161_novel01	Novelgene0161	lncRNA	754	1
TnS000580017g02_novel03	TnS000580017g02	lncRNA	4854	1
Novelgene2663_novel02	Novelgene2663	lncRNA	4424	1
TnS000461511g12_novel10	TnS000461511g12	lncRNA	2487	1
TnS000622211g02_novel05	TnS000622211g02	lncRNA	3412	1
TnS000591365g18_novel03	TnS000591365g18	lncRNA	3432	1
Novelgene3548_novel02	Novelgene3548	lncRNA	6430	3
TnS000079519g02_novel03	TnS000079519g02	lncRNA	861	1
Novelgene1636_novel01	Novelgene1636	lncRNA	1567	1
Novelgene1027_novel02	Novelgene1027	lncRNA	2908	1
TnS000838859g03_novel02	TnS000838859g03	lncRNA	2208	1
Novelgene3336_novel01	Novelgene3336	lncRNA	2311	1
Novelgene2254_novel01	Novelgene2254	lncRNA	2731	1
TnS013912372g01_novel04	TnS013912372g01	lncRNA	311	3
TnS000877475g03_novel09	TnS000877475g03	lncRNA	393	1
Novelgene1966_novel01	Novelgene1966	lncRNA	3210	2
TnS000798485g01_novel20	TnS000798485g01	lncRNA	792	1
TnS000290555g08_novel03	TnS000290555g08	lncRNA	493	1
Novelgene2732_novel01	Novelgene2732	lncRNA	3663	1
TnS000321571g06_novel08	TnS000321571g06	lncRNA	6127	1
TnS000494401g01_novel04	TnS000494401g01	lncRNA	6089	1
TnS000923915g02_novel04	TnS000923915g02	lncRNA	2637	2
Novelgene2389_novel01	Novelgene2389	lncRNA	1431	1
Novelgene2336_novel01	Novelgene2336	lncRNA	564	1
Novelgene0482_novel02	Novelgene0482	lncRNA	374	1
Novelgene0482_novel04	Novelgene0482	lncRNA	718	1
TnS000056229g02_novel02	TnS000056229g02	lncRNA	553	2
Novelgene2689_novel01	Novelgene2689	lncRNA	3216	1
Novelgene0455_novel01	Novelgene0455	lncRNA	4476	1
Novelgene0904_novel03	Novelgene0904	lncRNA	4171	1
Novelgene1338_novel01	Novelgene1338	lncRNA	1860	1
TnS000111477g08_novel08	TnS000111477g08	lncRNA	2332	1
Novelgene2289_novel01	Novelgene2289	lncRNA	2328	1
Novelgene1997_novel01	Novelgene1997	lncRNA	2765	1
Novelgene0236_novel01	Novelgene0236	lncRNA	3220	2
Novelgene2405_novel02	Novelgene2405	lncRNA	908	1
Novelgene2421_novel05	Novelgene2421	lncRNA	1009	1
TnS000738975g07_novel01	TnS000738975g07	lncRNA	4625	1
Novelgene0619_novel01	Novelgene0619	lncRNA	2046	1
Novelgene3817_novel01	Novelgene3817	lncRNA	2254	2
TnS000046261g08_novel06	TnS000046261g08	lncRNA	2195	1
Novelgene3961_novel04	Novelgene3961	lncRNA	361	1
Novelgene3287_novel01	Novelgene3287	lncRNA	4709	1
Novelgene0733_novel02	Novelgene0733	lncRNA	321	1
TnS000085963g03_novel04	TnS000085963g03	lncRNA	2962	1
Novelgene0857_novel01	Novelgene0857	lncRNA	2187	1
TnS000954133g03_novel02	TnS000954133g03	lncRNA	2752	1
Novelgene1087_novel01	Novelgene1087	lncRNA	3364	1
TnS000130907g01_novel03	TnS000130907g01	lncRNA	2691	1
Novelgene0422_novel02	Novelgene0422	lncRNA	2340	1
TnS000734161g02_novel04	TnS000734161g02	lncRNA	3813	1
Novelgene0422_novel01	Novelgene0422	lncRNA	5197	1
Novelgene2658_novel01	Novelgene2658	lncRNA	2028	1
Novelgene0620_novel01	Novelgene0620	lncRNA	2007	1
Novelgene0593_novel01	Novelgene0593	lncRNA	4099	1
Novelgene1649_novel02	Novelgene1649	lncRNA	822	2
Novelgene3334_novel01	Novelgene3334	lncRNA	3532	3
TnS000842589g05_novel02	TnS000842589g05	lncRNA	3028	1
Novelgene3477_novel01	Novelgene3477	lncRNA	3148	1
TnS000723155g04_novel01	TnS000723155g04	lncRNA	5163	1
Novelgene1072_novel01	Novelgene1072	lncRNA	203	1
Novelgene3357_novel01	Novelgene3357	lncRNA	2360	1
Novelgene1305_novel01	Novelgene1305	lncRNA	3127	1
Novelgene3369_novel01	Novelgene3369	lncRNA	1773	2
Novelgene0983_novel01	Novelgene0983	lncRNA	3775	1
TnS000674141g39_novel06	TnS000674141g39	lncRNA	2530	1
TnS000350571g01_novel02	TnS000350571g01	lncRNA	4757	1
Novelgene1071_novel01	Novelgene1071	lncRNA	3039	1
Novelgene1454_novel02	Novelgene1454	lncRNA	6159	1
TnS000060437g01_novel02	TnS000060437g01	lncRNA	2120	1
TnS000203073g12_novel08	TnS000203073g12	lncRNA	1262	1
TnS000306961g01_novel06	TnS000306961g01	lncRNA	2647	1
TnS000331995g05_novel01	TnS000331995g05	lncRNA	3251	1
TnS000164933g02_novel03	TnS000164933g02	lncRNA	426	3
Novelgene0993_novel02	Novelgene0993	lncRNA	2268	2
TnS000825637g02_novel02	TnS000825637g02	lncRNA	3517	1
Novelgene1710_novel02	Novelgene1710	lncRNA	2087	1
Novelgene0601_novel01	Novelgene0601	lncRNA	4606	1
Novelgene3626_novel01	Novelgene3626	lncRNA	1009	2
Novelgene2755_novel01	Novelgene2755	lncRNA	2576	1
TnS000853391g01_novel02	TnS000853391g01	lncRNA	1825	2
Novelgene1663_novel01	Novelgene1663	lncRNA	2138	1
Novelgene2037_novel02	Novelgene2037	lncRNA	4417	1
Novelgene1755_novel01	Novelgene1755	lncRNA	583	1
TnS000427783g10_novel01	TnS000427783g10	lncRNA	4677	4
TnS001029693g01_novel02	TnS001029693g01	lncRNA	4538	5
Novelgene2175_novel01	Novelgene2175	lncRNA	4555	1
TnS000895935g04_novel05	TnS000895935g04	lncRNA	2615	1
TnS000784981g07_novel09	TnS000784981g07	lncRNA	5413	1
Novelgene2768_novel01	Novelgene2768	lncRNA	2611	1
Novelgene3028_novel01	Novelgene3028	lncRNA	2482	1
Novelgene2832_novel01	Novelgene2832	lncRNA	2485	1
Novelgene3040_novel01	Novelgene3040	lncRNA	2120	2
Novelgene0326_novel02	Novelgene0326	lncRNA	1407	1
TnS000218409g01_novel06	TnS000218409g01	lncRNA	1187	1
Novelgene1793_novel01	Novelgene1793	lncRNA	1986	2
Novelgene1248_novel01	Novelgene1248	lncRNA	2816	1
TnS000418895g01_novel01	TnS000418895g01	lncRNA	3115	1
TnS000761293g03_novel03	TnS000761293g03	lncRNA	3555	1
TnS000836635g03_novel02	TnS000836635g03	lncRNA	478	1
Novelgene1818_novel01	Novelgene1818	lncRNA	4531	2
TnS000958977g03_novel02	TnS000958977g03	lncRNA	2565	2
Novelgene3621_novel01	Novelgene3621	lncRNA	1338	2
TnS000164789g03_novel05	TnS000164789g03	lncRNA	2930	2
Novelgene2256_novel01	Novelgene2256	lncRNA	956	1
TnS000615653g14_novel04	TnS000615653g14	lncRNA	1900	3
TnS000897855g09_novel03	TnS000897855g09	lncRNA	1876	1
TnS000909809g04_novel11	TnS000909809g04	lncRNA	273	1
TnS000633747g03_novel02	TnS000633747g03	lncRNA	1861	1
Novelgene3174_novel01	Novelgene3174	lncRNA	585	1
Novelgene2368_novel01	Novelgene2368	lncRNA	2266	1
Novelgene3342_novel01	Novelgene3342	lncRNA	1842	1
Novelgene1371_novel01	Novelgene1371	lncRNA	1306	1
TnS000413187g06_novel01	TnS000413187g06	lncRNA	3584	1
TnS000057085g05_novel02	TnS000057085g05	lncRNA	4945	2
Novelgene1660_novel01	Novelgene1660	lncRNA	2552	1
TnS001003867g02_novel01	TnS001003867g02	lncRNA	2895	1
TnS000975457g01_novel01	TnS000975457g01	lncRNA	843	4
Novelgene2319_novel01	Novelgene2319	lncRNA	3666	1
TnS000208343g02_novel08	TnS000208343g02	lncRNA	3199	1
TnS000661021g07_novel01	TnS000661021g07	lncRNA	2430	1
Novelgene2776_novel01	Novelgene2776	lncRNA	2286	1
Novelgene2965_novel01	Novelgene2965	lncRNA	6400	1
Novelgene3029_novel01	Novelgene3029	lncRNA	1641	1
Novelgene0580_novel01	Novelgene0580	lncRNA	4884	1
Novelgene1290_novel01	Novelgene1290	lncRNA	3151	2
Novelgene3663_novel01	Novelgene3663	lncRNA	1554	2
TnS000718023g03_novel01	TnS000718023g03	lncRNA	332	2
Novelgene3064_novel01	Novelgene3064	lncRNA	2994	1
TnS000615653g14_novel03	TnS000615653g14	lncRNA	2207	3
Novelgene0389_novel01	Novelgene0389	lncRNA	1386	1
Novelgene3672_novel01	Novelgene3672	lncRNA	2581	4
Novelgene1661_novel01	Novelgene1661	lncRNA	3023	1
TnS000041667g02_novel01	TnS000041667g02	lncRNA	3631	1
Novelgene0275_novel01	Novelgene0275	lncRNA	2392	2
Novelgene1365_novel01	Novelgene1365	lncRNA	2992	1
Novelgene2599_novel02	Novelgene2599	lncRNA	2024	1
Novelgene1707_novel01	Novelgene1707	lncRNA	1797	2
TnS000990499g03_novel01	TnS000990499g03	lncRNA	2722	2
Novelgene2160_novel01	Novelgene2160	lncRNA	4569	1
Novelgene2617_novel04	Novelgene2617	lncRNA	4701	1
TnS001039363g10_novel04	TnS001039363g10	lncRNA	4490	1
Novelgene0644_novel01	Novelgene0644	lncRNA	4494	1
Novelgene2882_novel01	Novelgene2882	lncRNA	4839	1
Novelgene0751_novel01	Novelgene0751	lncRNA	4533	1
Novelgene2652_novel02	Novelgene2652	lncRNA	236	1
TnS000734207g02_novel04	TnS000734207g02	lncRNA	4054	1
TnS000821265g09_novel01	TnS000821265g09	lncRNA	1574	2
Novelgene3961_novel03	Novelgene3961	lncRNA	1439	3
Novelgene1718_novel01	Novelgene1718	lncRNA	1033	1
Novelgene1060_novel01	Novelgene1060	lncRNA	4602	1
Novelgene0814_novel01	Novelgene0814	lncRNA	4697	2
TnS000000671g03_novel08	TnS000000671g03	lncRNA	1197	1
TnS001028123g01_novel03	TnS001028123g01	lncRNA	2492	1
Novelgene2556_novel01	Novelgene2556	lncRNA	3127	1
Novelgene0200_novel01	Novelgene0200	lncRNA	855	1
Novelgene1826_novel01	Novelgene1826	lncRNA	609	1
Novelgene3647_novel03	Novelgene3647	lncRNA	4867	3
Novelgene3782_novel01	Novelgene3782	lncRNA	1545	1
TnS001020801g01_novel05	TnS001020801g01	lncRNA	3361	2
Novelgene0826_novel01	Novelgene0826	lncRNA	2612	1
Novelgene2780_novel01	Novelgene2780	lncRNA	2392	1
TnS000418971g01_novel09	TnS000418971g01	lncRNA	3862	1
Novelgene1783_novel01	Novelgene1783	lncRNA	1514	1
TnS000409729g09_novel01	TnS000409729g09	lncRNA	252	1
Novelgene1967_novel04	Novelgene1967	lncRNA	2101	1
Novelgene3902_novel01	Novelgene3902	lncRNA	4279	3
Novelgene3818_novel01	Novelgene3818	lncRNA	1734	7
Novelgene2298_novel01	Novelgene2298	lncRNA	1422	3
TnS000012717g01_novel03	TnS000012717g01	lncRNA	416	1
TnS000435721g25_novel01	TnS000435721g25	lncRNA	2870	1
Novelgene1005_novel01	Novelgene1005	lncRNA	3434	1
Novelgene3299_novel12	Novelgene3299	lncRNA	212	2
Novelgene3316_novel01	Novelgene3316	lncRNA	2559	1
Novelgene1265_novel01	Novelgene1265	lncRNA	1753	1
TnS000222675g05_novel06	TnS000222675g05	lncRNA	2725	1
TnS000809851g29_novel08	TnS000809851g29	lncRNA	356	1
TnS000593511g02_novel01	TnS000593511g02	lncRNA	3271	2
Novelgene1471_novel01	Novelgene1471	lncRNA	6154	1
Novelgene2604_novel02	Novelgene2604	lncRNA	4218	1
Novelgene1056_novel01	Novelgene1056	lncRNA	2818	1
Novelgene0262_novel01	Novelgene0262	lncRNA	1229	1
Novelgene3338_novel01	Novelgene3338	lncRNA	2651	1
Novelgene1366_novel01	Novelgene1366	lncRNA	3072	1
TnS000066331g11_novel02	TnS000066331g11	lncRNA	380	1
Novelgene3101_novel01	Novelgene3101	lncRNA	3000	1
TnS000946201g02_novel01	TnS000946201g02	lncRNA	1987	1
TnS000134919g02_novel02	TnS000134919g02	lncRNA	4846	2
Novelgene0249_novel01	Novelgene0249	lncRNA	2834	1
Novelgene0066_novel01	Novelgene0066	lncRNA	2107	1
TnS000123981g02_novel02	TnS000123981g02	lncRNA	1514	1
TnS000958347g02_novel02	TnS000958347g02	lncRNA	5402	1
Novelgene0915_novel01	Novelgene0915	lncRNA	3320	1
TnS000252263g01_novel06	TnS000252263g01	lncRNA	2468	3
Novelgene0222_novel01	Novelgene0222	lncRNA	1381	1
TnS000001873g02_novel01	TnS000001873g02	lncRNA	2516	1
TnS000681293g02_novel01	TnS000681293g02	lncRNA	872	1
Novelgene3364_novel01	Novelgene3364	lncRNA	3952	1
TnS000084833g06_novel09	TnS000084833g06	lncRNA	4947	2
Novelgene0292_novel01	Novelgene0292	lncRNA	2779	1
Novelgene0434_novel01	Novelgene0434	lncRNA	695	1
Novelgene0354_novel01	Novelgene0354	lncRNA	3271	1
TnS000974229g04_novel01	TnS000974229g04	lncRNA	2029	1
Novelgene1989_novel02	Novelgene1989	lncRNA	605	1
Novelgene2217_novel01	Novelgene2217	lncRNA	2337	1
Novelgene2397_novel01	Novelgene2397	lncRNA	3308	1
Novelgene2298_novel02	Novelgene2298	lncRNA	1806	6
Novelgene1088_novel01	Novelgene1088	lncRNA	2673	1
Novelgene1335_novel01	Novelgene1335	lncRNA	1867	1
TnS000479359g02_novel04	TnS000479359g02	lncRNA	4459	1
Novelgene3238_novel01	Novelgene3238	lncRNA	3861	3
Novelgene2510_novel01	Novelgene2510	lncRNA	2616	1
Novelgene1632_novel01	Novelgene1632	lncRNA	2529	1
Novelgene0453_novel01	Novelgene0453	lncRNA	378	1
Novelgene3236_novel01	Novelgene3236	lncRNA	2257	1
Novelgene0726_novel03	Novelgene0726	lncRNA	3176	1
TnS000895181g23_novel03	TnS000895181g23	lncRNA	329	1
Novelgene1320_novel01	Novelgene1320	lncRNA	4128	1
Novelgene1670_novel01	Novelgene1670	lncRNA	2189	1
TnS000022753g10_novel04	TnS000022753g10	lncRNA	2076	1
Novelgene0408_novel01	Novelgene0408	lncRNA	1983	1
TnS000215639g07_novel02	TnS000215639g07	lncRNA	2366	1
TnS000167913g03_novel02	TnS000167913g03	lncRNA	1656	1
Novelgene0850_novel01	Novelgene0850	lncRNA	1912	1
TnS000948669g01_novel06	TnS000948669g01	lncRNA	2084	1
TnS000079519g02_novel02	TnS000079519g02	lncRNA	3735	1
Novelgene2118_novel02	Novelgene2118	lncRNA	3920	2
TnS000090407g02_novel01	TnS000090407g02	lncRNA	3112	1
TnS000015235g07_novel01	TnS000015235g07	lncRNA	2980	1
Novelgene3480_novel01	Novelgene3480	lncRNA	4099	1
TnS000655603g05_novel02	TnS000655603g05	lncRNA	2343	2
TnS000540273g01_novel01	TnS000540273g01	lncRNA	776	1
Novelgene2648_novel01	Novelgene2648	lncRNA	5792	1
TnS000738975g05_novel01	TnS000738975g05	lncRNA	4549	2
TnS000253501g04_novel01	TnS000253501g04	lncRNA	2839	2
Novelgene1800_novel01	Novelgene1800	lncRNA	2925	1
Novelgene2053_novel01	Novelgene2053	lncRNA	4986	1
TnS000145039g01_novel07	TnS000145039g01	lncRNA	967	1
TnS000321571g06_novel05	TnS000321571g06	lncRNA	4644	1
Novelgene0984_novel01	Novelgene0984	lncRNA	2395	1
TnS000915177g01_novel01	TnS000915177g01	lncRNA	1062	3
Novelgene2116_novel01	Novelgene2116	lncRNA	5147	1
Novelgene1177_novel01	Novelgene1177	lncRNA	4181	2
TnS000171755g05_novel08	TnS000171755g05	lncRNA	3112	1
TnS000191751g02_novel01	TnS000191751g02	lncRNA	313	1
Novelgene1818_novel02	Novelgene1818	lncRNA	4139	1
TnS000958809g04_novel02	TnS000958809g04	lncRNA	312	1
TnS000401307g05_novel03	TnS000401307g05	lncRNA	3134	1
TnS001009357g02_novel01	TnS001009357g02	lncRNA	5016	1
TnS000853829g02_novel03	TnS000853829g02	lncRNA	5115	1
TnS000009425g12_novel02	TnS000009425g12	lncRNA	3999	1
TnS000677859g01_novel13	TnS000677859g01	lncRNA	4571	1
Novelgene2588_novel01	Novelgene2588	lncRNA	4432	1
Novelgene1226_novel02	Novelgene1226	lncRNA	1737	2
TnS000247985g15_novel03	TnS000247985g15	lncRNA	4099	2
Novelgene1010_novel01	Novelgene1010	lncRNA	1764	1
TnS000516169t01	TnS000516169g01	lncRNA	904	3
Novelgene3154_novel01	Novelgene3154	lncRNA	3096	1
TnS000382397g01_novel01	TnS000382397g01	lncRNA	1929	1
Novelgene0035_novel01	Novelgene0035	lncRNA	4786	2
Novelgene2358_novel01	Novelgene2358	lncRNA	436	1
Novelgene2132_novel01	Novelgene2132	lncRNA	1192	1
Novelgene0541_novel01	Novelgene0541	lncRNA	3102	1
TnS000004985g05_novel01	TnS000004985g05	lncRNA	4224	3
Novelgene0512_novel01	Novelgene0512	lncRNA	3184	1
Novelgene1422_novel01	Novelgene1422	lncRNA	2217	4
Novelgene3320_novel01	Novelgene3320	lncRNA	4565	1
Novelgene1716_novel01	Novelgene1716	lncRNA	1657	1
Novelgene1433_novel02	Novelgene1433	lncRNA	642	1
Novelgene1607_novel01	Novelgene1607	lncRNA	3150	1
TnS000982227g03_novel05	TnS000982227g03	lncRNA	222	1
Novelgene2209_novel01	Novelgene2209	lncRNA	3458	3
Novelgene3363_novel01	Novelgene3363	lncRNA	3254	1
Novelgene0221_novel01	Novelgene0221	lncRNA	3645	1
TnS001029199g08_novel01	TnS001029199g08	lncRNA	224	1
Novelgene1917_novel01	Novelgene1917	lncRNA	3841	1
Novelgene0694_novel01	Novelgene0694	lncRNA	493	1
TnS000783257g01_novel03	TnS000783257g01	lncRNA	5888	1
Novelgene3700_novel01	Novelgene3700	lncRNA	552	1
TnS000731583g03_novel05	TnS000731583g03	lncRNA	564	1
TnS000812511g09_novel03	TnS000812511g09	lncRNA	3721	1
Novelgene3024_novel01	Novelgene3024	lncRNA	1895	1
TnS000923915g02_novel05	TnS000923915g02	lncRNA	2537	1
Novelgene3538_novel01	Novelgene3538	lncRNA	1531	3
Novelgene2566_novel02	Novelgene2566	lncRNA	2181	1
TnS000200455g01_novel02	TnS000200455g01	lncRNA	4833	1
TnS000741491g02_novel01	TnS000741491g02	lncRNA	2410	3
TnS000182121g05_novel01	TnS000182121g05	lncRNA	2283	3
Novelgene0599_novel01	Novelgene0599	lncRNA	4671	1
Novelgene1519_novel01	Novelgene1519	lncRNA	1420	1
Novelgene2333_novel01	Novelgene2333	lncRNA	1619	1
TnS000138771g01_novel02	TnS000138771g01	lncRNA	2680	1
TnS000001849g01_novel04	TnS000001849g01	lncRNA	4137	3
Novelgene0521_novel01	Novelgene0521	lncRNA	2807	2
Novelgene3002_novel01	Novelgene3002	lncRNA	2229	2
TnS000823801g03_novel01	TnS000823801g03	lncRNA	1917	2
TnS000688411g06_novel03	TnS000688411g06	lncRNA	380	2
Novelgene0963_novel01	Novelgene0963	lncRNA	2731	2
Novelgene1037_novel01	Novelgene1037	lncRNA	2438	1
Novelgene3652_novel01	Novelgene3652	lncRNA	1618	2
Novelgene3927_novel02	Novelgene3927	lncRNA	3009	2
Novelgene0450_novel09	Novelgene0450	lncRNA	2098	6
Novelgene3123_novel01	Novelgene3123	lncRNA	1674	1
TnS000220241g01_novel04	TnS000220241g01	lncRNA	2485	1
Novelgene2701_novel02	Novelgene2701	lncRNA	4262	1
TnS000199233g01_novel04	TnS000199233g01	lncRNA	732	3
Novelgene1492_novel01	Novelgene1492	lncRNA	4189	1
TnS000958977g03_novel03	TnS000958977g03	lncRNA	4941	1
Novelgene0621_novel01	Novelgene0621	lncRNA	3097	1
Novelgene1105_novel01	Novelgene1105	lncRNA	2221	2
Novelgene1558_novel01	Novelgene1558	lncRNA	2538	1
Novelgene0267_novel01	Novelgene0267	lncRNA	4025	1
Novelgene0450_novel01	Novelgene0450	lncRNA	1989	8
TnS000628203g17_novel04	TnS000628203g17	lncRNA	993	1
Novelgene0086_novel01	Novelgene0086	lncRNA	2075	1
Novelgene0841_novel01	Novelgene0841	lncRNA	2968	1
Novelgene1156_novel01	Novelgene1156	lncRNA	488	1
TnS000979179g01_novel05	TnS000979179g01	lncRNA	4548	1
Novelgene2410_novel01	Novelgene2410	lncRNA	3042	1
Novelgene1140_novel03	Novelgene1140	lncRNA	2667	2
TnS000800343g03_novel02	TnS000800343g03	lncRNA	2201	1
Novelgene1660_novel03	Novelgene1660	lncRNA	4806	1
Novelgene2649_novel01	Novelgene2649	lncRNA	1793	1
TnS000709213g01_novel05	TnS000709213g01	lncRNA	1790	1
Novelgene2829_novel02	Novelgene2829	lncRNA	4043	1
Novelgene3086_novel01	Novelgene3086	lncRNA	2897	1
Novelgene0468_novel01	Novelgene0468	lncRNA	1830	1
Novelgene0844_novel01	Novelgene0844	lncRNA	1898	1
TnS000948669g01_novel01	TnS000948669g01	lncRNA	1388	2
Novelgene3473_novel01	Novelgene3473	lncRNA	3147	1
Novelgene2581_novel01	Novelgene2581	lncRNA	2493	1
TnS000821327g05_novel05	TnS000821327g05	lncRNA	3449	1
Novelgene0310_novel01	Novelgene0310	lncRNA	2315	1
Novelgene2528_novel01	Novelgene2528	lncRNA	3125	1
Novelgene2462_novel01	Novelgene2462	lncRNA	4994	1
Novelgene1842_novel01	Novelgene1842	lncRNA	2826	1
TnS000044317g01_novel01	TnS000044317g01	lncRNA	6806	1
Novelgene1226_novel01	Novelgene1226	lncRNA	4643	2
TnS000129707g01_novel03	TnS000129707g01	lncRNA	1357	1
Novelgene0382_novel01	Novelgene0382	lncRNA	4908	1
Novelgene2193_novel01	Novelgene2193	lncRNA	4036	1
Novelgene2117_novel01	Novelgene2117	lncRNA	2913	1
TnS000729703g13_novel02	TnS000729703g13	lncRNA	3801	1
Novelgene3392_novel01	Novelgene3392	lncRNA	2346	2
TnS000680989g05_novel09	TnS000680989g05	lncRNA	1745	1
Novelgene1036_novel01	Novelgene1036	lncRNA	6102	1
Novelgene1505_novel02	Novelgene1505	lncRNA	2240	1
TnS000534937g02_novel06	TnS000534937g02	lncRNA	4721	1
Novelgene1053_novel02	Novelgene1053	lncRNA	3118	1
Novelgene0458_novel02	Novelgene0458	lncRNA	2336	1
Novelgene2805_novel01	Novelgene2805	lncRNA	377	1
Novelgene1542_novel01	Novelgene1542	lncRNA	2043	3
TnS001008671g02_novel04	TnS001008671g02	lncRNA	3071	1
TnS001039363g10_novel05	TnS001039363g10	lncRNA	1662	1
TnS000397783g12_novel01	TnS000397783g12	lncRNA	222	1
TnS000716791g03_novel03	TnS000716791g03	lncRNA	5010	1
TnS000245781g01_novel02	TnS000245781g01	lncRNA	245	1
Novelgene3465_novel02	Novelgene3465	lncRNA	4451	1
Novelgene2552_novel01	Novelgene2552	lncRNA	3098	1
Novelgene0406_novel01	Novelgene0406	lncRNA	4217	1
Novelgene0600_novel01	Novelgene0600	lncRNA	2014	1
Novelgene0483_novel01	Novelgene0483	lncRNA	4992	1
TnS000971859g03_novel04	TnS000971859g03	lncRNA	230	1
TnS000009225g02_novel07	TnS000009225g02	lncRNA	317	1
TnS000731583g06_novel13	TnS000731583g06	lncRNA	4283	1
Novelgene0765_novel01	Novelgene0765	lncRNA	1239	1
TnS000833929g03_novel02	TnS000833929g03	lncRNA	2586	1
TnS000258283g03_novel02	TnS000258283g03	lncRNA	1940	1
Novelgene2395_novel01	Novelgene2395	lncRNA	3985	1
TnS000022753g10_novel03	TnS000022753g10	lncRNA	4776	2
Novelgene1650_novel01	Novelgene1650	lncRNA	240	1
Novelgene2390_novel01	Novelgene2390	lncRNA	1257	2
Novelgene3170_novel01	Novelgene3170	lncRNA	3492	1
TnS000318101g06_novel02	TnS000318101g06	lncRNA	2284	1
Novelgene3421_novel01	Novelgene3421	lncRNA	2039	1
Novelgene1140_novel01	Novelgene1140	lncRNA	2638	1
Novelgene1845_novel01	Novelgene1845	lncRNA	3483	1
TnS000109587g01_novel09	TnS000109587g01	lncRNA	1805	2
Novelgene2967_novel01	Novelgene2967	lncRNA	3700	4
TnS000177641g01_novel02	TnS000177641g01	lncRNA	986	1
TnS001042661g02_novel02	TnS001042661g02	lncRNA	3482	2
TnS000219547g09_novel04	TnS000219547g09	lncRNA	4566	2
Novelgene1028_novel01	Novelgene1028	lncRNA	3271	2
Novelgene1489_novel01	Novelgene1489	lncRNA	5668	1
TnS000875707g04_novel03	TnS000875707g04	lncRNA	413	1
TnS000612387g04_novel01	TnS000612387g04	lncRNA	3708	2
TnS000308751g01_novel01	TnS000308751g01	lncRNA	280	1
Novelgene2281_novel01	Novelgene2281	lncRNA	4635	1
TnS000801895g02_novel03	TnS000801895g02	lncRNA	1730	1
Novelgene1664_novel01	Novelgene1664	lncRNA	3973	1
TnS000686697g01_novel11	TnS000686697g01	lncRNA	1409	2
TnS000631917g08_novel04	TnS000631917g08	lncRNA	2789	2
TnS000041023g02_novel04	TnS000041023g02	lncRNA	2547	1
Novelgene2419_novel01	Novelgene2419	lncRNA	1235	1
Novelgene0072_novel01	Novelgene0072	lncRNA	1646	1
TnS001029693g01_novel06	TnS001029693g01	lncRNA	2297	1
Novelgene0594_novel02	Novelgene0594	lncRNA	799	1
Novelgene1782_novel01	Novelgene1782	lncRNA	4676	1
Novelgene2000_novel01	Novelgene2000	lncRNA	2275	1
Novelgene3499_novel01	Novelgene3499	lncRNA	1684	1
TnS000122145g10_novel02	TnS000122145g10	lncRNA	2563	1
Novelgene2953_novel01	Novelgene2953	lncRNA	2218	1
Novelgene0337_novel01	Novelgene0337	lncRNA	301	1
TnS000122145g07_novel05	TnS000122145g07	lncRNA	2725	2
TnS000894581g10_novel02	TnS000894581g10	lncRNA	4102	3
TnS000968175g02_novel02	TnS000968175g02	lncRNA	4337	1
TnS000226557g04_novel06	TnS000226557g04	lncRNA	2645	1
Novelgene0496_novel01	Novelgene0496	lncRNA	1776	1
Novelgene3360_novel01	Novelgene3360	lncRNA	2453	1
TnS000795579g02_novel04	TnS000795579g02	lncRNA	1757	4
TnS001032271g13_novel01	TnS001032271g13	lncRNA	1627	2
TnS000044525g03_novel01	TnS000044525g03	lncRNA	209	1
Novelgene0487_novel01	Novelgene0487	lncRNA	2281	1
TnS000926507g05_novel01	TnS000926507g05	lncRNA	1959	4
Novelgene3107_novel01	Novelgene3107	lncRNA	5036	1
Novelgene3914_novel01	Novelgene3914	lncRNA	3149	4
Novelgene0301_novel03	Novelgene0301	lncRNA	2973	1
Novelgene0183_novel01	Novelgene0183	lncRNA	2556	1
Novelgene1910_novel01	Novelgene1910	lncRNA	507	2
Novelgene2718_novel01	Novelgene2718	lncRNA	2715	3
Novelgene3179_novel01	Novelgene3179	lncRNA	2277	2
TnS000677859g01_novel14	TnS000677859g01	lncRNA	2216	1
Novelgene1140_novel02	Novelgene1140	lncRNA	1734	1
Novelgene2650_novel01	Novelgene2650	lncRNA	1726	1
TnS001025491g01_novel08	TnS001025491g01	lncRNA	2889	1
Novelgene0703_novel01	Novelgene0703	lncRNA	1073	2
TnS000394139g02_novel10	TnS000394139g02	lncRNA	1713	1
Novelgene2185_novel01	Novelgene2185	lncRNA	1306	1
Novelgene3487_novel01	Novelgene3487	lncRNA	4398	1
Novelgene0274_novel01	Novelgene0274	lncRNA	2780	1
TnS000332527g01_novel03	TnS000332527g01	lncRNA	333	1
Novelgene2788_novel01	Novelgene2788	lncRNA	2562	1
Novelgene0441_novel01	Novelgene0441	lncRNA	5178	1
TnS000693017g02_novel10	TnS000693017g02	lncRNA	2186	1
TnS000829747g03_novel01	TnS000829747g03	lncRNA	300	1
Novelgene1274_novel01	Novelgene1274	lncRNA	1723	1
Novelgene3072_novel01	Novelgene3072	lncRNA	1910	1
TnS000027907g04_novel01	TnS000027907g04	lncRNA	3167	2
TnS000841501g02_novel05	TnS000841501g02	lncRNA	2513	1
Novelgene1029_novel01	Novelgene1029	lncRNA	4405	1
Novelgene2529_novel01	Novelgene2529	lncRNA	3055	1
TnS000382299g03_novel04	TnS000382299g03	lncRNA	5145	2
Novelgene2178_novel01	Novelgene2178	lncRNA	2921	1
TnS000321571g06_novel07	TnS000321571g06	lncRNA	2346	1
Novelgene0460_novel02	Novelgene0460	lncRNA	3623	1
TnS001039731g03_novel05	TnS001039731g03	lncRNA	745	1
TnS000677859g01_novel10	TnS000677859g01	lncRNA	4395	1
Novelgene1053_novel03	Novelgene1053	lncRNA	6055	2
Novelgene1342_novel01	Novelgene1342	lncRNA	2404	1
TnS000780955g02_novel04	TnS000780955g02	lncRNA	2986	2
Novelgene2416_novel01	Novelgene2416	lncRNA	347	1
TnS001029887g10_novel02	TnS001029887g10	lncRNA	1991	1
Novelgene3321_novel01	Novelgene3321	lncRNA	977	1
Novelgene0368_novel01	Novelgene0368	lncRNA	2108	1
Novelgene1193_novel01	Novelgene1193	lncRNA	2616	2
TnS000715591g03_novel02	TnS000715591g03	lncRNA	1768	3
Novelgene0346_novel01	Novelgene0346	lncRNA	4148	2
TnS000522937g01_novel03	TnS000522937g01	lncRNA	1891	2
Novelgene3059_novel02	Novelgene3059	lncRNA	3301	1
TnS000905799g07_novel05	TnS000905799g07	lncRNA	254	1
TnS000688543g01_novel04	TnS000688543g01	lncRNA	337	1
TnS000645087g03_novel03	TnS000645087g03	lncRNA	397	1
Novelgene3378_novel01	Novelgene3378	lncRNA	1783	3
Novelgene0724_novel02	Novelgene0724	lncRNA	3288	1
TnS000728889g01_novel06	TnS000728889g01	lncRNA	2232	1
TnS000770977g01_novel11	TnS000770977g01	lncRNA	3777	1
TnS000370427g13_novel13	TnS000370427g13	lncRNA	2483	1
Novelgene0774_novel01	Novelgene0774	lncRNA	2986	1
TnS000912571g09_novel02	TnS000912571g09	lncRNA	2800	1
TnS000822177g05_novel06	TnS000822177g05	lncRNA	1976	1
TnS000574413g04_novel05	TnS000574413g04	lncRNA	650	1
TnS000741213g01_novel05	TnS000741213g01	lncRNA	2059	1
Novelgene3491_novel01	Novelgene3491	lncRNA	4409	1
Novelgene1340_novel01	Novelgene1340	lncRNA	4974	1
Novelgene0887_novel01	Novelgene0887	lncRNA	1119	1
Novelgene1921_novel01	Novelgene1921	lncRNA	2848	1
Novelgene0683_novel01	Novelgene0683	lncRNA	2441	1
Novelgene3134_novel01	Novelgene3134	lncRNA	2761	1
Novelgene0980_novel01	Novelgene0980	lncRNA	1356	1
TnS000839783g03_novel06	TnS000839783g03	lncRNA	2927	1
Novelgene3581_novel02	Novelgene3581	lncRNA	349	1
Novelgene0602_novel01	Novelgene0602	lncRNA	2262	1
TnS000945599g01_novel07	TnS000945599g01	lncRNA	2733	1
TnS000445133g01_novel02	TnS000445133g01	lncRNA	2505	2
Novelgene1996_novel01	Novelgene1996	lncRNA	2223	1
TnS000895649g01_novel03	TnS000895649g01	lncRNA	213	1
Novelgene1215_novel01	Novelgene1215	lncRNA	496	1
Novelgene2339_novel01	Novelgene2339	lncRNA	2181	1
Novelgene0526_novel01	Novelgene0526	lncRNA	4827	1
Novelgene0201_novel01	Novelgene0201	lncRNA	4419	1
Novelgene1012_novel01	Novelgene1012	lncRNA	3487	1
Novelgene2855_novel01	Novelgene2855	lncRNA	5283	1
Novelgene2328_novel01	Novelgene2328	lncRNA	1149	1
Novelgene1225_novel01	Novelgene1225	lncRNA	3526	1
TnS000480571g06_novel01	TnS000480571g06	lncRNA	4466	1
TnS001002831g06_novel02	TnS001002831g06	lncRNA	4015	1
Novelgene1372_novel01	Novelgene1372	lncRNA	3071	1
TnS001002963g01_novel05	TnS001002963g01	lncRNA	3915	1
Novelgene3511_novel01	Novelgene3511	lncRNA	4017	1
Novelgene0427_novel02	Novelgene0427	lncRNA	3275	1
TnS000233461g02_novel07	TnS000233461g02	lncRNA	5576	1
TnS000674141g21_novel03	TnS000674141g21	lncRNA	230	1
Novelgene2042_novel01	Novelgene2042	lncRNA	681	1
TnS000427783g03_novel05	TnS000427783g03	lncRNA	504	1
TnS000025493g01_novel02	TnS000025493g01	lncRNA	4135	1
TnS000824617g01_novel05	TnS000824617g01	lncRNA	3312	3
Novelgene3271_novel03	Novelgene3271	lncRNA	5339	1
TnS000667625g06_novel01	TnS000667625g06	lncRNA	4779	1
TnS000597069g02_novel01	TnS000597069g02	lncRNA	2009	1
TnS000588755g02_novel04	TnS000588755g02	lncRNA	1310	1
Novelgene2218_novel01	Novelgene2218	lncRNA	2498	1
Novelgene2960_novel02	Novelgene2960	lncRNA	687	1
TnS000355969g01_novel02	TnS000355969g01	lncRNA	3481	1
TnS000723435g06_novel11	TnS000723435g06	lncRNA	3164	1
Novelgene3354_novel01	Novelgene3354	lncRNA	2636	1
Novelgene0829_novel02	Novelgene0829	lncRNA	2958	1
TnS000027907g04_novel05	TnS000027907g04	lncRNA	4809	1
TnS000156881g03_novel03	TnS000156881g03	lncRNA	299	1
TnS000146041g08_novel04	TnS000146041g08	lncRNA	1036	1
TnS000945599g01_novel06	TnS000945599g01	lncRNA	5561	1
Novelgene0738_novel05	Novelgene0738	lncRNA	3380	2
TnS000583159g03_novel10	TnS000583159g03	lncRNA	3309	1
Novelgene1732_novel01	Novelgene1732	lncRNA	2696	1
Novelgene3305_novel01	Novelgene3305	lncRNA	3736	1
Novelgene3638_novel01	Novelgene3638	lncRNA	1179	1
TnS001032845g07_novel14	TnS001032845g07	lncRNA	307	1
Novelgene2487_novel01	Novelgene2487	lncRNA	3289	1
TnS000145195g06_novel03	TnS000145195g06	lncRNA	2245	1
TnS000208343g02_novel05	TnS000208343g02	lncRNA	5537	1
TnS000125481g01_novel01	TnS000125481g01	lncRNA	3856	1
TnS001042629t01	TnS001042629g01	lncRNA	787	4
TnS000864597g01_novel05	TnS000864597g01	lncRNA	4343	2
TnS000382299g03_novel02	TnS000382299g03	lncRNA	6173	1
Novelgene1053_novel01	Novelgene1053	lncRNA	6311	1
Novelgene2007_novel01	Novelgene2007	lncRNA	2703	1
Novelgene1137_novel02	Novelgene1137	lncRNA	928	1
TnS000219547g03_novel01	TnS000219547g03	lncRNA	2228	1
TnS000171755g05_novel09	TnS000171755g05	lncRNA	3546	1
Novelgene2486_novel02	Novelgene2486	lncRNA	2328	1
TnS000382299g04_novel04	TnS000382299g04	lncRNA	3727	2
Novelgene3276_novel01	Novelgene3276	lncRNA	2264	1
TnS000865723t06	TnS000865723g06	lncRNA	882	1
Novelgene2960_novel06	Novelgene2960	lncRNA	2007	2
Novelgene3012_novel01	Novelgene3012	lncRNA	3924	1
Novelgene0250_novel01	Novelgene0250	lncRNA	2342	1
Novelgene1020_novel01	Novelgene1020	lncRNA	822	1
Novelgene1511_novel01	Novelgene1511	lncRNA	2334	1
Novelgene1453_novel01	Novelgene1453	lncRNA	840	1
Novelgene0914_novel01	Novelgene0914	lncRNA	3102	1
Novelgene2989_novel01	Novelgene2989	lncRNA	2817	1
TnS000131745g01_novel01	TnS000131745g01	lncRNA	5823	2
Novelgene0691_novel01	Novelgene0691	lncRNA	4407	1
TnS000486845g02_novel02	TnS000486845g02	lncRNA	422	1
Novelgene1134_novel01	Novelgene1134	lncRNA	2907	1
Novelgene1446_novel01	Novelgene1446	lncRNA	2025	1
Novelgene1430_novel01	Novelgene1430	lncRNA	2327	1
TnS000533251g01_novel03	TnS000533251g01	lncRNA	2697	5
Novelgene2037_novel03	Novelgene2037	lncRNA	1851	1
TnS000892817g03_novel01	TnS000892817g03	lncRNA	1110	1
TnS000107601g05_novel05	TnS000107601g05	lncRNA	2523	1
Novelgene2619_novel01	Novelgene2619	lncRNA	1825	1
TnS000790519g08_novel05	TnS000790519g08	lncRNA	5522	2
Novelgene0799_novel01	Novelgene0799	lncRNA	4626	1
Novelgene3953_novel01	Novelgene3953	lncRNA	4943	2
Novelgene3521_novel01	Novelgene3521	lncRNA	2660	3
Novelgene1550_novel01	Novelgene1550	lncRNA	2919	1
TnS000412953g01_novel05	TnS000412953g01	lncRNA	2260	1
TnS000920017g01_novel01	TnS000920017g01	lncRNA	3947	1
TnS000233461g02_novel06	TnS000233461g02	lncRNA	7557	2
TnS000279713g01_novel03	TnS000279713g01	lncRNA	2339	1
Novelgene1907_novel01	Novelgene1907	lncRNA	3966	1
TnS000208183g01_novel03	TnS000208183g01	lncRNA	2380	1
Novelgene2220_novel01	Novelgene2220	lncRNA	1800	1
Novelgene1495_novel02	Novelgene1495	lncRNA	1678	1
TnS001013105g04_novel01	TnS001013105g04	lncRNA	3624	1
Novelgene0084_novel01	Novelgene0084	lncRNA	5567	1
Novelgene1916_novel01	Novelgene1916	lncRNA	2641	1
Novelgene1273_novel01	Novelgene1273	lncRNA	2280	1
TnS000779103g01_novel01	TnS000779103g01	lncRNA	2841	1
TnS000219547g09_novel05	TnS000219547g09	lncRNA	2216	3
TnS000826455g04_novel03	TnS000826455g04	lncRNA	3511	2
Novelgene0553_novel01	Novelgene0553	lncRNA	4179	1
TnS000895935g04_novel04	TnS000895935g04	lncRNA	2703	1
Novelgene3066_novel01	Novelgene3066	lncRNA	1043	1
Novelgene0225_novel02	Novelgene0225	lncRNA	2182	1
Novelgene1226_novel03	Novelgene1226	lncRNA	2326	1
TnS000899581g01_novel05	TnS000899581g01	lncRNA	3332	1
TnS000809851g13_novel02	TnS000809851g13	lncRNA	1209	1
TnS000134919g02_novel01	TnS000134919g02	lncRNA	3307	3
Novelgene0998_novel01	Novelgene0998	lncRNA	3825	1
Novelgene2118_novel01	Novelgene2118	lncRNA	2913	1
Novelgene1864_novel01	Novelgene1864	lncRNA	3887	1
TnS000041023g02_novel05	TnS000041023g02	lncRNA	2906	1
Novelgene1789_novel01	Novelgene1789	lncRNA	1925	1
Novelgene1418_novel01	Novelgene1418	lncRNA	1433	1
TnS000265641g02_novel03	TnS000265641g02	lncRNA	4534	1
TnS001024159g03_novel02	TnS001024159g03	lncRNA	3822	1
TnS000931667g01_novel01	TnS000931667g01	lncRNA	508	1
TnS000401307g05_novel02	TnS000401307g05	lncRNA	6604	1
Novelgene0647_novel02	Novelgene0647	lncRNA	1066	1
Novelgene3897_novel03	Novelgene3897	lncRNA	2650	3
TnS000308751g10_novel06	TnS000308751g10	lncRNA	2070	1
Novelgene2999_novel01	Novelgene2999	lncRNA	1704	1
Novelgene3020_novel01	Novelgene3020	lncRNA	1905	1
TnS000164789g03_novel01	TnS000164789g03	lncRNA	3562	3
Novelgene1095_novel01	Novelgene1095	lncRNA	4237	1
Novelgene2200_novel01	Novelgene2200	lncRNA	1665	1
Novelgene3560_novel04	Novelgene3560	lncRNA	330	1
Novelgene0177_novel02	Novelgene0177	lncRNA	1643	1
Novelgene3332_novel01	Novelgene3332	lncRNA	2439	1
TnS000194003g01_novel11	TnS000194003g01	lncRNA	241	1
TnS000180655g03_novel01	TnS000180655g03	lncRNA	1757	1
TnS000680989g05_novel10	TnS000680989g05	lncRNA	3645	2
TnS000812511g09_novel09	TnS000812511g09	lncRNA	2749	1
TnS000264111g04_novel01	TnS000264111g04	lncRNA	2564	1
Novelgene1041_novel01	Novelgene1041	lncRNA	2907	1
TnS000497509g03_novel03	TnS000497509g03	lncRNA	4899	1
TnS000530825g01_novel01	TnS000530825g01	lncRNA	4059	2
TnS000203073g10_novel01	TnS000203073g10	lncRNA	3889	1
TnS000952117t01	TnS000952117g01	lncRNA	823	4
TnS000939259g03_novel02	TnS000939259g03	lncRNA	1678	1
TnS000934095g04_novel03	TnS000934095g04	lncRNA	2997	3
Novelgene2617_novel02	Novelgene2617	lncRNA	5164	1
Novelgene2257_novel01	Novelgene2257	lncRNA	3436	1
Novelgene3596_novel01	Novelgene3596	lncRNA	2518	1
Novelgene1329_novel01	Novelgene1329	lncRNA	2505	1
Novelgene2187_novel01	Novelgene2187	lncRNA	2202	1
Novelgene2327_novel01	Novelgene2327	lncRNA	4838	1
Novelgene2337_novel01	Novelgene2337	lncRNA	3164	1
Novelgene3344_novel01	Novelgene3344	lncRNA	1800	1
TnS000591365g18_novel02	TnS000591365g18	lncRNA	2332	1
Novelgene3493_novel02	Novelgene3493	lncRNA	2390	1
Novelgene1740_novel02	Novelgene1740	lncRNA	1653	1
Novelgene0577_novel04	Novelgene0577	lncRNA	713	1
Novelgene3905_novel01	Novelgene3905	lncRNA	404	1
TnS000205277g01_novel06	TnS000205277g01	lncRNA	1851	1
Novelgene0838_novel01	Novelgene0838	lncRNA	3560	1
Novelgene1672_novel01	Novelgene1672	lncRNA	4406	1
TnS000990499g03_novel04	TnS000990499g03	lncRNA	2880	2
TnS000833535g02_novel03	TnS000833535g02	lncRNA	3559	3
TnS000817819g02_novel01	TnS000817819g02	lncRNA	3835	1
TnS000895935g04_novel03	TnS000895935g04	lncRNA	2236	2
TnS000867017g31_novel09	TnS000867017g31	lncRNA	2320	1
TnS000934095g04_novel13	TnS000934095g04	lncRNA	2873	1
TnS000401307g05_novel05	TnS000401307g05	lncRNA	4695	1
Novelgene1432_novel01	Novelgene1432	lncRNA	2623	1
TnS000580017g02_novel02	TnS000580017g02	lncRNA	1152	1
Novelgene2858_novel01	Novelgene2858	lncRNA	2557	2
Novelgene2573_novel01	Novelgene2573	lncRNA	1661	1
Novelgene1588_novel01	Novelgene1588	lncRNA	1095	1
Novelgene3516_novel01	Novelgene3516	lncRNA	2545	1
TnS000980157g01_novel05	TnS000980157g01	lncRNA	2010	2
TnS000461511g08_novel01	TnS000461511g08	lncRNA	4494	1
TnS000776579g05_novel03	TnS000776579g05	lncRNA	2280	1
TnS000798485g01_novel24	TnS000798485g01	lncRNA	1999	3
Novelgene0460_novel01	Novelgene0460	lncRNA	6680	2
Novelgene2060_novel01	Novelgene2060	lncRNA	3258	2
TnS000998553g09_novel01	TnS000998553g09	lncRNA	1549	2
Novelgene0211_novel01	Novelgene0211	lncRNA	2229	1
Novelgene0993_novel01	Novelgene0993	lncRNA	2859	1
TnS000553317g01_novel03	TnS000553317g01	lncRNA	224	1
Novelgene1036_novel03	Novelgene1036	lncRNA	2989	2
