# Supplementary material for: Single-Molecule Long-Read Sequencing Reveals the Diversity of Full-Length Transcripts in Leaves of Gnetum (Gnetales)
Source: Int J Mol Sci. 2019 Dec 17;20(24):6350. doi: 10.3390/ijms20246350 (PMC6941099; doi:10.3390/ijms20246350)
Supplement: Supplementary file 1 [file ijms-20-06350-s001.zip › File S3. Results of poly(A) prediction.xls]

## Sheet: Summary of APA
GeneID	Strand	Aligned reads	Num sites	Locations
TnS000984489g05	-	9	2	461418;461438
TnS000903115g01	-	4	1	120226
TnS000942155g01	-	5	1	25199
TnS000251821g11	-	2	1	984504
TnS000692159g22	-	15	4	2645413;2645483;2645539;2645570
TnS000948767g02	+	9	1	80125
TnS000115783g01	+	16	3	61810;57547;57895
TnS000785237g02	+	8	2	147255;147312
TnS001037561g01	+	23	2	90811;90901
TnS000471885g02	+	3	1	117805
TnS000587381g01	-	3	1	155730
TnS000653177g01	-	14	1	654162
TnS000548585g11	-	4	2	437685;437650
TnS000199425g09	+	20	2	714797;715012
TnS000214043g05	-	5	1	475078
TnS000134777g06	+	5	1	851367
TnS000860879g01	+	22	2	42975;42841
TnS000879045g08	-	18	1	406808
TnS000138315g02	-	13	2	266823;266899
TnS000156791g01	+	6	1	19151
TnS000414293g04	-	18	3	280453;280390;280740
TnS000361895g02	+	13	2	362520;365914
TnS000261797g16	+	6	1	1103579
TnS000412825g06	+	2	1	933666
TnS000718023g01	+	49	4	19097;19054;19012;19169
TnS000404217g02	+	4	1	91211
TnS000903297g06	-	100	7	801359;801209;801281;801405;801425;801445;801234
TnS000104175g03	+	14	4	194433;195492;197484;194652
TnS000913013g04	-	4	1	643093
TnS001034791g07	-	4	1	458600
TnS000872397g06	+	27	4	601021;600927;600973;600619
TnS000441621g14	-	6	2	865677;865711
TnS000968175g03	+	4	2	118651;118699
TnS000949469g05	+	3	1	584874
TnS000503167g02	+	11	4	198921;198972;198899;198992
TnS000830477g01	+	19	4	100472;100353;100382;100429
TnS000540733g01	+	3	1	76733
TnS000137343g11	-	29	6	512192;511453;511322;511432;511964;512300
TnS000881279g13	+	4	1	1014267
TnS000646101g01	-	5	1	8375
TnS000265641g01	-	3	1	37983
TnS000171641g04	+	9	2	202512;202593
TnS000714517g01	+	19	4	55033;55375;55211;55239
TnS000553067g03	+	7	2	173193;173140
TnS000387089g05	-	5	1	191604
TnS000017639g01	+	7	1	10644
TnS000669031g02	+	5	1	621840
TnS000544263g20	-	5	1	1642459
TnS000918611g01	+	8	1	106202
TnS000893919g03	+	7	2	278899;315601
TnS000400187g09	+	30	4	1129885;1129861;1124252;1129915
TnS000198091g06	+	23	3	638060;638154;637649
TnS000237087g03	-	122	6	123295;123159;123233;123321;123358;123532
TnS000217467g02	-	12	1	55963
TnS000972757g01	-	8	3	62737;62851;62906
TnS000076443g04	-	13	3	227809;227571;227999
TnS001013105g01	+	4	1	255689
TnS000547167g05	-	9	3	747053;747136;747408
TnS000734207g06	-	20	5	861571;861767;861590;861610;861680
TnS000983499g08	+	6	1	889212
TnS000322161g03	+	13	2	183833;166705
TnS000752563g05	+	9	2	380154;380345
TnS000589683g09	-	7	1	1379951
TnS000200641g02	-	4	1	164044
TnS000461511g06	+	5	2	545414;545524
TnS000238395g01	+	25	3	270478;270428;270342
TnS000920983g03	+	6	1	140309
TnS001015855g03	-	5	1	35497
TnS000743821g07	-	3	1	236867
TnS000892793g03	-	8	1	140485
TnS000674141g31	+	7	1	2897604
TnS000867017g23	-	5	1	2605300
TnS000088861g01	+	3	1	195909
TnS000867565g02	+	30	5	75683;75437;75547;75629;75741
TnS000279713g06	-	5	1	424713
TnS000245781g02	-	3	1	327120
TnS000720319g02	-	4	1	14405
TnS000743059g09	+	7	1	567674
TnS000674141g08	-	3	1	1294097
TnS000011433g04	-	5	1	338651
TnS000042605g03	-	30	2	593642;593708
TnS000555711g05	-	8	1	425514
TnS000958809g05	+	10	1	580592
TnS000401131g07	-	5	1	385085
TnS001042873g06	+	5	1	542566
TnS000201225g05	-	8	3	217418;217548;217308
TnS000110621g02	+	4	1	144901
TnS000468173g05	+	9	2	494891;494853
TnS000770087g01	+	6	2	27822;28574
TnS000487277g09	+	4	1	784471
TnS001021927g08	+	2	1	587348
TnS000716791g05	-	10	3	1381672;1381847;1381695
TnS000868489g06	+	4	1	447720
TnS000821265g07	+	9	1	1408837
TnS000461511g11	-	11	1	975082
TnS000142969g10	-	2	1	854192
TnS000173473g04	-	7	2	205252;205461
TnS000816741g01	-	12	2	136342;136382
TnS000621603g01	+	3	1	83057
TnS000155763g02	-	23	3	61809;61916;62035
TnS000795913g02	+	5	1	350951
TnS000198223g07	+	35	3	417854;417800;418254
TnS000032089g05	+	65	4	392986;393116;393146;392863
TnS000385199g01	-	13	3	255901;274370;255947
TnS000510797g01	+	24	3	175016;174901;174964
TnS000357211g03	-	6	1	322445
TnS000460789g08	+	9	2	432118;432152
TnS000599845g01	+	7	2	80681;80899
TnS000498063g74	+	7	3	6642292;6642253;6642602
TnS000995843g01	-	85	4	87863;88021;87884;87965
TnS000866901g01	-	10	2	19528;19455
TnS000970673g01	-	82	2	2753;2648
TnS000266583g10	-	19	3	1203379;1203434;1203326
TnS000862679g01	+	7	2	7299;7369
TnS000654917g05	+	3	1	391204
TnS000098761g14	-	5	1	827251
TnS000428321g03	+	16	3	570374;570208;570319
TnS000008893g01	+	10	2	168163;110446
TnS000076323g04	-	10	2	764467;749544
TnS000105903g10	-	23	2	799401;799546
TnS001028123g03	-	5	1	254261
TnS000452573g07	+	39	2	1023555;1023608
TnS000385947g02	-	10	2	208471;208518
TnS000150445g02	+	5	1	192175
TnS000366987g03	+	21	3	285755;281558;285824
TnS000252867g02	-	6	1	49556
TnS000803219g02	-	26	2	73603;73666
TnS000136259g01	+	5	1	17196
TnS000586029g01	+	2	1	6769
TnS000486009g02	-	13	2	46371;46399
TnS000207311g02	+	29	4	23684;23779;23819;23845
TnS000830595g02	+	78	5	60792;60614;60713;60746;60913
TnS000839783g03	+	15	4	138141;178632;161516;178485
TnS001039185g01	+	3	1	136571
TnS000892475g01	+	6	2	10408;10318
TnS000597069g03	+	221	4	366668;366646;366755;366506
TnS000377897g08	+	3	1	460384
TnS000594241g07	+	3	1	522830
TnS000124707g01	+	3	1	36548
TnS000001255g01	+	3	1	96024
TnS000826901g01	-	16	2	47752;47872
TnS000357043g03	-	3	1	257966
TnS000389811g02	-	11	1	198919
TnS000505271g02	-	5	1	260462
TnS000079231g02	-	23	2	284348;284386
TnS000533047g01	+	6	1	13870
TnS000388533g03	+	13	3	355313;355337;355381
TnS000509191g01	-	33	5	12757;12833;12854;12777;12813
TnS000114139g13	+	9	2	2032848;2032908
TnS000842779g04	-	6	1	248272
TnS000963127g02	+	6	1	178903
TnS000858623g01	+	10	1	71597
TnS001023411g01	+	9	2	6898;6740
TnS000824839g16	+	3	1	1479633
TnS000583511g01	+	7	1	24735
TnS000418971g01	+	10	3	39636;16828;50208
TnS000959203g01	+	6	2	70254;88850
TnS000568463g02	+	4	1	314285
TnS000632669g03	+	5	1	1113060
TnS000324749g01	+	11	3	88174;76222;88788
TnS000871943g01	+	4	1	41499
TnS000493429g11	+	11	3	1242377;1242445;1242292
TnS000084833g09	+	22	3	1036430;1036497;1036311
TnS001031169g07	-	21	3	1325096;1325030;1324988
TnS000785057g07	-	10	3	1199709;1199804;1199688
TnS000086967g02	+	5	1	118808
TnS000487577g04	+	11	1	581635
TnS000143621g04	+	3	1	189621
TnS000041425g01	+	14	2	84367;84486
TnS000994153g01	-	13	2	110942;111054
TnS000096033g02	+	4	1	53138
TnS001012745g01	+	3	1	159861
TnS000238919g07	-	6	1	514787
TnS001032845g12	-	13	3	1511270;1511459;1511312
TnS000979943g01	-	65	6	84165;84116;84358;84076;84234;84401
TnS000830595g04	+	5	2	152853;153538
TnS000728721g06	-	2	1	315934
TnS000453267g02	+	20	4	899735;899840;875905;899762
TnS000106601g02	+	16	3	90531;90452;90475
TnS000803113g12	+	5	1	786392
TnS000362213g01	+	4	1	153357
TnS000636587g08	-	82	2	1568376;1568403
TnS000159101g01	+	31	3	10317;10364;10282
TnS000362213g02	-	2	1	287588
TnS000950953g07	-	4	1	261060
TnS000097109g26	-	22	5	2095431;2095196;2095274;2095236;2095145
TnS001043071g04	+	37	3	368998;368928;365722
TnS000377993g01	+	5	1	37551
TnS000782471g01	+	14	3	121063;120891;121028
TnS000681241g05	-	16	1	372790
TnS000479301g08	+	202	5	356077;355998;355851;355950;355903
TnS000226135g08	+	14	3	713438;713459;713672
TnS001013965g10	+	19	4	891131;891399;891243;891297
TnS000340093g04	-	6	1	200802
TnS000574413g05	-	9	2	1138197;1138241
TnS000314283g09	+	5	1	845914
TnS001022817g02	+	14	1	147727
TnS000201967g04	-	3	1	581584
TnS000757933g03	+	11	3	413951;413864;414208
TnS000170799g06	-	6	1	306108
TnS000076667g06	-	3	1	515237
TnS000829583g08	-	5	1	916233
TnS000227381g04	+	3	1	148527
TnS000924699g05	-	11	1	487399
TnS000817183g24	+	4	1	1690380
TnS000110159g04	+	6	1	423090
TnS000084833g07	-	4	1	782121
TnS000310845g04	+	3	1	335904
TnS000057613g16	+	7	1	693588
TnS000680989g05	+	17	3	789708;781671;776102
TnS001014313g01	+	8	2	278442;278538
TnS000812803g05	+	8	1	792500
TnS000301319g07	+	6	1	242852
TnS000283031g05	+	5	1	412341
TnS000692159g07	+	5	2	569681;569662
TnS000650823g01	+	2	1	22891
TnS000815875g01	+	3	1	40968
TnS000215639g05	-	8	1	378739
TnS000389811g01	-	39	5	158144;158080;158111;158175;157888
TnS000271611g04	+	27	4	507618;507712;507676;507773
TnS000035489g02	+	5	1	465859
TnS000841501g02	+	7	1	159897
TnS000943217g02	+	10	3	269562;269747;269841
TnS000103057g11	-	4	1	1904986
TnS000197697g14	+	20	3	1346080;1344327;1365688
TnS000615439g05	-	12	1	166275
TnS000355207g02	-	4	1	407196
TnS000075309g04	-	5	1	304536
TnS000035493g19	+	4	1	1499102
TnS000693233g01	-	5	1	80048
TnS000146501g01	+	7	1	45244
TnS000756241g03	+	5	1	553914
TnS000009469g06	-	11	2	631008;610469
TnS000895889g04	-	9	2	184502;184712
TnS000249451g04	-	33	7	759954;760153;760239;759973;762218;762591;762198
TnS000430341g01	-	7	1	38584
TnS000546439g02	-	8	2	293146;293618
TnS000955355g08	-	20	4	1177729;1177578;1177695;1190688
TnS000380561g01	+	6	1	16388
TnS000097785g01	+	3	1	76153
TnS000062909g01	+	10	2	7158;7243
TnS000861503g07	+	12	1	453359
TnS000047801g08	+	17	1	435664
TnS000162935g06	+	2	1	838375
TnS000036863g02	+	45	5	17127;17149;17197;16988;16945
TnS000075125g01	+	3	1	80875
TnS000323239g03	+	6	2	336735;336668
TnS000107185g03	-	4	1	943780
TnS000150511g01	+	2	1	4889
TnS000354929g05	-	20	3	666554;666429;666573
TnS000449193g04	+	4	1	259246
TnS001029283g06	-	25	1	223322
TnS000822177g06	+	15	2	461884;461829
TnS000888107g09	-	6	2	924813;911483
TnS000979079g05	-	2	1	556285
TnS000932809g02	+	9	2	96072;96092
TnS000576021g04	-	3	1	280646
TnS000999649g02	-	9	1	360052
TnS000648987g02	+	6	1	302871
TnS000782909g02	-	3	1	112046
TnS000931505g02	+	5	1	93063
TnS000434859g01	+	47	6	21999;23302;23325;23402;21883;24186
TnS000591365g20	-	42	3	2339981;2340038;2339958
TnS001036485g02	+	3	1	337424
TnS000139467g01	+	14	1	16124
TnS000453267g04	-	5	2	906869;906902
TnS000194003g01	+	16	2	26139;26041
TnS000915517g03	+	8	2	121111;132657
TnS000839127g03	+	2	1	379219
TnS000008111g03	+	5	1	222910
TnS000867565g04	-	17	2	200795;200627
TnS000486687g01	-	3	1	51943
TnS000986667g01	-	6	2	219047;218720
TnS000161755g05	-	12	2	528777;528713
TnS000409601g02	-	8	1	530365
TnS000115905g03	-	10	1	158587
TnS000078159g02	-	4	1	146426
TnS000174697g02	-	3	1	391210
TnS000998553g12	+	8	2	888170;888072
TnS000135803g02	-	9	1	19946
TnS000711683g01	+	2	1	242924
TnS000661223g01	-	7	1	272510
TnS001007305g02	-	8	2	68370;68443
TnS000062973g03	+	10	2	1441726;1408388
TnS000105903g09	+	9	2	750482;750422
TnS000118363g01	+	7	2	109786;109905
TnS000666215g02	-	42	2	23747;23564
TnS000019527g03	-	25	3	466761;466811;467254
TnS000642933g04	-	12	1	53876
TnS001028169g06	-	23	3	493534;492826;493479
TnS000850087g05	+	14	2	1427605;1427477
TnS000041181g06	-	6	1	388996
TnS000041003g05	-	35	4	444259;444165;444348;444384
TnS000465489g01	-	3	1	1244
TnS000918547g01	-	16	4	14979;15015;15098;15125
TnS000678221g17	+	25	1	1876746
TnS000858491g03	-	13	3	143975;141605;142131
TnS000674141g39	+	17	4	3491113;3488125;3491151;3485335
TnS000131849g01	+	2	1	155340
TnS000009533g01	-	4	1	35643
TnS000827737g06	+	42	4	613221;613056;611359;613183
TnS000122145g07	-	7	1	614285
TnS000284041g01	-	11	3	29545;29570;29675
TnS000552883g10	-	31	2	1494708;1494733
TnS000037287g04	+	4	1	223752
TnS000901477g03	+	4	1	185216
TnS000738653g01	-	4	1	70696
TnS000664257g02	-	12	1	163189
TnS000032623g02	-	2	1	255755
TnS000427783g04	-	5	2	360553;360574
TnS000074117g02	+	6	1	241980
TnS000189967g04	+	4	1	365459
TnS000766067g01	+	7	2	307216;307328
TnS000966305g05	-	3	1	397926
TnS000547167g09	-	6	1	988396
TnS000238919g01	+	10	2	37126;36824
TnS000945599g01	+	9	2	42773;40708
TnS000752563g17	+	25	4	1476640;1476585;1476561;1476610
TnS000356227g06	+	5	1	391149
TnS000168645g02	-	18	4	169907;169814;169607;178132
TnS000045715g03	-	10	3	317346;317023;317279
TnS000959495g01	-	20	4	165427;165532;165457;213023
TnS000541611g04	+	6	2	262351;264723
TnS000096591g02	+	15	3	299171;297243;298593
TnS000124723g14	-	11	2	1112583;1112648
TnS000150461g05	+	21	4	460027;460155;459851;460094
TnS000414293g01	+	5	1	31417
TnS000888527g02	+	2	1	250349
TnS000096033g06	-	4	1	448047
TnS000306961g03	-	13	2	620339;620372
TnS000279713g14	-	13	2	1752883;1752910
TnS000201147g03	-	4	2	210668;218367
TnS000008647g03	-	245	8	124518;124686;124443;124368;124610;124561;123742;124580
TnS000895551g01	+	36	6	113443;80566;113553;45445;72849;103946
TnS000752669g01	+	16	2	60424;60290
TnS000233773g03	-	41	3	230928;230774;230858
TnS000800909g01	+	11	2	117763;117783
TnS000145765g02	-	9	2	200351;200521
TnS000261349g02	-	7	2	134377;134350
TnS000279713g09	-	2	1	759628
TnS000237761g06	-	3	1	485761
TnS000243729g01	-	119	9	35280;34938;35007;35147;35194;34887;34957;35055;35480
TnS000036561g01	+	8	2	74613;74434
TnS000292477g02	-	41	2	464605;464700
TnS000230875g02	-	11	2	417555;417575
TnS000661271g02	-	2	1	160461
TnS000148149g09	-	10	2	467794;467835
TnS001023131g02	+	4	1	387133
TnS000113183g06	+	7	2	677065;676981
TnS000041403g02	-	2	1	73333
TnS000897391g10	+	4	1	776596
TnS000740941g02	+	2	1	480357
TnS000887441g01	+	7	1	110898
TnS000013987g01	+	15	2	197111;197083
TnS000345359g04	-	19	5	326988;327047;326952;327126;348264
TnS000057003g01	+	14	4	21216;21196;20996;21145
TnS000593327g04	+	16	2	459401;462063
TnS000972563g06	-	2	1	543095
TnS000396109g02	+	4	1	101748
TnS000726839g04	+	16	1	277468
TnS000842757g01	-	10	1	56138
TnS000249601g04	-	23	4	350688;350834;350739;350798
TnS000998361g01	-	5	2	195977;196047
TnS000436783g10	-	7	2	423558;423503
TnS000237615g01	+	17	3	94007;93922;93964
TnS000732031g03	+	20	2	295291;295069
TnS000998875g03	-	3	1	58471
TnS000434027g03	+	7	1	171211
TnS000218531g07	-	3	1	1019567
TnS000949469g08	+	15	2	796712;796817
TnS000994443g07	-	13	3	743390;743316;743337
TnS001039353g02	+	3	1	146285
TnS000097109g31	+	2	1	2496676
TnS000809851g06	+	12	2	383792;383701
TnS000226533g02	+	3	1	547084
TnS000167267g02	+	5	1	322411
TnS000208343g02	+	15	3	496276;576900;579680
TnS000037287g09	-	51	5	770203;770316;770346;770369;770488
TnS000161755g04	-	4	1	386502
TnS000608459g03	-	13	1	314557
TnS000572633g02	-	23	3	272922;272951;272974
TnS000875687g02	-	3	1	256107
TnS000894827g01	+	8	3	77019;77251;77119
TnS000182403g06	-	20	3	544465;544373;544484
TnS000060573g07	-	28	4	593202;593317;592669;593295
TnS000120933g01	-	73	3	4545;4580;4822
TnS000370427g13	+	30	5	1149206;1148380;1161646;1155386;1161417
TnS000817339g01	-	8	1	37401
TnS000114139g17	+	3	1	2449561
TnS000122753g03	-	13	3	84107;84234;84083
TnS000974603g08	+	17	1	494772
TnS000007359g06	+	28	4	1127505;1123694;1124507;1127468
TnS000408579g08	-	8	2	275615;275785
TnS000950979g01	+	8	1	72285
TnS000776413g16	+	23	5	1586215;1586269;1586071;1586160;1586132
TnS001029283g03	-	4	1	117746
TnS000098941g01	+	33	2	183715;183669
TnS001032845g07	-	30	4	969662;969881;969614;978188
TnS000958223g02	-	10	1	36199
TnS000940919g02	+	12	2	119780;115060
TnS000704077g03	+	15	3	515543;515452;515512
TnS000823801g02	+	43	5	138883;113349;138655;138848;138714
TnS000489311g01	+	10	2	19999;20087
TnS000841521g02	+	2	1	55296
TnS001029887g02	+	11	4	730993;731058;730924;730957
TnS000036863g03	-	5	1	196066
TnS000500167g03	+	53	5	133264;133142;133167;133206;133070
TnS000014537g06	-	39	5	761863;761806;761905;761932;761973
TnS000877399g13	-	5	2	1486491;1493274
TnS000925207g09	+	5	1	1233908
TnS000104321g01	+	33	5	23762;23634;23571;23840;23901
TnS000875691g03	+	12	3	228563;228633;227655
TnS000976981g01	+	8	2	125211;125095
TnS000390199g03	+	17	3	141086;140932;141047
TnS000097109g19	+	3	1	1440140
TnS000811015g05	-	21	1	567071
TnS000869707g01	-	6	1	439263
TnS000598867g09	-	16	1	425887
TnS000760479g01	+	6	1	117133
TnS000706221g02	-	3	1	201797
TnS000108357g01	-	7	1	15345
TnS000136509g07	-	3	1	231502
TnS000117837g01	-	39	6	2799;2768;2592;2734;2980;2921
TnS000157591g07	+	2	1	528188
TnS001026243g01	+	6	1	36073
TnS000942793g07	+	5	1	659586
TnS000553657g08	-	2	1	1437779
TnS000177943g01	-	24	3	146220;146129;146277
TnS000479359g08	+	11	2	715522;715664
TnS000984855g12	+	12	1	904243
TnS000980175g01	+	18	3	154222;154112;154180
TnS000362467g01	+	6	2	29281;29338
TnS000042743g01	+	3	1	64261
TnS013907688g01	-	2	1	356
TnS000052095g05	+	20	3	996248;996286;995966
TnS000717299g15	-	9	1	1189660
TnS000991505g04	+	3	1	235372
TnS000823801g04	-	5	1	196612
TnS000204899g02	-	5	2	186365;186418
TnS000628475g02	+	14	1	163917
TnS000141025g01	-	12	3	9345;13781;14303
TnS000861201g01	+	15	3	230536;231683;230353
TnS000201295g01	-	40	4	25979;25899;25721;25919
TnS000690335g04	-	4	2	256427;256499
TnS000020685g02	-	8	1	107366
TnS000655603g05	-	5	1	529118
TnS000230667g01	-	13	2	4943;5014
TnS000405903g06	-	3	1	461349
TnS000329869g01	+	6	1	146297
TnS000739813g05	+	16	4	750231;812130;736112;810211
TnS000288615g03	+	6	2	910650;910545
TnS000242443g08	-	23	1	471757
TnS000189069g04	+	4	1	511416
TnS000622211g02	+	7	2	606901;603396
TnS000680827g04	+	16	4	207651;207756;207897;207927
TnS000642091g02	+	12	3	131827;131873;131763
TnS000275493g02	+	23	3	248041;247758;248172
TnS000150193g07	-	13	1	303960
TnS000078691g03	+	22	2	248557;248681
TnS000540733g02	+	6	2	187433;187465
TnS000214873g01	+	203	6	73454;73531;73376;73723;73648;73288
TnS000859431g01	+	4	1	41938
TnS000026091g03	-	20	1	1002336
TnS000423555g01	+	3	1	215879
TnS000288615g01	-	39	2	257880;257906
TnS000005245g02	+	8	2	80057;71651
TnS000323519g04	-	7	1	808034
TnS000674141g28	-	10	1	2712144
TnS000111477g08	+	11	3	637710;643596;643626
TnS000009225g03	+	22	3	232424;232643;232754
TnS000086355g02	+	21	4	273866;273913;274102;274201
TnS000958203g02	-	6	1	174149
TnS000438403g17	-	8	2	1417252;1417529
TnS000051575g18	+	65	5	2072264;2072319;2072203;2072289;2072124
TnS000125709g04	-	15	1	137261
TnS000203467g03	+	65	6	272866;272792;272935;264115;267368;272739
TnS000454393g03	+	6	1	332453
TnS000058197g02	-	16	5	187557;187494;187652;187589;187772
TnS000115905g01	-	21	2	36288;36253
TnS000915177g01	-	8	2	46918;46804
TnS000247197g01	+	5	1	32065
TnS000806543g01	+	12	2	10880;10904
TnS000809851g12	-	6	1	1837878
TnS000490421g01	-	4	1	106885
TnS000541723g03	+	18	2	573641;573598
TnS000199659g06	+	4	1	417363
TnS000141783g01	+	12	2	315606;315565
TnS000196587g03	-	11	2	362358;362311
TnS000155889g04	+	5	1	216263
TnS000991505g05	-	26	2	241066;240978
TnS000860343g05	+	11	2	303439;303325
TnS000776413g05	+	78	7	630456;630532;630180;630358;630296;630385;630412
TnS000898375g01	+	3	1	36165
TnS000256293g01	+	7	2	18643;18693
TnS000816371g01	+	5	1	229427
TnS000314283g06	-	11	2	450596;450524
TnS000767679g02	+	23	4	128117;128294;128344;112421
TnS000899285g03	-	24	3	402937;402910;402888
TnS000388521g01	+	6	1	207118
TnS000803727g01	+	7	1	20066
TnS000057613g02	-	4	1	218090
TnS000261349g18	-	3	1	1639831
TnS000366987g01	+	3	1	58400
TnS000042319g03	-	14	3	440795;440066;440118
TnS000258283g05	+	8	1	359527
TnS000231977g03	+	7	1	463363
TnS000598403g03	-	5	1	209760
TnS000805763g04	+	3	1	303831
TnS000264493g25	-	5	1	1454062
TnS000932143g06	+	2	1	400996
TnS000423151g01	+	2	1	14306
TnS000779889g04	+	3	1	334543
TnS000821471g04	+	7	1	261424
TnS000257227g02	+	8	1	109441
TnS000928569g04	-	4	2	933391;933449
TnS000741727g01	-	7	1	102107
TnS000827737g01	+	26	1	94336
TnS000296435g01	-	4	1	484297
TnS000176469g03	+	6	2	249679;249494
TnS000918611g03	+	25	2	258972;258899
TnS000847209g03	-	5	2	618419;618449
TnS000203073g01	-	6	1	91554
TnS000332373g02	-	4	1	54410
TnS000687195g01	+	8	1	29255
TnS000235975g03	-	3	1	173090
TnS000380841g01	+	76	2	106145;106061
TnS000970371g02	+	19	4	185129;179216;184781;185184
TnS000453207g01	+	22	6	105773;105892;97323;105231;105634;105687
TnS000927893g02	-	4	2	150632;150675
TnS000875947g01	+	15	3	14059;13909;14267
TnS000546657g02	+	19	3	86254;87672;87620
TnS000290929g01	+	16	2	42359;42059
TnS001025259g02	-	4	1	107819
TnS001003069g03	+	5	1	344535
TnS000810133g02	-	2	1	110087
TnS000945273g10	+	3	1	590217
TnS000002047g01	-	7	1	70859
TnS000892201g03	+	10	3	240519;240572;240544
TnS000546833g09	+	12	1	687075
TnS000867145g05	-	6	1	1376623
TnS000525753g01	-	3	1	65659
TnS000220411g01	+	15	3	119015;119081;118969
TnS000674141g32	+	44	4	3020260;3020217;3020060;3020139
TnS000476983g03	-	4	1	331594
TnS000107479g01	-	8	1	100709
TnS000210897g01	+	18	4	123291;123386;116313;123061
TnS000865825g05	+	10	4	461109;461364;461247;461343
TnS000420823g05	-	25	4	579298;582135;579405;579337
TnS000226197g02	-	10	2	104514;104577
TnS000905799g10	-	2	1	1860999
TnS000662243g04	+	30	1	310382
TnS000332043g03	-	3	1	352183
TnS000413259g01	-	19	2	115816;115763
TnS000581465g01	+	3	1	321756
TnS000896885g01	+	6	2	48595;48730
TnS000790979g01	+	4	1	12765
TnS000881279g15	+	9	2	1129475;1129613
TnS000015235g07	+	12	3	362015;362173;355631
TnS000417301g04	-	5	1	374160
TnS000867017g22	-	36	6	2363376;2363342;2363884;2363671;2363504;2363692
TnS000479301g02	+	9	2	72128;75724
TnS000746445g02	+	4	1	162544
TnS000279713g15	-	145	4	1886349;1886482;1886325;1886691
TnS000096033g01	+	5	1	6744
TnS000090407g01	-	81	2	355845;355773
TnS000428321g04	+	3	1	779604
TnS000971669g03	-	16	4	152282;142637;142583;142664
TnS000806543g02	-	5	1	35781
TnS000184909g01	+	18	3	4651;4573;4815
TnS000035493g13	-	11	2	937545;937631
TnS000648635g05	-	15	3	262786;262897;262161
TnS000121025g04	+	6	3	278349;278330;278603
TnS000206363g01	+	6	1	27601
TnS000370427g01	-	10	1	7611
TnS000918259g02	-	8	3	156675;154647;156755
TnS000423983g02	-	21	2	128545;128654
TnS000481265g10	+	7	2	557182;582049
TnS000236655g01	-	4	1	120472
TnS000817631g01	-	7	1	14607
TnS000841501g10	-	3	1	939536
TnS000071835g06	-	23	4	229868;229930;230316;229775
TnS000111347g03	+	27	3	519262;519125;519217
TnS000921661g01	+	28	7	371131;370919;370780;370845;370948;370986;371010
TnS001018293g01	+	20	3	276869;276808;276841
TnS000019101g01	+	4	1	22210
TnS000498063g79	-	9	1	7229831
TnS000061465g02	-	10	2	102587;102828
TnS000018517g03	-	23	4	190048;190027;189942;190078
TnS000172131g01	-	5	1	37692
TnS000769779g03	-	16	4	135585;135904;135948;135559
TnS000830959g02	-	4	1	322698
TnS000422333g01	-	11	2	50660;50725
TnS000249121g02	-	10	2	226062;226007
TnS000751891g01	+	10	1	8419
TnS000015665g02	+	14	1	82245
TnS000253501g07	-	27	5	145212;145395;145238;145276;145257
TnS000155567g01	+	8	2	196926;196542
TnS000629879g05	-	3	1	311246
TnS000956987g02	+	7	2	106137;106239
TnS001029199g01	+	19	3	122899;122878;122976
TnS000075981g09	-	16	3	388427;388520;388581
TnS000237615g05	+	5	1	787268
TnS000071459g03	-	2	1	210167
TnS000396921g02	-	3	1	23009
TnS000237761g08	+	10	3	745700;745813;745517
TnS000649985g04	+	6	2	643872;643917
TnS000075981g10	-	6	1	447888
TnS000915711g03	-	3	1	114355
TnS000022011g04	-	4	1	344391
TnS000146501g06	+	4	1	768255
TnS000292607g03	-	7	1	165672
TnS000074797g06	-	22	2	500515;500534
TnS000075981g17	+	3	1	1505031
TnS000643479g01	-	3	1	14261
TnS000180655g01	+	17	1	108724
TnS000671695g02	-	12	1	114614
TnS000199425g01	-	6	1	66041
TnS000946769g01	-	13	3	2158;2037;2103
TnS000811015g12	-	15	1	1185090
TnS000770977g01	+	38	5	141269;141147;140961;122617;141017
TnS001019773g08	+	4	1	753190
TnS000976055g01	+	8	1	28653
TnS000197697g09	-	3	1	902986
TnS000166225g02	-	19	2	209669;209694
TnS000133039g01	-	2	1	165042
TnS000253293g02	+	13	3	100787;100834;100665
TnS000110159g10	-	14	4	963857;963591;962834;963729
TnS000064825g01	+	6	1	207793
TnS000939231g02	+	24	5	271754;249317;271638;271735;272146
TnS000855955g07	-	7	1	787851
TnS000189069g03	-	4	2	363364;363306
TnS000848219g14	+	69	8	886616;886451;886484;886688;886560;886293;886384;886580
TnS000002531g01	+	4	1	45572
TnS000329077g01	+	3	1	12805
TnS000996827g03	+	12	1	320754
TnS000061465g04	+	4	1	711413
TnS000503395g01	+	3	1	27067
TnS000584749g04	-	11	2	482171;482239
TnS000857049g04	-	110	5	250906;251100;250969;251140;250950
TnS000290929g04	-	8	2	442843;443028
TnS000851043g03	+	3	1	166112
TnS000058127g01	-	2	1	58554
TnS000462743g01	-	11	2	45017;44962
TnS000889661g01	-	114	11	150500;150438;150653;150466;150611;150687;148615;149372;150534;150579;150826
TnS000155183g01	-	6	1	87177
TnS000006461g02	+	5	2	146745;146633
TnS000146041g05	+	6	2	867898;867969
TnS000264597g10	+	75	6	945114;945088;945050;943949;944891;944989
TnS000573847g01	+	17	3	37853;37884;37903
TnS000046615g03	-	5	2	244412;244519
TnS000709213g01	+	14	3	64906;53533;64826
TnS000051575g16	-	23	3	1729524;1729463;1729383
TnS000468741g03	+	7	1	92760
TnS000015487g02	-	6	2	93568;93588
TnS000430387g02	+	16	1	189794
TnS000461181g04	-	12	2	343221;343342
TnS000252867g06	+	11	3	506821;402627;402521
TnS000516847g04	-	4	1	562117
TnS000257227g01	+	18	4	52600;26136;52363;42594
TnS000615439g04	-	3	1	139425
TnS000357043g06	+	12	1	764260
TnS000035757g01	+	7	1	13235
TnS001008727g17	-	36	6	1335410;1335504;1335241;1335350;1335379;1335602
TnS000412825g05	-	4	1	780578
TnS001036485g01	-	3	1	151000
TnS000649985g06	+	6	3	834082;773111;834199
TnS000752563g18	-	24	5	1478571;1478481;1478726;1478747;1478660
TnS001021927g06	-	6	1	264377
TnS000179673g04	+	5	1	293345
TnS000517513g03	+	25	4	329714;329544;327207;329679
TnS000356079g04	-	12	3	130850;148343;130884
TnS001028577g01	+	4	1	49050
TnS000919687g01	-	4	1	265012
TnS000719089g03	+	12	3	324864;318451;324776
TnS000226197g06	+	4	1	768908
TnS000509183g03	-	4	1	493564
TnS000847245g01	+	6	1	34750
TnS000775079g01	+	2	1	33261
TnS000299435g01	-	12	2	144354;144472
TnS001020783g01	-	2	1	101660
TnS000663753g19	-	3	1	1503707
TnS000888107g06	+	9	1	680765
TnS000040667g01	-	10	2	1471;1416
TnS000468647g04	-	16	2	183879;183813
TnS000124723g06	+	27	2	467377;467353
TnS000370427g04	-	4	1	229771
TnS000286199g01	+	12	2	94686;94655
TnS000857275g02	+	4	1	120726
TnS000770447g05	+	4	1	399798
TnS000423227g01	-	7	1	29728
TnS000935997g02	-	7	2	133574;133500
TnS000259729g10	-	6	1	1137249
TnS000265611g02	+	11	3	96215;96059;96134
TnS000824675g03	+	39	5	300726;300703;300629;300681;300762
TnS000428321g08	+	4	1	1416475
TnS000265611g03	+	5	1	178708
TnS000195893g02	+	3	1	255409
TnS000332043g02	+	12	3	336796;336821;336982
TnS000915711g04	+	5	1	260451
TnS000424419g02	+	4	1	163278
TnS000626343g01	+	26	2	144310;144332
TnS000257699g04	+	3	1	260727
TnS000622745g11	-	5	1	429961
TnS000527283g01	-	5	1	3025
TnS000159101g03	+	3	1	361043
TnS000600351g03	+	10	2	173147;173126
TnS000638589g01	+	5	1	16533
TnS000292707g01	+	7	1	27441
TnS000839235g02	-	14	3	36332;36387;37301
TnS000312727g04	+	3	1	372510
TnS000868813g01	+	2	1	67730
TnS000848219g18	+	76	13	1009679;1009852;1010063;1009985;1010142;1011470;1011586;1009617;1009700;1011449;1011506;1011540;1010036
TnS000930465g04	+	5	1	269634
TnS000145253g06	+	7	1	247332
TnS000886323g03	+	13	3	207373;207334;207282
TnS000070333g02	-	6	2	26685;78808
TnS000571301g05	+	7	1	458154
TnS000432943g02	-	5	1	87822
TnS000779485g01	-	4	1	184217
TnS000142969g12	-	4	1	1201933
TnS000382169g01	-	2	1	288814
TnS000032567g01	-	6	1	11224
TnS000249711g02	+	50	4	141550;141473;141380;141417
TnS000250567g01	-	3	1	63954
TnS000613069g07	+	6	1	735586
TnS000933661g08	+	14	1	1118957
TnS000544263g08	-	8	1	474345
TnS000679061g01	-	8	1	148438
TnS000765213g10	+	542	10	1012449;1012343;1012385;1012923;1012534;1012425;1012319;1012480;1012877;1012364
TnS000323239g01	-	10	3	15988;19715;19981
TnS000172145g03	+	2	1	194549
TnS000035493g06	+	3	1	497349
TnS000684327g07	+	19	2	493397;493357
TnS000119819g02	-	10	1	592902
TnS000487277g08	-	6	1	544584
TnS000927011g02	+	6	1	195589
TnS000021337g04	+	6	1	800064
TnS000960873g05	-	7	2	572869;572690
TnS000676227g09	-	8	2	1099508;1099468
TnS001038517g02	+	38	4	139183;139096;139203;139278
TnS000840319g02	+	31	1	64386
TnS000541587g02	-	7	1	225267
TnS000678221g05	-	6	2	362190;362098
TnS000930203g02	+	4	1	162057
TnS000994443g04	+	6	2	367882;367919
TnS000857305g01	-	10	3	10145;9915;10033
TnS000814197g03	-	2	1	346098
TnS000905799g07	-	7	2	1196183;1196306
TnS000164685g07	-	10	1	1002824
TnS000193939g03	-	11	2	137466;137591
TnS000751585g02	-	4	1	205085
TnS000935995g01	+	2	1	12674
TnS000703273g07	+	3	1	760908
TnS000749535g01	-	2	1	99417
TnS001018645g03	+	15	2	266977;266939
TnS000714413g04	+	59	3	136025;136157;135971
TnS000087807g01	-	6	1	188974
TnS000914191g03	+	8	1	455506
TnS000591365g08	-	5	1	1011203
TnS000450223g02	-	9	1	332955
TnS000816469g01	-	2	1	190289
TnS000026091g02	-	4	1	730312
TnS000767285g01	-	21	2	91551;91577
TnS000002575g06	-	15	3	512631;512697;512814
TnS000555441g02	-	12	3	230349;230542;230085
TnS000511471g03	-	2	1	558406
TnS000778229g03	-	17	4	226953;226862;227006;227196
TnS000157897g02	-	4	1	158241
TnS000962589g02	-	27	4	26403;27460;26492;26594
TnS000921035g01	-	5	1	42136
TnS000299765g04	-	10	2	359688;359823
TnS000178999g03	-	4	1	130279
TnS000301319g03	+	7	1	142750
TnS000889809g01	-	7	1	15968
TnS000817183g13	-	14	2	772673;772472
TnS000142561g03	+	4	2	534462;534490
TnS000060573g05	+	8	2	450839;451265
TnS000735819g01	+	6	2	74106;74055
TnS000140381g02	+	28	2	417749;417790
TnS000180755g01	-	5	1	17112
TnS000609043g04	-	6	2	182680;182704
TnS000835831g03	+	7	1	200283
TnS001021619g01	+	88	6	79750;79798;79843;79922;79960;79819
TnS000628203g19	+	4	1	2036456
TnS000594683g01	-	9	2	11234;11285
TnS000493537g03	-	2	1	301648
TnS000207955g03	-	31	4	312684;312788;312595;312571
TnS000953283g02	-	32	3	138465;138521;138545
TnS000656585g02	-	5	2	81658;81842
TnS000546833g05	+	14	2	454347;454240
TnS000177943g03	-	3	1	362001
TnS000936593g06	-	58	3	517508;517451;517563
TnS000972139g01	-	4	2	20066;20551
TnS000047801g03	+	7	1	165343
TnS000871735g01	+	29	3	11469;11616;11570
TnS000319117g06	-	3	1	1147426
TnS000390199g01	+	9	1	34494
TnS000918247g01	-	9	2	174756;141453
TnS000773353g02	+	8	2	207784;207965
TnS001009357g02	+	12	1	149070
TnS001033115g01	+	19	4	461832;461758;461803;461586
TnS000325949g01	+	14	4	21168;20511;21222;21384
TnS000178999g07	+	10	2	521912;522101
TnS000529633g02	+	8	1	177420
TnS000993421g01	+	3	1	143853
TnS000401465g01	-	7	1	7512
TnS000031311g01	-	19	2	125967;125857
TnS000907713g09	-	3	1	1079682
TnS000828859g02	+	8	2	74247;74025
TnS000480009g01	-	2	1	160058
TnS000824839g20	+	8	2	2081720;2081813
TnS000553213g02	+	6	1	153898
TnS000142979g02	+	21	4	276922;276958;276697;277011
TnS000876125g02	+	12	2	321439;321458
TnS000269885g13	+	2	1	571074
TnS000235975g04	-	3	1	283368
TnS000068155g01	+	52	6	237845;237869;212914;237594;237694;237820
TnS000414359g02	-	8	1	86983
TnS000264493g27	+	6	1	1724632
TnS000423079g08	-	3	1	875135
TnS000059937g04	-	3	1	304981
TnS000759969g02	+	7	1	218640
TnS000827741g05	-	2	1	310137
TnS000214051g01	-	16	1	103787
TnS000678221g19	-	18	4	2101595;2101675;2101754;2101637
TnS000814175g06	-	2	1	403205
TnS000695019g02	-	2	1	700831
TnS000989323g03	-	3	1	373754
TnS000429951g03	+	8	1	465243
TnS000498063g20	-	7	1	2081483
TnS000954133g04	-	7	2	287407;287489
TnS000921481g02	+	5	2	211428;211533
TnS000875155g06	-	20	2	377645;377721
TnS000934095g01	-	12	1	82933
TnS000792459g12	+	11	2	809147;809362
TnS000059771g02	+	3	1	105922
TnS000213501g02	-	9	1	108588
TnS000181465g01	-	2	1	41284
TnS000681293g01	-	7	1	34175
TnS000957825g06	+	11	2	227246;227221
TnS000986409g01	-	8	2	21094;21036
TnS000617729g02	-	4	2	68833;68974
TnS000877399g22	-	35	4	2780079;2780101;2780177;2780408
TnS000141003g05	-	4	1	536753
TnS000156387g06	+	5	2	527716;527650
TnS001002363g03	+	7	2	155132;155151
TnS000945273g08	-	5	1	305001
TnS000998553g02	+	2	1	29371
TnS000603761g01	+	27	4	381628;381585;381750;381770
TnS000437963g01	-	36	8	38769;38727;38627;38683;38884;38934;39325;40663
TnS000980175g03	-	4	1	468875
TnS000708831g01	+	4	1	12396
TnS000397783g01	-	36	4	9823;9735;9797;9842
TnS000540273g07	-	13	2	571278;571207
TnS000442331g01	+	6	1	5733
TnS000301319g04	-	12	2	144167;144229
TnS000237579g01	-	37	4	9649;9620;9781;9856
TnS000826449g05	+	12	1	249740
TnS000103057g07	+	10	2	748518;748400
TnS000146153g06	+	26	3	1051398;1051331;1051355
TnS000070227g09	-	6	1	711385
TnS000996769g04	+	3	1	569726
TnS000042319g04	-	65	3	649973;650023;650112
TnS000018813g01	+	8	2	58835;59580
TnS000036297g01	+	4	1	105338
TnS000035493g10	-	27	4	793777;793959;879740;879805
TnS000136271g03	+	14	2	145377;145499
TnS000791397g01	+	15	2	99884;100101
TnS000119431g01	-	59	4	25689;25624;25756;25664
TnS000044645g05	+	18	3	353103;353065;353002
TnS000541611g05	-	3	1	322403
TnS000230875g03	+	12	3	610784;610685;610850
TnS000908873g01	-	4	1	2259
TnS000877217g01	+	19	4	12365;12437;12411;12622
TnS000979079g03	+	8	2	508735;508817
TnS000608201g01	+	24	4	61512;61993;61751;61777
TnS000529593g01	-	90	1	17343
TnS000480543g06	+	9	1	558561
TnS000691499g03	-	9	3	178504;178665;178571
TnS000996827g04	+	29	2	551039;551059
TnS000388611g01	+	22	4	33153;33176;33253;33448
TnS000646977g04	+	3	1	297813
TnS000148149g04	+	8	1	326981
TnS000346547g03	-	3	1	494028
TnS000655273g02	+	4	1	75131
TnS000693233g04	+	6	1	441694
TnS000057085g03	+	4	1	159665
TnS000093361g02	-	2	1	148524
TnS000510917g02	-	7	1	164633
TnS000103057g01	+	4	1	51287
TnS000091781g07	+	14	3	266079;265987;266032
TnS000130997g02	-	116	4	424501;424527;424433;424371
TnS000295711g01	-	9	2	329219;329198
TnS000641359g01	+	7	1	64230
TnS000153841g02	-	13	1	228782
TnS000218531g08	-	8	2	1077844;1077897
TnS000692159g08	+	27	4	610083;610004;609951;610129
TnS000820811g02	-	104	9	58490;58565;58217;58515;58333;58065;58257;58589;58648
TnS000278327g04	-	2	1	931566
TnS001031547g03	-	2	1	173910
TnS000693881g02	+	5	1	318016
TnS000743821g01	-	13	2	10197;10121
TnS000762467g02	-	13	3	58478;58524;58560
TnS000218409g03	-	22	2	493370;493445
TnS000238769g09	+	2	1	1016105
TnS000864897g01	-	20	1	116072
TnS000706383g04	-	7	2	491686;491768
TnS000057613g09	+	6	2	439758;439929
TnS000577547g04	-	3	1	101581
TnS000035887g01	+	10	2	47268;47358
TnS000810771g02	+	4	1	155477
TnS000371983g07	-	68	2	418176;418321
TnS000585491g02	-	6	1	250593
TnS000182335g04	+	17	3	694065;694089;694126
TnS000055435g07	+	15	4	534599;534642;534684;529703
TnS000254899g01	+	9	1	34068
TnS000746485g04	-	3	1	175635
TnS000072889g01	-	6	1	76074
TnS000498745g02	-	96	3	152257;152325;152460
TnS000208299g01	+	2	1	30732
TnS000170537g04	-	34	3	192371;192390;192254
TnS000160869g03	-	4	1	400768
TnS000149975g06	-	9	2	736218;736257
TnS000646257g02	+	24	4	768295;731844;740413;767677
TnS000808977g01	+	10	1	41787
TnS000946799g01	+	18	3	61823;61742;61789
TnS000726069g07	-	11	1	388589
TnS000588755g02	-	9	2	107276;113755
TnS000566553g06	-	17	1	878427
TnS000041551g01	-	12	2	69442;70438
TnS000479359g05	+	5	2	417624;417728
TnS000829583g11	-	40	4	1298045;1297968;1298103;1297995
TnS000166101g06	+	20	2	246118;246080
TnS000005079g02	-	3	1	41786
TnS000440349g04	+	21	3	592994;592915;592955
TnS000493429g01	-	9	3	201255;201364;201278
TnS000020275g01	+	3	1	148161
TnS000528365g01	-	9	1	52143
TnS001023131g06	+	12	2	1169708;1169687
TnS000943217g01	-	5	1	150680
TnS000142615g01	+	6	1	82932
TnS000118175g01	+	3	1	24125
TnS000589683g08	+	74	4	1344317;1344228;1344292;1344174
TnS001008727g08	-	3	1	466258
TnS000789075g01	+	6	2	29351;29607
TnS000923949g15	+	3	1	1627549
TnS000096835g02	+	7	1	899321
TnS000906209g04	+	7	2	224261;224308
TnS000355969g01	+	12	3	86100;85940;85996
TnS000023027g02	+	2	1	290266
TnS000117891g05	+	6	1	800035
TnS000389281g03	-	20	2	320845;320807
TnS000423983g01	+	7	2	42192;42464
TnS000364023g01	-	8	1	1570
TnS000583159g10	+	23	4	662702;692848;692897;692999
TnS000902409g02	+	6	1	328554
TnS000113989g03	+	6	2	320365;320452
TnS000166611g01	+	4	1	44210
TnS000591365g15	+	9	4	1854224;1854195;1854325;1854141
TnS013912260g01	+	10	2	8162;3234
TnS000097109g33	+	19	3	2697097;2696993;2697119
TnS001041249g01	-	9	1	70553
TnS000709893g01	-	8	2	355915;356016
TnS000066331g13	+	44	7	893346;893367;891885;891687;893404;891964;893462
TnS000097785g04	+	6	2	214492;214590
TnS000414359g01	+	10	1	62531
TnS000832069g10	+	25	2	399438;399341
TnS000135743g01	+	11	3	171993;172182;172508
TnS000009855g05	-	25	3	554428;552918;552958
TnS000255845g05	+	6	2	212434;229231
TnS000264493g17	-	2	1	1001427
TnS000801895g01	+	11	2	78738;71179
TnS000322161g10	+	56	5	526919;526865;527042;526320;527002
TnS000133393g01	+	15	2	66897;66922
TnS000882249g01	+	4	1	102639
TnS000626283g04	-	18	5	50925;51024;51100;50859;52886
TnS000075601g02	+	3	1	89782
TnS000202953g01	+	4	1	193870
TnS013912342g01	+	3	1	5265
TnS000345353g01	+	5	1	5732
TnS000236373g01	-	3	1	118513
TnS000047601g03	+	14	2	63890;63957
TnS000172211g02	+	3	1	397950
TnS000079321g02	-	5	1	44628
TnS000182403g07	-	2	1	703422
TnS000989323g01	+	2	1	124597
TnS000132307g06	+	19	2	859128;859147
TnS000817183g07	+	13	3	501334;501217;501279
TnS000417463g04	+	9	2	260535;260360
TnS000986425g02	-	2	1	34030
TnS000820667g11	-	4	1	1774751
TnS000506745g03	-	4	1	362121
TnS000134725g02	+	8	2	95088;95123
TnS000019813g01	+	5	1	78733
TnS000753309g03	+	2	1	159330
TnS000935753g01	+	20	3	38029;38197;38245
TnS000444925g02	-	9	2	181783;181837
TnS000823535g06	+	13	3	826886;826808;826935
TnS000145253g07	+	34	4	350119;350000;349873;350249
TnS000084833g04	-	26	4	399385;399509;399424;423371
TnS000490421g02	+	5	1	170102
TnS000304669g01	-	13	3	11238;11315;11257
TnS000577547g24	+	23	3	1223793;1223857;1223941
TnS000187975g01	-	8	1	46612
TnS000757933g02	-	3	1	303831
TnS000408579g06	+	13	2	222626;222698
TnS000533031g02	+	6	1	92106
TnS000420067g03	-	15	3	61358;61485;61521
TnS000984855g07	-	9	2	440154;440246
TnS000273689g04	-	6	1	350359
TnS000662943g02	+	17	3	328102;328056;327989
TnS000086967g01	-	3	1	20385
TnS000057105g01	-	11	1	63499
TnS000474381g02	-	8	1	210436
TnS000037163g01	+	11	3	259431;259577;259490
TnS000305869g01	+	26	2	459242;459283
TnS000111069g02	-	20	4	170955;170992;170846;171158
TnS000516967g04	-	4	1	519283
TnS000207911g02	-	10	2	119433;119539
TnS001034193g02	-	4	1	60958
TnS000688411g14	-	9	2	968732;968781
TnS001041249g06	-	4	1	310886
TnS000302933g03	+	63	5	706331;706704;706369;706218;706660
TnS000750281g01	+	17	5	15505;15484;15404;15455;15540
TnS000016023g01	-	8	2	122713;169177
TnS000219571g01	+	3	1	27526
TnS000172145g05	+	49	4	274641;274581;274611;274550
TnS001029283g02	+	46	4	116309;61137;116206;116425
TnS000800343g03	+	15	1	659520
TnS000094869g02	+	8	2	222680;222557
TnS000157591g03	+	2	1	316149
TnS000068501g03	-	6	1	607695
TnS000941139g03	-	3	1	627633
TnS001023583g01	+	4	1	159712
TnS000832841g02	+	32	5	296142;296115;296188;296207;296722
TnS000612295g07	+	71	5	1300542;1300170;1300323;1300369;1300487
TnS000471345g11	+	5	1	809978
TnS000461511g12	+	33	5	1181005;1180968;1180915;1180880;1180942
TnS000113989g04	-	16	1	340960
TnS000801635g13	-	40	2	1834865;1834900
TnS000800343g10	+	61	6	1561021;1561173;1561214;1560943;1560608;1561062
TnS000011759g07	+	3	1	575363
TnS001042563g02	-	3	1	19215
TnS001021201g01	-	16	5	170656;170779;171162;171236;170760
TnS000544263g13	-	10	2	961400;946886
TnS000089725g09	-	8	3	789450;789616;789674
TnS000235315g03	-	20	2	279116;279069
TnS000645087g02	-	14	1	125568
TnS000146367g04	+	5	1	663542
TnS000866741g05	-	3	1	183024
TnS000875963g06	+	12	2	359982;359842
TnS000428321g07	+	2	1	1319648
TnS000736459g01	+	18	2	727;790
TnS000005821g01	+	3	1	242970
TnS000722343g01	+	2	1	108973
TnS000638025g03	-	2	1	171148
TnS000029049g03	+	11	3	149341;149284;149257
TnS000172145g01	+	7	2	20099;20026
TnS000318115g04	-	11	2	314791;315055
TnS000875001g01	-	43	5	3953;3995;3902;4124;4177
TnS000578743g02	+	6	1	142806
TnS000840713g01	+	4	1	145884
TnS000103297g10	+	20	5	1611128;1611147;1611306;1610875;1610898
TnS000506745g02	-	14	2	222587;222606
TnS000778831g02	+	9	2	80476;82433
TnS000282907g01	+	7	1	274595
TnS000027131g08	+	14	4	527969;527810;528142;527949
TnS000925207g07	-	4	1	1096640
TnS000506453g03	+	6	2	194360;194147
TnS000959799g01	+	16	1	35563
TnS000041285g01	+	3	1	14472
TnS000897855g07	-	9	2	415061;415084
TnS000871525g02	+	10	3	53994;53956;53909
TnS000506649g06	+	2	1	503784
TnS001015827g01	+	5	2	13409;13676
TnS000782909g04	+	3	1	381393
TnS000970257g01	-	14	3	22405;22262;22605
TnS000341393g01	+	4	2	126199;126219
TnS000820705g01	-	5	1	66650
TnS000485415g01	+	38	4	29531;29578;29457;29499
TnS000897565g01	+	6	1	272804
TnS000139427g05	-	19	2	252562;227559
TnS000450229g03	-	5	1	63032
TnS001022251g02	+	23	3	181337;181279;180814
TnS000433287g05	-	11	2	488241;488375
TnS000808237g02	+	4	1	194339
TnS000140939g02	+	14	1	293317
TnS000284473g05	-	12	2	408371;408426
TnS000017271g01	+	11	3	8533;8425;8368
TnS000954725g02	+	11	2	51640;51697
TnS000247119g02	+	4	1	161156
TnS000821831g01	-	4	1	44382
TnS000902351g01	-	5	1	67432
TnS000723155g04	+	5	1	234375
TnS000191245g06	-	9	2	386390;386170
TnS000963599g02	-	21	3	784964;785014;784912
TnS001039363g10	+	23	8	1357195;1357611;1366885;1372559;1372609;1359777;1372579;1372668
TnS000439871g02	+	7	2	186552;186532
TnS000379411g09	-	13	2	229248;229361
TnS000176325g01	+	2	1	96040
TnS000910341g02	+	5	1	166412
TnS000111477g09	+	8	1	753114
TnS000031243g01	+	28	4	15686;15719;15599;15849
TnS000748305g01	+	7	1	126994
TnS000035489g01	+	13	1	235766
TnS000576497g03	-	5	2	297294;297195
TnS000818879g06	-	7	1	2036384
TnS000907713g07	-	14	3	973642;973590;973465
TnS000689071g11	-	4	1	302648
TnS000131745g06	-	2	1	560772
TnS000444593g01	-	10	2	34627;34454
TnS000413755g06	-	49	3	208422;208295;208396
TnS000761293g03	+	4	1	342244
TnS000001435g03	+	4	1	230027
TnS000114035g01	+	8	2	110742;111048
TnS000899581g01	+	27	3	143643;143600;138985
TnS000927011g01	-	4	2	12525;12686
TnS000142615g14	-	28	4	716631;726495;716681;716760
TnS000767973g02	-	12	3	233081;233146;233506
TnS000754935g03	+	4	1	270970
TnS000789495g03	-	12	3	192107;192161;192253
TnS000784991g01	+	15	2	81658;81876
TnS000876701g01	-	52	4	116812;117310;117210;117185
TnS000948767g06	+	91	4	827921;827850;827801;828015
TnS013911926g02	+	12	2	6628;6388
TnS000035343g01	+	5	1	101460
TnS000865723g02	+	7	1	268925
TnS000156315g08	-	13	2	1213231;1213178
TnS000343415g01	+	2	1	12561
TnS000677859g01	+	33	6	154425;154444;7080;6985;7019;102173
TnS000470617g12	+	13	3	839665;839588;839866
TnS001017039g01	+	2	1	42003
TnS000049607g07	+	17	4	366003;364840;366042;366370
TnS000945431g01	-	10	2	33863;33894
TnS000690335g01	+	21	3	112807;112866;112943
TnS000574413g04	+	15	4	1069785;1069700;1069895;1069985
TnS000060595g02	-	3	1	118053
TnS000282907g06	-	10	2	933746;933656
TnS000946955g03	-	26	4	344881;345025;344900;344919
TnS000236141g01	-	8	1	16332
TnS000848219g10	-	15	3	426493;426609;427101
TnS001042379g01	+	4	2	10592;10765
TnS000222675g05	-	12	2	287628;297576
TnS000588755g03	-	59	4	217392;217301;217411;217431
TnS001040023g02	-	4	1	153316
TnS000500167g07	+	10	2	370942;371041
TnS000319463g03	+	4	1	232883
TnS000201967g01	+	16	3	248920;249159;249041
TnS000378019g05	-	16	3	384648;384769;384456
TnS000979079g01	-	4	1	79827
TnS000171755g07	-	10	1	932566
TnS000806355g01	-	19	2	13855;13918
TnS000894159g04	+	3	1	205239
TnS000870713g08	-	8	2	1613778;1613644
TnS000640765g04	+	3	1	506081
TnS001002589g02	+	7	2	93591;93625
TnS000817183g02	+	25	6	265907;256440;265855;265936;265955;265993
TnS000101221g02	-	11	2	209912;210124
TnS000932983g04	+	21	3	389603;389758;390064
TnS000638177g01	+	10	1	207766
TnS000045611g03	-	14	2	354606;354490
TnS000072619g04	+	4	1	424327
TnS000915517g04	+	16	4	421415;421556;421451;421631
TnS000326589g07	-	7	1	393584
TnS000647077g03	+	5	1	326793
TnS000051105g09	-	11	3	1575776;1575893;1575965
TnS000932349g01	+	8	2	106963;107065
TnS000530479g01	+	11	3	22414;22319;22341
TnS000472105g03	-	9	2	223320;223248
TnS000089725g07	+	7	1	679121
TnS000149205g02	+	9	1	192959
TnS000169225g02	+	4	1	207188
TnS001020355g01	-	6	1	79224
TnS001019729g04	-	5	1	476401
TnS000148855g02	-	83	8	83464;83502;83371;82741;83428;83682;83319;82699
TnS001005993g06	+	19	2	430334;429607
TnS000611769g02	-	11	1	182900
TnS000168259g01	-	20	4	26527;26272;26335;54767
TnS000159961g01	+	6	2	17084;28911
TnS000446549g01	+	21	3	35292;34591;35138
TnS000064931g11	+	4	1	827610
TnS000946955g04	+	11	3	367657;367723;367603
TnS000627689g03	+	4	1	312307
TnS000387913g07	-	3	1	583181
TnS000558897g03	+	5	1	310033
TnS000292477g04	+	6	2	629059;629193
TnS000892201g05	-	18	2	313461;313362
TnS000888225g01	-	16	3	14939;17323;15191
TnS000138039g03	-	46	4	123292;123220;123424;123460
TnS000741213g02	-	2	1	83590
TnS000125481g09	-	12	2	1173172;1173066
TnS000558897g04	-	23	2	475239;475122
TnS000427783g23	-	15	1	2999287
TnS000740941g01	-	57	3	200612;200636;200592
TnS000048449g06	+	7	2	585062;585376
TnS000674141g06	-	9	2	915817;915844
TnS000587783g02	-	4	1	80655
TnS000732031g02	+	12	3	204812;204887;204708
TnS000659067g14	+	47	2	2387231;2387296
TnS000794095g01	+	23	4	54056;53780;53911;53478
TnS001001897g03	+	6	2	160419;160167
TnS000856151g03	+	64	4	182234;181433;182188;182212
TnS000998475g04	+	12	2	366908;367034
TnS000960219g02	-	3	1	117051
TnS000923863g01	+	5	2	553031;552669
TnS000131573g02	-	9	1	343670
TnS000429115g03	+	15	2	191106;191321
TnS000264493g24	-	8	1	1436995
TnS000987883g03	-	8	2	551195;559045
TnS000839127g01	-	13	2	186250;186341
TnS000147751g01	+	10	1	45475
TnS000692159g16	+	7	1	1940661
TnS000666215g07	+	7	1	630738
TnS000326235g01	-	25	1	12803
TnS000420615g01	+	18	1	43399
TnS000506453g04	+	2	1	461736
TnS000860305g01	+	2	1	35620
TnS000898971g13	-	20	1	453896
TnS000776579g01	-	47	3	135304;135137;135408
TnS001020003g02	-	10	2	369874;369999
TnS000631917g08	+	7	2	540844;589041
TnS000241219g01	-	6	2	145004;144673
TnS000125113g03	+	17	4	329884;329908;329992;329968
TnS000363895g02	-	3	1	313631
TnS000975377g01	+	8	2	219019;219163
TnS000445193g02	+	15	5	222735;224855;224940;224916;225113
TnS001032509g02	+	7	3	8751;8862;8920
TnS000261349g09	+	4	1	956734
TnS000167913g03	+	7	2	209992;210061
TnS000696823g05	+	2	1	483336
TnS000122229g01	+	4	1	5408
TnS000835831g05	+	15	3	690507;690589;690643
TnS000095137g03	+	30	4	255613;255403;255494;255517
TnS000763667g04	-	24	7	360014;359913;359937;363088;359887;359971;359991
TnS000817183g10	+	17	3	640163;640250;640347
TnS000634011g02	-	10	1	86969
TnS000155889g08	-	3	1	841877
TnS000738073g07	+	3	1	860410
TnS000564307g03	+	13	1	379034
TnS000622357g01	-	12	2	4418;4469
TnS000881329g02	-	5	1	66466
TnS000478477g09	-	64	3	758248;758214;758275
TnS000963655g01	+	5	1	55878
TnS000652921g04	-	5	1	66532
TnS000738073g12	-	9	1	1599592
TnS000934095g04	+	14	3	513673;513743;354854
TnS000153861g01	+	6	1	8061
TnS000167631g01	-	4	1	79925
TnS000875001g03	+	21	4	203473;203562;203678;203527
TnS000080275g01	+	6	2	10130;10243
TnS000937925g05	-	10	2	289794;289937
TnS000400187g05	-	7	1	293204
TnS000070897g04	+	4	1	632131
TnS000170799g08	-	11	2	365477;365564
TnS001021927g11	+	8	1	885824
TnS000905347g01	+	40	5	109845;110171;110092;109787;109873
TnS000624169g01	+	9	3	148779;154061;132862
TnS000989587g01	+	3	1	9837
TnS000242443g16	+	2	1	905290
TnS000958977g03	+	6	1	911572
TnS000951145g10	+	6	1	1348239
TnS001020801g01	+	13	2	459154;466982
TnS000583511g03	-	24	5	72638;70937;71000;70917;71030
TnS000254749g07	+	3	1	668418
TnS000895649g01	+	20	3	5936;5842;5704
TnS000290555g13	-	2	1	768605
TnS000286365g07	-	18	3	775483;775392;775431
TnS000155889g12	-	8	2	1034075;1034279
TnS000366233g02	-	3	1	182280
TnS000805111g06	+	4	1	217513
TnS000699685g02	-	10	1	377666
TnS000027671g04	+	4	1	87944
TnS000895955g01	+	7	2	52451;52427
TnS000886323g02	+	4	1	100904
TnS000120933g16	+	13	2	1411436;1412766
TnS000899267g02	+	3	1	125732
TnS000979179g01	+	10	1	110864
TnS001031547g06	-	6	1	320767
TnS000012029g02	-	2	1	74664
TnS000603279g12	+	8	2	1783513;1783576
TnS000420459g02	-	2	1	181908
TnS000008643g09	+	52	4	535840;536040;536171;531488
TnS000631495g01	+	12	3	329880;318203;329918
TnS000821077g04	-	3	1	784139
TnS001019987g01	+	18	3	113948;114050;113715
TnS000160957g01	+	8	1	20845
TnS001007481g05	-	19	5	96717;97481;96695;97516;97571
TnS000946403g08	-	10	2	858565;858534
TnS000766551g01	-	5	1	163843
TnS000118893g06	-	5	1	399635
TnS000997967g02	-	13	2	243224;243315
TnS001006581g01	-	9	1	56519
TnS000725583g03	-	46	4	186559;186475;184124;186644
TnS000931713g01	+	14	3	20659;20690;20625
TnS000694103g03	+	33	4	186951;186841;186928;187110
TnS000510797g05	+	2	1	919549
TnS000420823g06	+	3	1	685339
TnS000694841g03	+	52	1	238877
TnS001012613g01	+	23	3	23592;23514;23255
TnS000261349g01	-	45	6	23686;23615;23667;23763;23836;23732
TnS000643479g02	+	40	2	246934;246864
TnS001039729g01	+	2	1	16173
TnS000881831g02	-	11	1	169620
TnS000171799g03	-	3	1	236129
TnS000252665g01	+	9	2	13253;13228
TnS000615653g12	-	3	1	2128183
TnS000095137g01	+	3	1	11060
TnS000890727g01	-	2	1	28291
TnS000135803g03	-	15	2	76636;76611
TnS000076323g06	+	546	9	1104957;1104915;1104842;1104980;1105025;1104934;1105108;1104813;1104889
TnS000756863g02	-	45	5	296735;296805;296875;296948;296899
TnS000972799g04	+	22	5	365635;365813;365746;365794;363548
TnS000277459g01	-	3	1	30224
TnS000247119g04	-	3	1	249752
TnS000093019g01	-	10	1	19015
TnS000794351g09	-	14	1	968950
TnS000751093g03	+	6	2	170835;170762
TnS000065009g06	+	7	1	254471
TnS000823479g01	-	14	1	69339
TnS000689071g08	+	12	2	261040;261091
TnS000408531g04	+	6	1	826627
TnS001023411g10	+	6	2	401205;401255
TnS000041303g10	+	7	1	523730
TnS000982989g04	-	87	4	500294;500185;500721;499740
TnS001022663g01	-	9	2	190985;190933
TnS000932641g03	-	13	3	190761;191157;190674
TnS000117923g03	-	11	2	118798;118671
TnS000517513g02	+	6	2	277329;277357
TnS000903297g05	-	3	1	540030
TnS000895889g03	+	14	2	182004;181827
TnS000898945g03	+	18	2	257435;257640
TnS000266789g01	+	5	1	116094
TnS000047801g05	+	19	3	316755;316538;316591
TnS000214503g03	-	8	1	132169
TnS000314403g02	-	2	1	94007
TnS000600351g08	-	2	1	802060
TnS000239687g01	+	11	3	20121;20188;20000
TnS000263253g02	-	4	1	105646
TnS000829739g02	+	20	3	116261;116224;116005
TnS000024569g01	+	6	1	61304
TnS000729105g05	+	8	1	226152
TnS000700771g13	-	25	5	570044;569968;569771;570018;570114
TnS000971113g01	-	4	1	83045
TnS000077561g01	+	13	2	38904;39053
TnS000962261g01	+	6	1	204417
TnS000109587g02	+	10	2	125496;126916
TnS000667719g02	-	6	1	134554
TnS000491129g03	-	2	1	128607
TnS000692159g17	-	4	1	2137240
TnS000507539g01	+	2	1	123096
TnS000946799g02	-	4	1	108087
TnS000316119g02	-	7	1	246356
TnS000008661g03	+	26	5	1136836;1137019;1102664;1136891;1137501
TnS000081733g02	-	2	1	218387
TnS000998363g01	+	128	3	49460;49368;49429
TnS000435721g28	+	4	1	2304874
TnS000878817g01	+	3	1	100383
TnS001000703g01	+	10	4	99941;99999;100037;100960
TnS000368105g01	+	102	2	61031;60800
TnS000161879g01	+	12	2	56539;57807
TnS000689071g14	+	2	1	490780
TnS000752021g01	-	3	1	92033
TnS000820667g08	+	3	1	1353528
TnS000870713g10	-	16	3	1794881;1794806;1794932
TnS000646977g02	-	7	2	206068;203749
TnS000530479g03	+	13	3	183479;183558;183341
TnS000903901g01	+	7	1	31746
TnS000041665g04	-	7	3	538999;538758;538948
TnS000004985g02	+	8	1	182815
TnS000630181g05	+	32	4	379908;379812;379936;379999
TnS000564307g04	+	266	6	411545;411483;411353;411312;411402;411510
TnS000038537g01	-	15	3	556505;556606;560510
TnS000684327g06	-	25	2	365004;365084
TnS000803631g01	-	4	1	22831
TnS000749593g01	+	3	1	422730
TnS000647077g04	-	83	4	350546;350672;350603;350625
TnS000509253g01	-	59	5	156203;156442;156337;156570;156120
TnS000467487g03	+	3	1	635942
TnS000093361g06	-	11	2	393506;393645
TnS000031647g16	-	19	4	1373933;1373708;1373992;1374179
TnS000304021g07	-	12	2	556717;556771
TnS000418895g01	+	4	1	320344
TnS000084833g06	-	16	1	562062
TnS000106555g01	+	7	2	9678;27365
TnS000773495g06	+	4	1	1069333
TnS000959365g01	+	10	1	259857
TnS000639443g02	+	13	3	435121;427480;435199
TnS000876593g01	+	84	3	85620;85546;85567
TnS000842779g01	-	14	2	44993;44919
TnS000486009g03	-	2	1	239797
TnS000045385g01	+	32	2	95322;95299
TnS000675655g03	+	2	1	237267
TnS000904857g06	+	3	1	444782
TnS000411229g02	-	6	1	40783
TnS000145889g01	+	3	1	50126
TnS000290555g14	+	3	1	903071
TnS001029199g15	-	30	2	2036758;2036584
TnS000609421g04	-	21	3	312456;312382;312414
TnS000002373g01	+	2	1	10530
TnS001037001g02	+	2	1	601885
TnS000468741g06	+	3	1	509734
TnS000756143g01	-	11	1	94882
TnS000201597g01	+	13	2	31166;30691
TnS000734207g04	+	4	1	600593
TnS000035493g20	+	141	8	1546603;1546468;1546574;1546822;1546511;1546533;1546685;1546841
TnS000467487g09	-	3	1	1747903
TnS000638655g03	+	18	3	403957;404060;403664
TnS000106039g05	-	4	1	546818
TnS000086753g06	-	4	1	495454
TnS000259041g02	-	5	1	34506
TnS000577547g17	+	6	2	855367;855479
TnS000866317g01	-	10	2	90409;90324
TnS000142969g11	+	9	1	1077986
TnS000198223g02	+	5	1	82371
TnS000154435g01	-	9	1	10631
TnS000033709g03	-	17	2	137617;137419
TnS000282047g03	+	26	6	84151;84171;84265;84245;84197;84305
TnS000553811g02	+	4	1	97563
TnS000507375g26	+	5	1	1727431
TnS000776667g01	-	3	1	14817
TnS000168789g01	+	4	1	45723
TnS000287435g17	-	4	1	2224500
TnS001035995g01	+	4	1	252532
TnS000075309g01	+	13	1	102620
TnS000358499g02	-	4	2	233708;233759
TnS000888407g01	+	13	4	25261;25284;25192;25213
TnS000476507g06	+	17	1	603951
TnS000108357g06	+	12	4	674434;674577;674865;674622
TnS000704251g04	-	41	3	578025;578048;578067
TnS000397783g11	+	9	2	806306;806232
TnS000104561g01	-	6	1	16097
TnS000931505g01	-	8	3	67480;67549;67633
TnS000460777g01	+	3	1	340527
TnS000806355g02	+	103	4	17058;17100;16167;16642
TnS000666215g03	-	8	2	81173;81357
TnS000934945g01	+	9	4	91809;86894;87146;91919
TnS000011759g10	-	15	2	719142;717049
TnS000198535g01	-	4	1	56956
TnS000224837g01	-	16	3	64114;64262;63964
TnS000870381g02	+	18	4	345125;344909;344998;344888
TnS000199425g10	+	2	1	830093
TnS000295787g06	-	3	1	536836
TnS000160961g01	+	7	1	31322
TnS000891351g03	+	46	4	188431;188369;188287;188409
TnS000763961g01	-	2	1	72065
TnS000583923g03	+	4	1	552903
TnS000734207g01	-	2	1	242691
TnS000833795g05	+	3	1	736033
TnS000122145g16	-	12	3	1707190;1707274;1707309
TnS000549981g08	+	2	1	567235
TnS000010783g01	+	11	2	30841;24251
TnS000094917g01	+	11	2	43327;43354
TnS000378927g11	+	6	1	1167400
TnS000888225g04	-	5	1	90800
TnS000265641g02	+	7	1	215818
TnS001037813g08	+	18	3	1092333;1092446;1092354
TnS000938571g05	-	4	1	415611
TnS000631917g02	-	56	6	38483;38503;38264;38557;38629;38323
TnS000648987g01	-	23	2	167316;167352
TnS000694151g01	+	2	1	114440
TnS000903091g01	+	13	3	67285;63928;67247
TnS000966627g01	+	8	1	49559
TnS000436805g05	+	4	1	298711
TnS000579701g02	+	12	4	211078;216052;218042;218215
TnS000498063g42	-	18	3	4014907;4014784;4018332
TnS000476507g01	+	6	2	112912;113119
TnS000809851g27	+	9	2	3102775;3102456
TnS000640125g04	+	12	2	458100;457988
TnS000833929g02	-	3	1	135780
TnS000009225g04	-	7	1	233583
TnS000829585g01	-	4	1	170200
TnS000904019g04	-	6	1	422136
TnS000287911g03	+	2	1	111777
TnS000816845g03	+	17	3	170141;170224;170174
TnS000600727g01	+	15	2	15869;15941
TnS000243917g03	+	34	4	410768;410510;410831;410858
TnS000901763g03	+	22	3	184437;184376;185105
TnS000197491g06	-	4	2	326155;326039
TnS000968413g06	+	5	1	365373
TnS000858623g02	+	4	1	146951
TnS000001435g02	+	11	2	56522;56553
TnS000051751g04	+	22	2	174998;169610
TnS000184407g01	+	47	2	60733;60577
TnS000986829g01	+	27	3	122559;122521;121873
TnS000577547g09	-	12	2	252797;252709
TnS000049325g05	-	43	3	274916;274882;274851
TnS000427783g07	-	10	1	525253
TnS000258283g04	+	75	6	338479;338397;338637;338007;338427;338664
TnS000547167g11	-	11	2	1051288;1051061
TnS000406661g01	+	9	2	5467;5636
TnS000886323g05	+	10	2	395579;395383
TnS000923257g01	-	6	1	40547
TnS000220661g05	-	50	4	728529;728414;728603;728838
TnS000577103g05	-	7	2	625150;625240
TnS000828647g01	+	3	1	38744
TnS000546439g06	+	11	2	867879;867979
TnS000029377g01	+	2	1	51121
TnS000172833g05	-	5	2	1031309;1031331
TnS000414359g12	-	12	2	826729;826757
TnS000996543g09	+	10	2	1173820;1174619
TnS001022191g02	+	6	2	75482;75514
TnS000076667g05	+	3	1	497792
TnS000162935g04	+	8	1	634928
TnS000996777g10	-	9	3	870486;870624;870510
TnS000522937g01	-	4	2	43074;42862
TnS000457203g13	+	6	1	824425
TnS000363895g05	+	52	5	706435;706717;706668;706548;706789
TnS000464453g07	+	4	1	1400967
TnS001000527g03	-	21	3	187323;187381;187211
TnS000035757g03	-	21	3	169272;173111;173140
TnS000845803g02	+	4	1	52221
TnS000289289g03	+	8	1	299476
TnS000729703g07	-	4	1	554073
TnS000935225g02	-	3	1	85197
TnS000846507g01	-	10	2	55621;55449
TnS000530825g05	-	2	1	529098
TnS000577547g01	-	14	2	13768;13660
TnS000380533g07	-	10	2	482612;482687
TnS000437089g02	+	2	1	96551
TnS000703273g17	+	4	1	1872555
TnS000022011g01	+	7	1	113825
TnS000615171g02	-	7	1	161747
TnS000830595g15	+	8	1	1099480
TnS001035441g02	-	21	3	223239;223097;223001
TnS000498063g28	+	27	5	2690959;2690987;2691233;2691311;2691367
TnS000911567g03	+	22	5	167929;168068;167890;168008;167819
TnS000985899g01	-	9	2	90963;91030
TnS000327247g06	-	19	3	387453;387627;387503
TnS000461313g02	+	16	3	227809;227904;227737
TnS000838859g03	+	6	1	244274
TnS000022753g06	+	6	1	320672
TnS000385049g04	-	37	3	147093;146966;147123
TnS000684153g01	-	18	3	3002;2953;3024
TnS000778557g02	+	9	1	873310
TnS000456773g05	-	7	1	144519
TnS000817183g23	-	17	3	1575245;1574971;1575265
TnS000176751g02	+	12	1	162744
TnS000145039g01	+	13	2	65642;65798
TnS000053457g01	+	25	4	232708;232551;232685;232628
TnS000085963g03	+	8	1	289430
TnS000924699g03	-	2	1	352253
TnS001031169g03	-	14	2	581994;582013
TnS000777069g03	-	31	4	418401;418366;418421;424377
TnS000792459g14	-	3	1	906765
TnS000800909g09	-	21	3	873205;873239;873259
TnS000054669g03	-	14	3	125252;125277;125308
TnS000290555g17	-	35	2	1110052;1110015
TnS000559853g01	-	2	1	50840
TnS000920123g03	-	33	6	159609;159804;159901;159924;159714;159881
TnS000747423g03	+	17	3	466619;466573;466530
TnS000641173g02	-	17	3	119823;119842;119863
TnS000804411g02	+	26	5	578565;577990;578584;578090;577929
TnS000123391g05	-	2	1	214057
TnS000201147g01	+	10	2	20008;20109
TnS000382299g06	+	5	1	1100846
TnS000450055g11	-	3	1	918637
TnS000135585g10	+	7	1	953578
TnS000097109g01	+	5	1	28322
TnS000769693g01	-	7	2	218826;218715
TnS000973325g01	-	6	1	272041
TnS000071459g01	-	4	1	32431
TnS000933503g01	+	10	3	60421;47033;60490
TnS000172131g07	+	8	1	430904
TnS000560433g06	-	17	3	170551;170667;170635
TnS000235315g04	-	5	1	483148
TnS000825757g01	+	8	2	50277;21610
TnS000203073g11	+	4	1	1101571
TnS000821225g02	+	9	1	365359
TnS000848033g02	+	8	1	135068
TnS000998883g01	+	16	2	199211;199010
TnS000935781g01	-	4	1	25815
TnS000423067g02	-	4	1	284480
TnS000036561g03	-	7	2	121235;121013
TnS000972757g03	+	5	1	282607
TnS000759069g05	-	27	2	312583;312822
TnS000020415g03	+	3	1	312619
TnS000069483g09	-	10	2	816473;816433
TnS000413353g04	+	2	1	244584
TnS000813181g02	+	23	3	166735;166847;166799
TnS000655931g05	-	33	5	1133030;1133065;1133188;1133101;1133260
TnS000891423g04	+	31	4	431557;431506;431596;431474
TnS000968969g01	+	12	2	33105;33130
TnS000257699g06	+	4	1	457714
TnS000640815g11	-	8	3	1188558;1188484;1188594
TnS000047601g05	+	11	2	177862;177897
TnS001008727g07	-	3	1	345084
TnS000670245g02	+	23	2	334357;334555
TnS000592665g03	-	34	4	349007;372616;365500;372589
TnS000850577g04	-	4	1	534027
TnS000545385g12	+	16	3	655475;654742;655546
TnS000577257g04	-	160	3	320588;320525;320669
TnS000813189g01	+	19	3	18514;18599;18878
TnS000391609g02	-	5	1	48336
TnS000867017g31	+	28	5	3455446;3436508;3436589;3455421;3455476
TnS000827505g06	-	2	1	758742
TnS000640641g05	-	9	1	603332
TnS000547167g06	-	6	1	795248
TnS000561697g01	-	4	1	83106
TnS000839171g01	+	11	3	27789;27898;12416
TnS000545957g03	+	20	2	137707;137771
TnS000994443g23	+	5	1	2260518
TnS000043073g03	-	2	1	280110
TnS000302405g06	-	23	2	151152;151045
TnS000972273g04	-	14	1	111076
TnS000737927g02	+	9	1	237778
TnS000861307g01	+	10	2	15082;15346
TnS000622745g13	-	14	3	455086;454862;454967
TnS000819183g04	-	18	2	446946;446786
TnS000555485g01	+	6	1	109119
TnS000545385g09	+	3	1	503111
TnS000776579g05	+	3	1	343182
TnS000821471g03	-	9	2	190618;190533
TnS000866741g03	-	3	1	101475
TnS000974901g23	+	7	1	905597
TnS000839827g14	+	5	1	1420723
TnS000002463g01	+	14	2	55049;55260
TnS000408461g03	-	2	1	364060
TnS000790335g02	+	3	1	243903
TnS000807739g01	+	51	5	21997;21934;21901;21961;22018
TnS000495043g05	-	12	2	241461;241343
TnS000958347g01	+	59	7	85791;85537;85878;85592;85694;85482;85635
TnS000290555g11	-	10	3	438968;439048;530245
TnS000254749g06	-	8	2	505846;506024
TnS000865851g01	+	22	6	35879;35417;35532;35740;35704;35784
TnS000582695g03	-	241	6	900370;900495;900429;902534;900344;900531
TnS000189967g06	+	6	2	640073;639962
TnS000540273g01	+	3	1	139173
TnS000205277g01	+	7	1	175347
TnS000684621g01	+	3	1	13196
TnS000912337g03	+	16	1	262689
TnS000783711g01	+	5	1	169410
TnS001032267g01	+	4	1	104781
TnS000857049g03	-	7	1	202389
TnS000719089g23	+	11	1	1657498
TnS000482629g01	-	3	1	115976
TnS000009773g03	+	15	5	333131;332055;332245;332642;332005
TnS000013321g02	-	2	1	456184
TnS001040023g04	-	3	1	277162
TnS000226557g04	+	11	2	932221;954985
TnS000849959g01	-	9	2	30415;30516
TnS000124043g04	-	768	5	396460;396412;396287;396595;396489
TnS000731583g05	+	18	3	714027;708375;710249
TnS000755945g03	-	2	1	122524
TnS000617853g02	+	4	1	39058
TnS001041799g06	+	4	1	664152
TnS000670009g01	-	196	14	76166;76109;76018;76142;78661;76208;76246;78577;76043;79112;79282;78728;79163;80218
TnS000802873g01	+	3	1	48186
TnS000907713g06	-	37	3	797748;797612;797686
TnS000574223g03	+	5	1	201225
TnS000387089g07	-	5	1	340161
TnS000568967g04	+	14	3	478285;478112;478252
TnS000506745g01	+	5	1	215653
TnS000615171g03	-	67	3	463368;463265;463452
TnS000249031g06	-	2	1	143552
TnS000490811g02	+	44	4	107161;106932;107334;105367
TnS000788347g03	+	11	1	183111
TnS000055399g01	-	11	1	10592
TnS000191543g01	+	5	1	129041
TnS000465361g01	+	27	3	110084;110022;110058
TnS000516129g01	+	5	2	233628;233815
TnS000956981g05	-	80	4	382259;381996;382293;381921
TnS000549037g02	-	5	2	132669;133794
TnS000490535g01	-	42	5	81269;81290;81339;81524;81367
TnS000261797g17	-	55	6	1104465;1104501;1104522;1104382;1104405;1104548
TnS000655603g09	+	55	4	1080398;1080288;1080338;1080263
TnS000879889g02	+	3	1	14511
TnS000701533g01	-	11	1	26791
TnS000180801g01	+	3	1	20050
TnS000730319g01	-	3	1	112485
TnS000453267g01	-	12	1	238893
TnS000792459g06	-	12	1	221495
TnS000083883g01	+	19	4	6825;7128;6736;7239
TnS000138667g03	-	10	2	184102;184065
TnS000675633g01	-	8	2	79871;79775
TnS000799009g02	+	2	1	209436
TnS000776413g17	-	3	1	1591644
TnS000226557g11	-	10	2	1693315;1693016
TnS000506453g05	+	15	3	557630;557688;554355
TnS000330331g01	-	2	1	149752
TnS000801635g01	+	6	2	235330;235253
TnS000930465g02	+	10	2	145955;145974
TnS000895181g05	-	4	1	499255
TnS000976981g06	+	8	2	556645;556574
TnS000766203g03	+	5	1	86352
TnS000218633g04	+	7	1	240850
TnS000033869g01	-	8	1	11786
TnS000833519g01	+	18	3	17007;9999;16959
TnS000679707g04	-	5	2	414200;414247
TnS000678221g07	+	9	1	777768
TnS000876125g04	+	12	1	790814
TnS000516169g01	-	9	1	117807
TnS000588041g02	+	12	2	317824;317855
TnS000971447g03	+	3	1	197975
TnS000243511g04	+	4	1	136679
TnS001017339g01	+	6	1	115718
TnS000731401g04	-	63	2	612393;612301
TnS000543881g04	-	3	1	466091
TnS000457701g07	-	23	5	300532;300294;299876;300046;300402
TnS000612329g03	-	97	3	512741;512779;512815
TnS001013965g09	+	3	1	872524
TnS000732417g01	-	17	2	48240;46221
TnS000435351g03	-	14	1	280034
TnS000842983g07	-	7	1	317865
TnS000527347g03	-	68	7	334839;334769;334687;334749;335172;334595;335089
TnS000873383g08	+	9	1	781833
TnS000144097g01	-	41	4	43261;43344;43154;43287
TnS000269965g01	-	7	2	14949;14983
TnS000577547g03	-	3	1	79406
TnS000494949g02	-	4	1	116878
TnS000002575g13	+	5	1	1138851
TnS000881329g04	+	5	1	535826
TnS000090457g06	+	47	1	788874
TnS000487577g03	+	8	1	335683
TnS000142615g05	-	34	2	299956;300071
TnS000836361g06	+	6	1	376998
TnS000122471g05	+	5	2	513998;514028
TnS000802287g01	-	5	1	82498
TnS000748833g13	+	9	2	503257;503314
TnS000190843g03	+	19	3	102623;102854;102461
TnS000676107g03	+	4	1	824920
TnS000171755g09	+	4	1	1144715
TnS000850087g03	+	2	1	523614
TnS000837707g01	+	2	1	29433
TnS000946403g09	+	8	2	928595;1072623
TnS000783711g04	+	19	3	429101;429233;429120
TnS000016133g01	+	8	1	43749
TnS000234759g01	+	5	1	126937
TnS000036231g02	-	5	1	214715
TnS000292945g01	-	3	1	30608
TnS000194637g01	+	7	2	11968;11988
TnS000629285g01	+	11	2	81489;81460
TnS000742343g01	+	3	1	19863
TnS000014471g07	+	7	2	451630;451675
TnS000249121g01	-	18	2	122361;122338
TnS000314027g05	+	22	3	57949;58031;58254
TnS001029693g01	+	8	1	25736
TnS000792037g01	-	2	1	71862
TnS000247985g08	-	13	3	602774;602716;602924
TnS000867017g19	-	5	1	1782176
TnS000746199g01	-	6	1	36008
TnS000139725g01	-	9	1	6018
TnS000834949g04	-	5	1	214686
TnS000057613g14	-	4	1	553203
TnS000060437g01	+	14	4	12186;11797;12116;4836
TnS000811647g03	-	29	3	431870;431921;431843
TnS000653633g03	+	4	1	311350
TnS000262815g02	-	27	4	61515;61594;61536;61745
TnS000545385g11	-	17	1	601869
TnS000938735g01	-	5	1	79016
TnS000097785g02	+	74	8	153040;152973;153004;128418;152936;139123;152858;152893
TnS000754619g02	+	4	1	577707
TnS000299451g03	-	6	1	418328
TnS000370885g04	-	3	1	543355
TnS000386481g04	-	8	1	656193
TnS000508917g05	+	16	3	292514;292462;292570
TnS000194659g04	+	24	4	144061;144137;143988;143963
TnS000331967g08	+	13	2	887182;887257
TnS000636259g01	+	9	2	331163;353646
TnS000261359g01	-	4	1	37042
TnS000385049g11	-	27	4	789158;789215;789119;789337
TnS000400853g04	+	5	1	434093
TnS000078661g05	+	35	5	912692;912670;912785;913029;912621
TnS001029199g07	-	11	2	982147;982435
TnS000305447g01	+	2	1	188009
TnS000356227g07	+	8	2	536073;528892
TnS000197537g01	+	2	1	110353
TnS000171799g02	-	2	1	120987
TnS000097109g08	+	25	5	365817;365617;365672;365921;365738
TnS000844871g07	+	5	1	567736
TnS000070949g04	+	21	4	327847;327912;327798;327937
TnS000141653g01	+	14	2	16382;16331
TnS000982989g06	-	2	1	629685
TnS000396329g02	-	5	1	285131
TnS000443893g01	-	19	2	162245;162981
TnS000821471g20	-	5	1	2381153
TnS000650823g04	+	4	1	445910
TnS000840319g03	-	4	1	85539
TnS000867875g02	-	30	6	176378;176359;176335;176401;180088;180258
TnS000415443g02	+	15	2	235025;234949
TnS000214043g03	-	16	4	354301;353689;354273;354326
TnS000099607g01	+	17	4	45767;35234;45692;45841
TnS000479301g07	-	39	2	251817;251851
TnS000098761g20	-	14	2	1177431;1177645
TnS000493429g02	-	5	1	266998
TnS000517351g03	-	7	2	287795;287937
TnS000910729g07	-	17	3	381469;381406;381439
TnS000254289g01	+	5	1	61558
TnS000006303g05	-	45	2	595284;595209
TnS000972563g03	+	29	3	316376;316301;310297
TnS000216073g01	+	10	2	35871;35935
TnS000408461g04	-	3	1	536003
TnS000508917g09	-	2	1	1047085
TnS000321571g04	-	26	4	206605;206446;206548;206508
TnS000306427g05	+	6	2	344117;347400
TnS000701611g08	-	4	1	891673
TnS000020479g01	+	4	1	135755
TnS000733617g03	+	12	1	77144
TnS000615653g03	+	9	1	315036
TnS000286199g07	+	2	1	996306
TnS000392043g01	-	6	2	28752;28846
TnS000054669g01	+	13	2	64699;64795
TnS000810107g01	+	7	1	140383
TnS000254461g05	-	4	1	524175
TnS000956385g02	-	3	1	179852
TnS000118115g01	-	3	1	53418
TnS000891423g03	+	4	1	298528
TnS000251821g10	-	12	2	605307;605415
TnS000112257g05	+	4	1	340792
TnS000830595g06	-	12	1	292768
TnS000060595g03	-	6	1	135282
TnS000200351g03	+	4	1	198684
TnS000079755g03	+	6	2	348392;348480
TnS000141905g01	+	4	1	374136
TnS000235269g01	+	12	3	108188;107944;108016
TnS000118893g07	-	8	3	440073;574552;484027
TnS000558519g02	-	10	2	47861;51106
TnS000760657g01	+	16	2	44673;44749
TnS000093077g02	+	8	1	21392
TnS000338783g02	-	4	2	134132;134011
TnS000021013g01	+	6	1	115214
TnS000568083g02	+	3	1	242189
TnS000067093g06	-	15	3	404400;404593;404548
TnS000435929g02	-	4	1	34823
TnS000437027g03	-	12	1	185037
TnS000765213g12	-	121	3	1249157;1249132;1249189
TnS000842779g05	+	14	3	270524;270480;270548
TnS000109391g07	-	9	1	1314954
TnS000432977g09	-	37	3	1581463;1581593;1581748
TnS000958977g04	-	8	2	1110430;1110512
TnS000813697g03	+	7	2	198024;198607
TnS001016353g04	-	5	1	311504
TnS000020415g07	-	14	2	634308;634374
TnS000990617g01	-	7	1	149974
TnS000577547g05	-	35	3	105053;104823;104736
TnS001013469g02	+	9	2	241146;241258
TnS001032845g15	+	23	2	1908797;1908684
TnS000905353g06	+	8	2	1349628;1349751
TnS000945431g05	+	12	2	401110;401238
TnS000533161g01	-	15	2	8906;8848
TnS000830731g02	-	4	1	289438
TnS000295787g04	+	20	2	415091;415166
TnS000292945g03	+	6	2	186749;186865
TnS000961765g11	-	45	7	797592;797327;797493;797524;798465;797546;797677
TnS000865951g03	+	2	1	316561
TnS000706027g05	-	7	2	409176;409358
TnS000662845g02	-	20	3	66412;66281;66251
TnS000009469g05	-	138	4	487679;487707;487775;487582
TnS001039111g01	-	3	1	6298
TnS000460863g03	+	7	2	165463;165504
TnS000009855g02	-	2	1	180808
TnS000827741g02	-	2	1	125991
TnS001005435g04	-	6	1	118675
TnS000934877g01	-	16	3	134065;134262;134124
TnS000495167g06	+	7	1	454478
TnS000346691g06	+	6	1	971572
TnS000133367g01	-	3	1	5217
TnS000068501g07	+	3	1	1584538
TnS000867527g01	+	7	1	94681
TnS000541611g01	+	4	1	15081
TnS000239687g02	-	19	3	40964;41044;62951
TnS000059937g05	+	8	2	484926;505495
TnS001042601g03	-	2	1	360607
TnS000692561g01	+	12	2	14574;14781
TnS000972061g02	-	3	1	99141
TnS000441621g06	+	24	3	353667;353340;353607
TnS000662845g01	+	5	1	53264
TnS000676227g06	-	12	3	725377;725504;725304
TnS000468539g02	-	23	2	207487;207421
TnS000142969g02	-	6	2	28935;28994
TnS000822271g04	-	20	2	294165;293763
TnS000720319g03	-	5	1	136508
TnS000969393g06	-	6	1	1124537
TnS000899267g03	-	3	1	389080
TnS000953295g01	+	4	1	60429
TnS000482629g02	+	6	1	208738
TnS000809513g01	+	5	1	16511
TnS000286579g01	+	8	1	74953
TnS000182121g06	+	8	1	494697
TnS000473551g05	+	14	4	724694;724828;724578;724665
TnS000896915g01	-	5	2	153820;153914
TnS000119857g02	-	4	1	214278
TnS000925893g02	+	3	1	800014
TnS000302467g02	-	52	5	13422;13146;13488;13660;14279
TnS000216893g01	+	44	3	41678;41731;41591
TnS000703273g20	+	20	1	1989671
TnS000052095g02	+	17	2	401558;401597
TnS000869025g02	-	29	4	112349;112368;112427;112309
TnS000647971g07	+	10	2	301853;301741
TnS000895793g02	-	56	5	214783;214891;214607;214762;214572
TnS000599807g01	+	21	2	41524;41296
TnS000426595g06	+	9	2	578362;578654
TnS000669375g01	-	35	4	6348;6186;6273;6376
TnS000099047g01	+	3	1	16974
TnS000724829g01	-	11	2	118810;118900
TnS000390199g08	-	6	1	347186
TnS000449193g02	-	13	1	101346
TnS000238769g02	-	12	3	79970;77939;80075
TnS000811647g01	+	9	2	147682;94575
TnS000085963g01	+	6	1	126974
TnS000503971g05	-	36	4	262494;262429;284150;262348
TnS000001209g01	-	10	2	82210;82229
TnS000701839g04	-	2	1	452196
TnS000769825g01	+	12	3	212051;211985;212114
TnS001005993g03	+	5	1	110586
TnS000705219g01	+	29	5	53333;53313;53353;52995;53091
TnS000696049g01	-	11	1	4848
TnS000979079g04	-	2	1	525320
TnS000893919g02	+	11	3	141079;141022;141171
TnS000579963g02	+	2	1	86948
TnS000202953g03	-	14	3	390465;390442;390567
TnS001039353g05	+	7	1	384085
TnS000111237g01	-	3	1	33638
TnS000967731g04	+	4	1	345819
TnS000153393g01	+	7	1	52431
TnS000058587g04	+	2	1	320206
TnS000047801g04	+	6	1	181235
TnS000605517g02	-	4	1	41330
TnS001020077g01	+	3	1	185265
TnS000591365g21	-	4	1	2450751
TnS000648635g03	-	2	1	38174
TnS000638177g13	+	5	1	2118705
TnS000553317g06	-	16	3	447689;448032;447966
TnS000737937g02	+	16	2	328689;328664
TnS000814197g05	-	3	1	441745
TnS000317349g02	+	4	1	83340
TnS000985183g05	+	7	1	927328
TnS000971669g05	-	7	2	292402;343288
TnS000078691g05	-	8	1	417075
TnS000777061g01	+	10	1	116379
TnS000782909g01	+	10	1	88213
TnS000361741g03	+	8	2	154669;154556
TnS000053911g05	+	5	2	285670;288071
TnS000990499g04	-	4	1	310146
TnS000920189g07	+	11	2	743625;743655
TnS000339815g02	-	5	1	79683
TnS000884125g02	-	7	1	135564
TnS001026065g01	-	33	5	5846;6007;5906;5931;5954
TnS000083879g02	+	6	1	533595
TnS000134093g09	+	7	3	623335;623386;623456
TnS001001281g01	-	14	2	14519;14689
TnS000980857g06	-	8	1	418937
TnS000536859g02	+	48	4	634709;634615;634684;631052
TnS000180755g03	+	4	1	432276
TnS000576021g03	+	56	3	247737;247769;244511
TnS000161907g08	-	21	4	1220038;1220085;1220260;1220345
TnS000306723g02	-	10	2	123907;131498
TnS000755945g04	-	4	1	134768
TnS000789319g01	+	3	1	9772
TnS000254617g01	+	19	3	42241;42412;42859
TnS000239525g03	+	3	1	158381
TnS000155567g04	-	5	1	282343
TnS000731437g01	+	8	1	130915
TnS000087947g01	-	5	1	81718
TnS000199425g13	-	2	1	866837
TnS000397783g02	-	5	1	21307
TnS000468567g07	+	5	1	418456
TnS000710945g01	+	7	2	59012;59065
TnS000155041g01	-	7	1	24107
TnS000982243g06	+	7	2	575419;575451
TnS000253501g08	+	5	1	268077
TnS000423555g05	-	3	1	338396
TnS000833683g07	-	2	1	1085237
TnS000738073g06	-	5	2	618326;620151
TnS000674141g29	+	2	1	2770378
TnS000063969g01	-	21	3	77688;77722;83392
TnS000026071g02	+	19	4	426432;421176;427306;426842
TnS000373995g07	-	10	1	540971
TnS000799569g05	-	27	6	662616;662493;662513;662679;662702;662800
TnS000174381g02	+	2	1	179724
TnS000450229g06	-	8	2	395901;396111
TnS000773353g01	+	2	1	62517
TnS000729703g16	+	15	2	1958249;1959408
TnS000047601g16	-	3	1	762375
TnS000726839g01	+	34	5	46943;46753;46798;45353;47172
TnS000967423g04	-	6	1	190016
TnS000249451g03	+	11	3	503253;503407;503360
TnS000362099g03	-	10	2	308437;310531
TnS000297983g06	-	3	1	660423
TnS000626235g01	+	8	1	118048
TnS000798949g01	-	39	6	86288;86250;86573;86163;86379;86310
TnS000079755g02	+	7	1	295824
TnS000032089g01	+	107	4	43282;43223;43165;43242
TnS000915107g05	+	31	5	494171;494237;494456;494371;494406
TnS000504965g01	-	9	3	125648;125691;125787
TnS000535969g01	-	3	1	197624
TnS001033533g01	+	12	2	65602;65502
TnS000249711g01	-	6	2	46559;46448
TnS000461511g14	-	4	1	1240852
TnS000918683g04	-	3	1	774371
TnS000615653g09	-	4	1	1661040
TnS000019377g03	+	12	2	594125;594182
TnS000703479g01	+	8	1	10184
TnS000898189g02	+	6	1	394196
TnS000027907g04	+	8	1	323584
TnS000810107g06	-	35	3	239643;239685;239712
TnS000188137g01	-	5	1	4830
TnS000129707g01	+	5	1	76144
TnS000972073g01	+	4	2	633673;633594
TnS000715591g05	-	6	1	618714
[truncated: 3,648 more rows]
