# Supplementary material for: Single-Molecule Long-Read Sequencing Reveals the Diversity of Full-Length Transcripts in Leaves of Gnetum (Gnetales)
Source: Int J Mol Sci. 2019 Dec 17;20(24):6350. doi: 10.3390/ijms20246350 (PMC6941099; doi:10.3390/ijms20246350)
Supplement: Supplementary file 1 [file ijms-20-06350-s001.zip › File S4. List of bHLH gene family identified in Gnetum genome and leaf transcriptome.xls]

## Sheet: bHLH in genome
<seq id>	<alignment start>	<alignment end>	<envelope start>	<envelope end>	<hmm acc>	<hmm name>	<type>	<hmm start>	<hmm end>	<hmm length>	<bit score>	<E-value>	<significance>	<clan>
TnS000462743t01	55	238	55	238	PF14215.6	bHLH-MYC_N	Family	1	175	175	180.6	3.3e-53	1	CL0161
TnS000462743t01	451	497	449	497	PF00010.26	HLH	Domain	4	53	53	43.7	2e-11	1	No_clan
TnS000461511t13	51	225	51	225	PF14215.6	bHLH-MYC_N	Family	1	175	175	160.6	4.3e-47	1	CL0161
TnS000461511t13	362	408	360	408	PF00010.26	HLH	Domain	4	53	53	44.1	1.5e-11	1	No_clan
TnS000873383t04	43	226	43	236	PF14215.6	bHLH-MYC_N	Family	1	163	175	134.1	6e-39	1	CL0161
TnS000873383t04	388	434	386	434	PF00010.26	HLH	Domain	4	53	53	43.6	2e-11	1	No_clan
TnS000889905t02	61	239	61	239	PF14215.6	bHLH-MYC_N	Family	1	175	175	139.6	1.2e-40	1	CL0161
TnS000889905t02	493	538	491	539	PF00010.26	HLH	Domain	4	52	53	40	2.7e-10	1	No_clan
TnS000896885t01	24	207	22	207	PF14215.6	bHLH-MYC_N	Family	4	175	175	161.4	2.4e-47	1	CL0161
TnS000896885t01	428	473	426	473	PF00010.26	HLH	Domain	5	53	53	41.9	6.9e-11	1	No_clan
TnS000317261t06	16	197	15	197	PF14215.6	bHLH-MYC_N	Family	2	175	175	173.8	4e-51	1	CL0161
TnS000839827t05	33	75	27	76	PF00010.26	HLH	Domain	7	52	53	37.5	1.7e-09	1	No_clan
TnS001034817t01	33	176	31	179	PF14215.6	bHLH-MYC_N	Family	3	171	175	66.5	3.4e-18	1	CL0161
TnS001034817t01	336	379	330	379	PF00010.26	HLH	Domain	7	53	53	46	3.7e-12	1	No_clan
TnS000008943t01	283	325	279	326	PF00010.26	HLH	Domain	7	52	53	37.4	1.8e-09	1	No_clan
TnS000332527t24	188	233	185	233	PF00010.26	HLH	Domain	5	53	53	40	2.8e-10	1	No_clan
TnS000963655t02	203	246	197	246	PF00010.26	HLH	Domain	7	53	53	42.3	5.3e-11	1	No_clan
TnS000976213t02	200	242	196	243	PF00010.26	HLH	Domain	7	52	53	41.5	9.6e-11	1	No_clan
TnS001023411t07	117	159	111	159	PF00010.26	HLH	Domain	8	53	53	43.5	2.3e-11	1	No_clan
TnS000345015t01	172	218	170	218	PF00010.26	HLH	Domain	4	53	53	38.9	6.1e-10	1	No_clan
TnS000009855t07	207	257	207	257	PF00010.26	HLH	Domain	1	53	53	40.5	2e-10	1	No_clan
TnS000727553t09	127	173	125	174	PF00010.26	HLH	Domain	3	52	53	47.1	1.7e-12	1	No_clan
TnS000031647t15	56	97	51	98	PF00010.26	HLH	Domain	8	52	53	30.9	2e-07	1	No_clan
TnS000400895t07	285	330	282	330	PF00010.26	HLH	Domain	5	53	53	38.9	6.1e-10	1	No_clan
TnS000683165t01	283	328	280	328	PF00010.26	HLH	Domain	5	53	53	37.5	1.7e-09	1	No_clan
TnS000150193t05	190	241	190	241	PF00010.26	HLH	Domain	1	53	53	39.2	4.8e-10	1	No_clan
TnS000990985t01	81	150	69	153	PF14215.6	bHLH-MYC_N	Family	98	171	175	30.9	3e-07	1	CL0161
TnS000990985t01	302	347	299	348	PF00010.26	HLH	Domain	4	52	53	36.5	3.5e-09	1	No_clan
TnS000650281t01	2	50	1	50	PF00010.26	HLH	Domain	4	53	53	40.8	1.6e-10	1	No_clan
TnS001007481t03	104	155	104	155	PF00010.26	HLH	Domain	1	53	53	34.6	1.3e-08	1	No_clan
TnS000072739t01	131	177	129	177	PF00010.26	HLH	Domain	4	53	53	51.4	7.5e-14	1	No_clan
TnS000420067t01	175	217	170	217	PF00010.26	HLH	Domain	8	53	53	38.8	6.7e-10	1	No_clan
TnS000093273t09	7	150	5	153	PF14215.6	bHLH-MYC_N	Family	3	171	175	71.3	1.1e-19	1	CL0161
TnS000093273t09	315	358	309	358	PF00010.26	HLH	Domain	7	53	53	43	3.1e-11	1	No_clan
TnS000226135t02	221	272	221	272	PF00010.26	HLH	Domain	1	53	53	43.4	2.5e-11	1	No_clan
TnS000478175t02	235	277	230	278	PF00010.26	HLH	Domain	7	52	53	33.5	3.1e-08	1	No_clan
TnS000005539t06	391	437	389	437	PF00010.26	HLH	Domain	4	53	53	56.4	2.1e-15	1	No_clan
TnS000498063t28	492	538	490	538	PF00010.26	HLH	Domain	4	53	53	49.8	2.4e-13	1	No_clan
TnS000170537t04	310	357	308	357	PF00010.26	HLH	Domain	4	53	53	26.7	4e-06	1	No_clan
TnS000252889t02	2	40	1	40	PF00010.26	HLH	Domain	12	53	53	31.5	1.3e-07	1	No_clan
TnS000480571t05	56	97	52	97	PF00010.26	HLH	Domain	9	53	53	30.4	2.8e-07	1	No_clan
TnS000889809t02	202	250	200	250	PF00010.26	HLH	Domain	3	53	53	27.2	2.7e-06	1	No_clan
TnS000933653t01	255	302	253	302	PF00010.26	HLH	Domain	4	53	53	27.7	2e-06	1	No_clan
TnS000902409t02	157	204	155	204	PF00010.26	HLH	Domain	4	53	53	28	1.6e-06	1	No_clan
TnS000191245t11	15	55	11	55	PF00010.26	HLH	Domain	10	53	53	42.5	4.6e-11	1	No_clan
TnS000528313t01	444	491	442	491	PF00010.26	HLH	Domain	4	53	53	25.4	1e-05	1	No_clan
TnS000191245t12	85	125	79	125	PF00010.26	HLH	Domain	10	53	53	39.3	4.6e-10	1	No_clan
TnS000146937t01	164	204	157	204	PF00010.26	HLH	Domain	10	53	53	38.9	6.2e-10	1	No_clan
TnS000142615t10	235	262	232	267	PF00010.26	HLH	Domain	5	35	53	21.1	0.00022	1	No_clan
TnS000560433t07	408	453	404	453	PF00010.26	HLH	Domain	6	53	53	38.2	9.9e-10	1	No_clan
TnS001030345t01	165	213	163	213	PF00010.26	HLH	Domain	4	53	53	30.5	2.5e-07	1	No_clan
TnS001032845t12	465	511	461	511	PF00010.26	HLH	Domain	6	53	53	36.5	3.5e-09	1	No_clan
TnS000160189t01	20	60	12	60	PF00010.26	HLH	Domain	10	53	53	35.6	6.7e-09	1	No_clan
TnS000621229t01	26	65	22	66	PF00010.26	HLH	Domain	10	52	53	30.9	1.9e-07	1	No_clan
TnS000984307t01	20	60	16	60	PF00010.26	HLH	Domain	10	53	53	29.3	6.1e-07	1	No_clan
TnS013870792t01	20	60	16	60	PF00010.26	HLH	Domain	10	53	53	29.3	6.1e-07	1	No_clan
TnS000989603t02	51	84	49	106	PF00010.26	HLH	Domain	4	40	53	26.3	5.5e-06	1	No_clan
TnS000904759t01	264	313	263	313	PF00010.26	HLH	Domain	2	53	53	52.4	3.7e-14	1	No_clan
TnS000358499t01	183	227	182	228	PF00010.26	HLH	Domain	5	52	53	30.5	2.6e-07	1	No_clan
TnS000959461t08	9	79	3	81	PF16987.5	KIX_2	Domain	10	80	82	90.8	4e-26	1	CL0589
TnS000049607t21	83	138	83	139	PF00010.26	HLH	Domain	1	52	53	40	2.8e-10	1	No_clan
TnS000766551t09	32	72	32	72	PF00010.26	HLH	Domain	14	53	53	21.4	0.00018	1	No_clan
TnS000376107t05	5	175	5	175	PF14215.6	bHLH-MYC_N	Family	1	175	175	117.2	9.5e-34	1	CL0161
TnS000989471t01	165	212	163	212	PF00010.26	HLH	Domain	4	53	53	42.1	6e-11	1	No_clan
TnS000952905t01	75	122	74	123	PF00010.26	HLH	Domain	4	52	53	40.6	1.9e-10	1	No_clan
TnS000319463t02	78	125	76	126	PF00010.26	HLH	Domain	4	52	53	30.7	2.3e-07	1	No_clan
TnS000522447t04	41	90	41	91	PF00010.26	HLH	Domain	1	52	53	35.1	9.7e-09	1	No_clan
TnS000617339t02	67	116	67	117	PF00010.26	HLH	Domain	1	52	53	33	4.2e-08	1	No_clan
TnS000820837t01	121	168	119	168	PF00010.26	HLH	Domain	3	53	53	52	4.9e-14	1	No_clan
TnS000041003t02	203	250	201	250	PF00010.26	HLH	Domain	3	53	53	47	1.8e-12	1	No_clan
TnS000390009t01	145	192	143	192	PF00010.26	HLH	Domain	3	53	53	50.8	1.2e-13	1	No_clan
TnS000254749t09	20	71	20	72	PF00010.26	HLH	Domain	1	52	53	36.4	3.6e-09	1	No_clan
TnS000490963t01	16	208	16	208	PF14215.6	bHLH-MYC_N	Family	1	175	175	114.3	7.5e-33	1	CL0161
TnS000142615t04	14	187	11	187	PF14215.6	bHLH-MYC_N	Family	5	175	175	104.9	5.8e-30	1	CL0161
TnS000790525t03	12	201	12	201	PF14215.6	bHLH-MYC_N	Family	1	175	175	117.5	7.5e-34	1	CL0161
TnS000489311t06	64	107	62	107	PF00010.26	HLH	Domain	8	53	53	29.7	4.7e-07	1	No_clan
TnS000869183t02	15	143	15	144	PF13671.6	AAA_33	Domain	1	142	143	38.4	1.2e-09	1	CL0023
TnS000869183t02	364	458	364	474	PF01661.21	Macro	Domain	1	83	118	35.1	1.1e-08	1	CL0223
TnS000869183t02	600	713	598	713	PF11969.8	DcpS_C	Family	3	114	114	73.8	1.5e-20	1	CL0265
TnS000869183t02	718	773	718	775	PF16278.5	zf-C2HE	Domain	1	61	64	38.3	1.3e-09	1	CL0361

## Sheet: bHLH in leaf
<seq id>	<alignment start>	<alignment end>	<envelope start>	<envelope end>	<hmm acc>	<hmm name>	<type>	<hmm start>	<hmm end>	<hmm length>	<bit score>	<E-value>	<significance>	<clan>
TnS000420067g01_novel01	175	217	170	217	PF00010.26	HLH	Domain	8	53	53	38.8	6.6e-10	1	No_clan
TnS000896885t01	24	207	22	207	PF14215.6	bHLH-MYC_N	Family	4	175	175	161.4	2.4e-47	1	CL0161
TnS000896885t01	428	473	426	473	PF00010.26	HLH	Domain	5	53	53	41.9	6.9e-11	1	No_clan
TnS000963655g02_novel01	185	228	179	228	PF00010.26	HLH	Domain	7	53	53	42.5	4.8e-11	1	No_clan
TnS001032845t12	465	511	461	511	PF00010.26	HLH	Domain	6	53	53	36.5	3.5e-09	1	No_clan
TnS000170537g04_novel01	310	357	308	357	PF00010.26	HLH	Domain	4	53	53	26.7	4.1e-06	1	No_clan
TnS000170537t04	310	357	308	357	PF00010.26	HLH	Domain	4	53	53	26.7	4e-06	1	No_clan
TnS000902409g02_novel01	157	204	155	204	PF00010.26	HLH	Domain	4	53	53	28	1.6e-06	1	No_clan
TnS000902409t02	157	204	155	204	PF00010.26	HLH	Domain	4	53	53	28	1.6e-06	1	No_clan
TnS000498063g28_novel01	492	538	490	538	PF00010.26	HLH	Domain	4	53	53	49.8	2.4e-13	1	No_clan
TnS000498063g28_novel02	492	538	490	538	PF00010.26	HLH	Domain	4	53	53	49.8	2.4e-13	1	No_clan
TnS000498063g28_novel03	492	538	490	538	PF00010.26	HLH	Domain	4	53	53	49.8	2.4e-13	1	No_clan
TnS000072739t01	131	177	129	177	PF00010.26	HLH	Domain	4	53	53	51.4	7.5e-14	1	No_clan
TnS000226135g02_novel01	221	272	221	272	PF00010.26	HLH	Domain	1	53	53	43.4	2.5e-11	1	No_clan
TnS000528313t01	444	491	442	491	PF00010.26	HLH	Domain	4	53	53	25.4	1e-05	1	No_clan
TnS000976213t02	200	242	196	243	PF00010.26	HLH	Domain	7	52	53	41.5	9.6e-11	1	No_clan
TnS000560433g07_novel01	408	453	404	453	PF00010.26	HLH	Domain	6	53	53	38.3	9.5e-10	1	No_clan
TnS000560433t07	408	453	404	453	PF00010.26	HLH	Domain	6	53	53	38.2	9.9e-10	1	No_clan
TnS000889809t02	202	250	200	250	PF00010.26	HLH	Domain	3	53	53	27.2	2.7e-06	1	No_clan
TnS000889905t02	61	239	61	239	PF14215.6	bHLH-MYC_N	Family	1	175	175	139.6	1.2e-40	1	CL0161
TnS000889905t02	493	538	491	539	PF00010.26	HLH	Domain	4	52	53	40	2.7e-10	1	No_clan
TnS000952905g01_novel01	2	41	1	42	PF00010.26	HLH	Domain	12	52	53	31.7	1.1e-07	1	No_clan
TnS001023411t07	117	159	111	159	PF00010.26	HLH	Domain	8	53	53	43.5	2.3e-11	1	No_clan
TnS000008943t01	388	430	384	431	PF00010.26	HLH	Domain	7	52	53	37	2.4e-09	1	No_clan
TnS000617339t02	67	116	67	117	PF00010.26	HLH	Domain	1	52	53	33	4.2e-08	1	No_clan
TnS000904759g01_novel01	264	313	263	313	PF00010.26	HLH	Domain	2	53	53	52.4	3.8e-14	1	No_clan
TnS000150193g05_novel01	213	264	213	264	PF00010.26	HLH	Domain	1	53	53	39.1	5.2e-10	1	No_clan
TnS000462743t01	55	238	55	238	PF14215.6	bHLH-MYC_N	Family	1	175	175	180.6	3.3e-53	1	CL0161
TnS000462743t01	451	497	449	497	PF00010.26	HLH	Domain	4	53	53	43.7	2e-11	1	No_clan
TnS000319463g02_novel01	78	125	76	126	PF00010.26	HLH	Domain	4	52	53	31.8	1e-07	1	No_clan
TnS000319463g02_novel02	2	41	1	42	PF00010.26	HLH	Domain	12	52	53	21.6	0.00015	1	No_clan
TnS000319463t02	78	125	76	126	PF00010.26	HLH	Domain	4	52	53	30.7	2.3e-07	1	No_clan
TnS001030345g01_novel01	165	213	163	213	PF00010.26	HLH	Domain	4	53	53	30.9	1.9e-07	1	No_clan
